# Supplementary material for: Identification and mechanistic basis of non-ACE2 blocking neutralizing antibodies from COVID-19 patients with deep RNA sequencing and molecular dynamics simulations
Source: PubMed Central journal article supplement (PMC9800910; doi:10.3389/fmolb.2022.1080964), 2022-12-16
Supplement: DataSheet3.pdf [file DataSheet3.pdf]

REMARK 3  
 REMARK 3 REFINEMENT.  
 REMARK 3 PROGRAM : PHENIX (1.18.2\_3874:  
 phenix.real\_space\_refine)  
 REMARK 3 AUTHORS :  
 Adams,Afonine,Bunkoczi,Burnley,Chen,Dar,Davis,  
 REMARK 3 : Draizen,Echols,Gildea,Gros,Grosse-  
 Kunstleve,Headd,  
 REMARK 3 :  
 Hintze,Hung,Ioerger,Liebschner,McCoy,McKee,Moriarty,  
 REMARK 3 :  
 Oeffner,Poon,Read,Richardson,Richardson,Sacchettini,  
 REMARK 3 :  
 Sauter,Sobolev,Storoni,Terwilliger,Williams,Zwart  
 REMARK 3  
 REMARK 3 SCATTERING TABLE: ELECTRON  
 REMARK 3  
 REMARK 3 REFINEMENT TARGET: REAL-SPACE (WEIGHTED MAP SUM AT ATOM  
 CENTERS)  
 REMARK 3  
 REMARK 3 MODEL TO MAP FIT.  
 REMARK 3 CC\_mask : 0.8735  
 REMARK 3 CC\_volume: 0.8655  
 REMARK 3 CC\_peaks : 0.8341  
 REMARK 3  
 REMARK 3 GEOMETRY RESTRAINTS LIBRARY: GEOSTD + MONOMER LIBRARY + CDL  
 V1.2  
 REMARK 3 DEVIATIONS FROM IDEAL VALUES.  
 REMARK 3 BOND : 0.006 0.067 3383  
 REMARK 3 ANGLE : 0.829 7.991 4594  
 REMARK 3 CHIRALITY : 0.052 0.197 509  
 REMARK 3 PLANARITY : 0.006 0.077 582  
 REMARK 3 DIHEDRAL : 13.560 179.842 505  
 REMARK 3 MIN NONBONDED DISTANCE : 2.158  
 REMARK 3  
 REMARK 3 MOLPROBITY STATISTICS.  
 REMARK 3 ALL-ATOM CLASHSCORE : 5.60  
 REMARK 3 RAMACHANDRAN PLOT:  
 REMARK 3 OUTLIERS : 0.50 %  
 REMARK 3 ALLOWED : 5.97 %  
 REMARK 3 FAVORED : 93.53 %  
 REMARK 3 ROTAMER OUTLIERS : 1.14 %  
 REMARK 3 CBETA DEVIATIONS : 0.00 %  
 REMARK 3 PEPTIDE PLANE:  
 REMARK 3 CIS-PROLINE : 5.56 %  
 REMARK 3 CIS-GENERAL : 0.00 %  
 REMARK 3 TWISTED PROLINE : 0.00 %  
 REMARK 3 TWISTED GENERAL : 0.52 %  
 REMARK 3  
 REMARK 3 RAMA-Z (RAMACHANDRAN PLOT Z-SCORE):

REMARK 3 INTERPRETATION: BAD |RAMA-Z| > 3; SUSPICIOUS 2 < |RAMA-Z| <  
3; GOOD

REMARK 3 SCORES FOR WHOLE/HELIX/SHEET/LOOP ARE SCALED INDEPENDENTLY;  
REMARK 3 THEREFORE, THE VALUES ARE NOT RELATED IN A SIMPLE MANNER.  
REMARK 3 WHOLE: -0.66 (0.40), RESIDUES: 402  
REMARK 3 HELIX: -3.62 (0.68), RESIDUES: 27  
REMARK 3 SHEET: 0.68 (0.44), RESIDUES: 140  
REMARK 3 LOOP : -0.73 (0.37), RESIDUES: 235  
REMARK 3

HELIX 1 1 PRO B 199 ASP B 201 5  
3  
HELIX 2 2 PHE C 338 PHE C 342 5  
5  
HELIX 3 3 LEU C 387 ASP C 389 5  
3  
HELIX 4 4 GLY C 404 GLN C 409 5  
6  
HELIX 5 5 LYS C 417 TYR C 421 1  
5  
HELIX 6 6 ASN C 439 ASP C 442 1  
4  
HELIX 7 7 VAL C 502 TYR C 504 5  
3  
HELIX 8 8 PHE A 29 SER A 31 5  
3  
HELIX 9 9 ALA A 88 ASP A 90 5  
3

SHEET 1 A 4 MET B 123 GLN B 125 0  
SHEET 2 A 4 THR B 139 ALA B 144 -1 N ARG B 143 0 THR B 124  
SHEET 3 A 4 GLU B 189 THR B 193 -1 N LEU B 192 0 ILE B 140  
SHEET 4 A 4 SER B 182 SER B 186 -1 N SER B 186 0 GLU B 189  
SHEET 1 B 2 THR B 129 ALA B 132 0  
SHEET 2 B 2 LYS B 222 ILE B 225 1 N LYS B 222 0 LEU B 130  
SHEET 1 C 3 THR B 204 GLN B 209 0  
SHEET 2 C 3 LEU B 152 GLN B 157 -1 N GLN B 157 0 THR B 204  
SHEET 3 C 3 LYS B 164 ILE B 167 -1 N ILE B 167 0 TRP B 154  
SHEET 1 D 5 ASN C 354 SER C 359 0  
SHEET 2 D 5 ASN C 394 ARG C 403 -1 N SER C 399 0 ASN C 354  
SHEET 3 D 5 PRO C 506 SER C 513 -1 N SER C 513 0 TYR C 396  
SHEET 4 D 5 GLY C 431 ASN C 437 -1 N TRP C 436 0 ARG C 508  
SHEET 5 D 5 THR C 376 TYR C 380 -1 N TYR C 380 0 GLY C 431  
SHEET 1 E 2 LEU C 452 ARG C 454 0  
SHEET 2 E 2 LEU C 491 SER C 493 -1 N GLN C 492 0 TYR C 453  
SHEET 1 F 4 GLN A 3 SER A 7 0  
SHEET 2 F 4 LEU A 18 SER A 25 -1 N SER A 25 0 GLN A 3  
SHEET 3 F 4 THR A 78 MET A 83 -1 N MET A 83 0 LEU A 18  
SHEET 4 F 4 PHE A 68 ASP A 73 -1 N ASP A 73 0 THR A 78  
SHEET 1 G 5 THR A 113 VAL A 115 0  
SHEET 2 G 5 ALA A 92 SER A 100 -1 N TYR A 94 0 THR A 113  
SHEET 3 G 5 TYR A 32 GLN A 39 -1 N GLN A 39 0 VAL A 93

|        |         |          |          |          |       |          |        |        |       |       |   |       |    |
|--------|---------|----------|----------|----------|-------|----------|--------|--------|-------|-------|---|-------|----|
| SHEET  | 4       | G 5      | LEU A    | 45       | ILE A | 51       | -1     | N      | ILE A | 51    | 0 | MET A | 34 |
| SHEET  | 5       | G 5      | LYS A    | 58       | TYR A | 60       | -1     | N      | TYR A | 59    | 0 | VAL A | 50 |
| LINK   |         | C1       | NAG V    | 9        |       |          |        |        | 02    | BMA V | 8 |       |    |
| LINK   |         | C1       | BMA V    | 8        |       |          |        |        | 03    | BMA V | 3 |       |    |
| LINK   |         | C1       | NAG V    | 2        |       |          |        |        | 04    | NAG V | 1 |       |    |
| LINK   |         | C1       | BMA V    | 3        |       |          |        |        | 04    | NAG V | 2 |       |    |
| LINK   |         | C1       | FUC V    | 4        |       |          |        |        | 06    | NAG V | 1 |       |    |
| LINK   |         | C1       | BMA V    | 5        |       |          |        |        | 06    | BMA V | 3 |       |    |
| SSBOND | 1       | CYS B    | 142      |          | CYS B | 207      |        |        |       |       |   |       |    |
| SSBOND | 2       | CYS C    | 336      |          | CYS C | 361      |        |        |       |       |   |       |    |
| SSBOND | 3       | CYS C    | 379      |          | CYS C | 432      |        |        |       |       |   |       |    |
| SSBOND | 4       | CYS C    | 479      |          | CYS C | 487      |        |        |       |       |   |       |    |
| SSBOND | 5       | CYS A    | 22       |          | CYS A | 96       |        |        |       |       |   |       |    |
| CRYST1 | 100.000 | 100.000  | 100.000  | 90.00    | 90.00 | 90.00    | P      | 1      |       |       |   |       |    |
| SCALE1 |         | 0.010000 | 0.000000 | 0.000000 |       | 0.000000 |        |        |       |       |   |       |    |
| SCALE2 |         | 0.000000 | 0.010000 | 0.000000 |       | 0.000000 |        |        |       |       |   |       |    |
| SCALE3 |         | 0.000000 | 0.000000 | 0.010000 |       | 0.000000 |        |        |       |       |   |       |    |
| ATOM   | 1       | N        | ASP B    | 1        |       | 55.119   | 43.529 | 40.482 | 1.00  | 27.51 |   |       |    |
| N      |         |          |          |          |       |          |        |        |       |       |   |       |    |
| ATOM   | 2       | CA       | ASP B    | 1        |       | 55.600   | 44.374 | 41.565 | 1.00  | 27.51 |   |       |    |
| C      |         |          |          |          |       |          |        |        |       |       |   |       |    |
| ATOM   | 3       | C        | ASP B    | 1        |       | 55.829   | 45.800 | 41.078 | 1.00  | 27.51 |   |       |    |
| C      |         |          |          |          |       |          |        |        |       |       |   |       |    |
| ATOM   | 4       | O        | ASP B    | 1        |       | 56.140   | 46.019 | 39.911 | 1.00  | 27.51 |   |       |    |
| O      |         |          |          |          |       |          |        |        |       |       |   |       |    |
| ATOM   | 5       | CB       | ASP B    | 1        |       | 56.888   | 43.805 | 42.149 | 1.00  | 27.51 |   |       |    |
| C      |         |          |          |          |       |          |        |        |       |       |   |       |    |
| ATOM   | 6       | CG       | ASP B    | 1        |       | 57.937   | 43.561 | 41.094 | 1.00  | 27.51 |   |       |    |
| C      |         |          |          |          |       |          |        |        |       |       |   |       |    |
| ATOM   | 7       | OD1      | ASP B    | 1        |       | 57.556   | 43.384 | 39.922 | 1.00  | 27.51 |   |       |    |
| O      |         |          |          |          |       |          |        |        |       |       |   |       |    |
| ATOM   | 8       | OD2      | ASP B    | 1        |       | 59.136   | 43.553 | 41.434 | 1.00  | 27.51 |   |       |    |
| O      |         |          |          |          |       |          |        |        |       |       |   |       |    |
| ATOM   | 9       | N        | ILE B    | 2        |       | 55.674   | 46.765 | 41.977 | 1.00  | 21.42 |   |       |    |
| N      |         |          |          |          |       |          |        |        |       |       |   |       |    |
| ATOM   | 10      | CA       | ILE B    | 2        |       | 55.865   | 48.169 | 41.637 | 1.00  | 21.42 |   |       |    |
| C      |         |          |          |          |       |          |        |        |       |       |   |       |    |
| ATOM   | 11      | C        | ILE B    | 2        |       | 57.343   | 48.508 | 41.751 | 1.00  | 21.42 |   |       |    |
| C      |         |          |          |          |       |          |        |        |       |       |   |       |    |
| ATOM   | 12      | O        | ILE B    | 2        |       | 57.978   | 48.226 | 42.771 | 1.00  | 21.42 |   |       |    |
| O      |         |          |          |          |       |          |        |        |       |       |   |       |    |
| ATOM   | 13      | CB       | ILE B    | 2        |       | 55.015   | 49.068 | 42.546 | 1.00  | 21.42 |   |       |    |
| C      |         |          |          |          |       |          |        |        |       |       |   |       |    |
| ATOM   | 14      | CG1      | ILE B    | 2        |       | 53.535   | 48.717 | 42.399 | 1.00  | 21.42 |   |       |    |
| C      |         |          |          |          |       |          |        |        |       |       |   |       |    |
| ATOM   | 15      | CG2      | ILE B    | 2        |       | 55.263   | 50.531 | 42.235 | 1.00  | 21.42 |   |       |    |
| C      |         |          |          |          |       |          |        |        |       |       |   |       |    |
| ATOM   | 16      | CD1      | ILE B    | 2        |       | 52.684   | 49.162 | 43.548 | 1.00  | 21.42 |   |       |    |
| C      |         |          |          |          |       |          |        |        |       |       |   |       |    |
| ATOM   | 17      | N        | GLN B    | 3        |       | 57.896   | 49.111 | 40.705 | 1.00  | 23.36 |   |       |    |

|      |    |     |     |   |   |        |        |        |      |       |
|------|----|-----|-----|---|---|--------|--------|--------|------|-------|
| N    |    |     |     |   |   |        |        |        |      |       |
| ATOM | 18 | CA  | GLN | B | 3 | 59.303 | 49.478 | 40.686 | 1.00 | 23.36 |
| C    |    |     |     |   |   |        |        |        |      |       |
| ATOM | 19 | C   | GLN | B | 3 | 59.482 | 50.877 | 41.256 | 1.00 | 23.36 |
| C    |    |     |     |   |   |        |        |        |      |       |
| ATOM | 20 | O   | GLN | B | 3 | 58.771 | 51.808 | 40.869 | 1.00 | 23.36 |
| O    |    |     |     |   |   |        |        |        |      |       |
| ATOM | 21 | CB  | GLN | B | 3 | 59.866 | 49.411 | 39.267 | 1.00 | 23.36 |
| C    |    |     |     |   |   |        |        |        |      |       |
| ATOM | 22 | CG  | GLN | B | 3 | 59.594 | 48.105 | 38.557 | 1.00 | 23.36 |
| C    |    |     |     |   |   |        |        |        |      |       |
| ATOM | 23 | CD  | GLN | B | 3 | 60.007 | 46.905 | 39.372 | 1.00 | 23.36 |
| C    |    |     |     |   |   |        |        |        |      |       |
| ATOM | 24 | OE1 | GLN | B | 3 | 59.220 | 45.987 | 39.583 | 1.00 | 23.36 |
| O    |    |     |     |   |   |        |        |        |      |       |
| ATOM | 25 | NE2 | GLN | B | 3 | 61.249 | 46.902 | 39.834 | 1.00 | 23.36 |
| N    |    |     |     |   |   |        |        |        |      |       |
| ATOM | 26 | N   | MET | B | 4 | 60.429 | 51.016 | 42.176 | 1.00 | 19.78 |
| N    |    |     |     |   |   |        |        |        |      |       |
| ATOM | 27 | CA  | MET | B | 4 | 60.734 | 52.282 | 42.823 | 1.00 | 19.78 |
| C    |    |     |     |   |   |        |        |        |      |       |
| ATOM | 28 | C   | MET | B | 4 | 62.144 | 52.689 | 42.432 | 1.00 | 19.78 |
| C    |    |     |     |   |   |        |        |        |      |       |
| ATOM | 29 | O   | MET | B | 4 | 63.060 | 51.865 | 42.478 | 1.00 | 19.78 |
| O    |    |     |     |   |   |        |        |        |      |       |
| ATOM | 30 | CB  | MET | B | 4 | 60.624 | 52.164 | 44.347 | 1.00 | 19.78 |
| C    |    |     |     |   |   |        |        |        |      |       |
| ATOM | 31 | CG  | MET | B | 4 | 59.311 | 51.592 | 44.847 | 1.00 | 19.78 |
| C    |    |     |     |   |   |        |        |        |      |       |
| ATOM | 32 | SD  | MET | B | 4 | 57.901 | 52.632 | 44.444 | 1.00 | 19.78 |
| S    |    |     |     |   |   |        |        |        |      |       |
| ATOM | 33 | CE  | MET | B | 4 | 58.371 | 54.146 | 45.255 | 1.00 | 19.78 |
| C    |    |     |     |   |   |        |        |        |      |       |
| ATOM | 34 | N   | THR | B | 5 | 62.323 | 53.948 | 42.045 | 1.00 | 21.11 |
| N    |    |     |     |   |   |        |        |        |      |       |
| ATOM | 35 | CA  | THR | B | 5 | 63.651 | 54.417 | 41.677 | 1.00 | 21.11 |
| C    |    |     |     |   |   |        |        |        |      |       |
| ATOM | 36 | C   | THR | B | 5 | 63.882 | 55.811 | 42.240 | 1.00 | 21.11 |
| C    |    |     |     |   |   |        |        |        |      |       |
| ATOM | 37 | O   | THR | B | 5 | 62.978 | 56.642 | 42.249 | 1.00 | 21.11 |
| O    |    |     |     |   |   |        |        |        |      |       |
| ATOM | 38 | CB  | THR | B | 5 | 63.849 | 54.397 | 40.152 | 1.00 | 21.11 |
| C    |    |     |     |   |   |        |        |        |      |       |
| ATOM | 39 | OG1 | THR | B | 5 | 65.210 | 54.712 | 39.839 | 1.00 | 21.11 |
| O    |    |     |     |   |   |        |        |        |      |       |
| ATOM | 40 | CG2 | THR | B | 5 | 62.929 | 55.380 | 39.464 | 1.00 | 21.11 |
| C    |    |     |     |   |   |        |        |        |      |       |
| ATOM | 41 | N   | GLN | B | 6 | 65.091 | 56.060 | 42.725 | 1.00 | 20.54 |
| N    |    |     |     |   |   |        |        |        |      |       |
| ATOM | 42 | CA  | GLN | B | 6 | 65.445 | 57.335 | 43.329 | 1.00 | 20.54 |

|      |    |     |     |   |   |        |        |        |      |       |
|------|----|-----|-----|---|---|--------|--------|--------|------|-------|
| C    |    |     |     |   |   |        |        |        |      |       |
| ATOM | 43 | C   | GLN | B | 6 | 66.420 | 58.062 | 42.414 | 1.00 | 20.54 |
| C    |    |     |     |   |   |        |        |        |      |       |
| ATOM | 44 | O   | GLN | B | 6 | 67.358 | 57.456 | 41.894 | 1.00 | 20.54 |
| O    |    |     |     |   |   |        |        |        |      |       |
| ATOM | 45 | CB  | GLN | B | 6 | 66.048 | 57.129 | 44.719 | 1.00 | 20.54 |
| C    |    |     |     |   |   |        |        |        |      |       |
| ATOM | 46 | CG  | GLN | B | 6 | 65.073 | 56.510 | 45.687 | 1.00 | 20.54 |
| C    |    |     |     |   |   |        |        |        |      |       |
| ATOM | 47 | CD  | GLN | B | 6 | 65.700 | 56.116 | 47.004 | 1.00 | 20.54 |
| C    |    |     |     |   |   |        |        |        |      |       |
| ATOM | 48 | OE1 | GLN | B | 6 | 65.498 | 55.006 | 47.481 | 1.00 | 20.54 |
| O    |    |     |     |   |   |        |        |        |      |       |
| ATOM | 49 | NE2 | GLN | B | 6 | 66.439 | 57.028 | 47.611 | 1.00 | 20.54 |
| N    |    |     |     |   |   |        |        |        |      |       |
| ATOM | 50 | N   | SER | B | 7 | 66.186 | 59.359 | 42.211 | 1.00 | 28.45 |
| N    |    |     |     |   |   |        |        |        |      |       |
| ATOM | 51 | CA  | SER | B | 7 | 66.754 | 60.036 | 41.046 | 1.00 | 28.45 |
| C    |    |     |     |   |   |        |        |        |      |       |
| ATOM | 52 | C   | SER | B | 7 | 68.246 | 60.308 | 41.187 | 1.00 | 28.45 |
| C    |    |     |     |   |   |        |        |        |      |       |
| ATOM | 53 | O   | SER | B | 7 | 69.017 | 59.866 | 40.327 | 1.00 | 28.45 |
| O    |    |     |     |   |   |        |        |        |      |       |
| ATOM | 54 | CB  | SER | B | 7 | 66.001 | 61.331 | 40.739 | 1.00 | 28.45 |
| C    |    |     |     |   |   |        |        |        |      |       |
| ATOM | 55 | OG  | SER | B | 7 | 66.694 | 62.079 | 39.757 | 1.00 | 28.45 |
| O    |    |     |     |   |   |        |        |        |      |       |
| ATOM | 56 | N   | PRO | B | 8 | 68.718 | 61.030 | 42.213 | 1.00 | 27.25 |
| N    |    |     |     |   |   |        |        |        |      |       |
| ATOM | 57 | CA  | PRO | B | 8 | 70.171 | 61.101 | 42.408 | 1.00 | 27.25 |
| C    |    |     |     |   |   |        |        |        |      |       |
| ATOM | 58 | C   | PRO | B | 8 | 70.638 | 59.847 | 43.127 | 1.00 | 27.25 |
| C    |    |     |     |   |   |        |        |        |      |       |
| ATOM | 59 | O   | PRO | B | 8 | 70.325 | 59.637 | 44.302 | 1.00 | 27.25 |
| O    |    |     |     |   |   |        |        |        |      |       |
| ATOM | 60 | CB  | PRO | B | 8 | 70.349 | 62.363 | 43.267 | 1.00 | 27.25 |
| C    |    |     |     |   |   |        |        |        |      |       |
| ATOM | 61 | CG  | PRO | B | 8 | 68.962 | 62.860 | 43.587 | 1.00 | 27.25 |
| C    |    |     |     |   |   |        |        |        |      |       |
| ATOM | 62 | CD  | PRO | B | 8 | 68.013 | 61.754 | 43.279 | 1.00 | 27.25 |
| C    |    |     |     |   |   |        |        |        |      |       |
| ATOM | 63 | N   | SER | B | 9 | 71.350 | 58.982 | 42.404 | 1.00 | 29.14 |
| N    |    |     |     |   |   |        |        |        |      |       |
| ATOM | 64 | CA  | SER | B | 9 | 71.862 | 57.762 | 43.019 | 1.00 | 29.14 |
| C    |    |     |     |   |   |        |        |        |      |       |
| ATOM | 65 | C   | SER | B | 9 | 72.904 | 58.079 | 44.079 | 1.00 | 29.14 |
| C    |    |     |     |   |   |        |        |        |      |       |
| ATOM | 66 | O   | SER | B | 9 | 72.916 | 57.468 | 45.151 | 1.00 | 29.14 |
| O    |    |     |     |   |   |        |        |        |      |       |
| ATOM | 67 | CB  | SER | B | 9 | 72.445 | 56.838 | 41.956 | 1.00 | 29.14 |

|      |    |     |     |   |    |        |        |        |      |       |
|------|----|-----|-----|---|----|--------|--------|--------|------|-------|
| C    |    |     |     |   |    |        |        |        |      |       |
| ATOM | 68 | OG  | SER | B | 9  | 71.421 | 56.288 | 41.153 | 1.00 | 29.14 |
| O    |    |     |     |   |    |        |        |        |      |       |
| ATOM | 69 | N   | THR | B | 10 | 73.791 | 59.025 | 43.796 | 1.00 | 33.00 |
| N    |    |     |     |   |    |        |        |        |      |       |
| ATOM | 70 | CA  | THR | B | 10 | 74.754 | 59.490 | 44.777 | 1.00 | 33.00 |
| C    |    |     |     |   |    |        |        |        |      |       |
| ATOM | 71 | C   | THR | B | 10 | 74.864 | 61.000 | 44.659 | 1.00 | 33.00 |
| C    |    |     |     |   |    |        |        |        |      |       |
| ATOM | 72 | O   | THR | B | 10 | 74.626 | 61.572 | 43.595 | 1.00 | 33.00 |
| O    |    |     |     |   |    |        |        |        |      |       |
| ATOM | 73 | CB  | THR | B | 10 | 76.126 | 58.831 | 44.594 | 1.00 | 33.00 |
| C    |    |     |     |   |    |        |        |        |      |       |
| ATOM | 74 | OG1 | THR | B | 10 | 77.053 | 59.389 | 45.531 | 1.00 | 33.00 |
| O    |    |     |     |   |    |        |        |        |      |       |
| ATOM | 75 | CG2 | THR | B | 10 | 76.638 | 59.051 | 43.187 | 1.00 | 33.00 |
| C    |    |     |     |   |    |        |        |        |      |       |
| ATOM | 76 | N   | LEU | B | 11 | 75.203 | 61.643 | 45.768 | 1.00 | 36.94 |
| N    |    |     |     |   |    |        |        |        |      |       |
| ATOM | 77 | CA  | LEU | B | 11 | 75.224 | 63.096 | 45.795 | 1.00 | 36.94 |
| C    |    |     |     |   |    |        |        |        |      |       |
| ATOM | 78 | C   | LEU | B | 11 | 76.231 | 63.579 | 46.824 | 1.00 | 36.94 |
| C    |    |     |     |   |    |        |        |        |      |       |
| ATOM | 79 | O   | LEU | B | 11 | 76.192 | 63.157 | 47.982 | 1.00 | 36.94 |
| O    |    |     |     |   |    |        |        |        |      |       |
| ATOM | 80 | CB  | LEU | B | 11 | 73.831 | 63.641 | 46.101 | 1.00 | 36.94 |
| C    |    |     |     |   |    |        |        |        |      |       |
| ATOM | 81 | CG  | LEU | B | 11 | 73.692 | 65.126 | 46.391 | 1.00 | 36.94 |
| C    |    |     |     |   |    |        |        |        |      |       |
| ATOM | 82 | CD1 | LEU | B | 11 | 73.955 | 65.927 | 45.135 | 1.00 | 36.94 |
| C    |    |     |     |   |    |        |        |        |      |       |
| ATOM | 83 | CD2 | LEU | B | 11 | 72.296 | 65.370 | 46.876 | 1.00 | 36.94 |
| C    |    |     |     |   |    |        |        |        |      |       |
| ATOM | 84 | N   | SER | B | 12 | 77.131 | 64.456 | 46.396 | 1.00 | 41.19 |
| N    |    |     |     |   |    |        |        |        |      |       |
| ATOM | 85 | CA  | SER | B | 12 | 78.108 | 65.065 | 47.284 | 1.00 | 41.19 |
| C    |    |     |     |   |    |        |        |        |      |       |
| ATOM | 86 | C   | SER | B | 12 | 77.599 | 66.426 | 47.728 | 1.00 | 41.19 |
| C    |    |     |     |   |    |        |        |        |      |       |
| ATOM | 87 | O   | SER | B | 12 | 77.088 | 67.202 | 46.918 | 1.00 | 41.19 |
| O    |    |     |     |   |    |        |        |        |      |       |
| ATOM | 88 | CB  | SER | B | 12 | 79.465 | 65.205 | 46.593 | 1.00 | 41.19 |
| C    |    |     |     |   |    |        |        |        |      |       |
| ATOM | 89 | OG  | SER | B | 12 | 79.302 | 65.516 | 45.223 | 1.00 | 41.19 |
| O    |    |     |     |   |    |        |        |        |      |       |
| ATOM | 90 | N   | ALA | B | 13 | 77.723 | 66.704 | 49.020 | 1.00 | 42.09 |
| N    |    |     |     |   |    |        |        |        |      |       |
| ATOM | 91 | CA  | ALA | B | 13 | 77.234 | 67.957 | 49.571 | 1.00 | 42.09 |
| C    |    |     |     |   |    |        |        |        |      |       |
| ATOM | 92 | C   | ALA | B | 13 | 78.126 | 68.372 | 50.731 | 1.00 | 42.09 |

|      |     |     |     |   |    |        |        |        |      |       |
|------|-----|-----|-----|---|----|--------|--------|--------|------|-------|
| C    |     |     |     |   |    |        |        |        |      |       |
| ATOM | 93  | O   | ALA | B | 13 | 78.946 | 67.595 | 51.223 | 1.00 | 42.09 |
| O    |     |     |     |   |    |        |        |        |      |       |
| ATOM | 94  | CB  | ALA | B | 13 | 75.777 | 67.838 | 50.017 | 1.00 | 42.09 |
| C    |     |     |     |   |    |        |        |        |      |       |
| ATOM | 95  | N   | SER | B | 14 | 77.962 | 69.620 | 51.158 | 1.00 | 42.98 |
| N    |     |     |     |   |    |        |        |        |      |       |
| ATOM | 96  | CA  | SER | B | 14 | 78.711 | 70.175 | 52.272 | 1.00 | 42.98 |
| C    |     |     |     |   |    |        |        |        |      |       |
| ATOM | 97  | C   | SER | B | 14 | 77.755 | 70.509 | 53.408 | 1.00 | 42.98 |
| C    |     |     |     |   |    |        |        |        |      |       |
| ATOM | 98  | O   | SER | B | 14 | 76.535 | 70.524 | 53.237 | 1.00 | 42.98 |
| O    |     |     |     |   |    |        |        |        |      |       |
| ATOM | 99  | CB  | SER | B | 14 | 79.495 | 71.425 | 51.849 | 1.00 | 42.98 |
| C    |     |     |     |   |    |        |        |        |      |       |
| ATOM | 100 | OG  | SER | B | 14 | 78.634 | 72.395 | 51.285 | 1.00 | 42.98 |
| O    |     |     |     |   |    |        |        |        |      |       |
| ATOM | 101 | N   | VAL | B | 15 | 78.316 | 70.758 | 54.587 | 1.00 | 42.15 |
| N    |     |     |     |   |    |        |        |        |      |       |
| ATOM | 102 | CA  | VAL | B | 15 | 77.478 | 71.055 | 55.738 | 1.00 | 42.15 |
| C    |     |     |     |   |    |        |        |        |      |       |
| ATOM | 103 | C   | VAL | B | 15 | 76.749 | 72.368 | 55.509 | 1.00 | 42.15 |
| C    |     |     |     |   |    |        |        |        |      |       |
| ATOM | 104 | O   | VAL | B | 15 | 77.370 | 73.416 | 55.295 | 1.00 | 42.15 |
| O    |     |     |     |   |    |        |        |        |      |       |
| ATOM | 105 | CB  | VAL | B | 15 | 78.319 | 71.094 | 57.019 | 1.00 | 42.15 |
| C    |     |     |     |   |    |        |        |        |      |       |
| ATOM | 106 | CG1 | VAL | B | 15 | 77.454 | 71.480 | 58.198 | 1.00 | 42.15 |
| C    |     |     |     |   |    |        |        |        |      |       |
| ATOM | 107 | CG2 | VAL | B | 15 | 78.969 | 69.750 | 57.256 | 1.00 | 42.15 |
| C    |     |     |     |   |    |        |        |        |      |       |
| ATOM | 108 | N   | GLY | B | 16 | 75.422 | 72.315 | 55.545 | 1.00 | 43.40 |
| N    |     |     |     |   |    |        |        |        |      |       |
| ATOM | 109 | CA  | GLY | B | 16 | 74.599 | 73.495 | 55.439 | 1.00 | 43.40 |
| C    |     |     |     |   |    |        |        |        |      |       |
| ATOM | 110 | C   | GLY | B | 16 | 73.805 | 73.635 | 54.158 | 1.00 | 43.40 |
| C    |     |     |     |   |    |        |        |        |      |       |
| ATOM | 111 | O   | GLY | B | 16 | 72.902 | 74.478 | 54.114 | 1.00 | 43.40 |
| O    |     |     |     |   |    |        |        |        |      |       |
| ATOM | 112 | N   | ASP | B | 17 | 74.095 | 72.853 | 53.120 | 1.00 | 43.64 |
| N    |     |     |     |   |    |        |        |        |      |       |
| ATOM | 113 | CA  | ASP | B | 17 | 73.324 | 73.019 | 51.897 | 1.00 | 43.64 |
| C    |     |     |     |   |    |        |        |        |      |       |
| ATOM | 114 | C   | ASP | B | 17 | 71.927 | 72.422 | 52.024 | 1.00 | 43.64 |
| C    |     |     |     |   |    |        |        |        |      |       |
| ATOM | 115 | O   | ASP | B | 17 | 71.615 | 71.662 | 52.943 | 1.00 | 43.64 |
| O    |     |     |     |   |    |        |        |        |      |       |
| ATOM | 116 | CB  | ASP | B | 17 | 74.014 | 72.403 | 50.678 | 1.00 | 43.64 |
| C    |     |     |     |   |    |        |        |        |      |       |
| ATOM | 117 | CG  | ASP | B | 17 | 75.510 | 72.553 | 50.703 | 1.00 | 43.64 |

|      |     |     |     |   |    |        |        |        |            |
|------|-----|-----|-----|---|----|--------|--------|--------|------------|
| C    |     |     |     |   |    |        |        |        |            |
| ATOM | 118 | OD1 | ASP | B | 17 | 76.208 | 71.558 | 50.951 | 1.00 43.64 |
| O    |     |     |     |   |    |        |        |        |            |
| ATOM | 119 | OD2 | ASP | B | 17 | 75.993 | 73.678 | 50.475 | 1.00 43.64 |
| O    |     |     |     |   |    |        |        |        |            |
| ATOM | 120 | N   | LYS | B | 18 | 71.079 | 72.811 | 51.080 | 1.00 40.48 |
| N    |     |     |     |   |    |        |        |        |            |
| ATOM | 121 | CA  | LYS | B | 18 | 69.744 | 72.263 | 50.929 | 1.00 40.48 |
| C    |     |     |     |   |    |        |        |        |            |
| ATOM | 122 | C   | LYS | B | 18 | 69.830 | 71.068 | 49.996 | 1.00 40.48 |
| C    |     |     |     |   |    |        |        |        |            |
| ATOM | 123 | O   | LYS | B | 18 | 70.401 | 71.168 | 48.908 | 1.00 40.48 |
| O    |     |     |     |   |    |        |        |        |            |
| ATOM | 124 | CB  | LYS | B | 18 | 68.803 | 73.315 | 50.346 | 1.00 40.48 |
| C    |     |     |     |   |    |        |        |        |            |
| ATOM | 125 | CG  | LYS | B | 18 | 68.110 | 74.185 | 51.368 | 1.00 40.48 |
| C    |     |     |     |   |    |        |        |        |            |
| ATOM | 126 | CD  | LYS | B | 18 | 66.871 | 74.861 | 50.796 | 1.00 40.48 |
| C    |     |     |     |   |    |        |        |        |            |
| ATOM | 127 | CE  | LYS | B | 18 | 66.246 | 74.044 | 49.676 | 1.00 40.48 |
| C    |     |     |     |   |    |        |        |        |            |
| ATOM | 128 | NZ  | LYS | B | 18 | 64.766 | 74.185 | 49.650 | 1.00 40.48 |
| N    |     |     |     |   |    |        |        |        |            |
| ATOM | 129 | N   | ILE | B | 19 | 69.271 | 69.938 | 50.415 | 1.00 33.20 |
| N    |     |     |     |   |    |        |        |        |            |
| ATOM | 130 | CA  | ILE | B | 19 | 69.371 | 68.704 | 49.652 | 1.00 33.20 |
| C    |     |     |     |   |    |        |        |        |            |
| ATOM | 131 | C   | ILE | B | 19 | 67.962 | 68.218 | 49.353 | 1.00 33.20 |
| C    |     |     |     |   |    |        |        |        |            |
| ATOM | 132 | O   | ILE | B | 19 | 67.119 | 68.161 | 50.254 | 1.00 33.20 |
| O    |     |     |     |   |    |        |        |        |            |
| ATOM | 133 | CB  | ILE | B | 19 | 70.175 | 67.638 | 50.414 | 1.00 33.20 |
| C    |     |     |     |   |    |        |        |        |            |
| ATOM | 134 | CG1 | ILE | B | 19 | 71.647 | 68.029 | 50.432 | 1.00 33.20 |
| C    |     |     |     |   |    |        |        |        |            |
| ATOM | 135 | CG2 | ILE | B | 19 | 70.036 | 66.287 | 49.740 | 1.00 33.20 |
| C    |     |     |     |   |    |        |        |        |            |
| ATOM | 136 | CD1 | ILE | B | 19 | 72.280 | 68.029 | 49.090 | 1.00 33.20 |
| C    |     |     |     |   |    |        |        |        |            |
| ATOM | 137 | N   | THR | B | 20 | 67.705 | 67.888 | 48.092 | 1.00 27.05 |
| N    |     |     |     |   |    |        |        |        |            |
| ATOM | 138 | CA  | THR | B | 20 | 66.417 | 67.364 | 47.662 | 1.00 27.05 |
| C    |     |     |     |   |    |        |        |        |            |
| ATOM | 139 | C   | THR | B | 20 | 66.628 | 66.033 | 46.959 | 1.00 27.05 |
| C    |     |     |     |   |    |        |        |        |            |
| ATOM | 140 | O   | THR | B | 20 | 67.458 | 65.928 | 46.053 | 1.00 27.05 |
| O    |     |     |     |   |    |        |        |        |            |
| ATOM | 141 | CB  | THR | B | 20 | 65.697 | 68.349 | 46.737 | 1.00 27.05 |
| C    |     |     |     |   |    |        |        |        |            |
| ATOM | 142 | OG1 | THR | B | 20 | 65.264 | 69.480 | 47.498 | 1.00 27.05 |



|      |     |     |     |   |    |        |        |        |      |       |
|------|-----|-----|-----|---|----|--------|--------|--------|------|-------|
| O    |     |     |     |   |    |        |        |        |      |       |
| ATOM | 143 | CG2 | THR | B | 20 | 64.487 | 67.698 | 46.098 | 1.00 | 27.05 |
| C    |     |     |     |   |    |        |        |        |      |       |
| ATOM | 144 | N   | ILE | B | 21 | 65.879 | 65.020 | 47.385 | 1.00 | 22.41 |
| N    |     |     |     |   |    |        |        |        |      |       |
| ATOM | 145 | CA  | ILE | B | 21 | 65.954 | 63.672 | 46.839 | 1.00 | 22.41 |
| C    |     |     |     |   |    |        |        |        |      |       |
| ATOM | 146 | C   | ILE | B | 21 | 64.586 | 63.328 | 46.274 | 1.00 | 22.41 |
| C    |     |     |     |   |    |        |        |        |      |       |
| ATOM | 147 | O   | ILE | B | 21 | 63.568 | 63.564 | 46.929 | 1.00 | 22.41 |
| O    |     |     |     |   |    |        |        |        |      |       |
| ATOM | 148 | CB  | ILE | B | 21 | 66.377 | 62.654 | 47.913 | 1.00 | 22.41 |
| C    |     |     |     |   |    |        |        |        |      |       |
| ATOM | 149 | CG1 | ILE | B | 21 | 67.658 | 63.117 | 48.607 | 1.00 | 22.41 |
| C    |     |     |     |   |    |        |        |        |      |       |
| ATOM | 150 | CG2 | ILE | B | 21 | 66.554 | 61.281 | 47.302 | 1.00 | 22.41 |
| C    |     |     |     |   |    |        |        |        |      |       |
| ATOM | 151 | CD1 | ILE | B | 21 | 67.982 | 62.363 | 49.866 | 1.00 | 22.41 |
| C    |     |     |     |   |    |        |        |        |      |       |
| ATOM | 152 | N   | THR | B | 22 | 64.557 | 62.790 | 45.063 | 1.00 | 22.40 |
| N    |     |     |     |   |    |        |        |        |      |       |
| ATOM | 153 | CA  | THR | B | 22 | 63.312 | 62.449 | 44.393 | 1.00 | 22.40 |
| C    |     |     |     |   |    |        |        |        |      |       |
| ATOM | 154 | C   | THR | B | 22 | 63.188 | 60.938 | 44.269 | 1.00 | 22.40 |
| C    |     |     |     |   |    |        |        |        |      |       |
| ATOM | 155 | O   | THR | B | 22 | 64.160 | 60.251 | 43.951 | 1.00 | 22.40 |
| O    |     |     |     |   |    |        |        |        |      |       |
| ATOM | 156 | CB  | THR | B | 22 | 63.233 | 63.090 | 43.003 | 1.00 | 22.40 |
| C    |     |     |     |   |    |        |        |        |      |       |
| ATOM | 157 | OG1 | THR | B | 22 | 63.454 | 64.498 | 43.113 | 1.00 | 22.40 |
| O    |     |     |     |   |    |        |        |        |      |       |
| ATOM | 158 | CG2 | THR | B | 22 | 61.870 | 62.852 | 42.380 | 1.00 | 22.40 |
| C    |     |     |     |   |    |        |        |        |      |       |
| ATOM | 159 | N   | CYS | B | 23 | 61.991 | 60.425 | 44.529 | 1.00 | 20.48 |
| N    |     |     |     |   |    |        |        |        |      |       |
| ATOM | 160 | CA  | CYS | B | 23 | 61.675 | 59.018 | 44.348 | 1.00 | 20.48 |
| C    |     |     |     |   |    |        |        |        |      |       |
| ATOM | 161 | C   | CYS | B | 23 | 60.459 | 58.914 | 43.436 | 1.00 | 20.48 |
| C    |     |     |     |   |    |        |        |        |      |       |
| ATOM | 162 | O   | CYS | B | 23 | 59.520 | 59.703 | 43.548 | 1.00 | 20.48 |
| O    |     |     |     |   |    |        |        |        |      |       |
| ATOM | 163 | CB  | CYS | B | 23 | 61.427 | 58.326 | 45.714 | 1.00 | 20.48 |
| C    |     |     |     |   |    |        |        |        |      |       |
| ATOM | 164 | SG  | CYS | B | 23 | 60.966 | 56.566 | 45.638 | 1.00 | 20.48 |
| S    |     |     |     |   |    |        |        |        |      |       |
| ATOM | 165 | N   | ARG | B | 24 | 60.491 | 57.963 | 42.513 | 1.00 | 23.16 |
| N    |     |     |     |   |    |        |        |        |      |       |
| ATOM | 166 | CA  | ARG | B | 24 | 59.438 | 57.792 | 41.525 | 1.00 | 23.16 |
| C    |     |     |     |   |    |        |        |        |      |       |
| ATOM | 167 | C   | ARG | B | 24 | 58.980 | 56.344 | 41.511 | 1.00 | 23.16 |

|      |     |     |     |   |    |        |        |        |      |       |
|------|-----|-----|-----|---|----|--------|--------|--------|------|-------|
| C    |     |     |     |   |    |        |        |        |      |       |
| ATOM | 168 | O   | ARG | B | 24 | 59.787 | 55.423 | 41.667 | 1.00 | 23.16 |
| O    |     |     |     |   |    |        |        |        |      |       |
| ATOM | 169 | CB  | ARG | B | 24 | 59.908 | 58.199 | 40.117 | 1.00 | 23.16 |
| C    |     |     |     |   |    |        |        |        |      |       |
| ATOM | 170 | CG  | ARG | B | 24 | 60.462 | 59.605 | 40.028 | 1.00 | 23.16 |
| C    |     |     |     |   |    |        |        |        |      |       |
| ATOM | 171 | CD  | ARG | B | 24 | 60.433 | 60.139 | 38.606 | 1.00 | 23.16 |
| C    |     |     |     |   |    |        |        |        |      |       |
| ATOM | 172 | NE  | ARG | B | 24 | 60.600 | 61.587 | 38.585 | 1.00 | 23.16 |
| N    |     |     |     |   |    |        |        |        |      |       |
| ATOM | 173 | CZ  | ARG | B | 24 | 61.776 | 62.197 | 38.493 | 1.00 | 23.16 |
| C    |     |     |     |   |    |        |        |        |      |       |
| ATOM | 174 | NH1 | ARG | B | 24 | 62.888 | 61.483 | 38.406 | 1.00 | 23.16 |
| N    |     |     |     |   |    |        |        |        |      |       |
| ATOM | 175 | NH2 | ARG | B | 24 | 61.839 | 63.520 | 38.486 | 1.00 | 23.16 |
| N    |     |     |     |   |    |        |        |        |      |       |
| ATOM | 176 | N   | ALA | B | 25 | 57.681 | 56.154 | 41.315 | 1.00 | 21.65 |
| N    |     |     |     |   |    |        |        |        |      |       |
| ATOM | 177 | CA  | ALA | B | 25 | 57.058 | 54.843 | 41.265 | 1.00 | 21.65 |
| C    |     |     |     |   |    |        |        |        |      |       |
| ATOM | 178 | C   | ALA | B | 25 | 56.542 | 54.569 | 39.859 | 1.00 | 21.65 |
| C    |     |     |     |   |    |        |        |        |      |       |
| ATOM | 179 | O   | ALA | B | 25 | 56.123 | 55.485 | 39.148 | 1.00 | 21.65 |
| O    |     |     |     |   |    |        |        |        |      |       |
| ATOM | 180 | CB  | ALA | B | 25 | 55.907 | 54.746 | 42.268 | 1.00 | 21.65 |
| C    |     |     |     |   |    |        |        |        |      |       |
| ATOM | 181 | N   | SER | B | 26 | 56.579 | 53.299 | 39.460 | 1.00 | 23.50 |
| N    |     |     |     |   |    |        |        |        |      |       |
| ATOM | 182 | CA  | SER | B | 26 | 56.119 | 52.933 | 38.124 | 1.00 | 23.50 |
| C    |     |     |     |   |    |        |        |        |      |       |
| ATOM | 183 | C   | SER | B | 26 | 54.600 | 52.955 | 38.008 | 1.00 | 23.50 |
| C    |     |     |     |   |    |        |        |        |      |       |
| ATOM | 184 | O   | SER | B | 26 | 54.072 | 53.187 | 36.916 | 1.00 | 23.50 |
| O    |     |     |     |   |    |        |        |        |      |       |
| ATOM | 185 | CB  | SER | B | 26 | 56.658 | 51.556 | 37.739 | 1.00 | 23.50 |
| C    |     |     |     |   |    |        |        |        |      |       |
| ATOM | 186 | OG  | SER | B | 26 | 56.140 | 50.545 | 38.578 | 1.00 | 23.50 |
| O    |     |     |     |   |    |        |        |        |      |       |
| ATOM | 187 | N   | GLN | B | 27 | 53.889 | 52.707 | 39.102 | 1.00 | 24.57 |
| N    |     |     |     |   |    |        |        |        |      |       |
| ATOM | 188 | CA  | GLN | B | 27 | 52.440 | 52.813 | 39.163 | 1.00 | 24.57 |
| C    |     |     |     |   |    |        |        |        |      |       |
| ATOM | 189 | C   | GLN | B | 27 | 52.069 | 53.724 | 40.321 | 1.00 | 24.57 |
| C    |     |     |     |   |    |        |        |        |      |       |
| ATOM | 190 | O   | GLN | B | 27 | 52.866 | 53.950 | 41.231 | 1.00 | 24.57 |
| O    |     |     |     |   |    |        |        |        |      |       |
| ATOM | 191 | CB  | GLN | B | 27 | 51.771 | 51.447 | 39.348 | 1.00 | 24.57 |
| C    |     |     |     |   |    |        |        |        |      |       |
| ATOM | 192 | CG  | GLN | B | 27 | 52.140 | 50.422 | 38.305 | 1.00 | 24.57 |

|      |     |     |     |   |    |        |        |        |      |       |
|------|-----|-----|-----|---|----|--------|--------|--------|------|-------|
| C    |     |     |     |   |    |        |        |        |      |       |
| ATOM | 193 | CD  | GLN | B | 27 | 51.716 | 50.840 | 36.917 | 1.00 | 24.57 |
| C    |     |     |     |   |    |        |        |        |      |       |
| ATOM | 194 | OE1 | GLN | B | 27 | 52.483 | 50.731 | 35.963 | 1.00 | 24.57 |
| O    |     |     |     |   |    |        |        |        |      |       |
| ATOM | 195 | NE2 | GLN | B | 27 | 50.490 | 51.328 | 36.797 | 1.00 | 24.57 |
| N    |     |     |     |   |    |        |        |        |      |       |
| ATOM | 196 | N   | SER | B | 28 | 50.847 | 54.246 | 40.287 | 1.00 | 21.25 |
| N    |     |     |     |   |    |        |        |        |      |       |
| ATOM | 197 | CA  | SER | B | 28 | 50.397 | 55.157 | 41.330 | 1.00 | 21.25 |
| C    |     |     |     |   |    |        |        |        |      |       |
| ATOM | 198 | C   | SER | B | 28 | 50.166 | 54.407 | 42.639 | 1.00 | 21.25 |
| C    |     |     |     |   |    |        |        |        |      |       |
| ATOM | 199 | O   | SER | B | 28 | 49.512 | 53.364 | 42.663 | 1.00 | 21.25 |
| O    |     |     |     |   |    |        |        |        |      |       |
| ATOM | 200 | CB  | SER | B | 28 | 49.121 | 55.868 | 40.889 | 1.00 | 21.25 |
| C    |     |     |     |   |    |        |        |        |      |       |
| ATOM | 201 | OG  | SER | B | 28 | 48.684 | 56.780 | 41.874 | 1.00 | 21.25 |
| O    |     |     |     |   |    |        |        |        |      |       |
| ATOM | 202 | N   | ILE | B | 29 | 50.715 | 54.945 | 43.729 | 1.00 | 17.66 |
| N    |     |     |     |   |    |        |        |        |      |       |
| ATOM | 203 | CA  | ILE | B | 29 | 50.686 | 54.327 | 45.055 | 1.00 | 17.66 |
| C    |     |     |     |   |    |        |        |        |      |       |
| ATOM | 204 | C   | ILE | B | 29 | 50.059 | 55.272 | 46.071 | 1.00 | 17.66 |
| C    |     |     |     |   |    |        |        |        |      |       |
| ATOM | 205 | O   | ILE | B | 29 | 50.452 | 55.281 | 47.238 | 1.00 | 17.66 |
| O    |     |     |     |   |    |        |        |        |      |       |
| ATOM | 206 | CB  | ILE | B | 29 | 52.096 | 53.909 | 45.514 | 1.00 | 17.66 |
| C    |     |     |     |   |    |        |        |        |      |       |
| ATOM | 207 | CG1 | ILE | B | 29 | 53.069 | 55.085 | 45.414 | 1.00 | 17.66 |
| C    |     |     |     |   |    |        |        |        |      |       |
| ATOM | 208 | CG2 | ILE | B | 29 | 52.585 | 52.722 | 44.714 | 1.00 | 17.66 |
| C    |     |     |     |   |    |        |        |        |      |       |
| ATOM | 209 | CD1 | ILE | B | 29 | 54.386 | 54.839 | 46.113 | 1.00 | 17.66 |
| C    |     |     |     |   |    |        |        |        |      |       |
| ATOM | 210 | N   | SER | B | 30 | 49.006 | 55.981 | 45.681 | 1.00 | 18.78 |
| N    |     |     |     |   |    |        |        |        |      |       |
| ATOM | 211 | CA  | SER | B | 30 | 48.857 | 57.418 | 45.871 | 1.00 | 18.78 |
| C    |     |     |     |   |    |        |        |        |      |       |
| ATOM | 212 | C   | SER | B | 30 | 49.615 | 58.092 | 47.015 | 1.00 | 18.78 |
| C    |     |     |     |   |    |        |        |        |      |       |
| ATOM | 213 | O   | SER | B | 30 | 50.496 | 58.903 | 46.733 | 1.00 | 18.78 |
| O    |     |     |     |   |    |        |        |        |      |       |
| ATOM | 214 | CB  | SER | B | 30 | 47.366 | 57.706 | 46.051 | 1.00 | 18.78 |
| C    |     |     |     |   |    |        |        |        |      |       |
| ATOM | 215 | OG  | SER | B | 30 | 46.929 | 57.324 | 47.344 | 1.00 | 18.78 |
| O    |     |     |     |   |    |        |        |        |      |       |
| ATOM | 216 | N   | ASN | B | 31 | 49.348 | 57.795 | 48.283 | 1.00 | 17.25 |
| N    |     |     |     |   |    |        |        |        |      |       |
| ATOM | 217 | CA  | ASN | B | 31 | 50.109 | 58.442 | 49.351 | 1.00 | 17.25 |

|      |     |     |     |   |    |        |        |        |      |       |
|------|-----|-----|-----|---|----|--------|--------|--------|------|-------|
| C    |     |     |     |   |    |        |        |        |      |       |
| ATOM | 218 | C   | ASN | B | 31 | 50.935 | 57.458 | 50.166 | 1.00 | 17.25 |
| C    |     |     |     |   |    |        |        |        |      |       |
| ATOM | 219 | O   | ASN | B | 31 | 51.562 | 57.860 | 51.149 | 1.00 | 17.25 |
| O    |     |     |     |   |    |        |        |        |      |       |
| ATOM | 220 | CB  | ASN | B | 31 | 49.195 | 59.229 | 50.296 | 1.00 | 17.25 |
| C    |     |     |     |   |    |        |        |        |      |       |
| ATOM | 221 | CG  | ASN | B | 31 | 48.640 | 60.491 | 49.665 | 1.00 | 17.25 |
| C    |     |     |     |   |    |        |        |        |      |       |
| ATOM | 222 | OD1 | ASN | B | 31 | 49.220 | 61.046 | 48.740 | 1.00 | 17.25 |
| O    |     |     |     |   |    |        |        |        |      |       |
| ATOM | 223 | ND2 | ASN | B | 31 | 47.508 | 60.948 | 50.170 | 1.00 | 17.25 |
| N    |     |     |     |   |    |        |        |        |      |       |
| ATOM | 224 | N   | TRP | B | 32 | 50.962 | 56.188 | 49.780 | 1.00 | 13.87 |
| N    |     |     |     |   |    |        |        |        |      |       |
| ATOM | 225 | CA  | TRP | B | 32 | 51.457 | 55.130 | 50.659 | 1.00 | 13.87 |
| C    |     |     |     |   |    |        |        |        |      |       |
| ATOM | 226 | C   | TRP | B | 32 | 52.948 | 54.877 | 50.416 | 1.00 | 13.87 |
| C    |     |     |     |   |    |        |        |        |      |       |
| ATOM | 227 | O   | TRP | B | 32 | 53.368 | 53.836 | 49.918 | 1.00 | 13.87 |
| O    |     |     |     |   |    |        |        |        |      |       |
| ATOM | 228 | CB  | TRP | B | 32 | 50.623 | 53.870 | 50.468 | 1.00 | 13.87 |
| C    |     |     |     |   |    |        |        |        |      |       |
| ATOM | 229 | CG  | TRP | B | 32 | 49.130 | 54.121 | 50.329 | 1.00 | 13.87 |
| C    |     |     |     |   |    |        |        |        |      |       |
| ATOM | 230 | CD1 | TRP | B | 32 | 48.294 | 53.542 | 49.426 | 1.00 | 13.87 |
| C    |     |     |     |   |    |        |        |        |      |       |
| ATOM | 231 | CD2 | TRP | B | 32 | 48.315 | 55.001 | 51.121 | 1.00 | 13.87 |
| C    |     |     |     |   |    |        |        |        |      |       |
| ATOM | 232 | NE1 | TRP | B | 32 | 47.014 | 54.005 | 49.597 | 1.00 | 13.87 |
| N    |     |     |     |   |    |        |        |        |      |       |
| ATOM | 233 | CE2 | TRP | B | 32 | 47.000 | 54.902 | 50.630 | 1.00 | 13.87 |
| C    |     |     |     |   |    |        |        |        |      |       |
| ATOM | 234 | CE3 | TRP | B | 32 | 48.570 | 55.863 | 52.190 | 1.00 | 13.87 |
| C    |     |     |     |   |    |        |        |        |      |       |
| ATOM | 235 | CZ2 | TRP | B | 32 | 45.948 | 55.631 | 51.171 | 1.00 | 13.87 |
| C    |     |     |     |   |    |        |        |        |      |       |
| ATOM | 236 | CZ3 | TRP | B | 32 | 47.521 | 56.587 | 52.722 | 1.00 | 13.87 |
| C    |     |     |     |   |    |        |        |        |      |       |
| ATOM | 237 | CH2 | TRP | B | 32 | 46.227 | 56.465 | 52.211 | 1.00 | 13.87 |
| C    |     |     |     |   |    |        |        |        |      |       |
| ATOM | 238 | N   | LEU | B | 33 | 53.752 | 55.861 | 50.805 | 1.00 | 13.98 |
| N    |     |     |     |   |    |        |        |        |      |       |
| ATOM | 239 | CA  | LEU | B | 33 | 55.203 | 55.795 | 50.692 | 1.00 | 13.98 |
| C    |     |     |     |   |    |        |        |        |      |       |
| ATOM | 240 | C   | LEU | B | 33 | 55.836 | 56.246 | 51.999 | 1.00 | 13.98 |
| C    |     |     |     |   |    |        |        |        |      |       |
| ATOM | 241 | O   | LEU | B | 33 | 55.318 | 57.139 | 52.670 | 1.00 | 13.98 |
| O    |     |     |     |   |    |        |        |        |      |       |
| ATOM | 242 | CB  | LEU | B | 33 | 55.703 | 56.666 | 49.536 | 1.00 | 13.98 |

|      |     |     |     |   |    |        |        |        |      |       |
|------|-----|-----|-----|---|----|--------|--------|--------|------|-------|
| C    |     |     |     |   |    |        |        |        |      |       |
| ATOM | 243 | CG  | LEU | B | 33 | 57.209 | 56.700 | 49.266 | 1.00 | 13.98 |
| C    |     |     |     |   |    |        |        |        |      |       |
| ATOM | 244 | CD1 | LEU | B | 33 | 57.488 | 56.481 | 47.804 | 1.00 | 13.98 |
| C    |     |     |     |   |    |        |        |        |      |       |
| ATOM | 245 | CD2 | LEU | B | 33 | 57.812 | 58.010 | 49.730 | 1.00 | 13.98 |
| C    |     |     |     |   |    |        |        |        |      |       |
| ATOM | 246 | N   | ALA | B | 34 | 56.957 | 55.626 | 52.353 | 1.00 | 14.00 |
| N    |     |     |     |   |    |        |        |        |      |       |
| ATOM | 247 | CA  | ALA | B | 34 | 57.711 | 55.953 | 53.551 | 1.00 | 14.00 |
| C    |     |     |     |   |    |        |        |        |      |       |
| ATOM | 248 | C   | ALA | B | 34 | 59.162 | 56.217 | 53.172 | 1.00 | 14.00 |
| C    |     |     |     |   |    |        |        |        |      |       |
| ATOM | 249 | O   | ALA | B | 34 | 59.666 | 55.673 | 52.193 | 1.00 | 14.00 |
| O    |     |     |     |   |    |        |        |        |      |       |
| ATOM | 250 | CB  | ALA | B | 34 | 57.638 | 54.824 | 54.584 | 1.00 | 14.00 |
| C    |     |     |     |   |    |        |        |        |      |       |
| ATOM | 251 | N   | TRP | B | 35 | 59.818 | 57.071 | 53.951 | 1.00 | 16.39 |
| N    |     |     |     |   |    |        |        |        |      |       |
| ATOM | 252 | CA  | TRP | B | 35 | 61.216 | 57.440 | 53.755 | 1.00 | 16.39 |
| C    |     |     |     |   |    |        |        |        |      |       |
| ATOM | 253 | C   | TRP | B | 35 | 62.030 | 57.017 | 54.970 | 1.00 | 16.39 |
| C    |     |     |     |   |    |        |        |        |      |       |
| ATOM | 254 | O   | TRP | B | 35 | 61.693 | 57.397 | 56.099 | 1.00 | 16.39 |
| O    |     |     |     |   |    |        |        |        |      |       |
| ATOM | 255 | CB  | TRP | B | 35 | 61.387 | 58.950 | 53.562 | 1.00 | 16.39 |
| C    |     |     |     |   |    |        |        |        |      |       |
| ATOM | 256 | CG  | TRP | B | 35 | 60.992 | 59.519 | 52.241 | 1.00 | 16.39 |
| C    |     |     |     |   |    |        |        |        |      |       |
| ATOM | 257 | CD1 | TRP | B | 35 | 59.815 | 60.130 | 51.936 | 1.00 | 16.39 |
| C    |     |     |     |   |    |        |        |        |      |       |
| ATOM | 258 | CD2 | TRP | B | 35 | 61.800 | 59.596 | 51.064 | 1.00 | 16.39 |
| C    |     |     |     |   |    |        |        |        |      |       |
| ATOM | 259 | NE1 | TRP | B | 35 | 59.829 | 60.559 | 50.636 | 1.00 | 16.39 |
| N    |     |     |     |   |    |        |        |        |      |       |
| ATOM | 260 | CE2 | TRP | B | 35 | 61.038 | 60.245 | 50.077 | 1.00 | 16.39 |
| C    |     |     |     |   |    |        |        |        |      |       |
| ATOM | 261 | CE3 | TRP | B | 35 | 63.090 | 59.167 | 50.744 | 1.00 | 16.39 |
| C    |     |     |     |   |    |        |        |        |      |       |
| ATOM | 262 | CZ2 | TRP | B | 35 | 61.522 | 60.475 | 48.797 | 1.00 | 16.39 |
| C    |     |     |     |   |    |        |        |        |      |       |
| ATOM | 263 | CZ3 | TRP | B | 35 | 63.567 | 59.397 | 49.473 | 1.00 | 16.39 |
| C    |     |     |     |   |    |        |        |        |      |       |
| ATOM | 264 | CH2 | TRP | B | 35 | 62.786 | 60.046 | 48.516 | 1.00 | 16.39 |
| C    |     |     |     |   |    |        |        |        |      |       |
| ATOM | 265 | N   | PHE | B | 36 | 63.129 | 56.295 | 54.711 | 1.00 | 17.41 |
| N    |     |     |     |   |    |        |        |        |      |       |
| ATOM | 266 | CA  | PHE | B | 36 | 64.059 | 55.768 | 55.702 | 1.00 | 17.41 |
| C    |     |     |     |   |    |        |        |        |      |       |
| ATOM | 267 | C   | PHE | B | 36 | 65.449 | 56.356 | 55.499 | 1.00 | 17.41 |

|      |     |     |     |   |    |        |        |        |      |       |
|------|-----|-----|-----|---|----|--------|--------|--------|------|-------|
| C    |     |     |     |   |    |        |        |        |      |       |
| ATOM | 268 | O   | PHE | B | 36 | 65.845 | 56.677 | 54.380 | 1.00 | 17.41 |
| O    |     |     |     |   |    |        |        |        |      |       |
| ATOM | 269 | CB  | PHE | B | 36 | 64.195 | 54.244 | 55.605 | 1.00 | 17.41 |
| C    |     |     |     |   |    |        |        |        |      |       |
| ATOM | 270 | CG  | PHE | B | 36 | 62.944 | 53.497 | 55.901 | 1.00 | 17.41 |
| C    |     |     |     |   |    |        |        |        |      |       |
| ATOM | 271 | CD1 | PHE | B | 36 | 62.696 | 53.024 | 57.172 | 1.00 | 17.41 |
| C    |     |     |     |   |    |        |        |        |      |       |
| ATOM | 272 | CD2 | PHE | B | 36 | 62.028 | 53.234 | 54.903 | 1.00 | 17.41 |
| C    |     |     |     |   |    |        |        |        |      |       |
| ATOM | 273 | CE1 | PHE | B | 36 | 61.553 | 52.322 | 57.445 | 1.00 | 17.41 |
| C    |     |     |     |   |    |        |        |        |      |       |
| ATOM | 274 | CE2 | PHE | B | 36 | 60.882 | 52.535 | 55.175 | 1.00 | 17.41 |
| C    |     |     |     |   |    |        |        |        |      |       |
| ATOM | 275 | CZ  | PHE | B | 36 | 60.645 | 52.079 | 56.443 | 1.00 | 17.41 |
| C    |     |     |     |   |    |        |        |        |      |       |
| ATOM | 276 | N   | GLN | B | 37 | 66.200 | 56.441 | 56.592 | 1.00 | 22.43 |
| N    |     |     |     |   |    |        |        |        |      |       |
| ATOM | 277 | CA  | GLN | B | 37 | 67.602 | 56.832 | 56.584 | 1.00 | 22.43 |
| C    |     |     |     |   |    |        |        |        |      |       |
| ATOM | 278 | C   | GLN | B | 37 | 68.419 | 55.695 | 57.181 | 1.00 | 22.43 |
| C    |     |     |     |   |    |        |        |        |      |       |
| ATOM | 279 | O   | GLN | B | 37 | 68.020 | 55.118 | 58.193 | 1.00 | 22.43 |
| O    |     |     |     |   |    |        |        |        |      |       |
| ATOM | 280 | CB  | GLN | B | 37 | 67.803 | 58.120 | 57.391 | 1.00 | 22.43 |
| C    |     |     |     |   |    |        |        |        |      |       |
| ATOM | 281 | CG  | GLN | B | 37 | 69.240 | 58.530 | 57.635 | 1.00 | 22.43 |
| C    |     |     |     |   |    |        |        |        |      |       |
| ATOM | 282 | CD  | GLN | B | 37 | 69.346 | 59.619 | 58.684 | 1.00 | 22.43 |
| C    |     |     |     |   |    |        |        |        |      |       |
| ATOM | 283 | OE1 | GLN | B | 37 | 69.059 | 59.395 | 59.854 | 1.00 | 22.43 |
| O    |     |     |     |   |    |        |        |        |      |       |
| ATOM | 284 | NE2 | GLN | B | 37 | 69.736 | 60.812 | 58.261 | 1.00 | 22.43 |
| N    |     |     |     |   |    |        |        |        |      |       |
| ATOM | 285 | N   | GLN | B | 38 | 69.545 | 55.364 | 56.552 | 1.00 | 25.64 |
| N    |     |     |     |   |    |        |        |        |      |       |
| ATOM | 286 | CA  | GLN | B | 38 | 70.479 | 54.372 | 57.071 | 1.00 | 25.64 |
| C    |     |     |     |   |    |        |        |        |      |       |
| ATOM | 287 | C   | GLN | B | 38 | 71.868 | 54.987 | 57.124 | 1.00 | 25.64 |
| C    |     |     |     |   |    |        |        |        |      |       |
| ATOM | 288 | O   | GLN | B | 38 | 72.418 | 55.374 | 56.088 | 1.00 | 25.64 |
| O    |     |     |     |   |    |        |        |        |      |       |
| ATOM | 289 | CB  | GLN | B | 38 | 70.500 | 53.103 | 56.215 | 1.00 | 25.64 |
| C    |     |     |     |   |    |        |        |        |      |       |
| ATOM | 290 | CG  | GLN | B | 38 | 71.401 | 52.010 | 56.789 | 1.00 | 25.64 |
| C    |     |     |     |   |    |        |        |        |      |       |
| ATOM | 291 | CD  | GLN | B | 38 | 71.343 | 50.720 | 56.005 | 1.00 | 25.64 |
| C    |     |     |     |   |    |        |        |        |      |       |
| ATOM | 292 | OE1 | GLN | B | 38 | 71.175 | 50.726 | 54.793 | 1.00 | 25.64 |

|      |     |     |     |   |    |        |        |        |      |       |
|------|-----|-----|-----|---|----|--------|--------|--------|------|-------|
| O    |     |     |     |   |    |        |        |        |      |       |
| ATOM | 293 | NE2 | GLN | B | 38 | 71.489 | 49.602 | 56.699 | 1.00 | 25.64 |
| N    |     |     |     |   |    |        |        |        |      |       |
| ATOM | 294 | N   | LYS | B | 39 | 72.425 | 55.068 | 58.322 | 1.00 | 33.81 |
| N    |     |     |     |   |    |        |        |        |      |       |
| ATOM | 295 | CA  | LYS | B | 39 | 73.792 | 55.513 | 58.521 | 1.00 | 33.81 |
| C    |     |     |     |   |    |        |        |        |      |       |
| ATOM | 296 | C   | LYS | B | 39 | 74.757 | 54.352 | 58.310 | 1.00 | 33.81 |
| C    |     |     |     |   |    |        |        |        |      |       |
| ATOM | 297 | O   | LYS | B | 39 | 74.373 | 53.188 | 58.425 | 1.00 | 33.81 |
| O    |     |     |     |   |    |        |        |        |      |       |
| ATOM | 298 | CB  | LYS | B | 39 | 73.948 | 56.086 | 59.921 | 1.00 | 33.81 |
| C    |     |     |     |   |    |        |        |        |      |       |
| ATOM | 299 | CG  | LYS | B | 39 | 73.227 | 57.395 | 60.116 | 1.00 | 33.81 |
| C    |     |     |     |   |    |        |        |        |      |       |
| ATOM | 300 | CD  | LYS | B | 39 | 73.240 | 57.808 | 61.567 | 1.00 | 33.81 |
| C    |     |     |     |   |    |        |        |        |      |       |
| ATOM | 301 | CE  | LYS | B | 39 | 72.353 | 59.012 | 61.804 | 1.00 | 33.81 |
| C    |     |     |     |   |    |        |        |        |      |       |
| ATOM | 302 | NZ  | LYS | B | 39 | 72.598 | 59.604 | 63.143 | 1.00 | 33.81 |
| N    |     |     |     |   |    |        |        |        |      |       |
| ATOM | 303 | N   | PRO | B | 40 | 76.017 | 54.640 | 57.981 | 1.00 | 37.75 |
| N    |     |     |     |   |    |        |        |        |      |       |
| ATOM | 304 | CA  | PRO | B | 40 | 76.991 | 53.555 | 57.774 | 1.00 | 37.75 |
| C    |     |     |     |   |    |        |        |        |      |       |
| ATOM | 305 | C   | PRO | B | 40 | 77.120 | 52.687 | 59.016 | 1.00 | 37.75 |
| C    |     |     |     |   |    |        |        |        |      |       |
| ATOM | 306 | O   | PRO | B | 40 | 77.411 | 53.173 | 60.109 | 1.00 | 37.75 |
| O    |     |     |     |   |    |        |        |        |      |       |
| ATOM | 307 | CB  | PRO | B | 40 | 78.299 | 54.292 | 57.460 | 1.00 | 37.75 |
| C    |     |     |     |   |    |        |        |        |      |       |
| ATOM | 308 | CG  | PRO | B | 40 | 77.979 | 55.729 | 57.361 | 1.00 | 37.75 |
| C    |     |     |     |   |    |        |        |        |      |       |
| ATOM | 309 | CD  | PRO | B | 40 | 76.525 | 55.955 | 57.561 | 1.00 | 37.75 |
| C    |     |     |     |   |    |        |        |        |      |       |
| ATOM | 310 | N   | GLY | B | 41 | 76.876 | 51.391 | 58.841 | 1.00 | 38.67 |
| N    |     |     |     |   |    |        |        |        |      |       |
| ATOM | 311 | CA  | GLY | B | 41 | 77.014 | 50.433 | 59.917 | 1.00 | 38.67 |
| C    |     |     |     |   |    |        |        |        |      |       |
| ATOM | 312 | C   | GLY | B | 41 | 75.872 | 50.377 | 60.906 | 1.00 | 38.67 |
| C    |     |     |     |   |    |        |        |        |      |       |
| ATOM | 313 | O   | GLY | B | 41 | 76.010 | 49.719 | 61.942 | 1.00 | 38.67 |
| O    |     |     |     |   |    |        |        |        |      |       |
| ATOM | 314 | N   | LYS | B | 42 | 74.750 | 51.032 | 60.628 | 1.00 | 36.67 |
| N    |     |     |     |   |    |        |        |        |      |       |
| ATOM | 315 | CA  | LYS | B | 42 | 73.608 | 51.048 | 61.529 | 1.00 | 36.67 |
| C    |     |     |     |   |    |        |        |        |      |       |
| ATOM | 316 | C   | LYS | B | 42 | 72.380 | 50.480 | 60.828 | 1.00 | 36.67 |
| C    |     |     |     |   |    |        |        |        |      |       |
| ATOM | 317 | O   | LYS | B | 42 | 72.401 | 50.166 | 59.637 | 1.00 | 36.67 |

|      |     |    |     |   |    |        |        |        |      |       |
|------|-----|----|-----|---|----|--------|--------|--------|------|-------|
| O    |     |    |     |   |    |        |        |        |      |       |
| ATOM | 318 | CB | LYS | B | 42 | 73.319 | 52.467 | 62.029 | 1.00 | 36.67 |
| C    |     |    |     |   |    |        |        |        |      |       |
| ATOM | 319 | CG | LYS | B | 42 | 74.490 | 53.149 | 62.706 | 1.00 | 36.67 |
| C    |     |    |     |   |    |        |        |        |      |       |
| ATOM | 320 | CD | LYS | B | 42 | 75.165 | 52.238 | 63.712 | 1.00 | 36.67 |
| C    |     |    |     |   |    |        |        |        |      |       |
| ATOM | 321 | CE | LYS | B | 42 | 75.625 | 53.024 | 64.921 | 1.00 | 36.67 |
| C    |     |    |     |   |    |        |        |        |      |       |
| ATOM | 322 | NZ | LYS | B | 42 | 74.587 | 54.001 | 65.341 | 1.00 | 36.67 |
| N    |     |    |     |   |    |        |        |        |      |       |
| ATOM | 323 | N  | ALA | B | 43 | 71.318 | 50.345 | 61.580 | 1.00 | 30.87 |
| N    |     |    |     |   |    |        |        |        |      |       |
| ATOM | 324 | CA | ALA | B | 43 | 70.055 | 49.856 | 61.052 | 1.00 | 30.87 |
| C    |     |    |     |   |    |        |        |        |      |       |
| ATOM | 325 | C  | ALA | B | 43 | 69.215 | 51.010 | 60.510 | 1.00 | 30.87 |
| C    |     |    |     |   |    |        |        |        |      |       |
| ATOM | 326 | O  | ALA | B | 43 | 69.321 | 52.139 | 60.993 | 1.00 | 30.87 |
| O    |     |    |     |   |    |        |        |        |      |       |
| ATOM | 327 | CB | ALA | B | 43 | 69.276 | 49.123 | 62.136 | 1.00 | 30.87 |
| C    |     |    |     |   |    |        |        |        |      |       |
| ATOM | 328 | N  | PRO | B | 44 | 68.370 | 50.750 | 59.510 | 1.00 | 27.80 |
| N    |     |    |     |   |    |        |        |        |      |       |
| ATOM | 329 | CA | PRO | B | 44 | 67.556 | 51.825 | 58.928 | 1.00 | 27.80 |
| C    |     |    |     |   |    |        |        |        |      |       |
| ATOM | 330 | C  | PRO | B | 44 | 66.643 | 52.479 | 59.951 | 1.00 | 27.80 |
| C    |     |    |     |   |    |        |        |        |      |       |
| ATOM | 331 | O  | PRO | B | 44 | 66.123 | 51.834 | 60.859 | 1.00 | 27.80 |
| O    |     |    |     |   |    |        |        |        |      |       |
| ATOM | 332 | CB | PRO | B | 44 | 66.743 | 51.108 | 57.847 | 1.00 | 27.80 |
| C    |     |    |     |   |    |        |        |        |      |       |
| ATOM | 333 | CG | PRO | B | 44 | 67.557 | 49.928 | 57.496 | 1.00 | 27.80 |
| C    |     |    |     |   |    |        |        |        |      |       |
| ATOM | 334 | CD | PRO | B | 44 | 68.223 | 49.493 | 58.761 | 1.00 | 27.80 |
| C    |     |    |     |   |    |        |        |        |      |       |
| ATOM | 335 | N  | LYS | B | 45 | 66.445 | 53.782 | 59.780 | 1.00 | 24.87 |
| N    |     |    |     |   |    |        |        |        |      |       |
| ATOM | 336 | CA | LYS | B | 45 | 65.607 | 54.582 | 60.658 | 1.00 | 24.87 |
| C    |     |    |     |   |    |        |        |        |      |       |
| ATOM | 337 | C  | LYS | B | 45 | 64.526 | 55.271 | 59.837 | 1.00 | 24.87 |
| C    |     |    |     |   |    |        |        |        |      |       |
| ATOM | 338 | O  | LYS | B | 45 | 64.821 | 55.854 | 58.791 | 1.00 | 24.87 |
| O    |     |    |     |   |    |        |        |        |      |       |
| ATOM | 339 | CB | LYS | B | 45 | 66.445 | 55.621 | 61.403 | 1.00 | 24.87 |
| C    |     |    |     |   |    |        |        |        |      |       |
| ATOM | 340 | CG | LYS | B | 45 | 65.664 | 56.424 | 62.404 | 1.00 | 24.87 |
| C    |     |    |     |   |    |        |        |        |      |       |
| ATOM | 341 | CD | LYS | B | 45 | 66.423 | 56.509 | 63.708 | 1.00 | 24.87 |
| C    |     |    |     |   |    |        |        |        |      |       |
| ATOM | 342 | CE | LYS | B | 45 | 66.634 | 55.121 | 64.283 | 1.00 | 24.87 |



|      |     |     |     |   |    |        |        |        |      |       |
|------|-----|-----|-----|---|----|--------|--------|--------|------|-------|
| C    |     |     |     |   |    |        |        |        |      |       |
| ATOM | 343 | NZ  | LYS | B | 45 | 65.352 | 54.397 | 64.480 | 1.00 | 24.87 |
| N    |     |     |     |   |    |        |        |        |      |       |
| ATOM | 344 | N   | LEU | B | 46 | 63.288 | 55.219 | 60.320 | 1.00 | 20.28 |
| N    |     |     |     |   |    |        |        |        |      |       |
| ATOM | 345 | CA  | LEU | B | 46 | 62.163 | 55.821 | 59.614 | 1.00 | 20.28 |
| C    |     |     |     |   |    |        |        |        |      |       |
| ATOM | 346 | C   | LEU | B | 46 | 62.141 | 57.330 | 59.822 | 1.00 | 20.28 |
| C    |     |     |     |   |    |        |        |        |      |       |
| ATOM | 347 | O   | LEU | B | 46 | 62.229 | 57.811 | 60.954 | 1.00 | 20.28 |
| O    |     |     |     |   |    |        |        |        |      |       |
| ATOM | 348 | CB  | LEU | B | 46 | 60.848 | 55.206 | 60.091 | 1.00 | 20.28 |
| C    |     |     |     |   |    |        |        |        |      |       |
| ATOM | 349 | CG  | LEU | B | 46 | 59.538 | 55.801 | 59.565 | 1.00 | 20.28 |
| C    |     |     |     |   |    |        |        |        |      |       |
| ATOM | 350 | CD1 | LEU | B | 46 | 59.406 | 55.613 | 58.063 | 1.00 | 20.28 |
| C    |     |     |     |   |    |        |        |        |      |       |
| ATOM | 351 | CD2 | LEU | B | 46 | 58.348 | 55.192 | 60.277 | 1.00 | 20.28 |
| C    |     |     |     |   |    |        |        |        |      |       |
| ATOM | 352 | N   | LEU | B | 47 | 62.025 | 58.075 | 58.725 | 1.00 | 20.64 |
| N    |     |     |     |   |    |        |        |        |      |       |
| ATOM | 353 | CA  | LEU | B | 47 | 61.926 | 59.527 | 58.775 | 1.00 | 20.64 |
| C    |     |     |     |   |    |        |        |        |      |       |
| ATOM | 354 | C   | LEU | B | 47 | 60.513 | 60.006 | 58.483 | 1.00 | 20.64 |
| C    |     |     |     |   |    |        |        |        |      |       |
| ATOM | 355 | O   | LEU | B | 47 | 59.909 | 60.696 | 59.304 | 1.00 | 20.64 |
| O    |     |     |     |   |    |        |        |        |      |       |
| ATOM | 356 | CB  | LEU | B | 47 | 62.886 | 60.177 | 57.774 | 1.00 | 20.64 |
| C    |     |     |     |   |    |        |        |        |      |       |
| ATOM | 357 | CG  | LEU | B | 47 | 64.384 | 59.942 | 57.866 | 1.00 | 20.64 |
| C    |     |     |     |   |    |        |        |        |      |       |
| ATOM | 358 | CD1 | LEU | B | 47 | 65.044 | 60.575 | 56.662 | 1.00 | 20.64 |
| C    |     |     |     |   |    |        |        |        |      |       |
| ATOM | 359 | CD2 | LEU | B | 47 | 64.918 | 60.526 | 59.150 | 1.00 | 20.64 |
| C    |     |     |     |   |    |        |        |        |      |       |
| ATOM | 360 | N   | ILE | B | 48 | 59.970 | 59.649 | 57.325 | 1.00 | 19.28 |
| N    |     |     |     |   |    |        |        |        |      |       |
| ATOM | 361 | CA  | ILE | B | 48 | 58.703 | 60.208 | 56.870 | 1.00 | 19.28 |
| C    |     |     |     |   |    |        |        |        |      |       |
| ATOM | 362 | C   | ILE | B | 48 | 57.730 | 59.069 | 56.628 | 1.00 | 19.28 |
| C    |     |     |     |   |    |        |        |        |      |       |
| ATOM | 363 | O   | ILE | B | 48 | 58.061 | 58.098 | 55.947 | 1.00 | 19.28 |
| O    |     |     |     |   |    |        |        |        |      |       |
| ATOM | 364 | CB  | ILE | B | 48 | 58.864 | 61.060 | 55.597 | 1.00 | 19.28 |
| C    |     |     |     |   |    |        |        |        |      |       |
| ATOM | 365 | CG1 | ILE | B | 48 | 59.941 | 62.132 | 55.788 | 1.00 | 19.28 |
| C    |     |     |     |   |    |        |        |        |      |       |
| ATOM | 366 | CG2 | ILE | B | 48 | 57.535 | 61.691 | 55.203 | 1.00 | 19.28 |
| C    |     |     |     |   |    |        |        |        |      |       |
| ATOM | 367 | CD1 | ILE | B | 48 | 59.493 | 63.316 | 56.579 | 1.00 | 19.28 |

|      |     |     |     |   |    |        |        |        |      |       |
|------|-----|-----|-----|---|----|--------|--------|--------|------|-------|
| C    |     |     |     |   |    |        |        |        |      |       |
| ATOM | 368 | N   | TYR | B | 49 | 56.544 | 59.193 | 57.182 | 1.00 | 21.29 |
| N    |     |     |     |   |    |        |        |        |      |       |
| ATOM | 369 | CA  | TYR | B | 49 | 55.462 | 58.252 | 56.990 | 1.00 | 21.29 |
| C    |     |     |     |   |    |        |        |        |      |       |
| ATOM | 370 | C   | TYR | B | 49 | 54.605 | 58.798 | 55.851 | 1.00 | 21.29 |
| C    |     |     |     |   |    |        |        |        |      |       |
| ATOM | 371 | O   | TYR | B | 49 | 55.101 | 59.604 | 55.063 | 1.00 | 21.29 |
| O    |     |     |     |   |    |        |        |        |      |       |
| ATOM | 372 | CB  | TYR | B | 49 | 54.766 | 58.043 | 58.328 | 1.00 | 21.29 |
| C    |     |     |     |   |    |        |        |        |      |       |
| ATOM | 373 | CG  | TYR | B | 49 | 53.857 | 56.862 | 58.362 | 1.00 | 21.29 |
| C    |     |     |     |   |    |        |        |        |      |       |
| ATOM | 374 | CD1 | TYR | B | 49 | 54.337 | 55.583 | 58.127 | 1.00 | 21.29 |
| C    |     |     |     |   |    |        |        |        |      |       |
| ATOM | 375 | CD2 | TYR | B | 49 | 52.527 | 57.016 | 58.688 | 1.00 | 21.29 |
| C    |     |     |     |   |    |        |        |        |      |       |
| ATOM | 376 | CE1 | TYR | B | 49 | 53.495 | 54.494 | 58.171 | 1.00 | 21.29 |
| C    |     |     |     |   |    |        |        |        |      |       |
| ATOM | 377 | CE2 | TYR | B | 49 | 51.683 | 55.940 | 58.742 | 1.00 | 21.29 |
| C    |     |     |     |   |    |        |        |        |      |       |
| ATOM | 378 | CZ  | TYR | B | 49 | 52.169 | 54.681 | 58.484 | 1.00 | 21.29 |
| C    |     |     |     |   |    |        |        |        |      |       |
| ATOM | 379 | OH  | TYR | B | 49 | 51.317 | 53.602 | 58.540 | 1.00 | 21.29 |
| O    |     |     |     |   |    |        |        |        |      |       |
| ATOM | 380 | N   | GLU | B | 50 | 53.337 | 58.371 | 55.747 | 1.00 | 21.08 |
| N    |     |     |     |   |    |        |        |        |      |       |
| ATOM | 381 | CA  | GLU | B | 50 | 52.485 | 58.657 | 54.586 | 1.00 | 21.08 |
| C    |     |     |     |   |    |        |        |        |      |       |
| ATOM | 382 | C   | GLU | B | 50 | 52.881 | 59.981 | 53.964 | 1.00 | 21.08 |
| C    |     |     |     |   |    |        |        |        |      |       |
| ATOM | 383 | O   | GLU | B | 50 | 52.876 | 61.011 | 54.643 | 1.00 | 21.08 |
| O    |     |     |     |   |    |        |        |        |      |       |
| ATOM | 384 | CB  | GLU | B | 50 | 51.001 | 58.741 | 54.969 | 1.00 | 21.08 |
| C    |     |     |     |   |    |        |        |        |      |       |
| ATOM | 385 | CG  | GLU | B | 50 | 50.437 | 57.573 | 55.727 | 1.00 | 21.08 |
| C    |     |     |     |   |    |        |        |        |      |       |
| ATOM | 386 | CD  | GLU | B | 50 | 49.091 | 57.885 | 56.353 | 1.00 | 21.08 |
| C    |     |     |     |   |    |        |        |        |      |       |
| ATOM | 387 | OE1 | GLU | B | 50 | 48.601 | 59.016 | 56.187 | 1.00 | 21.08 |
| O    |     |     |     |   |    |        |        |        |      |       |
| ATOM | 388 | OE2 | GLU | B | 50 | 48.525 | 56.994 | 57.000 | 1.00 | 21.08 |
| O    |     |     |     |   |    |        |        |        |      |       |
| ATOM | 389 | N   | ALA | B | 51 | 53.117 | 59.993 | 52.662 | 1.00 | 20.61 |
| N    |     |     |     |   |    |        |        |        |      |       |
| ATOM | 390 | CA  | ALA | B | 51 | 54.283 | 60.616 | 52.037 | 1.00 | 20.61 |
| C    |     |     |     |   |    |        |        |        |      |       |
| ATOM | 391 | C   | ALA | B | 51 | 54.784 | 61.940 | 52.618 | 1.00 | 20.61 |
| C    |     |     |     |   |    |        |        |        |      |       |
| ATOM | 392 | O   | ALA | B | 51 | 55.837 | 62.424 | 52.197 | 1.00 | 20.61 |

|      |     |     |     |   |    |        |        |        |      |       |
|------|-----|-----|-----|---|----|--------|--------|--------|------|-------|
| O    |     |     |     |   |    |        |        |        |      |       |
| ATOM | 393 | CB  | ALA | B | 51 | 53.974 | 60.827 | 50.556 | 1.00 | 20.61 |
| C    |     |     |     |   |    |        |        |        |      |       |
| ATOM | 394 | N   | SER | B | 52 | 54.057 | 62.559 | 53.550 | 1.00 | 23.74 |
| N    |     |     |     |   |    |        |        |        |      |       |
| ATOM | 395 | CA  | SER | B | 52 | 54.459 | 63.862 | 54.065 | 1.00 | 23.74 |
| C    |     |     |     |   |    |        |        |        |      |       |
| ATOM | 396 | C   | SER | B | 52 | 54.428 | 63.990 | 55.585 | 1.00 | 23.74 |
| C    |     |     |     |   |    |        |        |        |      |       |
| ATOM | 397 | O   | SER | B | 52 | 54.687 | 65.082 | 56.098 | 1.00 | 23.74 |
| O    |     |     |     |   |    |        |        |        |      |       |
| ATOM | 398 | CB  | SER | B | 52 | 53.577 | 64.955 | 53.459 | 1.00 | 23.74 |
| C    |     |     |     |   |    |        |        |        |      |       |
| ATOM | 399 | OG  | SER | B | 52 | 53.475 | 64.795 | 52.062 | 1.00 | 23.74 |
| O    |     |     |     |   |    |        |        |        |      |       |
| ATOM | 400 | N   | SER | B | 53 | 54.129 | 62.932 | 56.325 | 1.00 | 23.47 |
| N    |     |     |     |   |    |        |        |        |      |       |
| ATOM | 401 | CA  | SER | B | 53 | 53.956 | 63.036 | 57.769 | 1.00 | 23.47 |
| C    |     |     |     |   |    |        |        |        |      |       |
| ATOM | 402 | C   | SER | B | 53 | 55.263 | 62.698 | 58.478 | 1.00 | 23.47 |
| C    |     |     |     |   |    |        |        |        |      |       |
| ATOM | 403 | O   | SER | B | 53 | 55.761 | 61.574 | 58.368 | 1.00 | 23.47 |
| O    |     |     |     |   |    |        |        |        |      |       |
| ATOM | 404 | CB  | SER | B | 53 | 52.830 | 62.123 | 58.247 | 1.00 | 23.47 |
| C    |     |     |     |   |    |        |        |        |      |       |
| ATOM | 405 | OG  | SER | B | 53 | 52.673 | 62.218 | 59.647 | 1.00 | 23.47 |
| O    |     |     |     |   |    |        |        |        |      |       |
| ATOM | 406 | N   | LEU | B | 54 | 55.799 | 63.664 | 59.219 | 1.00 | 27.38 |
| N    |     |     |     |   |    |        |        |        |      |       |
| ATOM | 407 | CA  | LEU | B | 54 | 57.081 | 63.511 | 59.893 | 1.00 | 27.38 |
| C    |     |     |     |   |    |        |        |        |      |       |
| ATOM | 408 | C   | LEU | B | 54 | 56.929 | 62.704 | 61.175 | 1.00 | 27.38 |
| C    |     |     |     |   |    |        |        |        |      |       |
| ATOM | 409 | O   | LEU | B | 54 | 55.990 | 62.908 | 61.946 | 1.00 | 27.38 |
| O    |     |     |     |   |    |        |        |        |      |       |
| ATOM | 410 | CB  | LEU | B | 54 | 57.674 | 64.888 | 60.201 | 1.00 | 27.38 |
| C    |     |     |     |   |    |        |        |        |      |       |
| ATOM | 411 | CG  | LEU | B | 54 | 59.016 | 64.965 | 60.926 | 1.00 | 27.38 |
| C    |     |     |     |   |    |        |        |        |      |       |
| ATOM | 412 | CD1 | LEU | B | 54 | 60.134 | 64.505 | 60.024 | 1.00 | 27.38 |
| C    |     |     |     |   |    |        |        |        |      |       |
| ATOM | 413 | CD2 | LEU | B | 54 | 59.274 | 66.384 | 61.408 | 1.00 | 27.38 |
| C    |     |     |     |   |    |        |        |        |      |       |
| ATOM | 414 | N   | GLU | B | 55 | 57.862 | 61.785 | 61.404 | 1.00 | 29.65 |
| N    |     |     |     |   |    |        |        |        |      |       |
| ATOM | 415 | CA  | GLU | B | 55 | 57.807 | 60.912 | 62.567 | 1.00 | 29.65 |
| C    |     |     |     |   |    |        |        |        |      |       |
| ATOM | 416 | C   | GLU | B | 55 | 58.242 | 61.641 | 63.833 | 1.00 | 29.65 |
| C    |     |     |     |   |    |        |        |        |      |       |
| ATOM | 417 | O   | GLU | B | 55 | 59.009 | 62.604 | 63.790 | 1.00 | 29.65 |

|      |     |     |     |   |    |        |        |        |      |       |
|------|-----|-----|-----|---|----|--------|--------|--------|------|-------|
| O    |     |     |     |   |    |        |        |        |      |       |
| ATOM | 418 | CB  | GLU | B | 55 | 58.688 | 59.683 | 62.359 | 1.00 | 29.65 |
| C    |     |     |     |   |    |        |        |        |      |       |
| ATOM | 419 | CG  | GLU | B | 55 | 57.959 | 58.522 | 61.752 | 1.00 | 29.65 |
| C    |     |     |     |   |    |        |        |        |      |       |
| ATOM | 420 | CD  | GLU | B | 55 | 56.856 | 58.016 | 62.646 | 1.00 | 29.65 |
| C    |     |     |     |   |    |        |        |        |      |       |
| ATOM | 421 | OE1 | GLU | B | 55 | 55.677 | 58.188 | 62.280 | 1.00 | 29.65 |
| O    |     |     |     |   |    |        |        |        |      |       |
| ATOM | 422 | OE2 | GLU | B | 55 | 57.169 | 57.454 | 63.714 | 1.00 | 29.65 |
| O    |     |     |     |   |    |        |        |        |      |       |
| ATOM | 423 | N   | SER | B | 56 | 57.750 | 61.157 | 64.970 | 1.00 | 32.55 |
| N    |     |     |     |   |    |        |        |        |      |       |
| ATOM | 424 | CA  | SER | B | 56 | 58.068 | 61.778 | 66.248 | 1.00 | 32.55 |
| C    |     |     |     |   |    |        |        |        |      |       |
| ATOM | 425 | C   | SER | B | 56 | 59.507 | 61.483 | 66.644 | 1.00 | 32.55 |
| C    |     |     |     |   |    |        |        |        |      |       |
| ATOM | 426 | O   | SER | B | 56 | 59.999 | 60.365 | 66.481 | 1.00 | 32.55 |
| O    |     |     |     |   |    |        |        |        |      |       |
| ATOM | 427 | CB  | SER | B | 56 | 57.117 | 61.282 | 67.332 | 1.00 | 32.55 |
| C    |     |     |     |   |    |        |        |        |      |       |
| ATOM | 428 | OG  | SER | B | 56 | 57.548 | 60.040 | 67.850 | 1.00 | 32.55 |
| O    |     |     |     |   |    |        |        |        |      |       |
| ATOM | 429 | N   | GLY | B | 57 | 60.180 | 62.495 | 67.180 | 1.00 | 33.07 |
| N    |     |     |     |   |    |        |        |        |      |       |
| ATOM | 430 | CA  | GLY | B | 57 | 61.577 | 62.370 | 67.520 | 1.00 | 33.07 |
| C    |     |     |     |   |    |        |        |        |      |       |
| ATOM | 431 | C   | GLY | B | 57 | 62.533 | 62.623 | 66.380 | 1.00 | 33.07 |
| C    |     |     |     |   |    |        |        |        |      |       |
| ATOM | 432 | O   | GLY | B | 57 | 63.742 | 62.446 | 66.560 | 1.00 | 33.07 |
| O    |     |     |     |   |    |        |        |        |      |       |
| ATOM | 433 | N   | VAL | B | 58 | 62.036 | 63.023 | 65.215 | 1.00 | 31.11 |
| N    |     |     |     |   |    |        |        |        |      |       |
| ATOM | 434 | CA  | VAL | B | 58 | 62.878 | 63.326 | 64.062 | 1.00 | 31.11 |
| C    |     |     |     |   |    |        |        |        |      |       |
| ATOM | 435 | C   | VAL | B | 58 | 63.043 | 64.839 | 63.973 | 1.00 | 31.11 |
| C    |     |     |     |   |    |        |        |        |      |       |
| ATOM | 436 | O   | VAL | B | 58 | 62.062 | 65.574 | 64.136 | 1.00 | 31.11 |
| O    |     |     |     |   |    |        |        |        |      |       |
| ATOM | 437 | CB  | VAL | B | 58 | 62.280 | 62.744 | 62.770 | 1.00 | 31.11 |
| C    |     |     |     |   |    |        |        |        |      |       |
| ATOM | 438 | CG1 | VAL | B | 58 | 63.161 | 63.063 | 61.580 | 1.00 | 31.11 |
| C    |     |     |     |   |    |        |        |        |      |       |
| ATOM | 439 | CG2 | VAL | B | 58 | 62.095 | 61.246 | 62.906 | 1.00 | 31.11 |
| C    |     |     |     |   |    |        |        |        |      |       |
| ATOM | 440 | N   | PRO | B | 59 | 64.252 | 65.341 | 63.730 | 1.00 | 32.83 |
| N    |     |     |     |   |    |        |        |        |      |       |
| ATOM | 441 | CA  | PRO | B | 59 | 64.447 | 66.791 | 63.611 | 1.00 | 32.83 |
| C    |     |     |     |   |    |        |        |        |      |       |
| ATOM | 442 | C   | PRO | B | 59 | 63.606 | 67.401 | 62.500 | 1.00 | 32.83 |

|      |     |     |     |   |    |        |        |        |      |       |
|------|-----|-----|-----|---|----|--------|--------|--------|------|-------|
| C    |     |     |     |   |    |        |        |        |      |       |
| ATOM | 443 | O   | PRO | B | 59 | 63.350 | 66.781 | 61.468 | 1.00 | 32.83 |
| O    |     |     |     |   |    |        |        |        |      |       |
| ATOM | 444 | CB  | PRO | B | 59 | 65.942 | 66.915 | 63.307 | 1.00 | 32.83 |
| C    |     |     |     |   |    |        |        |        |      |       |
| ATOM | 445 | CG  | PRO | B | 59 | 66.537 | 65.732 | 63.963 | 1.00 | 32.83 |
| C    |     |     |     |   |    |        |        |        |      |       |
| ATOM | 446 | CD  | PRO | B | 59 | 65.533 | 64.623 | 63.822 | 1.00 | 32.83 |
| C    |     |     |     |   |    |        |        |        |      |       |
| ATOM | 447 | N   | SER | B | 60 | 63.188 | 68.645 | 62.723 | 1.00 | 34.91 |
| N    |     |     |     |   |    |        |        |        |      |       |
| ATOM | 448 | CA  | SER | B | 60 | 62.212 | 69.305 | 61.867 | 1.00 | 34.91 |
| C    |     |     |     |   |    |        |        |        |      |       |
| ATOM | 449 | C   | SER | B | 60 | 62.799 | 69.844 | 60.571 | 1.00 | 34.91 |
| C    |     |     |     |   |    |        |        |        |      |       |
| ATOM | 450 | O   | SER | B | 60 | 62.067 | 70.470 | 59.802 | 1.00 | 34.91 |
| O    |     |     |     |   |    |        |        |        |      |       |
| ATOM | 451 | CB  | SER | B | 60 | 61.534 | 70.446 | 62.628 | 1.00 | 34.91 |
| C    |     |     |     |   |    |        |        |        |      |       |
| ATOM | 452 | OG  | SER | B | 60 | 62.463 | 71.129 | 63.448 | 1.00 | 34.91 |
| O    |     |     |     |   |    |        |        |        |      |       |
| ATOM | 453 | N   | ARG | B | 61 | 64.086 | 69.633 | 60.303 | 1.00 | 33.76 |
| N    |     |     |     |   |    |        |        |        |      |       |
| ATOM | 454 | CA  | ARG | B | 61 | 64.614 | 70.042 | 59.010 | 1.00 | 33.76 |
| C    |     |     |     |   |    |        |        |        |      |       |
| ATOM | 455 | C   | ARG | B | 61 | 64.221 | 69.085 | 57.891 | 1.00 | 33.76 |
| C    |     |     |     |   |    |        |        |        |      |       |
| ATOM | 456 | O   | ARG | B | 61 | 64.312 | 69.457 | 56.720 | 1.00 | 33.76 |
| O    |     |     |     |   |    |        |        |        |      |       |
| ATOM | 457 | CB  | ARG | B | 61 | 66.138 | 70.189 | 59.065 | 1.00 | 33.76 |
| C    |     |     |     |   |    |        |        |        |      |       |
| ATOM | 458 | CG  | ARG | B | 61 | 66.894 | 69.051 | 59.721 | 1.00 | 33.76 |
| C    |     |     |     |   |    |        |        |        |      |       |
| ATOM | 459 | CD  | ARG | B | 61 | 68.383 | 69.362 | 59.751 | 1.00 | 33.76 |
| C    |     |     |     |   |    |        |        |        |      |       |
| ATOM | 460 | NE  | ARG | B | 61 | 69.203 | 68.207 | 60.094 | 1.00 | 33.76 |
| N    |     |     |     |   |    |        |        |        |      |       |
| ATOM | 461 | CZ  | ARG | B | 61 | 69.399 | 67.772 | 61.333 | 1.00 | 33.76 |
| C    |     |     |     |   |    |        |        |        |      |       |
| ATOM | 462 | NH1 | ARG | B | 61 | 68.834 | 68.395 | 62.354 | 1.00 | 33.76 |
| N    |     |     |     |   |    |        |        |        |      |       |
| ATOM | 463 | NH2 | ARG | B | 61 | 70.162 | 66.714 | 61.551 | 1.00 | 33.76 |
| N    |     |     |     |   |    |        |        |        |      |       |
| ATOM | 464 | N   | PHE | B | 62 | 63.762 | 67.880 | 58.220 | 1.00 | 29.38 |
| N    |     |     |     |   |    |        |        |        |      |       |
| ATOM | 465 | CA  | PHE | B | 62 | 63.317 | 66.918 | 57.220 | 1.00 | 29.38 |
| C    |     |     |     |   |    |        |        |        |      |       |
| ATOM | 466 | C   | PHE | B | 62 | 61.852 | 67.162 | 56.883 | 1.00 | 29.38 |
| C    |     |     |     |   |    |        |        |        |      |       |
| ATOM | 467 | O   | PHE | B | 62 | 61.013 | 67.255 | 57.781 | 1.00 | 29.38 |

|      |     |     |     |   |    |        |        |        |      |       |
|------|-----|-----|-----|---|----|--------|--------|--------|------|-------|
| O    |     |     |     |   |    |        |        |        |      |       |
| ATOM | 468 | CB  | PHE | B | 62 | 63.498 | 65.486 | 57.725 | 1.00 | 29.38 |
| C    |     |     |     |   |    |        |        |        |      |       |
| ATOM | 469 | CG  | PHE | B | 62 | 64.921 | 65.107 | 57.999 | 1.00 | 29.38 |
| C    |     |     |     |   |    |        |        |        |      |       |
| ATOM | 470 | CD1 | PHE | B | 62 | 65.738 | 64.655 | 56.984 | 1.00 | 29.38 |
| C    |     |     |     |   |    |        |        |        |      |       |
| ATOM | 471 | CD2 | PHE | B | 62 | 65.438 | 65.191 | 59.276 | 1.00 | 29.38 |
| C    |     |     |     |   |    |        |        |        |      |       |
| ATOM | 472 | CE1 | PHE | B | 62 | 67.043 | 64.303 | 57.236 | 1.00 | 29.38 |
| C    |     |     |     |   |    |        |        |        |      |       |
| ATOM | 473 | CE2 | PHE | B | 62 | 66.742 | 64.838 | 59.531 | 1.00 | 29.38 |
| C    |     |     |     |   |    |        |        |        |      |       |
| ATOM | 474 | CZ  | PHE | B | 62 | 67.544 | 64.397 | 58.509 | 1.00 | 29.38 |
| C    |     |     |     |   |    |        |        |        |      |       |
| ATOM | 475 | N   | SER | B | 63 | 61.547 | 67.264 | 55.594 | 1.00 | 26.49 |
| N    |     |     |     |   |    |        |        |        |      |       |
| ATOM | 476 | CA  | SER | B | 63 | 60.167 | 67.383 | 55.145 | 1.00 | 26.49 |
| C    |     |     |     |   |    |        |        |        |      |       |
| ATOM | 477 | C   | SER | B | 63 | 59.981 | 66.552 | 53.887 | 1.00 | 26.49 |
| C    |     |     |     |   |    |        |        |        |      |       |
| ATOM | 478 | O   | SER | B | 63 | 60.920 | 66.367 | 53.116 | 1.00 | 26.49 |
| O    |     |     |     |   |    |        |        |        |      |       |
| ATOM | 479 | CB  | SER | B | 63 | 59.781 | 68.846 | 54.885 | 1.00 | 26.49 |
| C    |     |     |     |   |    |        |        |        |      |       |
| ATOM | 480 | OG  | SER | B | 63 | 60.511 | 69.379 | 53.800 | 1.00 | 26.49 |
| O    |     |     |     |   |    |        |        |        |      |       |
| ATOM | 481 | N   | GLY | B | 64 | 58.773 | 66.030 | 53.691 | 1.00 | 23.79 |
| N    |     |     |     |   |    |        |        |        |      |       |
| ATOM | 482 | CA  | GLY | B | 64 | 58.477 | 65.242 | 52.518 | 1.00 | 23.79 |
| C    |     |     |     |   |    |        |        |        |      |       |
| ATOM | 483 | C   | GLY | B | 64 | 57.237 | 65.761 | 51.820 | 1.00 | 23.79 |
| C    |     |     |     |   |    |        |        |        |      |       |
| ATOM | 484 | O   | GLY | B | 64 | 56.408 | 66.449 | 52.410 | 1.00 | 23.79 |
| O    |     |     |     |   |    |        |        |        |      |       |
| ATOM | 485 | N   | SER | B | 65 | 57.122 | 65.419 | 50.543 | 1.00 | 22.21 |
| N    |     |     |     |   |    |        |        |        |      |       |
| ATOM | 486 | CA  | SER | B | 65 | 55.961 | 65.839 | 49.770 | 1.00 | 22.21 |
| C    |     |     |     |   |    |        |        |        |      |       |
| ATOM | 487 | C   | SER | B | 65 | 55.812 | 64.924 | 48.567 | 1.00 | 22.21 |
| C    |     |     |     |   |    |        |        |        |      |       |
| ATOM | 488 | O   | SER | B | 65 | 56.676 | 64.099 | 48.282 | 1.00 | 22.21 |
| O    |     |     |     |   |    |        |        |        |      |       |
| ATOM | 489 | CB  | SER | B | 65 | 56.075 | 67.305 | 49.337 | 1.00 | 22.21 |
| C    |     |     |     |   |    |        |        |        |      |       |
| ATOM | 490 | OG  | SER | B | 65 | 57.230 | 67.519 | 48.554 | 1.00 | 22.21 |
| O    |     |     |     |   |    |        |        |        |      |       |
| ATOM | 491 | N   | GLY | B | 66 | 54.697 | 65.074 | 47.870 | 1.00 | 21.12 |
| N    |     |     |     |   |    |        |        |        |      |       |
| ATOM | 492 | CA  | GLY | B | 66 | 54.432 | 64.325 | 46.660 | 1.00 | 21.12 |

|      |     |     |     |   |    |        |        |        |      |       |
|------|-----|-----|-----|---|----|--------|--------|--------|------|-------|
| C    |     |     |     |   |    |        |        |        |      |       |
| ATOM | 493 | C   | GLY | B | 66 | 53.255 | 63.381 | 46.818 | 1.00 | 21.12 |
| C    |     |     |     |   |    |        |        |        |      |       |
| ATOM | 494 | O   | GLY | B | 66 | 52.734 | 63.157 | 47.907 | 1.00 | 21.12 |
| O    |     |     |     |   |    |        |        |        |      |       |
| ATOM | 495 | N   | SER | B | 67 | 52.862 | 62.812 | 45.685 | 1.00 | 20.97 |
| N    |     |     |     |   |    |        |        |        |      |       |
| ATOM | 496 | CA  | SER | B | 67 | 51.684 | 61.956 | 45.646 | 1.00 | 20.97 |
| C    |     |     |     |   |    |        |        |        |      |       |
| ATOM | 497 | C   | SER | B | 67 | 51.631 | 61.274 | 44.293 | 1.00 | 20.97 |
| C    |     |     |     |   |    |        |        |        |      |       |
| ATOM | 498 | O   | SER | B | 67 | 52.193 | 61.762 | 43.313 | 1.00 | 20.97 |
| O    |     |     |     |   |    |        |        |        |      |       |
| ATOM | 499 | CB  | SER | B | 67 | 50.397 | 62.750 | 45.898 | 1.00 | 20.97 |
| C    |     |     |     |   |    |        |        |        |      |       |
| ATOM | 500 | OG  | SER | B | 67 | 49.294 | 61.885 | 46.081 | 1.00 | 20.97 |
| O    |     |     |     |   |    |        |        |        |      |       |
| ATOM | 501 | N   | GLY | B | 68 | 50.972 | 60.123 | 44.255 | 1.00 | 19.84 |
| N    |     |     |     |   |    |        |        |        |      |       |
| ATOM | 502 | CA  | GLY | B | 68 | 50.794 | 59.448 | 42.990 | 1.00 | 19.84 |
| C    |     |     |     |   |    |        |        |        |      |       |
| ATOM | 503 | C   | GLY | B | 68 | 52.002 | 58.648 | 42.560 | 1.00 | 19.84 |
| C    |     |     |     |   |    |        |        |        |      |       |
| ATOM | 504 | O   | GLY | B | 68 | 52.216 | 57.529 | 43.028 | 1.00 | 19.84 |
| O    |     |     |     |   |    |        |        |        |      |       |
| ATOM | 505 | N   | THR | B | 69 | 52.789 | 59.209 | 41.644 | 1.00 | 21.79 |
| N    |     |     |     |   |    |        |        |        |      |       |
| ATOM | 506 | CA  | THR | B | 69 | 53.972 | 58.547 | 41.121 | 1.00 | 21.79 |
| C    |     |     |     |   |    |        |        |        |      |       |
| ATOM | 507 | C   | THR | B | 69 | 55.263 | 59.304 | 41.392 | 1.00 | 21.79 |
| C    |     |     |     |   |    |        |        |        |      |       |
| ATOM | 508 | O   | THR | B | 69 | 56.332 | 58.812 | 41.025 | 1.00 | 21.79 |
| O    |     |     |     |   |    |        |        |        |      |       |
| ATOM | 509 | CB  | THR | B | 69 | 53.839 | 58.325 | 39.608 | 1.00 | 21.79 |
| C    |     |     |     |   |    |        |        |        |      |       |
| ATOM | 510 | OG1 | THR | B | 69 | 53.462 | 59.554 | 38.977 | 1.00 | 21.79 |
| O    |     |     |     |   |    |        |        |        |      |       |
| ATOM | 511 | CG2 | THR | B | 69 | 52.794 | 57.274 | 39.315 | 1.00 | 21.79 |
| C    |     |     |     |   |    |        |        |        |      |       |
| ATOM | 512 | N   | GLU | B | 70 | 55.205 | 60.477 | 42.014 | 1.00 | 23.06 |
| N    |     |     |     |   |    |        |        |        |      |       |
| ATOM | 513 | CA  | GLU | B | 70 | 56.387 | 61.294 | 42.248 | 1.00 | 23.06 |
| C    |     |     |     |   |    |        |        |        |      |       |
| ATOM | 514 | C   | GLU | B | 70 | 56.380 | 61.799 | 43.681 | 1.00 | 23.06 |
| C    |     |     |     |   |    |        |        |        |      |       |
| ATOM | 515 | O   | GLU | B | 70 | 55.373 | 62.346 | 44.148 | 1.00 | 23.06 |
| O    |     |     |     |   |    |        |        |        |      |       |
| ATOM | 516 | CB  | GLU | B | 70 | 56.441 | 62.472 | 41.271 | 1.00 | 23.06 |
| C    |     |     |     |   |    |        |        |        |      |       |
| ATOM | 517 | CG  | GLU | B | 70 | 57.774 | 63.189 | 41.221 | 1.00 | 23.06 |

|      |     |     |     |   |    |        |        |        |      |       |
|------|-----|-----|-----|---|----|--------|--------|--------|------|-------|
| C    |     |     |     |   |    |        |        |        |      |       |
| ATOM | 518 | CD  | GLU | B | 70 | 58.134 | 63.644 | 39.818 | 1.00 | 23.06 |
| C    |     |     |     |   |    |        |        |        |      |       |
| ATOM | 519 | OE1 | GLU | B | 70 | 57.215 | 64.014 | 39.060 | 1.00 | 23.06 |
| O    |     |     |     |   |    |        |        |        |      |       |
| ATOM | 520 | OE2 | GLU | B | 70 | 59.330 | 63.635 | 39.473 | 1.00 | 23.06 |
| O    |     |     |     |   |    |        |        |        |      |       |
| ATOM | 521 | N   | PHE | B | 71 | 57.505 | 61.619 | 44.374 | 1.00 | 18.78 |
| N    |     |     |     |   |    |        |        |        |      |       |
| ATOM | 522 | CA  | PHE | B | 71 | 57.642 | 61.978 | 45.773 | 1.00 | 18.78 |
| C    |     |     |     |   |    |        |        |        |      |       |
| ATOM | 523 | C   | PHE | B | 71 | 59.012 | 62.604 | 45.981 | 1.00 | 18.78 |
| C    |     |     |     |   |    |        |        |        |      |       |
| ATOM | 524 | O   | PHE | B | 71 | 59.954 | 62.305 | 45.250 | 1.00 | 18.78 |
| O    |     |     |     |   |    |        |        |        |      |       |
| ATOM | 525 | CB  | PHE | B | 71 | 57.474 | 60.746 | 46.682 | 1.00 | 18.78 |
| C    |     |     |     |   |    |        |        |        |      |       |
| ATOM | 526 | CG  | PHE | B | 71 | 56.192 | 59.995 | 46.458 | 1.00 | 18.78 |
| C    |     |     |     |   |    |        |        |        |      |       |
| ATOM | 527 | CD1 | PHE | B | 71 | 55.096 | 60.221 | 47.265 | 1.00 | 18.78 |
| C    |     |     |     |   |    |        |        |        |      |       |
| ATOM | 528 | CD2 | PHE | B | 71 | 56.085 | 59.060 | 45.446 | 1.00 | 18.78 |
| C    |     |     |     |   |    |        |        |        |      |       |
| ATOM | 529 | CE1 | PHE | B | 71 | 53.921 | 59.537 | 47.062 | 1.00 | 18.78 |
| C    |     |     |     |   |    |        |        |        |      |       |
| ATOM | 530 | CE2 | PHE | B | 71 | 54.907 | 58.377 | 45.240 | 1.00 | 18.78 |
| C    |     |     |     |   |    |        |        |        |      |       |
| ATOM | 531 | CZ  | PHE | B | 71 | 53.828 | 58.617 | 46.052 | 1.00 | 18.78 |
| C    |     |     |     |   |    |        |        |        |      |       |
| ATOM | 532 | N   | THR | B | 72 | 59.121 | 63.472 | 46.979 | 1.00 | 20.60 |
| N    |     |     |     |   |    |        |        |        |      |       |
| ATOM | 533 | CA  | THR | B | 72 | 60.372 | 64.153 | 47.268 | 1.00 | 20.60 |
| C    |     |     |     |   |    |        |        |        |      |       |
| ATOM | 534 | C   | THR | B | 72 | 60.599 | 64.222 | 48.769 | 1.00 | 20.60 |
| C    |     |     |     |   |    |        |        |        |      |       |
| ATOM | 535 | O   | THR | B | 72 | 59.654 | 64.272 | 49.561 | 1.00 | 20.60 |
| O    |     |     |     |   |    |        |        |        |      |       |
| ATOM | 536 | CB  | THR | B | 72 | 60.407 | 65.581 | 46.697 | 1.00 | 20.60 |
| C    |     |     |     |   |    |        |        |        |      |       |
| ATOM | 537 | OG1 | THR | B | 72 | 59.210 | 66.272 | 47.064 | 1.00 | 20.60 |
| O    |     |     |     |   |    |        |        |        |      |       |
| ATOM | 538 | CG2 | THR | B | 72 | 60.526 | 65.552 | 45.192 | 1.00 | 20.60 |
| C    |     |     |     |   |    |        |        |        |      |       |
| ATOM | 539 | N   | LEU | B | 73 | 61.875 | 64.233 | 49.139 | 1.00 | 21.84 |
| N    |     |     |     |   |    |        |        |        |      |       |
| ATOM | 540 | CA  | LEU | B | 73 | 62.339 | 64.451 | 50.499 | 1.00 | 21.84 |
| C    |     |     |     |   |    |        |        |        |      |       |
| ATOM | 541 | C   | LEU | B | 73 | 63.331 | 65.606 | 50.476 | 1.00 | 21.84 |
| C    |     |     |     |   |    |        |        |        |      |       |
| ATOM | 542 | O   | LEU | B | 73 | 64.261 | 65.604 | 49.670 | 1.00 | 21.84 |



|      |     |     |     |   |    |        |        |        |      |       |
|------|-----|-----|-----|---|----|--------|--------|--------|------|-------|
| O    |     |     |     |   |    |        |        |        |      |       |
| ATOM | 543 | CB  | LEU | B | 73 | 62.995 | 63.181 | 51.060 | 1.00 | 21.84 |
| C    |     |     |     |   |    |        |        |        |      |       |
| ATOM | 544 | CG  | LEU | B | 73 | 63.826 | 63.285 | 52.337 | 1.00 | 21.84 |
| C    |     |     |     |   |    |        |        |        |      |       |
| ATOM | 545 | CD1 | LEU | B | 73 | 62.944 | 63.596 | 53.522 | 1.00 | 21.84 |
| C    |     |     |     |   |    |        |        |        |      |       |
| ATOM | 546 | CD2 | LEU | B | 73 | 64.605 | 62.003 | 52.578 | 1.00 | 21.84 |
| C    |     |     |     |   |    |        |        |        |      |       |
| ATOM | 547 | N   | THR | B | 74 | 63.135 | 66.589 | 51.347 | 1.00 | 27.83 |
| N    |     |     |     |   |    |        |        |        |      |       |
| ATOM | 548 | CA  | THR | B | 74 | 63.981 | 67.772 | 51.413 | 1.00 | 27.83 |
| C    |     |     |     |   |    |        |        |        |      |       |
| ATOM | 549 | C   | THR | B | 74 | 64.518 | 67.928 | 52.827 | 1.00 | 27.83 |
| C    |     |     |     |   |    |        |        |        |      |       |
| ATOM | 550 | O   | THR | B | 74 | 63.781 | 67.752 | 53.799 | 1.00 | 27.83 |
| O    |     |     |     |   |    |        |        |        |      |       |
| ATOM | 551 | CB  | THR | B | 74 | 63.202 | 69.029 | 51.000 | 1.00 | 27.83 |
| C    |     |     |     |   |    |        |        |        |      |       |
| ATOM | 552 | OG1 | THR | B | 74 | 62.720 | 68.874 | 49.662 | 1.00 | 27.83 |
| O    |     |     |     |   |    |        |        |        |      |       |
| ATOM | 553 | CG2 | THR | B | 74 | 64.093 | 70.254 | 51.062 | 1.00 | 27.83 |
| C    |     |     |     |   |    |        |        |        |      |       |
| ATOM | 554 | N   | ILE | B | 75 | 65.802 | 68.266 | 52.941 | 1.00 | 33.61 |
| N    |     |     |     |   |    |        |        |        |      |       |
| ATOM | 555 | CA  | ILE | B | 75 | 66.483 | 68.339 | 54.225 | 1.00 | 33.61 |
| C    |     |     |     |   |    |        |        |        |      |       |
| ATOM | 556 | C   | ILE | B | 75 | 66.746 | 69.782 | 54.653 | 1.00 | 33.61 |
| C    |     |     |     |   |    |        |        |        |      |       |
| ATOM | 557 | O   | ILE | B | 75 | 66.668 | 70.103 | 55.839 | 1.00 | 33.61 |
| O    |     |     |     |   |    |        |        |        |      |       |
| ATOM | 558 | CB  | ILE | B | 75 | 67.789 | 67.520 | 54.180 | 1.00 | 33.61 |
| C    |     |     |     |   |    |        |        |        |      |       |
| ATOM | 559 | CG1 | ILE | B | 75 | 67.486 | 66.095 | 53.698 | 1.00 | 33.61 |
| C    |     |     |     |   |    |        |        |        |      |       |
| ATOM | 560 | CG2 | ILE | B | 75 | 68.436 | 67.488 | 55.543 | 1.00 | 33.61 |
| C    |     |     |     |   |    |        |        |        |      |       |
| ATOM | 561 | CD1 | ILE | B | 75 | 68.670 | 65.175 | 53.712 | 1.00 | 33.61 |
| C    |     |     |     |   |    |        |        |        |      |       |
| ATOM | 562 | N   | SER | B | 76 | 67.105 | 70.645 | 53.714 | 1.00 | 40.69 |
| N    |     |     |     |   |    |        |        |        |      |       |
| ATOM | 563 | CA  | SER | B | 76 | 67.111 | 72.101 | 53.873 | 1.00 | 40.69 |
| C    |     |     |     |   |    |        |        |        |      |       |
| ATOM | 564 | C   | SER | B | 76 | 68.231 | 72.696 | 54.724 | 1.00 | 40.69 |
| C    |     |     |     |   |    |        |        |        |      |       |
| ATOM | 565 | O   | SER | B | 76 | 68.462 | 73.906 | 54.653 | 1.00 | 40.69 |
| O    |     |     |     |   |    |        |        |        |      |       |
| ATOM | 566 | CB  | SER | B | 76 | 65.776 | 72.574 | 54.462 | 1.00 | 40.69 |
| C    |     |     |     |   |    |        |        |        |      |       |
| ATOM | 567 | OG  | SER | B | 76 | 64.833 | 72.847 | 53.445 | 1.00 | 40.69 |

|      |     |     |     |   |    |        |        |        |      |       |
|------|-----|-----|-----|---|----|--------|--------|--------|------|-------|
| O    |     |     |     |   |    |        |        |        |      |       |
| ATOM | 568 | N   | SER | B | 77 | 68.944 | 71.890 | 55.510 | 1.00 | 41.56 |
| N    |     |     |     |   |    |        |        |        |      |       |
| ATOM | 569 | CA  | SER | B | 77 | 70.230 | 72.320 | 56.066 | 1.00 | 41.56 |
| C    |     |     |     |   |    |        |        |        |      |       |
| ATOM | 570 | C   | SER | B | 77 | 70.973 | 71.064 | 56.514 | 1.00 | 41.56 |
| C    |     |     |     |   |    |        |        |        |      |       |
| ATOM | 571 | O   | SER | B | 77 | 70.715 | 70.556 | 57.607 | 1.00 | 41.56 |
| O    |     |     |     |   |    |        |        |        |      |       |
| ATOM | 572 | CB  | SER | B | 77 | 70.049 | 73.298 | 57.215 | 1.00 | 41.56 |
| C    |     |     |     |   |    |        |        |        |      |       |
| ATOM | 573 | OG  | SER | B | 77 | 69.910 | 74.622 | 56.732 | 1.00 | 41.56 |
| O    |     |     |     |   |    |        |        |        |      |       |
| ATOM | 574 | N   | LEU | B | 78 | 71.896 | 70.592 | 55.688 | 1.00 | 41.36 |
| N    |     |     |     |   |    |        |        |        |      |       |
| ATOM | 575 | CA  | LEU | B | 78 | 72.614 | 69.372 | 56.019 | 1.00 | 41.36 |
| C    |     |     |     |   |    |        |        |        |      |       |
| ATOM | 576 | C   | LEU | B | 78 | 73.476 | 69.581 | 57.256 | 1.00 | 41.36 |
| C    |     |     |     |   |    |        |        |        |      |       |
| ATOM | 577 | O   | LEU | B | 78 | 74.199 | 70.574 | 57.364 | 1.00 | 41.36 |
| O    |     |     |     |   |    |        |        |        |      |       |
| ATOM | 578 | CB  | LEU | B | 78 | 73.481 | 68.934 | 54.843 | 1.00 | 41.36 |
| C    |     |     |     |   |    |        |        |        |      |       |
| ATOM | 579 | CG  | LEU | B | 78 | 72.888 | 67.915 | 53.878 | 1.00 | 41.36 |
| C    |     |     |     |   |    |        |        |        |      |       |
| ATOM | 580 | CD1 | LEU | B | 78 | 73.991 | 67.284 | 53.065 | 1.00 | 41.36 |
| C    |     |     |     |   |    |        |        |        |      |       |
| ATOM | 581 | CD2 | LEU | B | 78 | 72.111 | 66.852 | 54.618 | 1.00 | 41.36 |
| C    |     |     |     |   |    |        |        |        |      |       |
| ATOM | 582 | N   | GLN | B | 79 | 73.395 | 68.646 | 58.186 | 1.00 | 41.11 |
| N    |     |     |     |   |    |        |        |        |      |       |
| ATOM | 583 | CA  | GLN | B | 79 | 74.237 | 68.594 | 59.365 | 1.00 | 41.11 |
| C    |     |     |     |   |    |        |        |        |      |       |
| ATOM | 584 | C   | GLN | B | 79 | 75.222 | 67.440 | 59.249 | 1.00 | 41.11 |
| C    |     |     |     |   |    |        |        |        |      |       |
| ATOM | 585 | O   | GLN | B | 79 | 75.073 | 66.565 | 58.390 | 1.00 | 41.11 |
| O    |     |     |     |   |    |        |        |        |      |       |
| ATOM | 586 | CB  | GLN | B | 79 | 73.376 | 68.444 | 60.623 | 1.00 | 41.11 |
| C    |     |     |     |   |    |        |        |        |      |       |
| ATOM | 587 | CG  | GLN | B | 79 | 72.425 | 69.601 | 60.858 | 1.00 | 41.11 |
| C    |     |     |     |   |    |        |        |        |      |       |
| ATOM | 588 | CD  | GLN | B | 79 | 73.136 | 70.939 | 60.955 | 1.00 | 41.11 |
| C    |     |     |     |   |    |        |        |        |      |       |
| ATOM | 589 | OE1 | GLN | B | 79 | 72.912 | 71.834 | 60.143 | 1.00 | 41.11 |
| O    |     |     |     |   |    |        |        |        |      |       |
| ATOM | 590 | NE2 | GLN | B | 79 | 73.992 | 71.080 | 61.955 | 1.00 | 41.11 |
| N    |     |     |     |   |    |        |        |        |      |       |
| ATOM | 591 | N   | PRO | B | 80 | 76.266 | 67.417 | 60.083 | 1.00 | 42.90 |
| N    |     |     |     |   |    |        |        |        |      |       |
| ATOM | 592 | CA  | PRO | B | 80 | 77.250 | 66.328 | 59.979 | 1.00 | 42.90 |

|      |     |     |     |   |    |        |        |        |      |       |
|------|-----|-----|-----|---|----|--------|--------|--------|------|-------|
| C    |     |     |     |   |    |        |        |        |      |       |
| ATOM | 593 | C   | PRO | B | 80 | 76.664 | 64.938 | 60.155 | 1.00 | 42.90 |
| C    |     |     |     |   |    |        |        |        |      |       |
| ATOM | 594 | O   | PRO | B | 80 | 77.205 | 63.979 | 59.597 | 1.00 | 42.90 |
| O    |     |     |     |   |    |        |        |        |      |       |
| ATOM | 595 | CB  | PRO | B | 80 | 78.248 | 66.665 | 61.093 | 1.00 | 42.90 |
| C    |     |     |     |   |    |        |        |        |      |       |
| ATOM | 596 | CG  | PRO | B | 80 | 78.184 | 68.136 | 61.192 | 1.00 | 42.90 |
| C    |     |     |     |   |    |        |        |        |      |       |
| ATOM | 597 | CD  | PRO | B | 80 | 76.747 | 68.494 | 60.968 | 1.00 | 42.90 |
| C    |     |     |     |   |    |        |        |        |      |       |
| ATOM | 598 | N   | ASP | B | 81 | 75.581 | 64.795 | 60.912 | 1.00 | 43.30 |
| N    |     |     |     |   |    |        |        |        |      |       |
| ATOM | 599 | CA  | ASP | B | 81 | 74.966 | 63.491 | 61.120 | 1.00 | 43.30 |
| C    |     |     |     |   |    |        |        |        |      |       |
| ATOM | 600 | C   | ASP | B | 81 | 74.019 | 63.084 | 59.998 | 1.00 | 43.30 |
| C    |     |     |     |   |    |        |        |        |      |       |
| ATOM | 601 | O   | ASP | B | 81 | 73.502 | 61.963 | 60.029 | 1.00 | 43.30 |
| O    |     |     |     |   |    |        |        |        |      |       |
| ATOM | 602 | CB  | ASP | B | 81 | 74.207 | 63.477 | 62.446 | 1.00 | 43.30 |
| C    |     |     |     |   |    |        |        |        |      |       |
| ATOM | 603 | CG  | ASP | B | 81 | 75.117 | 63.256 | 63.632 | 1.00 | 43.30 |
| C    |     |     |     |   |    |        |        |        |      |       |
| ATOM | 604 | OD1 | ASP | B | 81 | 76.274 | 62.837 | 63.422 | 1.00 | 43.30 |
| O    |     |     |     |   |    |        |        |        |      |       |
| ATOM | 605 | OD2 | ASP | B | 81 | 74.676 | 63.499 | 64.773 | 1.00 | 43.30 |
| O    |     |     |     |   |    |        |        |        |      |       |
| ATOM | 606 | N   | ASP | B | 82 | 73.776 | 63.949 | 59.020 | 1.00 | 37.05 |
| N    |     |     |     |   |    |        |        |        |      |       |
| ATOM | 607 | CA  | ASP | B | 82 | 72.786 | 63.688 | 57.986 | 1.00 | 37.05 |
| C    |     |     |     |   |    |        |        |        |      |       |
| ATOM | 608 | C   | ASP | B | 82 | 73.371 | 63.047 | 56.739 | 1.00 | 37.05 |
| C    |     |     |     |   |    |        |        |        |      |       |
| ATOM | 609 | O   | ASP | B | 82 | 72.630 | 62.801 | 55.784 | 1.00 | 37.05 |
| O    |     |     |     |   |    |        |        |        |      |       |
| ATOM | 610 | CB  | ASP | B | 82 | 72.075 | 64.986 | 57.604 | 1.00 | 37.05 |
| C    |     |     |     |   |    |        |        |        |      |       |
| ATOM | 611 | CG  | ASP | B | 82 | 71.368 | 65.622 | 58.770 | 1.00 | 37.05 |
| C    |     |     |     |   |    |        |        |        |      |       |
| ATOM | 612 | OD1 | ASP | B | 82 | 71.267 | 64.974 | 59.826 | 1.00 | 37.05 |
| O    |     |     |     |   |    |        |        |        |      |       |
| ATOM | 613 | OD2 | ASP | B | 82 | 70.912 | 66.772 | 58.632 | 1.00 | 37.05 |
| O    |     |     |     |   |    |        |        |        |      |       |
| ATOM | 614 | N   | PHE | B | 83 | 74.667 | 62.769 | 56.716 | 1.00 | 38.01 |
| N    |     |     |     |   |    |        |        |        |      |       |
| ATOM | 615 | CA  | PHE | B | 83 | 75.288 | 62.151 | 55.553 | 1.00 | 38.01 |
| C    |     |     |     |   |    |        |        |        |      |       |
| ATOM | 616 | C   | PHE | B | 83 | 75.107 | 60.643 | 55.661 | 1.00 | 38.01 |
| C    |     |     |     |   |    |        |        |        |      |       |
| ATOM | 617 | O   | PHE | B | 83 | 75.739 | 59.989 | 56.494 | 1.00 | 38.01 |

|      |     |     |     |   |    |        |        |        |      |       |
|------|-----|-----|-----|---|----|--------|--------|--------|------|-------|
| O    |     |     |     |   |    |        |        |        |      |       |
| ATOM | 618 | CB  | PHE | B | 83 | 76.754 | 62.562 | 55.462 | 1.00 | 38.01 |
| C    |     |     |     |   |    |        |        |        |      |       |
| ATOM | 619 | CG  | PHE | B | 83 | 76.934 | 64.020 | 55.172 | 1.00 | 38.01 |
| C    |     |     |     |   |    |        |        |        |      |       |
| ATOM | 620 | CD1 | PHE | B | 83 | 76.995 | 64.474 | 53.871 | 1.00 | 38.01 |
| C    |     |     |     |   |    |        |        |        |      |       |
| ATOM | 621 | CD2 | PHE | B | 83 | 76.997 | 64.941 | 56.200 | 1.00 | 38.01 |
| C    |     |     |     |   |    |        |        |        |      |       |
| ATOM | 622 | CE1 | PHE | B | 83 | 77.141 | 65.815 | 53.600 | 1.00 | 38.01 |
| C    |     |     |     |   |    |        |        |        |      |       |
| ATOM | 623 | CE2 | PHE | B | 83 | 77.145 | 66.283 | 55.932 | 1.00 | 38.01 |
| C    |     |     |     |   |    |        |        |        |      |       |
| ATOM | 624 | CZ  | PHE | B | 83 | 77.216 | 66.718 | 54.632 | 1.00 | 38.01 |
| C    |     |     |     |   |    |        |        |        |      |       |
| ATOM | 625 | N   | THR | B | 84 | 74.228 | 60.097 | 54.826 | 1.00 | 28.30 |
| N    |     |     |     |   |    |        |        |        |      |       |
| ATOM | 626 | CA  | THR | B | 84 | 73.740 | 58.737 | 54.997 | 1.00 | 28.30 |
| C    |     |     |     |   |    |        |        |        |      |       |
| ATOM | 627 | C   | THR | B | 84 | 73.125 | 58.277 | 53.683 | 1.00 | 28.30 |
| C    |     |     |     |   |    |        |        |        |      |       |
| ATOM | 628 | O   | THR | B | 84 | 73.097 | 59.017 | 52.698 | 1.00 | 28.30 |
| O    |     |     |     |   |    |        |        |        |      |       |
| ATOM | 629 | CB  | THR | B | 84 | 72.728 | 58.666 | 56.140 | 1.00 | 28.30 |
| C    |     |     |     |   |    |        |        |        |      |       |
| ATOM | 630 | N   | THR | B | 85 | 72.631 | 57.042 | 53.673 | 1.00 | 22.95 |
| N    |     |     |     |   |    |        |        |        |      |       |
| ATOM | 631 | CA  | THR | B | 85 | 71.894 | 56.518 | 52.532 | 1.00 | 22.95 |
| C    |     |     |     |   |    |        |        |        |      |       |
| ATOM | 632 | C   | THR | B | 85 | 70.404 | 56.633 | 52.819 | 1.00 | 22.95 |
| C    |     |     |     |   |    |        |        |        |      |       |
| ATOM | 633 | O   | THR | B | 85 | 69.940 | 56.216 | 53.878 | 1.00 | 22.95 |
| O    |     |     |     |   |    |        |        |        |      |       |
| ATOM | 634 | CB  | THR | B | 85 | 72.262 | 55.062 | 52.246 | 1.00 | 22.95 |
| C    |     |     |     |   |    |        |        |        |      |       |
| ATOM | 635 | OG1 | THR | B | 85 | 73.684 | 54.939 | 52.137 | 1.00 | 22.95 |
| O    |     |     |     |   |    |        |        |        |      |       |
| ATOM | 636 | CG2 | THR | B | 85 | 71.631 | 54.608 | 50.950 | 1.00 | 22.95 |
| C    |     |     |     |   |    |        |        |        |      |       |
| ATOM | 637 | N   | TYR | B | 86 | 69.659 | 57.204 | 51.884 | 1.00 | 20.45 |
| N    |     |     |     |   |    |        |        |        |      |       |
| ATOM | 638 | CA  | TYR | B | 86 | 68.228 | 57.406 | 52.056 | 1.00 | 20.45 |
| C    |     |     |     |   |    |        |        |        |      |       |
| ATOM | 639 | C   | TYR | B | 86 | 67.467 | 56.465 | 51.134 | 1.00 | 20.45 |
| C    |     |     |     |   |    |        |        |        |      |       |
| ATOM | 640 | O   | TYR | B | 86 | 67.796 | 56.350 | 49.953 | 1.00 | 20.45 |
| O    |     |     |     |   |    |        |        |        |      |       |
| ATOM | 641 | CB  | TYR | B | 86 | 67.851 | 58.862 | 51.781 | 1.00 | 20.45 |
| C    |     |     |     |   |    |        |        |        |      |       |
| ATOM | 642 | CG  | TYR | B | 86 | 68.410 | 59.799 | 52.822 | 1.00 | 20.45 |

|      |     |     |     |   |    |        |        |        |      |       |
|------|-----|-----|-----|---|----|--------|--------|--------|------|-------|
| C    |     |     |     |   |    |        |        |        |      |       |
| ATOM | 643 | CD1 | TYR | B | 86 | 67.682 | 60.122 | 53.947 | 1.00 | 20.45 |
| C    |     |     |     |   |    |        |        |        |      |       |
| ATOM | 644 | CD2 | TYR | B | 86 | 69.682 | 60.335 | 52.688 | 1.00 | 20.45 |
| C    |     |     |     |   |    |        |        |        |      |       |
| ATOM | 645 | CE1 | TYR | B | 86 | 68.195 | 60.969 | 54.907 | 1.00 | 20.45 |
| C    |     |     |     |   |    |        |        |        |      |       |
| ATOM | 646 | CE2 | TYR | B | 86 | 70.200 | 61.178 | 53.641 | 1.00 | 20.45 |
| C    |     |     |     |   |    |        |        |        |      |       |
| ATOM | 647 | CZ  | TYR | B | 86 | 69.457 | 61.489 | 54.747 | 1.00 | 20.45 |
| C    |     |     |     |   |    |        |        |        |      |       |
| ATOM | 648 | OH  | TYR | B | 86 | 69.976 | 62.332 | 55.698 | 1.00 | 20.45 |
| O    |     |     |     |   |    |        |        |        |      |       |
| ATOM | 649 | N   | PHE | B | 87 | 66.459 | 55.787 | 51.682 | 1.00 | 15.92 |
| N    |     |     |     |   |    |        |        |        |      |       |
| ATOM | 650 | CA  | PHE | B | 87 | 65.644 | 54.827 | 50.949 | 1.00 | 15.92 |
| C    |     |     |     |   |    |        |        |        |      |       |
| ATOM | 651 | C   | PHE | B | 87 | 64.183 | 55.263 | 50.972 | 1.00 | 15.92 |
| C    |     |     |     |   |    |        |        |        |      |       |
| ATOM | 652 | O   | PHE | B | 87 | 63.713 | 55.807 | 51.966 | 1.00 | 15.92 |
| O    |     |     |     |   |    |        |        |        |      |       |
| ATOM | 653 | CB  | PHE | B | 87 | 65.745 | 53.420 | 51.562 | 1.00 | 15.92 |
| C    |     |     |     |   |    |        |        |        |      |       |
| ATOM | 654 | CG  | PHE | B | 87 | 67.107 | 52.806 | 51.476 | 1.00 | 15.92 |
| C    |     |     |     |   |    |        |        |        |      |       |
| ATOM | 655 | CD1 | PHE | B | 87 | 67.543 | 52.230 | 50.305 | 1.00 | 15.92 |
| C    |     |     |     |   |    |        |        |        |      |       |
| ATOM | 656 | CD2 | PHE | B | 87 | 67.938 | 52.779 | 52.579 | 1.00 | 15.92 |
| C    |     |     |     |   |    |        |        |        |      |       |
| ATOM | 657 | CE1 | PHE | B | 87 | 68.794 | 51.660 | 50.226 | 1.00 | 15.92 |
| C    |     |     |     |   |    |        |        |        |      |       |
| ATOM | 658 | CE2 | PHE | B | 87 | 69.187 | 52.198 | 52.500 | 1.00 | 15.92 |
| C    |     |     |     |   |    |        |        |        |      |       |
| ATOM | 659 | CZ  | PHE | B | 87 | 69.609 | 51.648 | 51.323 | 1.00 | 15.92 |
| C    |     |     |     |   |    |        |        |        |      |       |
| ATOM | 660 | N   | CYS | B | 88 | 63.467 | 55.025 | 49.880 | 1.00 | 15.34 |
| N    |     |     |     |   |    |        |        |        |      |       |
| ATOM | 661 | CA  | CYS | B | 88 | 62.012 | 55.128 | 49.866 | 1.00 | 15.34 |
| C    |     |     |     |   |    |        |        |        |      |       |
| ATOM | 662 | C   | CYS | B | 88 | 61.435 | 53.721 | 49.759 | 1.00 | 15.34 |
| C    |     |     |     |   |    |        |        |        |      |       |
| ATOM | 663 | O   | CYS | B | 88 | 62.026 | 52.851 | 49.121 | 1.00 | 15.34 |
| O    |     |     |     |   |    |        |        |        |      |       |
| ATOM | 664 | CB  | CYS | B | 88 | 61.502 | 56.018 | 48.709 | 1.00 | 15.34 |
| C    |     |     |     |   |    |        |        |        |      |       |
| ATOM | 665 | SG  | CYS | B | 88 | 62.031 | 55.521 | 47.042 | 1.00 | 15.34 |
| S    |     |     |     |   |    |        |        |        |      |       |
| ATOM | 666 | N   | GLN | B | 89 | 60.305 | 53.488 | 50.415 | 1.00 | 13.02 |
| N    |     |     |     |   |    |        |        |        |      |       |
| ATOM | 667 | CA  | GLN | B | 89 | 59.610 | 52.211 | 50.335 | 1.00 | 13.02 |

|      |     |     |     |   |    |        |        |        |      |       |
|------|-----|-----|-----|---|----|--------|--------|--------|------|-------|
| C    |     |     |     |   |    |        |        |        |      |       |
| ATOM | 668 | C   | GLN | B | 89 | 58.124 | 52.466 | 50.135 | 1.00 | 13.02 |
| C    |     |     |     |   |    |        |        |        |      |       |
| ATOM | 669 | O   | GLN | B | 89 | 57.548 | 53.320 | 50.803 | 1.00 | 13.02 |
| O    |     |     |     |   |    |        |        |        |      |       |
| ATOM | 670 | CB  | GLN | B | 89 | 59.821 | 51.363 | 51.606 | 1.00 | 13.02 |
| C    |     |     |     |   |    |        |        |        |      |       |
| ATOM | 671 | CG  | GLN | B | 89 | 59.210 | 49.969 | 51.525 | 1.00 | 13.02 |
| C    |     |     |     |   |    |        |        |        |      |       |
| ATOM | 672 | CD  | GLN | B | 89 | 59.282 | 49.191 | 52.828 | 1.00 | 13.02 |
| C    |     |     |     |   |    |        |        |        |      |       |
| ATOM | 673 | OE1 | GLN | B | 89 | 59.306 | 49.761 | 53.908 | 1.00 | 13.02 |
| O    |     |     |     |   |    |        |        |        |      |       |
| ATOM | 674 | NE2 | GLN | B | 89 | 59.319 | 47.872 | 52.719 | 1.00 | 13.02 |
| N    |     |     |     |   |    |        |        |        |      |       |
| ATOM | 675 | N   | GLN | B | 90 | 57.499 | 51.722 | 49.234 | 1.00 | 12.89 |
| N    |     |     |     |   |    |        |        |        |      |       |
| ATOM | 676 | CA  | GLN | B | 90 | 56.051 | 51.788 | 49.090 | 1.00 | 12.89 |
| C    |     |     |     |   |    |        |        |        |      |       |
| ATOM | 677 | C   | GLN | B | 90 | 55.403 | 50.651 | 49.868 | 1.00 | 12.89 |
| C    |     |     |     |   |    |        |        |        |      |       |
| ATOM | 678 | O   | GLN | B | 90 | 55.967 | 49.565 | 50.000 | 1.00 | 12.89 |
| O    |     |     |     |   |    |        |        |        |      |       |
| ATOM | 679 | CB  | GLN | B | 90 | 55.626 | 51.736 | 47.617 | 1.00 | 12.89 |
| C    |     |     |     |   |    |        |        |        |      |       |
| ATOM | 680 | CG  | GLN | B | 90 | 55.934 | 50.437 | 46.882 | 1.00 | 12.89 |
| C    |     |     |     |   |    |        |        |        |      |       |
| ATOM | 681 | CD  | GLN | B | 90 | 54.824 | 49.405 | 46.987 | 1.00 | 12.89 |
| C    |     |     |     |   |    |        |        |        |      |       |
| ATOM | 682 | OE1 | GLN | B | 90 | 53.703 | 49.719 | 47.368 | 1.00 | 12.89 |
| O    |     |     |     |   |    |        |        |        |      |       |
| ATOM | 683 | NE2 | GLN | B | 90 | 55.141 | 48.166 | 46.656 | 1.00 | 12.89 |
| N    |     |     |     |   |    |        |        |        |      |       |
| ATOM | 684 | N   | TYR | B | 91 | 54.214 | 50.916 | 50.404 | 1.00 | 13.84 |
| N    |     |     |     |   |    |        |        |        |      |       |
| ATOM | 685 | CA  | TYR | B | 91 | 53.460 | 49.888 | 51.106 | 1.00 | 13.84 |
| C    |     |     |     |   |    |        |        |        |      |       |
| ATOM | 686 | C   | TYR | B | 91 | 52.007 | 49.865 | 50.646 | 1.00 | 13.84 |
| C    |     |     |     |   |    |        |        |        |      |       |
| ATOM | 687 | O   | TYR | B | 91 | 51.107 | 49.560 | 51.423 | 1.00 | 13.84 |
| O    |     |     |     |   |    |        |        |        |      |       |
| ATOM | 688 | CB  | TYR | B | 91 | 53.559 | 50.060 | 52.622 | 1.00 | 13.84 |
| C    |     |     |     |   |    |        |        |        |      |       |
| ATOM | 689 | CG  | TYR | B | 91 | 53.193 | 51.422 | 53.164 | 1.00 | 13.84 |
| C    |     |     |     |   |    |        |        |        |      |       |
| ATOM | 690 | CD1 | TYR | B | 91 | 51.940 | 51.655 | 53.707 | 1.00 | 13.84 |
| C    |     |     |     |   |    |        |        |        |      |       |
| ATOM | 691 | CD2 | TYR | B | 91 | 54.113 | 52.461 | 53.179 | 1.00 | 13.84 |
| C    |     |     |     |   |    |        |        |        |      |       |
| ATOM | 692 | CE1 | TYR | B | 91 | 51.604 | 52.881 | 54.224 | 1.00 | 13.84 |

|      |     |     |     |   |    |        |        |        |      |       |
|------|-----|-----|-----|---|----|--------|--------|--------|------|-------|
| C    |     |     |     |   |    |        |        |        |      |       |
| ATOM | 693 | CE2 | TYR | B | 91 | 53.784 | 53.695 | 53.695 | 1.00 | 13.84 |
| C    |     |     |     |   |    |        |        |        |      |       |
| ATOM | 694 | CZ  | TYR | B | 91 | 52.525 | 53.898 | 54.216 | 1.00 | 13.84 |
| C    |     |     |     |   |    |        |        |        |      |       |
| ATOM | 695 | OH  | TYR | B | 91 | 52.178 | 55.119 | 54.736 | 1.00 | 13.84 |
| O    |     |     |     |   |    |        |        |        |      |       |
| ATOM | 696 | N   | ASN | B | 92 | 51.783 | 50.181 | 49.372 | 1.00 | 14.17 |
| N    |     |     |     |   |    |        |        |        |      |       |
| ATOM | 697 | CA  | ASN | B | 92 | 50.462 | 50.056 | 48.768 | 1.00 | 14.17 |
| C    |     |     |     |   |    |        |        |        |      |       |
| ATOM | 698 | C   | ASN | B | 92 | 50.034 | 48.594 | 48.672 | 1.00 | 14.17 |
| C    |     |     |     |   |    |        |        |        |      |       |
| ATOM | 699 | O   | ASN | B | 92 | 48.903 | 48.245 | 49.022 | 1.00 | 14.17 |
| O    |     |     |     |   |    |        |        |        |      |       |
| ATOM | 700 | CB  | ASN | B | 92 | 50.487 | 50.723 | 47.391 | 1.00 | 14.17 |
| C    |     |     |     |   |    |        |        |        |      |       |
| ATOM | 701 | CG  | ASN | B | 92 | 49.190 | 50.575 | 46.636 | 1.00 | 14.17 |
| C    |     |     |     |   |    |        |        |        |      |       |
| ATOM | 702 | OD1 | ASN | B | 92 | 48.278 | 51.368 | 46.799 | 1.00 | 14.17 |
| O    |     |     |     |   |    |        |        |        |      |       |
| ATOM | 703 | ND2 | ASN | B | 92 | 49.113 | 49.561 | 45.791 | 1.00 | 14.17 |
| N    |     |     |     |   |    |        |        |        |      |       |
| ATOM | 704 | N   | SER | B | 93 | 50.932 | 47.722 | 48.220 | 1.00 | 14.02 |
| N    |     |     |     |   |    |        |        |        |      |       |
| ATOM | 705 | CA  | SER | B | 93 | 50.613 | 46.311 | 48.036 | 1.00 | 14.02 |
| C    |     |     |     |   |    |        |        |        |      |       |
| ATOM | 706 | C   | SER | B | 93 | 51.900 | 45.498 | 48.032 | 1.00 | 14.02 |
| C    |     |     |     |   |    |        |        |        |      |       |
| ATOM | 707 | O   | SER | B | 93 | 52.987 | 46.029 | 47.807 | 1.00 | 14.02 |
| O    |     |     |     |   |    |        |        |        |      |       |
| ATOM | 708 | CB  | SER | B | 93 | 49.829 | 46.079 | 46.739 | 1.00 | 14.02 |
| C    |     |     |     |   |    |        |        |        |      |       |
| ATOM | 709 | OG  | SER | B | 93 | 50.425 | 46.763 | 45.657 | 1.00 | 14.02 |
| O    |     |     |     |   |    |        |        |        |      |       |
| ATOM | 710 | N   | TYR | B | 94 | 51.754 | 44.196 | 48.275 | 1.00 | 14.41 |
| N    |     |     |     |   |    |        |        |        |      |       |
| ATOM | 711 | CA  | TYR | B | 94 | 52.884 | 43.276 | 48.283 | 1.00 | 14.41 |
| C    |     |     |     |   |    |        |        |        |      |       |
| ATOM | 712 | C   | TYR | B | 94 | 53.453 | 43.090 | 46.877 | 1.00 | 14.41 |
| C    |     |     |     |   |    |        |        |        |      |       |
| ATOM | 713 | O   | TYR | B | 94 | 52.714 | 43.122 | 45.894 | 1.00 | 14.41 |
| O    |     |     |     |   |    |        |        |        |      |       |
| ATOM | 714 | CB  | TYR | B | 94 | 52.463 | 41.908 | 48.807 | 1.00 | 14.41 |
| C    |     |     |     |   |    |        |        |        |      |       |
| ATOM | 715 | CG  | TYR | B | 94 | 51.971 | 41.861 | 50.228 | 1.00 | 14.41 |
| C    |     |     |     |   |    |        |        |        |      |       |
| ATOM | 716 | CD1 | TYR | B | 94 | 52.680 | 42.458 | 51.252 | 1.00 | 14.41 |
| C    |     |     |     |   |    |        |        |        |      |       |
| ATOM | 717 | CD2 | TYR | B | 94 | 50.803 | 41.188 | 50.547 | 1.00 | 14.41 |

|      |     |     |     |   |    |        |        |        |      |       |
|------|-----|-----|-----|---|----|--------|--------|--------|------|-------|
| C    |     |     |     |   |    |        |        |        |      |       |
| ATOM | 718 | CE1 | TYR | B | 94 | 52.236 | 42.398 | 52.548 | 1.00 | 14.41 |
| C    |     |     |     |   |    |        |        |        |      |       |
| ATOM | 719 | CE2 | TYR | B | 94 | 50.355 | 41.125 | 51.837 | 1.00 | 14.41 |
| C    |     |     |     |   |    |        |        |        |      |       |
| ATOM | 720 | CZ  | TYR | B | 94 | 51.074 | 41.726 | 52.834 | 1.00 | 14.41 |
| C    |     |     |     |   |    |        |        |        |      |       |
| ATOM | 721 | OH  | TYR | B | 94 | 50.625 | 41.666 | 54.128 | 1.00 | 14.41 |
| O    |     |     |     |   |    |        |        |        |      |       |
| ATOM | 722 | N   | PRO | B | 95 | 54.772 | 42.886 | 46.750 | 1.00 | 14.04 |
| N    |     |     |     |   |    |        |        |        |      |       |
| ATOM | 723 | CA  | PRO | B | 95 | 55.832 | 43.025 | 47.754 | 1.00 | 14.04 |
| C    |     |     |     |   |    |        |        |        |      |       |
| ATOM | 724 | C   | PRO | B | 95 | 56.087 | 44.492 | 48.077 | 1.00 | 14.04 |
| C    |     |     |     |   |    |        |        |        |      |       |
| ATOM | 725 | O   | PRO | B | 95 | 55.923 | 45.319 | 47.195 | 1.00 | 14.04 |
| O    |     |     |     |   |    |        |        |        |      |       |
| ATOM | 726 | CB  | PRO | B | 95 | 57.053 | 42.399 | 47.071 | 1.00 | 14.04 |
| C    |     |     |     |   |    |        |        |        |      |       |
| ATOM | 727 | CG  | PRO | B | 95 | 56.754 | 42.417 | 45.638 | 1.00 | 14.04 |
| C    |     |     |     |   |    |        |        |        |      |       |
| ATOM | 728 | CD  | PRO | B | 95 | 55.276 | 42.301 | 45.498 | 1.00 | 14.04 |
| C    |     |     |     |   |    |        |        |        |      |       |
| ATOM | 729 | N   | TRP | B | 96 | 56.474 | 44.806 | 49.310 | 1.00 | 13.16 |
| N    |     |     |     |   |    |        |        |        |      |       |
| ATOM | 730 | CA  | TRP | B | 96 | 56.734 | 46.189 | 49.715 | 1.00 | 13.16 |
| C    |     |     |     |   |    |        |        |        |      |       |
| ATOM | 731 | C   | TRP | B | 96 | 58.114 | 46.605 | 49.216 | 1.00 | 13.16 |
| C    |     |     |     |   |    |        |        |        |      |       |
| ATOM | 732 | O   | TRP | B | 96 | 59.109 | 46.491 | 49.929 | 1.00 | 13.16 |
| O    |     |     |     |   |    |        |        |        |      |       |
| ATOM | 733 | CB  | TRP | B | 96 | 56.656 | 46.339 | 51.227 | 1.00 | 13.16 |
| C    |     |     |     |   |    |        |        |        |      |       |
| ATOM | 734 | CG  | TRP | B | 96 | 55.309 | 46.189 | 51.843 | 1.00 | 13.16 |
| C    |     |     |     |   |    |        |        |        |      |       |
| ATOM | 735 | CD1 | TRP | B | 96 | 54.103 | 46.152 | 51.210 | 1.00 | 13.16 |
| C    |     |     |     |   |    |        |        |        |      |       |
| ATOM | 736 | CD2 | TRP | B | 96 | 55.035 | 46.081 | 53.239 | 1.00 | 13.16 |
| C    |     |     |     |   |    |        |        |        |      |       |
| ATOM | 737 | NE1 | TRP | B | 96 | 53.094 | 46.018 | 52.130 | 1.00 | 13.16 |
| N    |     |     |     |   |    |        |        |        |      |       |
| ATOM | 738 | CE2 | TRP | B | 96 | 53.642 | 45.977 | 53.384 | 1.00 | 13.16 |
| C    |     |     |     |   |    |        |        |        |      |       |
| ATOM | 739 | CE3 | TRP | B | 96 | 55.835 | 46.065 | 54.384 | 1.00 | 13.16 |
| C    |     |     |     |   |    |        |        |        |      |       |
| ATOM | 740 | CZ2 | TRP | B | 96 | 53.034 | 45.852 | 54.624 | 1.00 | 13.16 |
| C    |     |     |     |   |    |        |        |        |      |       |
| ATOM | 741 | CZ3 | TRP | B | 96 | 55.230 | 45.946 | 55.611 | 1.00 | 13.16 |
| C    |     |     |     |   |    |        |        |        |      |       |
| ATOM | 742 | CH2 | TRP | B | 96 | 53.844 | 45.839 | 55.725 | 1.00 | 13.16 |



|      |     |     |     |   |     |        |        |        |      |       |
|------|-----|-----|-----|---|-----|--------|--------|--------|------|-------|
| C    |     |     |     |   |     |        |        |        |      |       |
| ATOM | 743 | N   | THR | B | 97  | 58.171 | 47.143 | 48.002 | 1.00 | 13.09 |
| N    |     |     |     |   |     |        |        |        |      |       |
| ATOM | 744 | CA  | THR | B | 97  | 59.442 | 47.365 | 47.325 | 1.00 | 13.09 |
| C    |     |     |     |   |     |        |        |        |      |       |
| ATOM | 745 | C   | THR | B | 97  | 60.155 | 48.623 | 47.807 | 1.00 | 13.09 |
| C    |     |     |     |   |     |        |        |        |      |       |
| ATOM | 746 | O   | THR | B | 97  | 59.536 | 49.659 | 48.047 | 1.00 | 13.09 |
| O    |     |     |     |   |     |        |        |        |      |       |
| ATOM | 747 | CB  | THR | B | 97  | 59.232 | 47.443 | 45.813 | 1.00 | 13.09 |
| C    |     |     |     |   |     |        |        |        |      |       |
| ATOM | 748 | OG1 | THR | B | 97  | 58.003 | 48.118 | 45.523 | 1.00 | 13.09 |
| O    |     |     |     |   |     |        |        |        |      |       |
| ATOM | 749 | CG2 | THR | B | 97  | 59.186 | 46.052 | 45.223 | 1.00 | 13.09 |
| C    |     |     |     |   |     |        |        |        |      |       |
| ATOM | 750 | N   | PHE | B | 98  | 61.474 | 48.512 | 47.941 | 1.00 | 13.15 |
| N    |     |     |     |   |     |        |        |        |      |       |
| ATOM | 751 | CA  | PHE | B | 98  | 62.358 | 49.623 | 48.259 | 1.00 | 13.15 |
| C    |     |     |     |   |     |        |        |        |      |       |
| ATOM | 752 | C   | PHE | B | 98  | 62.931 | 50.228 | 46.983 | 1.00 | 13.15 |
| C    |     |     |     |   |     |        |        |        |      |       |
| ATOM | 753 | O   | PHE | B | 98  | 63.063 | 49.554 | 45.963 | 1.00 | 13.15 |
| O    |     |     |     |   |     |        |        |        |      |       |
| ATOM | 754 | CB  | PHE | B | 98  | 63.533 | 49.162 | 49.126 | 1.00 | 13.15 |
| C    |     |     |     |   |     |        |        |        |      |       |
| ATOM | 755 | CG  | PHE | B | 98  | 63.168 | 48.754 | 50.524 | 1.00 | 13.15 |
| C    |     |     |     |   |     |        |        |        |      |       |
| ATOM | 756 | CD1 | PHE | B | 98  | 63.180 | 49.675 | 51.550 | 1.00 | 13.15 |
| C    |     |     |     |   |     |        |        |        |      |       |
| ATOM | 757 | CD2 | PHE | B | 98  | 62.890 | 47.435 | 50.824 | 1.00 | 13.15 |
| C    |     |     |     |   |     |        |        |        |      |       |
| ATOM | 758 | CE1 | PHE | B | 98  | 62.887 | 49.297 | 52.836 | 1.00 | 13.15 |
| C    |     |     |     |   |     |        |        |        |      |       |
| ATOM | 759 | CE2 | PHE | B | 98  | 62.597 | 47.056 | 52.110 | 1.00 | 13.15 |
| C    |     |     |     |   |     |        |        |        |      |       |
| ATOM | 760 | CZ  | PHE | B | 98  | 62.596 | 47.987 | 53.114 | 1.00 | 13.15 |
| C    |     |     |     |   |     |        |        |        |      |       |
| ATOM | 761 | N   | GLY | B | 99  | 63.307 | 51.498 | 47.061 | 1.00 | 15.83 |
| N    |     |     |     |   |     |        |        |        |      |       |
| ATOM | 762 | CA  | GLY | B | 99  | 64.170 | 52.077 | 46.052 | 1.00 | 15.83 |
| C    |     |     |     |   |     |        |        |        |      |       |
| ATOM | 763 | C   | GLY | B | 99  | 65.599 | 51.581 | 46.204 | 1.00 | 15.83 |
| C    |     |     |     |   |     |        |        |        |      |       |
| ATOM | 764 | O   | GLY | B | 99  | 65.947 | 50.876 | 47.146 | 1.00 | 15.83 |
| O    |     |     |     |   |     |        |        |        |      |       |
| ATOM | 765 | N   | GLN | B | 100 | 66.450 | 51.955 | 45.252 | 1.00 | 19.59 |
| N    |     |     |     |   |     |        |        |        |      |       |
| ATOM | 766 | CA  | GLN | B | 100 | 67.829 | 51.484 | 45.285 | 1.00 | 19.59 |
| C    |     |     |     |   |     |        |        |        |      |       |
| ATOM | 767 | C   | GLN | B | 100 | 68.721 | 52.334 | 46.179 | 1.00 | 19.59 |

|      |     |     |           |        |        |        |      |       |  |
|------|-----|-----|-----------|--------|--------|--------|------|-------|--|
| C    |     |     |           |        |        |        |      |       |  |
| ATOM | 768 | O   | GLN B 100 | 69.891 | 51.991 | 46.361 | 1.00 | 19.59 |  |
| O    |     |     |           |        |        |        |      |       |  |
| ATOM | 769 | CB  | GLN B 100 | 68.398 | 51.408 | 43.862 | 1.00 | 19.59 |  |
| C    |     |     |           |        |        |        |      |       |  |
| ATOM | 770 | CG  | GLN B 100 | 69.067 | 52.671 | 43.358 | 1.00 | 19.59 |  |
| C    |     |     |           |        |        |        |      |       |  |
| ATOM | 771 | CD  | GLN B 100 | 68.083 | 53.768 | 43.014 | 1.00 | 19.59 |  |
| C    |     |     |           |        |        |        |      |       |  |
| ATOM | 772 | OE1 | GLN B 100 | 66.874 | 53.568 | 43.045 | 1.00 | 19.59 |  |
| O    |     |     |           |        |        |        |      |       |  |
| ATOM | 773 | NE2 | GLN B 100 | 68.605 | 54.939 | 42.680 | 1.00 | 19.59 |  |
| N    |     |     |           |        |        |        |      |       |  |
| ATOM | 774 | N   | GLY B 101 | 68.199 | 53.414 | 46.752 | 1.00 | 19.60 |  |
| N    |     |     |           |        |        |        |      |       |  |
| ATOM | 775 | CA  | GLY B 101 | 68.930 | 54.195 | 47.728 | 1.00 | 19.60 |  |
| C    |     |     |           |        |        |        |      |       |  |
| ATOM | 776 | C   | GLY B 101 | 69.662 | 55.391 | 47.154 | 1.00 | 19.60 |  |
| C    |     |     |           |        |        |        |      |       |  |
| ATOM | 777 | O   | GLY B 101 | 70.191 | 55.327 | 46.044 | 1.00 | 19.60 |  |
| O    |     |     |           |        |        |        |      |       |  |
| ATOM | 778 | N   | THR B 102 | 69.690 | 56.487 | 47.904 | 1.00 | 23.07 |  |
| N    |     |     |           |        |        |        |      |       |  |
| ATOM | 779 | CA  | THR B 102 | 70.430 | 57.688 | 47.534 | 1.00 | 23.07 |  |
| C    |     |     |           |        |        |        |      |       |  |
| ATOM | 780 | C   | THR B 102 | 71.477 | 57.946 | 48.603 | 1.00 | 23.07 |  |
| C    |     |     |           |        |        |        |      |       |  |
| ATOM | 781 | O   | THR B 102 | 71.134 | 58.194 | 49.760 | 1.00 | 23.07 |  |
| O    |     |     |           |        |        |        |      |       |  |
| ATOM | 782 | CB  | THR B 102 | 69.506 | 58.900 | 47.398 | 1.00 | 23.07 |  |
| C    |     |     |           |        |        |        |      |       |  |
| ATOM | 783 | OG1 | THR B 102 | 68.733 | 58.779 | 46.202 | 1.00 | 23.07 |  |
| O    |     |     |           |        |        |        |      |       |  |
| ATOM | 784 | CG2 | THR B 102 | 70.322 | 60.197 | 47.345 | 1.00 | 23.07 |  |
| C    |     |     |           |        |        |        |      |       |  |
| ATOM | 785 | N   | LYS B 103 | 72.747 | 57.894 | 48.212 | 1.00 | 31.08 |  |
| N    |     |     |           |        |        |        |      |       |  |
| ATOM | 786 | CA  | LYS B 103 | 73.848 | 58.171 | 49.121 | 1.00 | 31.08 |  |
| C    |     |     |           |        |        |        |      |       |  |
| ATOM | 787 | C   | LYS B 103 | 74.134 | 59.667 | 49.133 | 1.00 | 31.08 |  |
| C    |     |     |           |        |        |        |      |       |  |
| ATOM | 788 | O   | LYS B 103 | 74.293 | 60.279 | 48.075 | 1.00 | 31.08 |  |
| O    |     |     |           |        |        |        |      |       |  |
| ATOM | 789 | CB  | LYS B 103 | 75.103 | 57.408 | 48.699 | 1.00 | 31.08 |  |
| C    |     |     |           |        |        |        |      |       |  |
| ATOM | 790 | CG  | LYS B 103 | 74.894 | 55.924 | 48.457 | 1.00 | 31.08 |  |
| C    |     |     |           |        |        |        |      |       |  |
| ATOM | 791 | CD  | LYS B 103 | 76.137 | 55.210 | 47.901 | 1.00 | 31.08 |  |
| C    |     |     |           |        |        |        |      |       |  |
| ATOM | 792 | CE  | LYS B 103 | 77.483 | 55.683 | 48.464 | 1.00 | 31.08 |  |

|      |     |     |     |   |     |        |        |        |            |
|------|-----|-----|-----|---|-----|--------|--------|--------|------------|
| C    |     |     |     |   |     |        |        |        |            |
| ATOM | 793 | NZ  | LYS | B | 103 | 77.495 | 56.129 | 49.888 | 1.00 31.08 |
| N    |     |     |     |   |     |        |        |        |            |
| ATOM | 794 | N   | VAL | B | 104 | 74.197 | 60.248 | 50.324 | 1.00 33.71 |
| N    |     |     |     |   |     |        |        |        |            |
| ATOM | 795 | CA  | VAL | B | 104 | 74.598 | 61.640 | 50.505 | 1.00 33.71 |
| C    |     |     |     |   |     |        |        |        |            |
| ATOM | 796 | C   | VAL | B | 104 | 75.939 | 61.644 | 51.224 | 1.00 33.71 |
| C    |     |     |     |   |     |        |        |        |            |
| ATOM | 797 | O   | VAL | B | 104 | 76.036 | 61.193 | 52.371 | 1.00 33.71 |
| O    |     |     |     |   |     |        |        |        |            |
| ATOM | 798 | CB  | VAL | B | 104 | 73.550 | 62.441 | 51.287 | 1.00 33.71 |
| C    |     |     |     |   |     |        |        |        |            |
| ATOM | 799 | CG1 | VAL | B | 104 | 74.014 | 63.877 | 51.470 | 1.00 33.71 |
| C    |     |     |     |   |     |        |        |        |            |
| ATOM | 800 | CG2 | VAL | B | 104 | 72.215 | 62.402 | 50.568 | 1.00 33.71 |
| C    |     |     |     |   |     |        |        |        |            |
| ATOM | 801 | N   | GLU | B | 105 | 76.967 | 62.166 | 50.562 | 1.00 39.69 |
| N    |     |     |     |   |     |        |        |        |            |
| ATOM | 802 | CA  | GLU | B | 105 | 78.334 | 62.097 | 51.056 | 1.00 39.69 |
| C    |     |     |     |   |     |        |        |        |            |
| ATOM | 803 | C   | GLU | B | 105 | 78.905 | 63.495 | 51.250 | 1.00 39.69 |
| C    |     |     |     |   |     |        |        |        |            |
| ATOM | 804 | O   | GLU | B | 105 | 78.603 | 64.418 | 50.490 | 1.00 39.69 |
| O    |     |     |     |   |     |        |        |        |            |
| ATOM | 805 | CB  | GLU | B | 105 | 79.222 | 61.311 | 50.098 | 1.00 39.69 |
| C    |     |     |     |   |     |        |        |        |            |
| ATOM | 806 | CG  | GLU | B | 105 | 78.546 | 60.107 | 49.492 | 1.00 39.69 |
| C    |     |     |     |   |     |        |        |        |            |
| ATOM | 807 | CD  | GLU | B | 105 | 79.499 | 58.967 | 49.268 | 1.00 39.69 |
| C    |     |     |     |   |     |        |        |        |            |
| ATOM | 808 | OE1 | GLU | B | 105 | 79.824 | 58.268 | 50.246 | 1.00 39.69 |
| O    |     |     |     |   |     |        |        |        |            |
| ATOM | 809 | OE2 | GLU | B | 105 | 79.926 | 58.771 | 48.114 | 1.00 39.69 |
| O    |     |     |     |   |     |        |        |        |            |
| ATOM | 810 | N   | ILE | B | 106 | 79.741 | 63.633 | 52.274 | 1.00 42.73 |
| N    |     |     |     |   |     |        |        |        |            |
| ATOM | 811 | CA  | ILE | B | 106 | 80.331 | 64.921 | 52.621 | 1.00 42.73 |
| C    |     |     |     |   |     |        |        |        |            |
| ATOM | 812 | C   | ILE | B | 106 | 81.456 | 65.244 | 51.650 | 1.00 42.73 |
| C    |     |     |     |   |     |        |        |        |            |
| ATOM | 813 | O   | ILE | B | 106 | 82.260 | 64.377 | 51.289 | 1.00 42.73 |
| O    |     |     |     |   |     |        |        |        |            |
| ATOM | 814 | CB  | ILE | B | 106 | 80.824 | 64.912 | 54.078 | 1.00 42.73 |
| C    |     |     |     |   |     |        |        |        |            |
| ATOM | 815 | CG1 | ILE | B | 106 | 81.488 | 66.244 | 54.426 | 1.00 42.73 |
| C    |     |     |     |   |     |        |        |        |            |
| ATOM | 816 | CG2 | ILE | B | 106 | 81.779 | 63.756 | 54.320 | 1.00 42.73 |
| C    |     |     |     |   |     |        |        |        |            |
| ATOM | 817 | CD1 | ILE | B | 106 | 81.140 | 66.745 | 55.801 | 1.00 42.73 |



|           |     |     |     |   |     |        |        |        |      |       |
|-----------|-----|-----|-----|---|-----|--------|--------|--------|------|-------|
| ATOM<br>C | 843 | CD2 | LEU | C | 335 | 44.751 | 35.620 | 36.539 | 1.00 | 40.25 |
| ATOM<br>N | 844 | N   | CYS | C | 336 | 43.142 | 40.104 | 35.086 | 1.00 | 34.46 |
| ATOM<br>C | 845 | CA  | CYS | C | 336 | 43.074 | 41.336 | 35.853 | 1.00 | 34.46 |
| ATOM<br>C | 846 | C   | CYS | C | 336 | 43.769 | 41.109 | 37.198 | 1.00 | 34.46 |
| ATOM<br>O | 847 | O   | CYS | C | 336 | 43.595 | 40.054 | 37.810 | 1.00 | 34.46 |
| ATOM<br>C | 848 | CB  | CYS | C | 336 | 41.613 | 41.735 | 36.088 | 1.00 | 34.46 |
| ATOM<br>S | 849 | SG  | CYS | C | 336 | 40.465 | 41.763 | 34.648 | 1.00 | 34.46 |
| ATOM<br>N | 850 | N   | PRO | C | 337 | 44.572 | 42.053 | 37.675 | 1.00 | 27.90 |
| ATOM<br>C | 851 | CA  | PRO | C | 337 | 45.272 | 41.839 | 38.965 | 1.00 | 27.90 |
| ATOM<br>C | 852 | C   | PRO | C | 337 | 44.478 | 42.260 | 40.204 | 1.00 | 27.90 |
| ATOM<br>O | 853 | O   | PRO | C | 337 | 44.733 | 43.277 | 40.842 | 1.00 | 27.90 |
| ATOM<br>C | 854 | CB  | PRO | C | 337 | 46.531 | 42.691 | 38.802 | 1.00 | 27.90 |
| ATOM<br>C | 855 | CG  | PRO | C | 337 | 46.100 | 43.807 | 37.929 | 1.00 | 27.90 |
| ATOM<br>C | 856 | CD  | PRO | C | 337 | 45.005 | 43.297 | 37.020 | 1.00 | 27.90 |
| ATOM<br>N | 857 | N   | PHE | C | 338 | 43.490 | 41.441 | 40.575 | 1.00 | 21.81 |
| ATOM<br>C | 858 | CA  | PHE | C | 338 | 42.622 | 41.782 | 41.698 | 1.00 | 21.81 |
| ATOM<br>C | 859 | C   | PHE | C | 338 | 43.308 | 41.612 | 43.045 | 1.00 | 21.81 |
| ATOM<br>O | 860 | O   | PHE | C | 338 | 42.921 | 42.278 | 44.008 | 1.00 | 21.81 |
| ATOM<br>C | 861 | CB  | PHE | C | 338 | 41.353 | 40.930 | 41.665 | 1.00 | 21.81 |
| ATOM<br>C | 862 | CG  | PHE | C | 338 | 40.351 | 41.374 | 40.643 | 1.00 | 21.81 |
| ATOM<br>C | 863 | CD1 | PHE | C | 338 | 40.505 | 42.564 | 39.969 | 1.00 | 21.81 |
| ATOM<br>C | 864 | CD2 | PHE | C | 338 | 39.246 | 40.596 | 40.362 | 1.00 | 21.81 |
| ATOM<br>C | 865 | CE1 | PHE | C | 338 | 39.584 | 42.969 | 39.034 | 1.00 | 21.81 |
| ATOM<br>C | 866 | CE2 | PHE | C | 338 | 38.321 | 41.002 | 39.429 | 1.00 | 21.81 |
| ATOM<br>C | 867 | CZ  | PHE | C | 338 | 38.494 | 42.185 | 38.762 | 1.00 | 21.81 |

|           |     |     |           |        |        |        |      |       |
|-----------|-----|-----|-----------|--------|--------|--------|------|-------|
| ATOM<br>N | 868 | N   | GLY C 339 | 44.316 | 40.744 | 43.134 | 1.00 | 20.69 |
| ATOM<br>C | 869 | CA  | GLY C 339 | 44.974 | 40.513 | 44.407 | 1.00 | 20.69 |
| ATOM<br>C | 870 | C   | GLY C 339 | 45.614 | 41.755 | 44.983 | 1.00 | 20.69 |
| ATOM<br>O | 871 | O   | GLY C 339 | 45.632 | 41.941 | 46.199 | 1.00 | 20.69 |
| ATOM<br>N | 872 | N   | GLU C 340 | 46.136 | 42.623 | 44.126 | 1.00 | 20.09 |
| ATOM<br>C | 873 | CA  | GLU C 340 | 46.742 | 43.860 | 44.585 | 1.00 | 20.09 |
| ATOM<br>C | 874 | C   | GLU C 340 | 45.715 | 44.949 | 44.866 | 1.00 | 20.09 |
| ATOM<br>O | 875 | O   | GLU C 340 | 46.090 | 46.018 | 45.349 | 1.00 | 20.09 |
| ATOM<br>C | 876 | CB  | GLU C 340 | 47.774 | 44.335 | 43.560 | 1.00 | 20.09 |
| ATOM<br>C | 877 | CG  | GLU C 340 | 48.991 | 43.421 | 43.486 | 1.00 | 20.09 |
| ATOM<br>C | 878 | CD  | GLU C 340 | 49.932 | 43.776 | 42.361 | 1.00 | 20.09 |
| ATOM<br>O | 879 | OE1 | GLU C 340 | 50.605 | 44.818 | 42.451 | 1.00 | 20.09 |
| ATOM<br>O | 880 | OE2 | GLU C 340 | 49.999 | 43.008 | 41.385 | 1.00 | 20.09 |
| ATOM<br>N | 881 | N   | VAL C 341 | 44.441 | 44.708 | 44.583 | 1.00 | 16.71 |
| ATOM<br>C | 882 | CA  | VAL C 341 | 43.366 | 45.603 | 44.995 | 1.00 | 16.71 |
| ATOM<br>C | 883 | C   | VAL C 341 | 42.706 | 45.113 | 46.274 | 1.00 | 16.71 |
| ATOM<br>O | 884 | O   | VAL C 341 | 42.585 | 45.857 | 47.243 | 1.00 | 16.71 |
| ATOM<br>C | 885 | CB  | VAL C 341 | 42.331 | 45.760 | 43.859 | 1.00 | 16.71 |
| ATOM<br>C | 886 | CG1 | VAL C 341 | 41.171 | 46.630 | 44.315 | 1.00 | 16.71 |
| ATOM<br>C | 887 | CG2 | VAL C 341 | 42.983 | 46.344 | 42.623 | 1.00 | 16.71 |
| ATOM<br>N | 888 | N   | PHE C 342 | 42.297 | 43.844 | 46.296 | 1.00 | 15.85 |
| ATOM<br>C | 889 | CA  | PHE C 342 | 41.591 | 43.298 | 47.450 | 1.00 | 15.85 |
| ATOM<br>C | 890 | C   | PHE C 342 | 42.514 | 43.110 | 48.648 | 1.00 | 15.85 |
| ATOM<br>O | 891 | O   | PHE C 342 | 42.107 | 43.354 | 49.787 | 1.00 | 15.85 |
| ATOM<br>C | 892 | CB  | PHE C 342 | 40.926 | 41.977 | 47.074 | 1.00 | 15.85 |



|           |     |     |     |   |     |        |        |        |      |       |
|-----------|-----|-----|-----|---|-----|--------|--------|--------|------|-------|
| ATOM<br>C | 918 | CG2 | THR | C | 345 | 49.738 | 44.851 | 52.641 | 1.00 | 13.82 |
| ATOM<br>N | 919 | N   | ARG | C | 346 | 47.329 | 49.009 | 52.287 | 1.00 | 14.01 |
| ATOM<br>C | 920 | CA  | ARG | C | 346 | 46.786 | 50.269 | 52.783 | 1.00 | 14.01 |
| ATOM<br>C | 921 | C   | ARG | C | 346 | 45.535 | 50.583 | 51.979 | 1.00 | 14.01 |
| ATOM<br>O | 922 | O   | ARG | C | 346 | 45.601 | 50.656 | 50.752 | 1.00 | 14.01 |
| ATOM<br>C | 923 | CB  | ARG | C | 346 | 47.803 | 51.410 | 52.653 | 1.00 | 14.01 |
| ATOM<br>C | 924 | CG  | ARG | C | 346 | 47.887 | 52.352 | 53.848 | 1.00 | 14.01 |
| ATOM<br>C | 925 | CD  | ARG | C | 346 | 46.561 | 52.959 | 54.265 | 1.00 | 14.01 |
| ATOM<br>N | 926 | NE  | ARG | C | 346 | 46.756 | 54.151 | 55.088 | 1.00 | 14.01 |
| ATOM<br>C | 927 | CZ  | ARG | C | 346 | 45.790 | 54.995 | 55.426 | 1.00 | 14.01 |
| ATOM<br>N | 928 | NH1 | ARG | C | 346 | 44.548 | 54.784 | 55.021 | 1.00 | 14.01 |
| ATOM<br>N | 929 | NH2 | ARG | C | 346 | 46.060 | 56.055 | 56.167 | 1.00 | 14.01 |
| ATOM<br>N | 930 | N   | PHE | C | 347 | 44.409 | 50.772 | 52.660 | 1.00 | 12.63 |
| ATOM<br>C | 931 | CA  | PHE | C | 347 | 43.157 | 51.172 | 52.029 | 1.00 | 12.63 |
| ATOM<br>C | 932 | C   | PHE | C | 347 | 42.904 | 52.658 | 52.260 | 1.00 | 12.63 |
| ATOM<br>O | 933 | O   | PHE | C | 347 | 43.407 | 53.254 | 53.210 | 1.00 | 12.63 |
| ATOM<br>C | 934 | CB  | PHE | C | 347 | 41.984 | 50.348 | 52.571 | 1.00 | 12.63 |
| ATOM<br>C | 935 | CG  | PHE | C | 347 | 41.639 | 49.153 | 51.727 | 1.00 | 12.63 |
| ATOM<br>C | 936 | CD1 | PHE | C | 347 | 42.543 | 48.122 | 51.562 | 1.00 | 12.63 |
| ATOM<br>C | 937 | CD2 | PHE | C | 347 | 40.407 | 49.060 | 51.100 | 1.00 | 12.63 |
| ATOM<br>C | 938 | CE1 | PHE | C | 347 | 42.230 | 47.027 | 50.791 | 1.00 | 12.63 |
| ATOM<br>C | 939 | CE2 | PHE | C | 347 | 40.093 | 47.964 | 50.328 | 1.00 | 12.63 |
| ATOM<br>C | 940 | CZ  | PHE | C | 347 | 41.006 | 46.947 | 50.172 | 1.00 | 12.63 |
| ATOM<br>N | 941 | N   | ALA | C | 348 | 42.105 | 53.251 | 51.378 | 1.00 | 12.03 |
| ATOM<br>C | 942 | CA  | ALA | C | 348 | 41.851 | 54.685 | 51.390 | 1.00 | 12.03 |



|           |     |     |           |        |        |        |      |       |
|-----------|-----|-----|-----------|--------|--------|--------|------|-------|
| ATOM<br>C | 943 | C   | ALA C 348 | 40.618 | 55.047 | 52.218 | 1.00 | 12.03 |
| ATOM<br>O | 944 | O   | ALA C 348 | 39.741 | 54.222 | 52.466 | 1.00 | 12.03 |
| ATOM<br>C | 945 | CB  | ALA C 348 | 41.670 | 55.202 | 49.964 | 1.00 | 12.03 |
| ATOM<br>N | 946 | N   | SER C 349 | 40.570 | 56.310 | 52.643 | 1.00 | 13.70 |
| ATOM<br>C | 947 | CA  | SER C 349 | 39.367 | 56.884 | 53.235 | 1.00 | 13.70 |
| ATOM<br>C | 948 | C   | SER C 349 | 38.301 | 57.094 | 52.165 | 1.00 | 13.70 |
| ATOM<br>O | 949 | O   | SER C 349 | 38.605 | 57.281 | 50.989 | 1.00 | 13.70 |
| ATOM<br>C | 950 | CB  | SER C 349 | 39.679 | 58.222 | 53.909 | 1.00 | 13.70 |
| ATOM<br>O | 951 | OG  | SER C 349 | 40.486 | 58.052 | 55.056 | 1.00 | 13.70 |
| ATOM<br>N | 952 | N   | VAL C 350 | 37.035 | 57.089 | 52.589 | 1.00 | 12.50 |
| ATOM<br>C | 953 | CA  | VAL C 350 | 35.945 | 57.150 | 51.617 | 1.00 | 12.50 |
| ATOM<br>C | 954 | C   | VAL C 350 | 35.905 | 58.496 | 50.889 | 1.00 | 12.50 |
| ATOM<br>O | 955 | O   | VAL C 350 | 35.525 | 58.553 | 49.717 | 1.00 | 12.50 |
| ATOM<br>C | 956 | CB  | VAL C 350 | 34.601 | 56.811 | 52.292 | 1.00 | 12.50 |
| ATOM<br>C | 957 | CG1 | VAL C 350 | 34.210 | 57.867 | 53.319 | 1.00 | 12.50 |
| ATOM<br>C | 958 | CG2 | VAL C 350 | 33.499 | 56.619 | 51.246 | 1.00 | 12.50 |
| ATOM<br>N | 959 | N   | TYR C 351 | 36.290 | 59.596 | 51.546 | 1.00 | 15.24 |
| ATOM<br>C | 960 | CA  | TYR C 351 | 36.325 | 60.874 | 50.837 | 1.00 | 15.24 |
| ATOM<br>C | 961 | C   | TYR C 351 | 37.436 | 60.903 | 49.792 | 1.00 | 15.24 |
| ATOM<br>O | 962 | O   | TYR C 351 | 37.281 | 61.540 | 48.748 | 1.00 | 15.24 |
| ATOM<br>C | 963 | CB  | TYR C 351 | 36.462 | 62.040 | 51.826 | 1.00 | 15.24 |
| ATOM<br>C | 964 | CG  | TYR C 351 | 37.873 | 62.387 | 52.251 | 1.00 | 15.24 |
| ATOM<br>C | 965 | CD1 | TYR C 351 | 38.574 | 63.416 | 51.636 | 1.00 | 15.24 |
| ATOM<br>C | 966 | CD2 | TYR C 351 | 38.492 | 61.708 | 53.285 | 1.00 | 15.24 |
| ATOM<br>C | 967 | CE1 | TYR C 351 | 39.855 | 63.738 | 52.027 | 1.00 | 15.24 |



|           |      |     |     |   |     |        |        |        |      |       |
|-----------|------|-----|-----|---|-----|--------|--------|--------|------|-------|
| ATOM<br>O | 993  | O   | ASN | C | 354 | 39.927 | 53.396 | 44.349 | 1.00 | 16.15 |
| ATOM<br>C | 994  | CB  | ASN | C | 354 | 42.325 | 54.237 | 46.136 | 1.00 | 16.15 |
| ATOM<br>C | 995  | CG  | ASN | C | 354 | 43.643 | 54.150 | 45.388 | 1.00 | 16.15 |
| ATOM<br>O | 996  | OD1 | ASN | C | 354 | 43.830 | 54.771 | 44.349 | 1.00 | 16.15 |
| ATOM<br>N | 997  | ND2 | ASN | C | 354 | 44.571 | 53.380 | 45.934 | 1.00 | 16.15 |
| ATOM<br>N | 998  | N   | ARG | C | 355 | 41.177 | 54.687 | 42.995 | 1.00 | 17.19 |
| ATOM<br>C | 999  | CA  | ARG | C | 355 | 40.704 | 54.062 | 41.763 | 1.00 | 17.19 |
| ATOM<br>C | 1000 | C   | ARG | C | 355 | 41.864 | 53.434 | 40.999 | 1.00 | 17.19 |
| ATOM<br>O | 1001 | O   | ARG | C | 355 | 42.914 | 54.058 | 40.833 | 1.00 | 17.19 |
| ATOM<br>C | 1002 | CB  | ARG | C | 355 | 39.976 | 55.069 | 40.866 | 1.00 | 17.19 |
| ATOM<br>C | 1003 | CG  | ARG | C | 355 | 39.820 | 54.613 | 39.418 | 1.00 | 17.19 |
| ATOM<br>C | 1004 | CD  | ARG | C | 355 | 38.746 | 55.391 | 38.678 | 1.00 | 17.19 |
| ATOM<br>N | 1005 | NE  | ARG | C | 355 | 37.409 | 54.966 | 39.074 | 1.00 | 17.19 |
| ATOM<br>C | 1006 | CZ  | ARG | C | 355 | 36.299 | 55.256 | 38.411 | 1.00 | 17.19 |
| ATOM<br>N | 1007 | NH1 | ARG | C | 355 | 36.352 | 55.978 | 37.301 | 1.00 | 17.19 |
| ATOM<br>N | 1008 | NH2 | ARG | C | 355 | 35.132 | 54.819 | 38.850 | 1.00 | 17.19 |
| ATOM<br>N | 1009 | N   | LYS | C | 356 | 41.666 | 52.201 | 40.544 | 1.00 | 23.19 |
| ATOM<br>C | 1010 | CA  | LYS | C | 356 | 42.578 | 51.517 | 39.639 | 1.00 | 23.19 |
| ATOM<br>C | 1011 | C   | LYS | C | 356 | 41.839 | 51.199 | 38.349 | 1.00 | 23.19 |
| ATOM<br>O | 1012 | O   | LYS | C | 356 | 40.653 | 50.876 | 38.370 | 1.00 | 23.19 |
| ATOM<br>C | 1013 | CB  | LYS | C | 356 | 43.121 | 50.232 | 40.258 | 1.00 | 23.19 |
| ATOM<br>C | 1014 | CG  | LYS | C | 356 | 43.866 | 50.444 | 41.558 | 1.00 | 23.19 |
| ATOM<br>C | 1015 | CD  | LYS | C | 356 | 45.315 | 50.888 | 41.342 | 1.00 | 23.19 |
| ATOM<br>C | 1016 | CE  | LYS | C | 356 | 46.109 | 50.000 | 40.384 | 1.00 | 23.19 |
| ATOM<br>N | 1017 | NZ  | LYS | C | 356 | 45.660 | 48.582 | 40.316 | 1.00 | 23.19 |

|           |      |     |           |        |        |        |      |       |
|-----------|------|-----|-----------|--------|--------|--------|------|-------|
| ATOM<br>N | 1018 | N   | ARG C 357 | 42.530 | 51.300 | 37.222 | 1.00 | 33.55 |
| ATOM<br>C | 1019 | CA  | ARG C 357 | 41.930 | 51.006 | 35.929 | 1.00 | 33.55 |
| ATOM<br>C | 1020 | C   | ARG C 357 | 42.712 | 49.886 | 35.261 | 1.00 | 33.55 |
| ATOM<br>O | 1021 | O   | ARG C 357 | 43.944 | 49.882 | 35.297 | 1.00 | 33.55 |
| ATOM<br>C | 1022 | CB  | ARG C 357 | 41.906 | 52.245 | 35.036 | 1.00 | 33.55 |
| ATOM<br>C | 1023 | CG  | ARG C 357 | 41.234 | 52.015 | 33.700 | 1.00 | 33.55 |
| ATOM<br>C | 1024 | CD  | ARG C 357 | 41.345 | 53.233 | 32.810 | 1.00 | 33.55 |
| ATOM<br>N | 1025 | NE  | ARG C 357 | 42.734 | 53.519 | 32.474 | 1.00 | 33.55 |
| ATOM<br>C | 1026 | CZ  | ARG C 357 | 43.211 | 53.544 | 31.235 | 1.00 | 33.55 |
| ATOM<br>N | 1027 | NH1 | ARG C 357 | 42.408 | 53.301 | 30.209 | 1.00 | 33.55 |
| ATOM<br>N | 1028 | NH2 | ARG C 357 | 44.491 | 53.814 | 31.022 | 1.00 | 33.55 |
| ATOM<br>N | 1029 | N   | ILE C 358 | 41.998 | 48.929 | 34.673 | 1.00 | 34.13 |
| ATOM<br>C | 1030 | CA  | ILE C 358 | 42.604 | 47.834 | 33.925 | 1.00 | 34.13 |
| ATOM<br>C | 1031 | C   | ILE C 358 | 41.889 | 47.736 | 32.588 | 1.00 | 34.13 |
| ATOM<br>O | 1032 | O   | ILE C 358 | 40.664 | 47.856 | 32.529 | 1.00 | 34.13 |
| ATOM<br>C | 1033 | CB  | ILE C 358 | 42.523 | 46.497 | 34.684 | 1.00 | 34.13 |
| ATOM<br>C | 1034 | CG1 | ILE C 358 | 42.962 | 46.674 | 36.134 | 1.00 | 34.13 |
| ATOM<br>C | 1035 | CG2 | ILE C 358 | 43.412 | 45.470 | 34.019 | 1.00 | 34.13 |
| ATOM<br>C | 1036 | CD1 | ILE C 358 | 41.965 | 46.170 | 37.134 | 1.00 | 34.13 |
| ATOM<br>N | 1037 | N   | SER C 359 | 42.642 | 47.540 | 31.514 | 1.00 | 39.74 |
| ATOM<br>C | 1038 | CA  | SER C 359 | 42.071 | 47.506 | 30.176 | 1.00 | 39.74 |
| ATOM<br>C | 1039 | C   | SER C 359 | 42.231 | 46.126 | 29.561 | 1.00 | 39.74 |
| ATOM<br>O | 1040 | O   | SER C 359 | 43.252 | 45.464 | 29.765 | 1.00 | 39.74 |
| ATOM<br>C | 1041 | CB  | SER C 359 | 42.725 | 48.548 | 29.271 | 1.00 | 39.74 |
| ATOM<br>O | 1042 | OG  | SER C 359 | 42.279 | 49.849 | 29.594 | 1.00 | 39.74 |



|           |      |     |     |   |     |        |        |        |      |       |
|-----------|------|-----|-----|---|-----|--------|--------|--------|------|-------|
| ATOM<br>C | 1068 | CB  | ALA | C | 363 | 38.433 | 39.305 | 36.398 | 1.00 | 36.27 |
| ATOM<br>N | 1069 | N   | GLU | C | 364 | 38.928 | 36.464 | 37.457 | 1.00 | 37.01 |
| ATOM<br>C | 1070 | CA  | GLU | C | 364 | 38.460 | 35.290 | 38.174 | 1.00 | 37.01 |
| ATOM<br>C | 1071 | C   | GLU | C | 364 | 37.641 | 35.741 | 39.377 | 1.00 | 37.01 |
| ATOM<br>O | 1072 | O   | GLU | C | 364 | 38.159 | 36.435 | 40.256 | 1.00 | 37.01 |
| ATOM<br>C | 1073 | CB  | GLU | C | 364 | 39.643 | 34.431 | 38.610 | 1.00 | 37.01 |
| ATOM<br>C | 1074 | CG  | GLU | C | 364 | 39.376 | 32.970 | 38.500 | 1.00 | 37.01 |
| ATOM<br>C | 1075 | CD  | GLU | C | 364 | 38.321 | 32.531 | 39.467 | 1.00 | 37.01 |
| ATOM<br>O | 1076 | OE1 | GLU | C | 364 | 38.635 | 32.428 | 40.667 | 1.00 | 37.01 |
| ATOM<br>O | 1077 | OE2 | GLU | C | 364 | 37.174 | 32.308 | 39.036 | 1.00 | 37.01 |
| ATOM<br>N | 1078 | N   | TYR | C | 365 | 36.374 | 35.333 | 39.422 | 1.00 | 34.19 |
| ATOM<br>C | 1079 | CA  | TYR | C | 365 | 35.457 | 35.750 | 40.475 | 1.00 | 34.19 |
| ATOM<br>C | 1080 | C   | TYR | C | 365 | 35.094 | 34.625 | 41.433 | 1.00 | 34.19 |
| ATOM<br>O | 1081 | O   | TYR | C | 365 | 34.235 | 34.821 | 42.296 | 1.00 | 34.19 |
| ATOM<br>C | 1082 | CB  | TYR | C | 365 | 34.180 | 36.330 | 39.867 | 1.00 | 34.19 |
| ATOM<br>C | 1083 | CG  | TYR | C | 365 | 34.394 | 37.595 | 39.077 | 1.00 | 34.19 |
| ATOM<br>C | 1084 | CD1 | TYR | C | 365 | 34.830 | 37.547 | 37.766 | 1.00 | 34.19 |
| ATOM<br>C | 1085 | CD2 | TYR | C | 365 | 34.163 | 38.838 | 39.645 | 1.00 | 34.19 |
| ATOM<br>C | 1086 | CE1 | TYR | C | 365 | 35.028 | 38.692 | 37.041 | 1.00 | 34.19 |
| ATOM<br>C | 1087 | CE2 | TYR | C | 365 | 34.358 | 39.992 | 38.925 | 1.00 | 34.19 |
| ATOM<br>C | 1088 | CZ  | TYR | C | 365 | 34.794 | 39.914 | 37.625 | 1.00 | 34.19 |
| ATOM<br>O | 1089 | OH  | TYR | C | 365 | 34.992 | 41.061 | 36.898 | 1.00 | 34.19 |
| ATOM<br>N | 1090 | N   | SER | C | 366 | 35.722 | 33.455 | 41.307 | 1.00 | 34.39 |
| ATOM<br>C | 1091 | CA  | SER | C | 366 | 35.290 | 32.305 | 42.094 | 1.00 | 34.39 |
| ATOM<br>C | 1092 | C   | SER | C | 366 | 35.504 | 32.533 | 43.584 | 1.00 | 34.39 |

|           |      |         |            |        |        |        |      |       |
|-----------|------|---------|------------|--------|--------|--------|------|-------|
| ATOM<br>O | 1093 | O       | SER C 366  | 34.664 | 32.145 | 44.402 | 1.00 | 34.39 |
| ATOM<br>C | 1094 | CB      | SER C 366  | 36.015 | 31.042 | 41.635 | 1.00 | 34.39 |
| ATOM<br>O | 1095 | OG      | SER C 366  | 37.404 | 31.137 | 41.881 | 1.00 | 34.39 |
| ATOM<br>N | 1096 | N       | AVAL C 367 | 36.623 | 33.152 | 43.962 | 0.50 | 31.52 |
| ATOM<br>C | 1097 | CA      | AVAL C 367 | 36.836 | 33.437 | 45.375 | 0.50 | 31.52 |
| ATOM<br>C | 1098 | C       | AVAL C 367 | 35.881 | 34.524 | 45.855 | 0.50 | 31.52 |
| ATOM<br>O | 1099 | O       | AVAL C 367 | 35.526 | 34.569 | 47.037 | 0.50 | 31.52 |
| ATOM<br>C | 1100 | CB      | AVAL C 367 | 38.307 | 33.806 | 45.637 | 0.50 | 31.52 |
| ATOM<br>C | 1101 | CG1AVAL | C 367      | 38.638 | 35.156 | 45.038 | 0.50 | 31.52 |
| ATOM<br>C | 1102 | CG2AVAL | C 367      | 38.596 | 33.797 | 47.124 | 0.50 | 31.52 |
| ATOM<br>N | 1103 | N       | BVAL C 367 | 36.723 | 33.152 | 43.962 | 0.50 | 31.52 |
| ATOM<br>C | 1104 | CA      | BVAL C 367 | 36.936 | 33.437 | 45.375 | 0.50 | 31.52 |
| ATOM<br>C | 1105 | C       | BVAL C 367 | 35.981 | 34.524 | 45.855 | 0.50 | 31.52 |
| ATOM<br>O | 1106 | O       | BVAL C 367 | 35.626 | 34.569 | 47.037 | 0.50 | 31.52 |
| ATOM<br>C | 1107 | CB      | BVAL C 367 | 38.407 | 33.806 | 45.637 | 0.50 | 31.52 |
| ATOM<br>C | 1108 | CG1BVAL | C 367      | 38.609 | 34.221 | 47.078 | 0.50 | 31.52 |
| ATOM<br>C | 1109 | CG2BVAL | C 367      | 39.313 | 32.644 | 45.285 | 0.50 | 31.52 |
| ATOM<br>N | 1110 | N       | LEU C 368  | 35.442 | 35.405 | 44.956 | 1.00 | 29.13 |
| ATOM<br>C | 1111 | CA      | LEU C 368  | 34.520 | 36.466 | 45.342 | 1.00 | 29.13 |
| ATOM<br>C | 1112 | C       | LEU C 368  | 33.095 | 35.954 | 45.521 | 1.00 | 29.13 |
| ATOM<br>O | 1113 | O       | LEU C 368  | 32.327 | 36.541 | 46.287 | 1.00 | 29.13 |
| ATOM<br>C | 1114 | CB      | LEU C 368  | 34.559 | 37.596 | 44.311 | 1.00 | 29.13 |
| ATOM<br>C | 1115 | CG      | LEU C 368  | 35.940 | 38.158 | 43.960 | 1.00 | 29.13 |
| ATOM<br>C | 1116 | CD1     | LEU C 368  | 35.818 | 39.305 | 42.981 | 1.00 | 29.13 |
| ATOM<br>C | 1117 | CD2     | LEU C 368  | 36.697 | 38.595 | 45.197 | 1.00 | 29.13 |

|           |      |     |           |        |        |        |      |       |
|-----------|------|-----|-----------|--------|--------|--------|------|-------|
| ATOM<br>N | 1118 | N   | TYR C 369 | 32.724 | 34.869 | 44.833 | 1.00 | 33.58 |
| ATOM<br>C | 1119 | CA  | TYR C 369 | 31.417 | 34.253 | 45.048 | 1.00 | 33.58 |
| ATOM<br>C | 1120 | C   | TYR C 369 | 31.272 | 33.693 | 46.451 | 1.00 | 33.58 |
| ATOM<br>O | 1121 | O   | TYR C 369 | 30.148 | 33.524 | 46.930 | 1.00 | 33.58 |
| ATOM<br>C | 1122 | CB  | TYR C 369 | 31.181 | 33.113 | 44.057 | 1.00 | 33.58 |
| ATOM<br>C | 1123 | CG  | TYR C 369 | 31.058 | 33.527 | 42.616 | 1.00 | 33.58 |
| ATOM<br>C | 1124 | CD1 | TYR C 369 | 30.249 | 34.585 | 42.244 | 1.00 | 33.58 |
| ATOM<br>C | 1125 | CD2 | TYR C 369 | 31.741 | 32.846 | 41.623 | 1.00 | 33.58 |
| ATOM<br>C | 1126 | CE1 | TYR C 369 | 30.137 | 34.963 | 40.930 | 1.00 | 33.58 |
| ATOM<br>C | 1127 | CE2 | TYR C 369 | 31.631 | 33.215 | 40.304 | 1.00 | 33.58 |
| ATOM<br>C | 1128 | CZ  | TYR C 369 | 30.826 | 34.273 | 39.963 | 1.00 | 33.58 |
| ATOM<br>O | 1129 | OH  | TYR C 369 | 30.712 | 34.648 | 38.647 | 1.00 | 33.58 |
| ATOM<br>N | 1130 | N   | ASN C 370 | 32.381 | 33.400 | 47.114 | 1.00 | 33.49 |
| ATOM<br>C | 1131 | CA  | ASN C 370 | 32.365 | 32.622 | 48.341 | 1.00 | 33.49 |
| ATOM<br>C | 1132 | C   | ASN C 370 | 31.946 | 33.483 | 49.523 | 1.00 | 33.49 |
| ATOM<br>O | 1133 | O   | ASN C 370 | 32.630 | 34.452 | 49.867 | 1.00 | 33.49 |
| ATOM<br>C | 1134 | CB  | ASN C 370 | 33.745 | 32.018 | 48.580 | 1.00 | 33.49 |
| ATOM<br>C | 1135 | CG  | ASN C 370 | 33.817 | 31.234 | 49.859 | 1.00 | 33.49 |
| ATOM<br>O | 1136 | OD1 | ASN C 370 | 32.985 | 30.369 | 50.115 | 1.00 | 33.49 |
| ATOM<br>N | 1137 | ND2 | ASN C 370 | 34.808 | 31.537 | 50.681 | 1.00 | 33.49 |
| ATOM<br>N | 1138 | N   | SER C 371 | 30.830 | 33.130 | 50.149 | 1.00 | 34.71 |
| ATOM<br>C | 1139 | CA  | SER C 371 | 30.528 | 33.682 | 51.456 | 1.00 | 34.71 |
| ATOM<br>C | 1140 | C   | SER C 371 | 31.497 | 33.110 | 52.486 | 1.00 | 34.71 |
| ATOM<br>O | 1141 | O   | SER C 371 | 32.321 | 32.244 | 52.188 | 1.00 | 34.71 |
| ATOM<br>C | 1142 | CB  | SER C 371 | 29.085 | 33.386 | 51.849 | 1.00 | 34.71 |



|           |      |     |           |        |        |        |      |       |
|-----------|------|-----|-----------|--------|--------|--------|------|-------|
| ATOM<br>O | 1143 | OG  | SER C 371 | 28.241 | 33.388 | 50.714 | 1.00 | 34.71 |
| ATOM<br>N | 1144 | N   | ALA C 372 | 31.421 | 33.647 | 53.701 | 1.00 | 37.16 |
| ATOM<br>C | 1145 | CA  | ALA C 372 | 32.310 | 33.289 | 54.804 | 1.00 | 37.16 |
| ATOM<br>C | 1146 | C   | ALA C 372 | 33.713 | 33.831 | 54.562 | 1.00 | 37.16 |
| ATOM<br>O | 1147 | O   | ALA C 372 | 34.574 | 33.759 | 55.443 | 1.00 | 37.16 |
| ATOM<br>C | 1148 | CB  | ALA C 372 | 32.350 | 31.773 | 55.034 | 1.00 | 37.16 |
| ATOM<br>N | 1149 | N   | SER C 373 | 33.952 | 34.380 | 53.380 | 1.00 | 32.75 |
| ATOM<br>C | 1150 | CA  | SER C 373 | 35.115 | 35.214 | 53.134 | 1.00 | 32.75 |
| ATOM<br>C | 1151 | C   | SER C 373 | 34.744 | 36.639 | 52.778 | 1.00 | 32.75 |
| ATOM<br>O | 1152 | O   | SER C 373 | 35.509 | 37.552 | 53.083 | 1.00 | 32.75 |
| ATOM<br>C | 1153 | CB  | SER C 373 | 35.983 | 34.633 | 52.010 | 1.00 | 32.75 |
| ATOM<br>O | 1154 | OG  | SER C 373 | 35.270 | 34.579 | 50.790 | 1.00 | 32.75 |
| ATOM<br>N | 1155 | N   | PHE C 374 | 33.585 | 36.850 | 52.161 | 1.00 | 25.92 |
| ATOM<br>C | 1156 | CA  | PHE C 374 | 33.109 | 38.178 | 51.802 | 1.00 | 25.92 |
| ATOM<br>C | 1157 | C   | PHE C 374 | 31.707 | 38.361 | 52.345 | 1.00 | 25.92 |
| ATOM<br>O | 1158 | O   | PHE C 374 | 30.807 | 37.578 | 52.027 | 1.00 | 25.92 |
| ATOM<br>C | 1159 | CB  | PHE C 374 | 33.148 | 38.379 | 50.290 | 1.00 | 25.92 |
| ATOM<br>C | 1160 | CG  | PHE C 374 | 34.530 | 38.398 | 49.748 | 1.00 | 25.92 |
| ATOM<br>C | 1161 | CD1 | PHE C 374 | 35.358 | 39.473 | 49.991 | 1.00 | 25.92 |
| ATOM<br>C | 1162 | CD2 | PHE C 374 | 35.025 | 37.326 | 49.037 | 1.00 | 25.92 |
| ATOM<br>C | 1163 | CE1 | PHE C 374 | 36.638 | 39.492 | 49.518 | 1.00 | 25.92 |
| ATOM<br>C | 1164 | CE2 | PHE C 374 | 36.308 | 37.342 | 48.559 | 1.00 | 25.92 |
| ATOM<br>C | 1165 | CZ  | PHE C 374 | 37.117 | 38.424 | 48.798 | 1.00 | 25.92 |
| ATOM<br>N | 1166 | N   | SER C 375 | 31.528 | 39.398 | 53.162 | 1.00 | 24.99 |
| ATOM<br>C | 1167 | CA  | SER C 375 | 30.260 | 39.595 | 53.848 | 1.00 | 24.99 |



|           |      |     |           |        |        |        |      |       |
|-----------|------|-----|-----------|--------|--------|--------|------|-------|
| ATOM<br>O | 1193 | O   | LYS C 378 | 27.464 | 43.312 | 43.271 | 1.00 | 24.02 |
| ATOM<br>C | 1194 | CB  | LYS C 378 | 25.111 | 43.411 | 45.432 | 1.00 | 24.02 |
| ATOM<br>C | 1195 | CG  | LYS C 378 | 24.907 | 43.256 | 46.916 | 1.00 | 24.02 |
| ATOM<br>C | 1196 | CD  | LYS C 378 | 23.758 | 44.114 | 47.392 | 1.00 | 24.02 |
| ATOM<br>C | 1197 | CE  | LYS C 378 | 22.431 | 43.425 | 47.148 | 1.00 | 24.02 |
| ATOM<br>N | 1198 | NZ  | LYS C 378 | 22.328 | 42.161 | 47.923 | 1.00 | 24.02 |
| ATOM<br>N | 1199 | N   | CYS C 379 | 25.569 | 42.510 | 42.388 | 1.00 | 24.87 |
| ATOM<br>C | 1200 | CA  | CYS C 379 | 25.879 | 42.999 | 41.056 | 1.00 | 24.87 |
| ATOM<br>C | 1201 | C   | CYS C 379 | 24.669 | 43.719 | 40.486 | 1.00 | 24.87 |
| ATOM<br>O | 1202 | O   | CYS C 379 | 23.523 | 43.368 | 40.768 | 1.00 | 24.87 |
| ATOM<br>C | 1203 | CB  | CYS C 379 | 26.336 | 41.866 | 40.116 | 1.00 | 24.87 |
| ATOM<br>S | 1204 | SG  | CYS C 379 | 27.926 | 41.106 | 40.582 | 1.00 | 24.87 |
| ATOM<br>N | 1205 | N   | TYR C 380 | 24.945 | 44.743 | 39.690 | 1.00 | 24.50 |
| ATOM<br>C | 1206 | CA  | TYR C 380 | 23.951 | 45.614 | 39.087 | 1.00 | 24.50 |
| ATOM<br>C | 1207 | C   | TYR C 380 | 24.205 | 45.654 | 37.589 | 1.00 | 24.50 |
| ATOM<br>O | 1208 | O   | TYR C 380 | 25.342 | 45.866 | 37.156 | 1.00 | 24.50 |
| ATOM<br>C | 1209 | CB  | TYR C 380 | 24.030 | 47.030 | 39.668 | 1.00 | 24.50 |
| ATOM<br>C | 1210 | CG  | TYR C 380 | 23.783 | 47.106 | 41.154 | 1.00 | 24.50 |
| ATOM<br>C | 1211 | CD1 | TYR C 380 | 22.507 | 47.301 | 41.654 | 1.00 | 24.50 |
| ATOM<br>C | 1212 | CD2 | TYR C 380 | 24.828 | 46.986 | 42.058 | 1.00 | 24.50 |
| ATOM<br>C | 1213 | CE1 | TYR C 380 | 22.277 | 47.367 | 43.004 | 1.00 | 24.50 |
| ATOM<br>C | 1214 | CE2 | TYR C 380 | 24.604 | 47.050 | 43.412 | 1.00 | 24.50 |
| ATOM<br>C | 1215 | CZ  | TYR C 380 | 23.326 | 47.242 | 43.880 | 1.00 | 24.50 |
| ATOM<br>O | 1216 | OH  | TYR C 380 | 23.097 | 47.307 | 45.230 | 1.00 | 24.50 |
| ATOM<br>N | 1217 | N   | GLY C 381 | 23.153 | 45.441 | 36.802 | 1.00 | 29.88 |

|           |      |     |           |        |        |        |      |       |
|-----------|------|-----|-----------|--------|--------|--------|------|-------|
| ATOM<br>C | 1218 | CA  | GLY C 381 | 23.246 | 45.476 | 35.362 | 1.00 | 29.88 |
| ATOM<br>C | 1219 | C   | GLY C 381 | 23.723 | 44.193 | 34.719 | 1.00 | 29.88 |
| ATOM<br>O | 1220 | O   | GLY C 381 | 23.545 | 44.021 | 33.511 | 1.00 | 29.88 |
| ATOM<br>N | 1221 | N   | VAL C 382 | 24.328 | 43.289 | 35.488 | 1.00 | 31.53 |
| ATOM<br>C | 1222 | CA  | VAL C 382 | 24.757 | 41.990 | 34.992 | 1.00 | 31.53 |
| ATOM<br>C | 1223 | C   | VAL C 382 | 24.382 | 40.942 | 36.024 | 1.00 | 31.53 |
| ATOM<br>O | 1224 | O   | VAL C 382 | 24.165 | 41.241 | 37.199 | 1.00 | 31.53 |
| ATOM<br>C | 1225 | CB  | VAL C 382 | 26.272 | 41.922 | 34.699 | 1.00 | 31.53 |
| ATOM<br>C | 1226 | CG1 | VAL C 382 | 26.621 | 42.766 | 33.493 | 1.00 | 31.53 |
| ATOM<br>C | 1227 | CG2 | VAL C 382 | 27.071 | 42.359 | 35.918 | 1.00 | 31.53 |
| ATOM<br>N | 1228 | N   | SER C 383 | 24.304 | 39.715 | 35.575 | 1.00 | 35.15 |
| ATOM<br>C | 1229 | CA  | SER C 383 | 23.993 | 38.645 | 36.499 | 1.00 | 35.15 |
| ATOM<br>C | 1230 | C   | SER C 383 | 25.213 | 38.302 | 37.349 | 1.00 | 35.15 |
| ATOM<br>O | 1231 | O   | SER C 383 | 26.347 | 38.355 | 36.872 | 1.00 | 35.15 |
| ATOM<br>C | 1232 | CB  | SER C 383 | 23.527 | 37.408 | 35.740 | 1.00 | 35.15 |
| ATOM<br>O | 1233 | OG  | SER C 383 | 23.168 | 36.372 | 36.633 | 1.00 | 35.15 |
| ATOM<br>N | 1234 | N   | PRO C 384 | 25.004 | 37.942 | 38.600 | 1.00 | 35.16 |
| ATOM<br>C | 1235 | CA  | PRO C 384 | 26.133 | 37.598 | 39.471 | 1.00 | 35.16 |
| ATOM<br>C | 1236 | C   | PRO C 384 | 26.652 | 36.182 | 39.276 | 1.00 | 35.16 |
| ATOM<br>O | 1237 | O   | PRO C 384 | 27.310 | 35.652 | 40.173 | 1.00 | 35.16 |
| ATOM<br>C | 1238 | CB  | PRO C 384 | 25.550 | 37.780 | 40.876 | 1.00 | 35.16 |
| ATOM<br>C | 1239 | CG  | PRO C 384 | 24.094 | 37.550 | 40.698 | 1.00 | 35.16 |
| ATOM<br>C | 1240 | CD  | PRO C 384 | 23.752 | 38.105 | 39.356 | 1.00 | 35.16 |
| ATOM<br>N | 1241 | N   | THR C 385 | 26.354 | 35.545 | 38.141 | 1.00 | 39.19 |
| ATOM<br>C | 1242 | CA  | THR C 385 | 26.592 | 34.112 | 37.978 | 1.00 | 39.19 |







|           |      |     |     |   |     |        |        |        |      |       |
|-----------|------|-----|-----|---|-----|--------|--------|--------|------|-------|
| ATOM<br>C | 1318 | CG  | ASN | C | 394 | 38.500 | 50.438 | 29.553 | 1.00 | 35.70 |
| ATOM<br>O | 1319 | OD1 | ASN | C | 394 | 39.722 | 50.339 | 29.612 | 1.00 | 35.70 |
| ATOM<br>N | 1320 | ND2 | ASN | C | 394 | 37.880 | 51.045 | 28.555 | 1.00 | 35.70 |
| ATOM<br>N | 1321 | N   | VAL | C | 395 | 37.902 | 47.713 | 33.115 | 1.00 | 29.17 |
| ATOM<br>C | 1322 | CA  | VAL | C | 395 | 37.404 | 47.474 | 34.462 | 1.00 | 29.17 |
| ATOM<br>C | 1323 | C   | VAL | C | 395 | 37.967 | 48.560 | 35.363 | 1.00 | 29.17 |
| ATOM<br>O | 1324 | O   | VAL | C | 395 | 39.183 | 48.778 | 35.396 | 1.00 | 29.17 |
| ATOM<br>C | 1325 | CB  | VAL | C | 395 | 37.790 | 46.078 | 34.981 | 1.00 | 29.17 |
| ATOM<br>C | 1326 | CG1 | VAL | C | 395 | 37.288 | 45.886 | 36.403 | 1.00 | 29.17 |
| ATOM<br>C | 1327 | CG2 | VAL | C | 395 | 37.232 | 45.002 | 34.072 | 1.00 | 29.17 |
| ATOM<br>N | 1328 | N   | TYR | C | 396 | 37.088 | 49.244 | 36.083 | 1.00 | 24.70 |
| ATOM<br>C | 1329 | CA  | TYR | C | 396 | 37.488 | 50.223 | 37.081 | 1.00 | 24.70 |
| ATOM<br>C | 1330 | C   | TYR | C | 396 | 37.244 | 49.626 | 38.457 | 1.00 | 24.70 |
| ATOM<br>O | 1331 | O   | TYR | C | 396 | 36.155 | 49.122 | 38.727 | 1.00 | 24.70 |
| ATOM<br>C | 1332 | CB  | TYR | C | 396 | 36.711 | 51.529 | 36.925 | 1.00 | 24.70 |
| ATOM<br>C | 1333 | CG  | TYR | C | 396 | 36.718 | 52.087 | 35.524 | 1.00 | 24.70 |
| ATOM<br>C | 1334 | CD1 | TYR | C | 396 | 37.711 | 52.957 | 35.110 | 1.00 | 24.70 |
| ATOM<br>C | 1335 | CD2 | TYR | C | 396 | 35.725 | 51.749 | 34.622 | 1.00 | 24.70 |
| ATOM<br>C | 1336 | CE1 | TYR | C | 396 | 37.719 | 53.469 | 33.830 | 1.00 | 24.70 |
| ATOM<br>C | 1337 | CE2 | TYR | C | 396 | 35.725 | 52.255 | 33.340 | 1.00 | 24.70 |
| ATOM<br>C | 1338 | CZ  | TYR | C | 396 | 36.723 | 53.114 | 32.953 | 1.00 | 24.70 |
| ATOM<br>O | 1339 | OH  | TYR | C | 396 | 36.725 | 53.621 | 31.675 | 1.00 | 24.70 |
| ATOM<br>N | 1340 | N   | ALA | C | 397 | 38.254 | 49.666 | 39.313 | 1.00 | 17.04 |
| ATOM<br>C | 1341 | CA  | ALA | C | 397 | 38.168 | 49.129 | 40.664 | 1.00 | 17.04 |
| ATOM<br>C | 1342 | C   | ALA | C | 397 | 38.365 | 50.276 | 41.646 | 1.00 | 17.04 |



|           |      |     |           |        |        |        |      |       |
|-----------|------|-----|-----------|--------|--------|--------|------|-------|
| ATOM<br>O | 1343 | O   | ALA C 397 | 39.473 | 50.797 | 41.779 | 1.00 | 17.04 |
| ATOM<br>C | 1344 | CB  | ALA C 397 | 39.207 | 48.031 | 40.879 | 1.00 | 17.04 |
| ATOM<br>N | 1345 | N   | ASP C 398 | 37.290 | 50.675 | 42.317 | 1.00 | 13.76 |
| ATOM<br>C | 1346 | CA  | ASP C 398 | 37.322 | 51.713 | 43.336 | 1.00 | 13.76 |
| ATOM<br>C | 1347 | C   | ASP C 398 | 37.308 | 51.048 | 44.704 | 1.00 | 13.76 |
| ATOM<br>O | 1348 | O   | ASP C 398 | 36.585 | 50.080 | 44.913 | 1.00 | 13.76 |
| ATOM<br>C | 1349 | CB  | ASP C 398 | 36.117 | 52.646 | 43.199 | 1.00 | 13.76 |
| ATOM<br>C | 1350 | CG  | ASP C 398 | 35.983 | 53.231 | 41.806 | 1.00 | 13.76 |
| ATOM<br>O | 1351 | OD1 | ASP C 398 | 37.002 | 53.352 | 41.108 | 1.00 | 13.76 |
| ATOM<br>O | 1352 | OD2 | ASP C 398 | 34.857 | 53.577 | 41.418 | 1.00 | 13.76 |
| ATOM<br>N | 1353 | N   | SER C 399 | 38.115 | 51.544 | 45.634 | 1.00 | 10.98 |
| ATOM<br>C | 1354 | CA  | SER C 399 | 38.159 | 50.902 | 46.940 | 1.00 | 10.98 |
| ATOM<br>C | 1355 | C   | SER C 399 | 38.322 | 51.926 | 48.055 | 1.00 | 10.98 |
| ATOM<br>O | 1356 | O   | SER C 399 | 38.963 | 52.978 | 47.880 | 1.00 | 10.98 |
| ATOM<br>C | 1357 | CB  | SER C 399 | 39.272 | 49.844 | 47.013 | 1.00 | 10.98 |
| ATOM<br>O | 1358 | OG  | SER C 399 | 40.530 | 50.380 | 46.660 | 1.00 | 10.98 |
| ATOM<br>N | 1359 | N   | PHE C 400 | 37.713 | 51.593 | 49.201 | 1.00 | 10.21 |
| ATOM<br>C | 1360 | CA  | PHE C 400 | 37.709 | 52.445 | 50.393 | 1.00 | 10.21 |
| ATOM<br>C | 1361 | C   | PHE C 400 | 37.221 | 51.639 | 51.594 | 1.00 | 10.21 |
| ATOM<br>O | 1362 | O   | PHE C 400 | 36.841 | 50.475 | 51.469 | 1.00 | 10.21 |
| ATOM<br>C | 1363 | CB  | PHE C 400 | 36.843 | 53.701 | 50.197 | 1.00 | 10.21 |
| ATOM<br>C | 1364 | CG  | PHE C 400 | 35.505 | 53.436 | 49.561 | 1.00 | 10.21 |
| ATOM<br>C | 1365 | CD1 | PHE C 400 | 34.408 | 53.087 | 50.332 | 1.00 | 10.21 |
| ATOM<br>C | 1366 | CD2 | PHE C 400 | 35.341 | 53.546 | 48.192 | 1.00 | 10.21 |
| ATOM<br>C | 1367 | CE1 | PHE C 400 | 33.176 | 52.851 | 49.744 | 1.00 | 10.21 |

|           |      |     |     |   |     |        |        |        |      |       |
|-----------|------|-----|-----|---|-----|--------|--------|--------|------|-------|
| ATOM<br>C | 1368 | CE2 | PHE | C | 400 | 34.113 | 53.308 | 47.601 | 1.00 | 10.21 |
| ATOM<br>C | 1369 | CZ  | PHE | C | 400 | 33.030 | 52.962 | 48.380 | 1.00 | 10.21 |
| ATOM<br>N | 1370 | N   | VAL | C | 401 | 37.250 | 52.273 | 52.766 | 1.00 | 12.18 |
| ATOM<br>C | 1371 | CA  | VAL | C | 401 | 36.743 | 51.698 | 54.010 | 1.00 | 12.18 |
| ATOM<br>C | 1372 | C   | VAL | C | 401 | 35.562 | 52.534 | 54.488 | 1.00 | 12.18 |
| ATOM<br>O | 1373 | O   | VAL | C | 401 | 35.593 | 53.765 | 54.414 | 1.00 | 12.18 |
| ATOM<br>C | 1374 | CB  | VAL | C | 401 | 37.838 | 51.629 | 55.096 | 1.00 | 12.18 |
| ATOM<br>C | 1375 | CG1 | VAL | C | 401 | 37.259 | 51.178 | 56.432 | 1.00 | 12.18 |
| ATOM<br>C | 1376 | CG2 | VAL | C | 401 | 38.948 | 50.695 | 54.665 | 1.00 | 12.18 |
| ATOM<br>N | 1377 | N   | ILE | C | 402 | 34.520 | 51.864 | 54.981 | 1.00 | 14.54 |
| ATOM<br>C | 1378 | CA  | ILE | C | 402 | 33.300 | 52.532 | 55.420 | 1.00 | 14.54 |
| ATOM<br>C | 1379 | C   | ILE | C | 402 | 32.692 | 51.729 | 56.565 | 1.00 | 14.54 |
| ATOM<br>O | 1380 | O   | ILE | C | 402 | 32.978 | 50.554 | 56.731 | 1.00 | 14.54 |
| ATOM<br>C | 1381 | CB  | ILE | C | 402 | 32.324 | 52.676 | 54.227 | 1.00 | 14.54 |
| ATOM<br>C | 1382 | CG1 | ILE | C | 402 | 31.255 | 53.717 | 54.493 | 1.00 | 14.54 |
| ATOM<br>C | 1383 | CG2 | ILE | C | 402 | 31.715 | 51.346 | 53.853 | 1.00 | 14.54 |
| ATOM<br>C | 1384 | CD1 | ILE | C | 402 | 30.453 | 54.036 | 53.264 | 1.00 | 14.54 |
| ATOM<br>N | 1385 | N   | ARG | C | 403 | 31.844 | 52.367 | 57.365 | 1.00 | 19.81 |
| ATOM<br>C | 1386 | CA  | ARG | C | 403 | 31.139 | 51.642 | 58.420 | 1.00 | 19.81 |
| ATOM<br>C | 1387 | C   | ARG | C | 403 | 30.069 | 50.698 | 57.869 | 1.00 | 19.81 |
| ATOM<br>O | 1388 | O   | ARG | C | 403 | 29.504 | 50.909 | 56.795 | 1.00 | 19.81 |
| ATOM<br>C | 1389 | CB  | ARG | C | 403 | 30.542 | 52.627 | 59.433 | 1.00 | 19.81 |
| ATOM<br>C | 1390 | CG  | ARG | C | 403 | 29.188 | 53.119 | 59.020 | 1.00 | 19.81 |
| ATOM<br>C | 1391 | CD  | ARG | C | 403 | 28.446 | 53.997 | 60.017 | 1.00 | 19.81 |
| ATOM<br>N | 1392 | NE  | ARG | C | 403 | 27.749 | 53.169 | 60.987 | 1.00 | 19.81 |

|           |      |     |     |   |     |        |        |        |      |       |
|-----------|------|-----|-----|---|-----|--------|--------|--------|------|-------|
| ATOM<br>C | 1393 | CZ  | ARG | C | 403 | 27.103 | 53.625 | 62.050 | 1.00 | 19.81 |
| ATOM<br>N | 1394 | NH1 | ARG | C | 403 | 27.060 | 54.924 | 62.308 | 1.00 | 19.81 |
| ATOM<br>N | 1395 | NH2 | ARG | C | 403 | 26.469 | 52.769 | 62.835 | 1.00 | 19.81 |
| ATOM<br>N | 1396 | N   | GLY | C | 404 | 29.794 | 49.641 | 58.641 | 1.00 | 18.41 |
| ATOM<br>C | 1397 | CA  | GLY | C | 404 | 28.975 | 48.540 | 58.156 | 1.00 | 18.41 |
| ATOM<br>C | 1398 | C   | GLY | C | 404 | 27.553 | 48.917 | 57.789 | 1.00 | 18.41 |
| ATOM<br>O | 1399 | O   | GLY | C | 404 | 26.976 | 48.334 | 56.872 | 1.00 | 18.41 |
| ATOM<br>N | 1400 | N   | ASP | C | 405 | 26.964 | 49.876 | 58.501 | 1.00 | 20.72 |
| ATOM<br>C | 1401 | CA  | ASP | C | 405 | 25.618 | 50.326 | 58.158 | 1.00 | 20.72 |
| ATOM<br>C | 1402 | C   | ASP | C | 405 | 25.585 | 51.080 | 56.835 | 1.00 | 20.72 |
| ATOM<br>O | 1403 | O   | ASP | C | 405 | 24.557 | 51.086 | 56.155 | 1.00 | 20.72 |
| ATOM<br>C | 1404 | CB  | ASP | C | 405 | 25.057 | 51.212 | 59.266 | 1.00 | 20.72 |
| ATOM<br>C | 1405 | CG  | ASP | C | 405 | 24.560 | 50.415 | 60.448 | 1.00 | 20.72 |
| ATOM<br>O | 1406 | OD1 | ASP | C | 405 | 24.125 | 49.266 | 60.247 | 1.00 | 20.72 |
| ATOM<br>O | 1407 | OD2 | ASP | C | 405 | 24.611 | 50.939 | 61.577 | 1.00 | 20.72 |
| ATOM<br>N | 1408 | N   | GLU | C | 406 | 26.682 | 51.721 | 56.456 | 1.00 | 18.81 |
| ATOM<br>C | 1409 | CA  | GLU | C | 406 | 26.685 | 52.571 | 55.278 | 1.00 | 18.81 |
| ATOM<br>C | 1410 | C   | GLU | C | 406 | 27.130 | 51.839 | 54.018 | 1.00 | 18.81 |
| ATOM<br>O | 1411 | O   | GLU | C | 406 | 27.186 | 52.453 | 52.951 | 1.00 | 18.81 |
| ATOM<br>C | 1412 | CB  | GLU | C | 406 | 27.542 | 53.808 | 55.557 | 1.00 | 18.81 |
| ATOM<br>C | 1413 | CG  | GLU | C | 406 | 26.949 | 54.604 | 56.719 | 1.00 | 18.81 |
| ATOM<br>C | 1414 | CD  | GLU | C | 406 | 27.511 | 55.991 | 56.870 | 1.00 | 18.81 |
| ATOM<br>O | 1415 | OE1 | GLU | C | 406 | 28.628 | 56.121 | 57.399 | 1.00 | 18.81 |
| ATOM<br>O | 1416 | OE2 | GLU | C | 406 | 26.826 | 56.952 | 56.475 | 1.00 | 18.81 |
| ATOM<br>N | 1417 | N   | VAL | C | 407 | 27.399 | 50.534 | 54.113 | 1.00 | 17.77 |



|           |      |     |     |   |     |        |        |        |      |       |
|-----------|------|-----|-----|---|-----|--------|--------|--------|------|-------|
| ATOM<br>N | 1443 | NE2 | GLN | C | 409 | 22.197 | 54.008 | 53.070 | 1.00 | 20.66 |
| ATOM<br>N | 1444 | N   | ILE | C | 410 | 26.164 | 52.370 | 49.241 | 1.00 | 15.82 |
| ATOM<br>C | 1445 | CA  | ILE | C | 410 | 26.955 | 52.186 | 48.019 | 1.00 | 15.82 |
| ATOM<br>C | 1446 | C   | ILE | C | 410 | 26.065 | 51.414 | 47.052 | 1.00 | 15.82 |
| ATOM<br>O | 1447 | O   | ILE | C | 410 | 26.177 | 50.202 | 46.869 | 1.00 | 15.82 |
| ATOM<br>C | 1448 | CB  | ILE | C | 410 | 28.285 | 51.485 | 48.303 | 1.00 | 15.82 |
| ATOM<br>C | 1449 | CG1 | ILE | C | 410 | 28.966 | 52.136 | 49.514 | 1.00 | 15.82 |
| ATOM<br>C | 1450 | CG2 | ILE | C | 410 | 29.174 | 51.507 | 47.065 | 1.00 | 15.82 |
| ATOM<br>C | 1451 | CD1 | ILE | C | 410 | 29.276 | 53.605 | 49.337 | 1.00 | 15.82 |
| ATOM<br>N | 1452 | N   | ALA | C | 411 | 25.179 | 52.147 | 46.393 | 1.00 | 18.90 |
| ATOM<br>C | 1453 | CA  | ALA | C | 411 | 24.237 | 51.584 | 45.438 | 1.00 | 18.90 |
| ATOM<br>C | 1454 | C   | ALA | C | 411 | 23.683 | 52.724 | 44.601 | 1.00 | 18.90 |
| ATOM<br>O | 1455 | O   | ALA | C | 411 | 23.710 | 53.878 | 45.034 | 1.00 | 18.90 |
| ATOM<br>C | 1456 | CB  | ALA | C | 411 | 23.103 | 50.833 | 46.151 | 1.00 | 18.90 |
| ATOM<br>N | 1457 | N   | PRO | C | 412 | 23.199 | 52.441 | 43.393 | 1.00 | 21.18 |
| ATOM<br>C | 1458 | CA  | PRO | C | 412 | 22.589 | 53.505 | 42.587 | 1.00 | 21.18 |
| ATOM<br>C | 1459 | C   | PRO | C | 412 | 21.345 | 54.072 | 43.258 | 1.00 | 21.18 |
| ATOM<br>O | 1460 | O   | PRO | C | 412 | 20.614 | 53.371 | 43.956 | 1.00 | 21.18 |
| ATOM<br>C | 1461 | CB  | PRO | C | 412 | 22.248 | 52.808 | 41.263 | 1.00 | 21.18 |
| ATOM<br>C | 1462 | CG  | PRO | C | 412 | 22.362 | 51.357 | 41.524 | 1.00 | 21.18 |
| ATOM<br>C | 1463 | CD  | PRO | C | 412 | 23.310 | 51.174 | 42.654 | 1.00 | 21.18 |
| ATOM<br>N | 1464 | N   | GLY | C | 413 | 21.125 | 55.365 | 43.050 | 1.00 | 21.99 |
| ATOM<br>C | 1465 | CA  | GLY | C | 413 | 19.939 | 56.044 | 43.548 | 1.00 | 21.99 |
| ATOM<br>C | 1466 | C   | GLY | C | 413 | 19.825 | 56.177 | 45.052 | 1.00 | 21.99 |
| ATOM<br>O | 1467 | O   | GLY | C | 413 | 18.717 | 56.104 | 45.592 | 1.00 | 21.99 |

|           |      |     |           |        |        |        |      |       |
|-----------|------|-----|-----------|--------|--------|--------|------|-------|
| ATOM<br>N | 1468 | N   | GLN C 414 | 20.939 | 56.386 | 45.745 | 1.00 | 21.99 |
| ATOM<br>C | 1469 | CA  | GLN C 414 | 20.937 | 56.547 | 47.189 | 1.00 | 21.99 |
| ATOM<br>C | 1470 | C   | GLN C 414 | 21.212 | 57.997 | 47.554 | 1.00 | 21.99 |
| ATOM<br>O | 1471 | O   | GLN C 414 | 21.743 | 58.772 | 46.759 | 1.00 | 21.99 |
| ATOM<br>C | 1472 | CB  | GLN C 414 | 21.980 | 55.640 | 47.849 | 1.00 | 21.99 |
| ATOM<br>C | 1473 | CG  | GLN C 414 | 21.716 | 54.165 | 47.678 | 1.00 | 21.99 |
| ATOM<br>C | 1474 | CD  | GLN C 414 | 20.340 | 53.764 | 48.148 | 1.00 | 21.99 |
| ATOM<br>O | 1475 | OE1 | GLN C 414 | 19.993 | 53.944 | 49.310 | 1.00 | 21.99 |
| ATOM<br>N | 1476 | NE2 | GLN C 414 | 19.546 | 53.213 | 47.245 | 1.00 | 21.99 |
| ATOM<br>N | 1477 | N   | THR C 415 | 20.841 | 58.358 | 48.778 | 1.00 | 22.25 |
| ATOM<br>C | 1478 | CA  | THR C 415 | 21.054 | 59.706 | 49.271 | 1.00 | 22.25 |
| ATOM<br>C | 1479 | C   | THR C 415 | 21.491 | 59.639 | 50.727 | 1.00 | 22.25 |
| ATOM<br>O | 1480 | O   | THR C 415 | 21.230 | 58.665 | 51.431 | 1.00 | 22.25 |
| ATOM<br>C | 1481 | CB  | THR C 415 | 19.796 | 60.570 | 49.107 | 1.00 | 22.25 |
| ATOM<br>O | 1482 | OG1 | THR C 415 | 20.128 | 61.943 | 49.336 | 1.00 | 22.25 |
| ATOM<br>C | 1483 | CG2 | THR C 415 | 18.716 | 60.136 | 50.075 | 1.00 | 22.25 |
| ATOM<br>N | 1484 | N   | GLY C 416 | 22.180 | 60.683 | 51.165 | 1.00 | 20.12 |
| ATOM<br>C | 1485 | CA  | GLY C 416 | 22.848 | 60.702 | 52.446 | 1.00 | 20.12 |
| ATOM<br>C | 1486 | C   | GLY C 416 | 24.271 | 61.192 | 52.306 | 1.00 | 20.12 |
| ATOM<br>O | 1487 | O   | GLY C 416 | 24.756 | 61.475 | 51.214 | 1.00 | 20.12 |
| ATOM<br>N | 1488 | N   | LYS C 417 | 24.956 | 61.267 | 53.449 | 1.00 | 19.00 |
| ATOM<br>C | 1489 | CA  | LYS C 417 | 26.261 | 61.922 | 53.501 | 1.00 | 19.00 |
| ATOM<br>C | 1490 | C   | LYS C 417 | 27.276 | 61.245 | 52.582 | 1.00 | 19.00 |
| ATOM<br>O | 1491 | O   | LYS C 417 | 27.982 | 61.917 | 51.825 | 1.00 | 19.00 |
| ATOM<br>C | 1492 | CB  | LYS C 417 | 26.769 | 61.946 | 54.941 | 1.00 | 19.00 |



|           |      |     |     |   |     |        |        |        |      |       |
|-----------|------|-----|-----|---|-----|--------|--------|--------|------|-------|
| ATOM<br>O | 1518 | OE2 | GLU | C | 420 | 22.717 | 62.233 | 48.271 | 1.00 | 21.76 |
| ATOM<br>N | 1519 | N   | TYR | C | 421 | 28.249 | 63.491 | 49.383 | 1.00 | 20.01 |
| ATOM<br>C | 1520 | CA  | TYR | C | 421 | 29.477 | 64.245 | 49.543 | 1.00 | 20.01 |
| ATOM<br>C | 1521 | C   | TYR | C | 421 | 30.760 | 63.437 | 49.417 | 1.00 | 20.01 |
| ATOM<br>O | 1522 | O   | TYR | C | 421 | 31.836 | 64.035 | 49.456 | 1.00 | 20.01 |
| ATOM<br>C | 1523 | CB  | TYR | C | 421 | 29.492 | 64.946 | 50.909 | 1.00 | 20.01 |
| ATOM<br>C | 1524 | CG  | TYR | C | 421 | 28.315 | 65.863 | 51.170 | 1.00 | 20.01 |
| ATOM<br>C | 1525 | CD1 | TYR | C | 421 | 27.759 | 66.626 | 50.153 | 1.00 | 20.01 |
| ATOM<br>C | 1526 | CD2 | TYR | C | 421 | 27.767 | 65.962 | 52.435 | 1.00 | 20.01 |
| ATOM<br>C | 1527 | CE1 | TYR | C | 421 | 26.684 | 67.467 | 50.398 | 1.00 | 20.01 |
| ATOM<br>C | 1528 | CE2 | TYR | C | 421 | 26.696 | 66.798 | 52.687 | 1.00 | 20.01 |
| ATOM<br>C | 1529 | CZ  | TYR | C | 421 | 26.161 | 67.543 | 51.666 | 1.00 | 20.01 |
| ATOM<br>O | 1530 | OH  | TYR | C | 421 | 25.094 | 68.373 | 51.917 | 1.00 | 20.01 |
| ATOM<br>N | 1531 | N   | ASN | C | 422 | 30.701 | 62.109 | 49.322 | 1.00 | 14.94 |
| ATOM<br>C | 1532 | CA  | ASN | C | 422 | 31.929 | 61.317 | 49.305 | 1.00 | 14.94 |
| ATOM<br>C | 1533 | C   | ASN | C | 422 | 32.087 | 60.469 | 48.051 | 1.00 | 14.94 |
| ATOM<br>O | 1534 | O   | ASN | C | 422 | 33.094 | 60.601 | 47.355 | 1.00 | 14.94 |
| ATOM<br>C | 1535 | CB  | ASN | C | 422 | 31.984 | 60.436 | 50.556 | 1.00 | 14.94 |
| ATOM<br>C | 1536 | CG  | ASN | C | 422 | 32.105 | 61.245 | 51.826 | 1.00 | 14.94 |
| ATOM<br>O | 1537 | OD1 | ASN | C | 422 | 33.190 | 61.403 | 52.360 | 1.00 | 14.94 |
| ATOM<br>N | 1538 | ND2 | ASN | C | 422 | 30.986 | 61.759 | 52.313 | 1.00 | 14.94 |
| ATOM<br>N | 1539 | N   | TYR | C | 423 | 31.128 | 59.606 | 47.737 | 1.00 | 12.60 |
| ATOM<br>C | 1540 | CA  | TYR | C | 423 | 31.268 | 58.683 | 46.614 | 1.00 | 12.60 |
| ATOM<br>C | 1541 | C   | TYR | C | 423 | 29.888 | 58.412 | 46.042 | 1.00 | 12.60 |
| ATOM<br>O | 1542 | O   | TYR | C | 423 | 29.019 | 57.890 | 46.740 | 1.00 | 12.60 |







|           |      |     |           |        |        |        |      |       |
|-----------|------|-----|-----------|--------|--------|--------|------|-------|
| ATOM<br>C | 1593 | C   | PHE C 429 | 25.516 | 50.281 | 36.582 | 1.00 | 22.48 |
| ATOM<br>O | 1594 | O   | PHE C 429 | 24.567 | 49.538 | 36.841 | 1.00 | 22.48 |
| ATOM<br>C | 1595 | CB  | PHE C 429 | 25.754 | 51.915 | 38.492 | 1.00 | 22.48 |
| ATOM<br>C | 1596 | CG  | PHE C 429 | 26.917 | 51.128 | 39.020 | 1.00 | 22.48 |
| ATOM<br>C | 1597 | CD1 | PHE C 429 | 28.212 | 51.501 | 38.732 | 1.00 | 22.48 |
| ATOM<br>C | 1598 | CD2 | PHE C 429 | 26.709 | 50.046 | 39.849 | 1.00 | 22.48 |
| ATOM<br>C | 1599 | CE1 | PHE C 429 | 29.275 | 50.792 | 39.239 | 1.00 | 22.48 |
| ATOM<br>C | 1600 | CE2 | PHE C 429 | 27.772 | 49.335 | 40.356 | 1.00 | 22.48 |
| ATOM<br>C | 1601 | CZ  | PHE C 429 | 29.052 | 49.710 | 40.047 | 1.00 | 22.48 |
| ATOM<br>N | 1602 | N   | THR C 430 | 26.613 | 49.859 | 35.954 | 1.00 | 23.67 |
| ATOM<br>C | 1603 | CA  | THR C 430 | 26.867 | 48.457 | 35.637 | 1.00 | 23.67 |
| ATOM<br>C | 1604 | C   | THR C 430 | 28.140 | 48.024 | 36.351 | 1.00 | 23.67 |
| ATOM<br>O | 1605 | O   | THR C 430 | 29.208 | 48.589 | 36.107 | 1.00 | 23.67 |
| ATOM<br>C | 1606 | CB  | THR C 430 | 27.010 | 48.243 | 34.126 | 1.00 | 23.67 |
| ATOM<br>O | 1607 | OG1 | THR C 430 | 25.818 | 48.675 | 33.464 | 1.00 | 23.67 |
| ATOM<br>C | 1608 | CG2 | THR C 430 | 27.250 | 46.777 | 33.814 | 1.00 | 23.67 |
| ATOM<br>N | 1609 | N   | GLY C 431 | 28.032 | 47.021 | 37.208 | 1.00 | 21.79 |
| ATOM<br>C | 1610 | CA  | GLY C 431 | 29.184 | 46.558 | 37.953 | 1.00 | 21.79 |
| ATOM<br>C | 1611 | C   | GLY C 431 | 28.749 | 45.818 | 39.201 | 1.00 | 21.79 |
| ATOM<br>O | 1612 | O   | GLY C 431 | 27.572 | 45.614 | 39.439 | 1.00 | 21.79 |
| ATOM<br>N | 1613 | N   | CYS C 432 | 29.732 | 45.448 | 40.005 | 1.00 | 19.61 |
| ATOM<br>C | 1614 | CA  | CYS C 432 | 29.482 | 44.707 | 41.228 | 1.00 | 19.61 |
| ATOM<br>C | 1615 | C   | CYS C 432 | 30.074 | 45.445 | 42.419 | 1.00 | 19.61 |
| ATOM<br>O | 1616 | O   | CYS C 432 | 31.111 | 46.095 | 42.320 | 1.00 | 19.61 |
| ATOM<br>C | 1617 | CB  | CYS C 432 | 30.058 | 43.285 | 41.157 | 1.00 | 19.61 |

|           |      |     |     |   |     |        |        |        |      |       |
|-----------|------|-----|-----|---|-----|--------|--------|--------|------|-------|
| ATOM<br>S | 1618 | SG  | CYS | C | 432 | 29.386 | 42.286 | 39.791 | 1.00 | 19.61 |
| ATOM<br>N | 1619 | N   | VAL | C | 433 | 29.392 | 45.338 | 43.547 | 1.00 | 15.67 |
| ATOM<br>C | 1620 | CA  | VAL | C | 433 | 29.855 | 45.871 | 44.818 | 1.00 | 15.67 |
| ATOM<br>C | 1621 | C   | VAL | C | 433 | 30.144 | 44.692 | 45.728 | 1.00 | 15.67 |
| ATOM<br>O | 1622 | O   | VAL | C | 433 | 29.275 | 43.841 | 45.942 | 1.00 | 15.67 |
| ATOM<br>C | 1623 | CB  | VAL | C | 433 | 28.811 | 46.809 | 45.448 | 1.00 | 15.67 |
| ATOM<br>C | 1624 | CG1 | VAL | C | 433 | 29.296 | 47.323 | 46.799 | 1.00 | 15.67 |
| ATOM<br>C | 1625 | CG2 | VAL | C | 433 | 28.508 | 47.950 | 44.516 | 1.00 | 15.67 |
| ATOM<br>N | 1626 | N   | ILE | C | 434 | 31.353 | 44.634 | 46.263 | 1.00 | 15.85 |
| ATOM<br>C | 1627 | CA  | ILE | C | 434 | 31.747 | 43.566 | 47.167 | 1.00 | 15.85 |
| ATOM<br>C | 1628 | C   | ILE | C | 434 | 32.347 | 44.186 | 48.417 | 1.00 | 15.85 |
| ATOM<br>O | 1629 | O   | ILE | C | 434 | 33.085 | 45.173 | 48.342 | 1.00 | 15.85 |
| ATOM<br>C | 1630 | CB  | ILE | C | 434 | 32.723 | 42.576 | 46.491 | 1.00 | 15.85 |
| ATOM<br>C | 1631 | CG1 | ILE | C | 434 | 32.967 | 41.357 | 47.386 | 1.00 | 15.85 |
| ATOM<br>C | 1632 | CG2 | ILE | C | 434 | 33.983 | 43.260 | 46.062 | 1.00 | 15.85 |
| ATOM<br>C | 1633 | CD1 | ILE | C | 434 | 32.996 | 40.052 | 46.654 | 1.00 | 15.85 |
| ATOM<br>N | 1634 | N   | ALA | C | 435 | 31.990 | 43.638 | 49.573 | 1.00 | 15.92 |
| ATOM<br>C | 1635 | CA  | ALA | C | 435 | 32.423 | 44.228 | 50.829 | 1.00 | 15.92 |
| ATOM<br>C | 1636 | C   | ALA | C | 435 | 32.631 | 43.136 | 51.864 | 1.00 | 15.92 |
| ATOM<br>O | 1637 | O   | ALA | C | 435 | 31.952 | 42.104 | 51.843 | 1.00 | 15.92 |
| ATOM<br>C | 1638 | CB  | ALA | C | 435 | 31.407 | 45.252 | 51.340 | 1.00 | 15.92 |
| ATOM<br>N | 1639 | N   | TRP | C | 436 | 33.562 | 43.388 | 52.782 | 1.00 | 15.31 |
| ATOM<br>C | 1640 | CA  | TRP | C | 436 | 33.845 | 42.421 | 53.836 | 1.00 | 15.31 |
| ATOM<br>C | 1641 | C   | TRP | C | 436 | 34.234 | 43.132 | 55.123 | 1.00 | 15.31 |
| ATOM<br>O | 1642 | O   | TRP | C | 436 | 34.838 | 44.204 | 55.102 | 1.00 | 15.31 |

|           |      |     |     |   |     |        |        |        |      |       |
|-----------|------|-----|-----|---|-----|--------|--------|--------|------|-------|
| ATOM<br>C | 1643 | CB  | TRP | C | 436 | 34.939 | 41.425 | 53.412 | 1.00 | 15.31 |
| ATOM<br>C | 1644 | CG  | TRP | C | 436 | 36.313 | 41.997 | 53.168 | 1.00 | 15.31 |
| ATOM<br>C | 1645 | CD1 | TRP | C | 436 | 37.369 | 41.964 | 54.021 | 1.00 | 15.31 |
| ATOM<br>C | 1646 | CD2 | TRP | C | 436 | 36.783 | 42.639 | 51.977 | 1.00 | 15.31 |
| ATOM<br>N | 1647 | NE1 | TRP | C | 436 | 38.462 | 42.558 | 53.449 | 1.00 | 15.31 |
| ATOM<br>C | 1648 | CE2 | TRP | C | 436 | 38.128 | 42.982 | 52.192 | 1.00 | 15.31 |
| ATOM<br>C | 1649 | CE3 | TRP | C | 436 | 36.192 | 42.968 | 50.757 | 1.00 | 15.31 |
| ATOM<br>C | 1650 | CZ2 | TRP | C | 436 | 38.891 | 43.637 | 51.235 | 1.00 | 15.31 |
| ATOM<br>C | 1651 | CZ3 | TRP | C | 436 | 36.953 | 43.618 | 49.808 | 1.00 | 15.31 |
| ATOM<br>C | 1652 | CH2 | TRP | C | 436 | 38.288 | 43.942 | 50.051 | 1.00 | 15.31 |
| ATOM<br>N | 1653 | N   | ASN | C | 437 | 33.884 | 42.510 | 56.249 | 1.00 | 18.59 |
| ATOM<br>C | 1654 | CA  | ASN | C | 437 | 34.202 | 43.067 | 57.556 | 1.00 | 18.59 |
| ATOM<br>C | 1655 | C   | ASN | C | 437 | 35.706 | 43.054 | 57.793 | 1.00 | 18.59 |
| ATOM<br>O | 1656 | O   | ASN | C | 437 | 36.395 | 42.088 | 57.463 | 1.00 | 18.59 |
| ATOM<br>C | 1657 | CB  | ASN | C | 437 | 33.483 | 42.280 | 58.657 | 1.00 | 18.59 |
| ATOM<br>C | 1658 | CG  | ASN | C | 437 | 33.714 | 42.862 | 60.036 | 1.00 | 18.59 |
| ATOM<br>O | 1659 | OD1 | ASN | C | 437 | 34.784 | 42.714 | 60.612 | 1.00 | 18.59 |
| ATOM<br>N | 1660 | ND2 | ASN | C | 437 | 32.710 | 43.529 | 60.567 | 1.00 | 18.59 |
| ATOM<br>N | 1661 | N   | SER | C | 438 | 36.214 | 44.135 | 58.376 | 1.00 | 20.64 |
| ATOM<br>C | 1662 | CA  | SER | C | 438 | 37.645 | 44.340 | 58.552 | 1.00 | 20.64 |
| ATOM<br>C | 1663 | C   | SER | C | 438 | 37.976 | 44.736 | 59.987 | 1.00 | 20.64 |
| ATOM<br>O | 1664 | O   | SER | C | 438 | 38.953 | 45.442 | 60.229 | 1.00 | 20.64 |
| ATOM<br>C | 1665 | CB  | SER | C | 438 | 38.150 | 45.399 | 57.572 | 1.00 | 20.64 |
| ATOM<br>O | 1666 | OG  | SER | C | 438 | 39.553 | 45.388 | 57.478 | 1.00 | 20.64 |
| ATOM<br>N | 1667 | N   | ASN | C | 439 | 37.171 | 44.272 | 60.944 | 1.00 | 25.50 |











|           |      |     |           |        |        |        |      |       |
|-----------|------|-----|-----------|--------|--------|--------|------|-------|
| ATOM<br>O | 1768 | OH  | TYR C 451 | 42.354 | 51.115 | 56.949 | 1.00 | 19.56 |
| ATOM<br>N | 1769 | N   | LEU C 452 | 38.349 | 58.771 | 57.307 | 1.00 | 18.47 |
| ATOM<br>C | 1770 | CA  | LEU C 452 | 37.510 | 59.956 | 57.439 | 1.00 | 18.47 |
| ATOM<br>C | 1771 | C   | LEU C 452 | 36.465 | 60.019 | 56.329 | 1.00 | 18.47 |
| ATOM<br>O | 1772 | O   | LEU C 452 | 36.662 | 59.482 | 55.239 | 1.00 | 18.47 |
| ATOM<br>C | 1773 | CB  | LEU C 452 | 38.348 | 61.242 | 57.401 | 1.00 | 18.47 |
| ATOM<br>C | 1774 | CG  | LEU C 452 | 39.435 | 61.416 | 58.460 | 1.00 | 18.47 |
| ATOM<br>C | 1775 | CD1 | LEU C 452 | 40.780 | 61.413 | 57.799 | 1.00 | 18.47 |
| ATOM<br>C | 1776 | CD2 | LEU C 452 | 39.225 | 62.706 | 59.218 | 1.00 | 18.47 |
| ATOM<br>N | 1777 | N   | TYR C 453 | 35.353 | 60.691 | 56.617 | 1.00 | 18.27 |
| ATOM<br>C | 1778 | CA  | TYR C 453 | 34.311 | 60.965 | 55.639 | 1.00 | 18.27 |
| ATOM<br>C | 1779 | C   | TYR C 453 | 33.983 | 62.452 | 55.658 | 1.00 | 18.27 |
| ATOM<br>O | 1780 | O   | TYR C 453 | 34.092 | 63.108 | 56.693 | 1.00 | 18.27 |
| ATOM<br>C | 1781 | CB  | TYR C 453 | 33.039 | 60.125 | 55.904 | 1.00 | 18.27 |
| ATOM<br>C | 1782 | CG  | TYR C 453 | 32.353 | 60.378 | 57.232 | 1.00 | 18.27 |
| ATOM<br>C | 1783 | CD1 | TYR C 453 | 31.233 | 61.186 | 57.312 | 1.00 | 18.27 |
| ATOM<br>C | 1784 | CD2 | TYR C 453 | 32.810 | 59.783 | 58.395 | 1.00 | 18.27 |
| ATOM<br>C | 1785 | CE1 | TYR C 453 | 30.599 | 61.408 | 58.518 | 1.00 | 18.27 |
| ATOM<br>C | 1786 | CE2 | TYR C 453 | 32.182 | 60.003 | 59.605 | 1.00 | 18.27 |
| ATOM<br>C | 1787 | CZ  | TYR C 453 | 31.080 | 60.814 | 59.656 | 1.00 | 18.27 |
| ATOM<br>O | 1788 | OH  | TYR C 453 | 30.454 | 61.033 | 60.861 | 1.00 | 18.27 |
| ATOM<br>N | 1789 | N   | ARG C 454 | 33.594 | 62.987 | 54.504 | 1.00 | 20.12 |
| ATOM<br>C | 1790 | CA  | ARG C 454 | 33.233 | 64.398 | 54.410 | 1.00 | 20.12 |
| ATOM<br>C | 1791 | C   | ARG C 454 | 31.803 | 64.586 | 54.896 | 1.00 | 20.12 |
| ATOM<br>O | 1792 | O   | ARG C 454 | 30.873 | 63.980 | 54.360 | 1.00 | 20.12 |





|           |      |     |           |        |        |        |      |       |
|-----------|------|-----|-----------|--------|--------|--------|------|-------|
| ATOM<br>C | 1843 | CB  | SER C 459 | 27.002 | 71.797 | 45.216 | 1.00 | 31.43 |
| ATOM<br>O | 1844 | OG  | SER C 459 | 28.341 | 71.851 | 44.768 | 1.00 | 31.43 |
| ATOM<br>N | 1845 | N   | ASN C 460 | 26.349 | 68.901 | 45.982 | 1.00 | 27.26 |
| ATOM<br>C | 1846 | CA  | ASN C 460 | 26.527 | 67.459 | 45.892 | 1.00 | 27.26 |
| ATOM<br>C | 1847 | C   | ASN C 460 | 27.600 | 67.091 | 44.874 | 1.00 | 27.26 |
| ATOM<br>O | 1848 | O   | ASN C 460 | 27.783 | 67.761 | 43.857 | 1.00 | 27.26 |
| ATOM<br>C | 1849 | CB  | ASN C 460 | 25.209 | 66.791 | 45.516 | 1.00 | 27.26 |
| ATOM<br>C | 1850 | CG  | ASN C 460 | 24.149 | 66.960 | 46.579 | 1.00 | 27.26 |
| ATOM<br>O | 1851 | OD1 | ASN C 460 | 24.389 | 67.565 | 47.618 | 1.00 | 27.26 |
| ATOM<br>N | 1852 | ND2 | ASN C 460 | 22.970 | 66.418 | 46.325 | 1.00 | 27.26 |
| ATOM<br>N | 1853 | N   | LEU C 461 | 28.316 | 66.004 | 45.163 | 1.00 | 23.51 |
| ATOM<br>C | 1854 | CA  | LEU C 461 | 29.314 | 65.473 | 44.247 | 1.00 | 23.51 |
| ATOM<br>C | 1855 | C   | LEU C 461 | 28.642 | 64.753 | 43.088 | 1.00 | 23.51 |
| ATOM<br>O | 1856 | O   | LEU C 461 | 27.644 | 64.055 | 43.269 | 1.00 | 23.51 |
| ATOM<br>C | 1857 | CB  | LEU C 461 | 30.244 | 64.498 | 44.973 | 1.00 | 23.51 |
| ATOM<br>C | 1858 | CG  | LEU C 461 | 31.590 | 64.973 | 45.507 | 1.00 | 23.51 |
| ATOM<br>C | 1859 | CD1 | LEU C 461 | 32.344 | 63.791 | 46.098 | 1.00 | 23.51 |
| ATOM<br>C | 1860 | CD2 | LEU C 461 | 32.417 | 65.642 | 44.437 | 1.00 | 23.51 |
| ATOM<br>N | 1861 | N   | LYS C 462 | 29.202 | 64.912 | 41.900 | 1.00 | 24.28 |
| ATOM<br>C | 1862 | CA  | LYS C 462 | 28.701 | 64.211 | 40.732 | 1.00 | 24.28 |
| ATOM<br>C | 1863 | C   | LYS C 462 | 29.217 | 62.774 | 40.699 | 1.00 | 24.28 |
| ATOM<br>O | 1864 | O   | LYS C 462 | 30.212 | 62.451 | 41.346 | 1.00 | 24.28 |
| ATOM<br>C | 1865 | CB  | LYS C 462 | 29.113 | 64.954 | 39.466 | 1.00 | 24.28 |
| ATOM<br>C | 1866 | CG  | LYS C 462 | 28.495 | 66.340 | 39.342 | 1.00 | 24.28 |
| ATOM<br>C | 1867 | CD  | LYS C 462 | 28.570 | 66.853 | 37.917 | 1.00 | 24.28 |









|           |      |     |     |   |     |        |        |        |      |       |
|-----------|------|-----|-----|---|-----|--------|--------|--------|------|-------|
| ATOM<br>C | 1943 | CD  | GLU | C | 471 | 39.553 | 75.424 | 49.648 | 1.00 | 44.82 |
| ATOM<br>O | 1944 | OE1 | GLU | C | 471 | 40.201 | 75.173 | 48.612 | 1.00 | 44.82 |
| ATOM<br>O | 1945 | OE2 | GLU | C | 471 | 38.594 | 76.223 | 49.673 | 1.00 | 44.82 |
| ATOM<br>N | 1946 | N   | ILE | C | 472 | 38.069 | 75.015 | 55.066 | 1.00 | 50.35 |
| ATOM<br>C | 1947 | CA  | ILE | C | 472 | 37.063 | 75.192 | 56.104 | 1.00 | 50.35 |
| ATOM<br>C | 1948 | C   | ILE | C | 472 | 35.698 | 75.479 | 55.485 | 1.00 | 50.35 |
| ATOM<br>O | 1949 | O   | ILE | C | 472 | 35.585 | 76.114 | 54.431 | 1.00 | 50.35 |
| ATOM<br>C | 1950 | CB  | ILE | C | 472 | 37.488 | 76.321 | 57.060 | 1.00 | 50.35 |
| ATOM<br>C | 1951 | CG1 | ILE | C | 472 | 38.914 | 76.083 | 57.545 | 1.00 | 50.35 |
| ATOM<br>C | 1952 | CG2 | ILE | C | 472 | 36.553 | 76.408 | 58.250 | 1.00 | 50.35 |
| ATOM<br>C | 1953 | CD1 | ILE | C | 472 | 39.024 | 74.979 | 58.564 | 1.00 | 50.35 |
| ATOM<br>N | 1954 | N   | TYR | C | 473 | 34.651 | 74.999 | 56.148 | 1.00 | 48.20 |
| ATOM<br>C | 1955 | CA  | TYR | C | 473 | 33.276 | 75.139 | 55.693 | 1.00 | 48.20 |
| ATOM<br>C | 1956 | C   | TYR | C | 473 | 32.570 | 76.211 | 56.514 | 1.00 | 48.20 |
| ATOM<br>O | 1957 | O   | TYR | C | 473 | 32.724 | 76.269 | 57.737 | 1.00 | 48.20 |
| ATOM<br>C | 1958 | CB  | TYR | C | 473 | 32.540 | 73.799 | 55.808 | 1.00 | 48.20 |
| ATOM<br>C | 1959 | CG  | TYR | C | 473 | 31.064 | 73.842 | 55.509 | 1.00 | 48.20 |
| ATOM<br>C | 1960 | CD1 | TYR | C | 473 | 30.604 | 73.839 | 54.207 | 1.00 | 48.20 |
| ATOM<br>C | 1961 | CD2 | TYR | C | 473 | 30.130 | 73.850 | 56.532 | 1.00 | 48.20 |
| ATOM<br>C | 1962 | CE1 | TYR | C | 473 | 29.261 | 73.862 | 53.931 | 1.00 | 48.20 |
| ATOM<br>C | 1963 | CE2 | TYR | C | 473 | 28.787 | 73.875 | 56.265 | 1.00 | 48.20 |
| ATOM<br>C | 1964 | CZ  | TYR | C | 473 | 28.357 | 73.882 | 54.962 | 1.00 | 48.20 |
| ATOM<br>O | 1965 | OH  | TYR | C | 473 | 27.014 | 73.904 | 54.685 | 1.00 | 48.20 |
| ATOM<br>N | 1966 | N   | GLN | C | 474 | 31.791 | 77.052 | 55.838 | 1.00 | 63.59 |
| ATOM<br>C | 1967 | CA  | GLN | C | 474 | 31.176 | 78.230 | 56.445 | 1.00 | 63.59 |

|           |      |     |           |        |        |        |      |       |
|-----------|------|-----|-----------|--------|--------|--------|------|-------|
| ATOM<br>C | 1968 | C   | GLN C 474 | 29.667 | 78.045 | 56.498 | 1.00 | 63.59 |
| ATOM<br>O | 1969 | O   | GLN C 474 | 29.004 | 78.032 | 55.457 | 1.00 | 63.59 |
| ATOM<br>C | 1970 | CB  | GLN C 474 | 31.531 | 79.489 | 55.661 | 1.00 | 63.59 |
| ATOM<br>C | 1971 | CG  | GLN C 474 | 32.793 | 80.170 | 56.128 | 1.00 | 63.59 |
| ATOM<br>C | 1972 | CD  | GLN C 474 | 33.905 | 80.066 | 55.120 | 1.00 | 63.59 |
| ATOM<br>O | 1973 | OE1 | GLN C 474 | 33.695 | 80.271 | 53.927 | 1.00 | 63.59 |
| ATOM<br>N | 1974 | NE2 | GLN C 474 | 35.101 | 79.743 | 55.592 | 1.00 | 63.59 |
| ATOM<br>N | 1975 | N   | GLY C 475 | 29.125 | 77.921 | 57.709 | 1.00 | 76.33 |
| ATOM<br>C | 1976 | CA  | GLY C 475 | 27.680 | 77.870 | 57.856 | 1.00 | 76.33 |
| ATOM<br>C | 1977 | C   | GLY C 475 | 27.007 | 79.167 | 57.445 | 1.00 | 76.33 |
| ATOM<br>O | 1978 | O   | GLY C 475 | 25.903 | 79.158 | 56.895 | 1.00 | 76.33 |
| ATOM<br>N | 1979 | N   | SER C 476 | 27.660 | 80.298 | 57.707 | 1.00 | 91.44 |
| ATOM<br>C | 1980 | CA  | SER C 476 | 27.158 | 81.602 | 57.297 | 1.00 | 91.44 |
| ATOM<br>C | 1981 | C   | SER C 476 | 28.341 | 82.540 | 57.089 | 1.00 | 91.44 |
| ATOM<br>O | 1982 | O   | SER C 476 | 29.503 | 82.153 | 57.240 | 1.00 | 91.44 |
| ATOM<br>C | 1983 | CB  | SER C 476 | 26.174 | 82.170 | 58.325 | 1.00 | 91.44 |
| ATOM<br>O | 1984 | OG  | SER C 476 | 25.633 | 83.404 | 57.885 | 1.00 | 91.44 |
| ATOM<br>N | 1985 | N   | THR C 477 | 28.031 | 83.789 | 56.739 | 1.00 | 98.63 |
| ATOM<br>C | 1986 | CA  | THR C 477 | 29.076 | 84.769 | 56.449 | 1.00 | 98.63 |
| ATOM<br>C | 1987 | C   | THR C 477 | 29.979 | 85.088 | 57.638 | 1.00 | 98.63 |
| ATOM<br>O | 1988 | O   | THR C 477 | 31.210 | 85.076 | 57.463 | 1.00 | 98.63 |
| ATOM<br>C | 1989 | CB  | THR C 477 | 28.435 | 86.040 | 55.880 | 1.00 | 98.63 |
| ATOM<br>O | 1990 | OG1 | THR C 477 | 27.215 | 86.321 | 56.576 | 1.00 | 98.63 |
| ATOM<br>C | 1991 | CG2 | THR C 477 | 28.136 | 85.863 | 54.401 | 1.00 | 98.63 |
| ATOM<br>N | 1992 | N   | PRO C 478 | 29.469 | 85.379 | 58.857 | 1.00 | 99.32 |

|           |      |     |           |        |        |        |      |       |
|-----------|------|-----|-----------|--------|--------|--------|------|-------|
| ATOM<br>C | 1993 | CA  | PRO C 478 | 30.372 | 85.846 | 59.920 | 1.00 | 99.32 |
| ATOM<br>C | 1994 | C   | PRO C 478 | 31.273 | 84.747 | 60.459 | 1.00 | 99.32 |
| ATOM<br>O | 1995 | O   | PRO C 478 | 31.038 | 84.216 | 61.549 | 1.00 | 99.32 |
| ATOM<br>C | 1996 | CB  | PRO C 478 | 29.405 | 86.353 | 60.994 | 1.00 | 99.32 |
| ATOM<br>C | 1997 | CG  | PRO C 478 | 28.222 | 85.479 | 60.835 | 1.00 | 99.32 |
| ATOM<br>C | 1998 | CD  | PRO C 478 | 28.083 | 85.265 | 59.352 | 1.00 | 99.32 |
| ATOM<br>N | 1999 | N   | CYS C 479 | 32.316 | 84.405 | 59.709 | 1.00 | 93.30 |
| ATOM<br>C | 2000 | CA  | CYS C 479 | 33.175 | 83.280 | 60.036 | 1.00 | 93.30 |
| ATOM<br>C | 2001 | C   | CYS C 479 | 34.614 | 83.767 | 59.969 | 1.00 | 93.30 |
| ATOM<br>O | 2002 | O   | CYS C 479 | 35.078 | 84.191 | 58.905 | 1.00 | 93.30 |
| ATOM<br>C | 2003 | CB  | CYS C 479 | 32.933 | 82.138 | 59.046 | 1.00 | 93.30 |
| ATOM<br>S | 2004 | SG  | CYS C 479 | 33.010 | 80.428 | 59.634 | 1.00 | 93.30 |
| ATOM<br>N | 2005 | N   | ASN C 480 | 35.315 | 83.718 | 61.098 | 1.00 | 97.56 |
| ATOM<br>C | 2006 | CA  | ASN C 480 | 36.671 | 84.245 | 61.205 | 1.00 | 97.56 |
| ATOM<br>C | 2007 | C   | ASN C 480 | 37.641 | 83.087 | 61.387 | 1.00 | 97.56 |
| ATOM<br>O | 2008 | O   | ASN C 480 | 37.532 | 82.328 | 62.357 | 1.00 | 97.56 |
| ATOM<br>C | 2009 | CB  | ASN C 480 | 36.786 | 85.238 | 62.361 | 1.00 | 97.56 |
| ATOM<br>C | 2010 | CG  | ASN C 480 | 37.310 | 86.587 | 61.917 | 1.00 | 97.56 |
| ATOM<br>O | 2011 | OD1 | ASN C 480 | 37.845 | 86.726 | 60.817 | 1.00 | 97.56 |
| ATOM<br>N | 2012 | ND2 | ASN C 480 | 37.166 | 87.589 | 62.775 | 1.00 | 97.56 |
| ATOM<br>N | 2013 | N   | GLY C 481 | 38.591 | 82.968 | 60.466 | 1.00 | 95.10 |
| ATOM<br>C | 2014 | CA  | GLY C 481 | 39.598 | 81.926 | 60.564 | 1.00 | 95.10 |
| ATOM<br>C | 2015 | C   | GLY C 481 | 38.949 | 80.559 | 60.603 | 1.00 | 95.10 |
| ATOM<br>O | 2016 | O   | GLY C 481 | 38.215 | 80.163 | 59.690 | 1.00 | 95.10 |
| ATOM<br>N | 2017 | N   | VAL C 482 | 39.215 | 79.825 | 61.678 | 1.00 | 93.70 |

|           |      |     |           |        |        |        |      |       |
|-----------|------|-----|-----------|--------|--------|--------|------|-------|
| ATOM<br>C | 2018 | CA  | VAL C 482 | 38.601 | 78.524 | 61.891 | 1.00 | 93.70 |
| ATOM<br>C | 2019 | C   | VAL C 482 | 37.728 | 78.486 | 63.140 | 1.00 | 93.70 |
| ATOM<br>O | 2020 | O   | VAL C 482 | 37.022 | 77.487 | 63.348 | 1.00 | 93.70 |
| ATOM<br>C | 2021 | CB  | VAL C 482 | 39.668 | 77.412 | 61.949 | 1.00 | 93.70 |
| ATOM<br>C | 2022 | CG1 | VAL C 482 | 40.551 | 77.472 | 60.716 | 1.00 | 93.70 |
| ATOM<br>C | 2023 | CG2 | VAL C 482 | 40.507 | 77.557 | 63.197 | 1.00 | 93.70 |
| ATOM<br>N | 2024 | N   | GLU C 483 | 37.749 | 79.526 | 63.971 | 1.00 | 98.63 |
| ATOM<br>C | 2025 | CA  | GLU C 483 | 36.904 | 79.630 | 65.157 | 1.00 | 98.63 |
| ATOM<br>C | 2026 | C   | GLU C 483 | 35.847 | 80.719 | 64.995 | 1.00 | 98.63 |
| ATOM<br>O | 2027 | O   | GLU C 483 | 35.552 | 81.464 | 65.931 | 1.00 | 98.63 |
| ATOM<br>C | 2028 | CB  | GLU C 483 | 37.741 | 79.899 | 66.405 | 1.00 | 98.63 |
| ATOM<br>C | 2029 | CG  | GLU C 483 | 39.136 | 79.298 | 66.397 | 1.00 | 98.63 |
| ATOM<br>C | 2030 | CD  | GLU C 483 | 39.126 | 77.793 | 66.581 | 1.00 | 98.63 |
| ATOM<br>O | 2031 | OE1 | GLU C 483 | 40.146 | 77.147 | 66.264 | 1.00 | 98.63 |
| ATOM<br>O | 2032 | OE2 | GLU C 483 | 38.099 | 77.255 | 67.045 | 1.00 | 98.63 |
| ATOM<br>N | 2033 | N   | GLY C 484 | 35.262 | 80.821 | 63.807 | 1.00 | 94.01 |
| ATOM<br>C | 2034 | CA  | GLY C 484 | 34.343 | 81.902 | 63.516 | 1.00 | 94.01 |
| ATOM<br>C | 2035 | C   | GLY C 484 | 32.910 | 81.650 | 63.932 | 1.00 | 94.01 |
| ATOM<br>O | 2036 | O   | GLY C 484 | 32.001 | 82.343 | 63.464 | 1.00 | 94.01 |
| ATOM<br>N | 2037 | N   | PHE C 485 | 32.694 | 80.624 | 64.761 | 1.00 | 93.62 |
| ATOM<br>C | 2038 | CA  | PHE C 485 | 31.398 | 80.325 | 65.366 | 1.00 | 93.62 |
| ATOM<br>C | 2039 | C   | PHE C 485 | 30.436 | 79.757 | 64.325 | 1.00 | 93.62 |
| ATOM<br>O | 2040 | O   | PHE C 485 | 29.371 | 79.231 | 64.661 | 1.00 | 93.62 |
| ATOM<br>C | 2041 | CB  | PHE C 485 | 30.837 | 81.586 | 66.048 | 1.00 | 93.62 |
| ATOM<br>C | 2042 | CG  | PHE C 485 | 29.348 | 81.586 | 66.219 | 1.00 | 93.62 |

|           |      |     |     |   |     |        |        |        |      |       |
|-----------|------|-----|-----|---|-----|--------|--------|--------|------|-------|
| ATOM<br>C | 2043 | CD1 | PHE | C | 485 | 28.745 | 80.790 | 67.177 | 1.00 | 93.62 |
| ATOM<br>C | 2044 | CD2 | PHE | C | 485 | 28.550 | 82.384 | 65.417 | 1.00 | 93.62 |
| ATOM<br>C | 2045 | CE1 | PHE | C | 485 | 27.373 | 80.791 | 67.332 | 1.00 | 93.62 |
| ATOM<br>C | 2046 | CE2 | PHE | C | 485 | 27.178 | 82.390 | 65.567 | 1.00 | 93.62 |
| ATOM<br>C | 2047 | CZ  | PHE | C | 485 | 26.588 | 81.592 | 66.526 | 1.00 | 93.62 |
| ATOM<br>N | 2048 | N   | ASN | C | 486 | 30.837 | 79.801 | 63.056 | 1.00 | 84.13 |
| ATOM<br>C | 2049 | CA  | ASN | C | 486 | 30.105 | 79.146 | 61.980 | 1.00 | 84.13 |
| ATOM<br>C | 2050 | C   | ASN | C | 486 | 31.051 | 78.365 | 61.078 | 1.00 | 84.13 |
| ATOM<br>O | 2051 | O   | ASN | C | 486 | 30.609 | 77.766 | 60.094 | 1.00 | 84.13 |
| ATOM<br>C | 2052 | CB  | ASN | C | 486 | 29.307 | 80.163 | 61.160 | 1.00 | 84.13 |
| ATOM<br>C | 2053 | CG  | ASN | C | 486 | 27.884 | 80.324 | 61.657 | 1.00 | 84.13 |
| ATOM<br>O | 2054 | OD1 | ASN | C | 486 | 27.334 | 79.433 | 62.303 | 1.00 | 84.13 |
| ATOM<br>N | 2055 | ND2 | ASN | C | 486 | 27.280 | 81.466 | 61.357 | 1.00 | 84.13 |
| ATOM<br>N | 2056 | N   | CYS | C | 487 | 32.345 | 78.381 | 61.387 | 1.00 | 75.18 |
| ATOM<br>C | 2057 | CA  | CYS | C | 487 | 33.355 | 77.652 | 60.635 | 1.00 | 75.18 |
| ATOM<br>C | 2058 | C   | CYS | C | 487 | 33.396 | 76.202 | 61.100 | 1.00 | 75.18 |
| ATOM<br>O | 2059 | O   | CYS | C | 487 | 33.435 | 75.925 | 62.302 | 1.00 | 75.18 |
| ATOM<br>C | 2060 | CB  | CYS | C | 487 | 34.738 | 78.298 | 60.793 | 1.00 | 75.18 |
| ATOM<br>S | 2061 | SG  | CYS | C | 487 | 34.793 | 80.098 | 60.526 | 1.00 | 75.18 |
| ATOM<br>N | 2062 | N   | TYR | C | 488 | 33.381 | 75.278 | 60.140 | 1.00 | 52.10 |
| ATOM<br>C | 2063 | CA  | TYR | C | 488 | 33.433 | 73.851 | 60.423 | 1.00 | 52.10 |
| ATOM<br>C | 2064 | C   | TYR | C | 488 | 34.520 | 73.199 | 59.582 | 1.00 | 52.10 |
| ATOM<br>O | 2065 | O   | TYR | C | 488 | 34.672 | 73.513 | 58.399 | 1.00 | 52.10 |
| ATOM<br>C | 2066 | CB  | TYR | C | 488 | 32.093 | 73.168 | 60.133 | 1.00 | 52.10 |
| ATOM<br>C | 2067 | CG  | TYR | C | 488 | 30.967 | 73.569 | 61.054 | 1.00 | 52.10 |

|           |      |     |     |   |     |        |        |        |      |       |
|-----------|------|-----|-----|---|-----|--------|--------|--------|------|-------|
| ATOM<br>C | 2068 | CD1 | TYR | C | 488 | 31.010 | 73.271 | 62.406 | 1.00 | 52.10 |
| ATOM<br>C | 2069 | CD2 | TYR | C | 488 | 29.856 | 74.235 | 60.566 | 1.00 | 52.10 |
| ATOM<br>C | 2070 | CE1 | TYR | C | 488 | 29.980 | 73.635 | 63.248 | 1.00 | 52.10 |
| ATOM<br>C | 2071 | CE2 | TYR | C | 488 | 28.823 | 74.602 | 61.397 | 1.00 | 52.10 |
| ATOM<br>C | 2072 | CZ  | TYR | C | 488 | 28.889 | 74.299 | 62.736 | 1.00 | 52.10 |
| ATOM<br>O | 2073 | OH  | TYR | C | 488 | 27.857 | 74.665 | 63.566 | 1.00 | 52.10 |
| ATOM<br>N | 2074 | N   | PHE | C | 489 | 35.279 | 72.309 | 60.203 | 1.00 | 34.83 |
| ATOM<br>C | 2075 | CA  | PHE | C | 489 | 36.185 | 71.446 | 59.455 | 1.00 | 34.83 |
| ATOM<br>C | 2076 | C   | PHE | C | 489 | 35.367 | 70.362 | 58.757 | 1.00 | 34.83 |
| ATOM<br>O | 2077 | O   | PHE | C | 489 | 34.584 | 69.672 | 59.414 | 1.00 | 34.83 |
| ATOM<br>C | 2078 | CB  | PHE | C | 489 | 37.214 | 70.822 | 60.390 | 1.00 | 34.83 |
| ATOM<br>C | 2079 | CG  | PHE | C | 489 | 38.315 | 70.092 | 59.683 | 1.00 | 34.83 |
| ATOM<br>C | 2080 | CD1 | PHE | C | 489 | 39.159 | 70.755 | 58.814 | 1.00 | 34.83 |
| ATOM<br>C | 2081 | CD2 | PHE | C | 489 | 38.510 | 68.739 | 59.894 | 1.00 | 34.83 |
| ATOM<br>C | 2082 | CE1 | PHE | C | 489 | 40.173 | 70.083 | 58.168 | 1.00 | 34.83 |
| ATOM<br>C | 2083 | CE2 | PHE | C | 489 | 39.522 | 68.065 | 59.249 | 1.00 | 34.83 |
| ATOM<br>C | 2084 | CZ  | PHE | C | 489 | 40.352 | 68.735 | 58.386 | 1.00 | 34.83 |
| ATOM<br>N | 2085 | N   | PRO | C | 490 | 35.507 | 70.187 | 57.439 | 1.00 | 29.56 |
| ATOM<br>C | 2086 | CA  | PRO | C | 490 | 34.527 | 69.371 | 56.706 | 1.00 | 29.56 |
| ATOM<br>C | 2087 | C   | PRO | C | 490 | 34.671 | 67.868 | 56.883 | 1.00 | 29.56 |
| ATOM<br>O | 2088 | O   | PRO | C | 490 | 33.725 | 67.144 | 56.551 | 1.00 | 29.56 |
| ATOM<br>C | 2089 | CB  | PRO | C | 490 | 34.764 | 69.776 | 55.247 | 1.00 | 29.56 |
| ATOM<br>C | 2090 | CG  | PRO | C | 490 | 36.189 | 70.163 | 55.204 | 1.00 | 29.56 |
| ATOM<br>C | 2091 | CD  | PRO | C | 490 | 36.515 | 70.772 | 56.541 | 1.00 | 29.56 |
| ATOM<br>N | 2092 | N   | LEU | C | 491 | 35.791 | 67.371 | 57.393 | 1.00 | 24.34 |



|           |      |     |           |        |        |        |      |       |
|-----------|------|-----|-----------|--------|--------|--------|------|-------|
| ATOM<br>O | 2118 | O   | TYR C 494 | 34.047 | 56.578 | 64.465 | 1.00 | 20.11 |
| ATOM<br>C | 2119 | CB  | TYR C 494 | 34.653 | 56.048 | 61.346 | 1.00 | 20.11 |
| ATOM<br>C | 2120 | CG  | TYR C 494 | 33.784 | 56.129 | 60.109 | 1.00 | 20.11 |
| ATOM<br>C | 2121 | CD1 | TYR C 494 | 32.416 | 56.302 | 60.209 | 1.00 | 20.11 |
| ATOM<br>C | 2122 | CD2 | TYR C 494 | 34.333 | 55.995 | 58.843 | 1.00 | 20.11 |
| ATOM<br>C | 2123 | CE1 | TYR C 494 | 31.619 | 56.358 | 59.087 | 1.00 | 20.11 |
| ATOM<br>C | 2124 | CE2 | TYR C 494 | 33.543 | 56.049 | 57.716 | 1.00 | 20.11 |
| ATOM<br>C | 2125 | CZ  | TYR C 494 | 32.190 | 56.226 | 57.845 | 1.00 | 20.11 |
| ATOM<br>O | 2126 | OH  | TYR C 494 | 31.392 | 56.279 | 56.729 | 1.00 | 20.11 |
| ATOM<br>N | 2127 | N   | GLY C 495 | 36.235 | 56.841 | 64.035 | 1.00 | 24.70 |
| ATOM<br>C | 2128 | CA  | GLY C 495 | 36.655 | 56.418 | 65.358 | 1.00 | 24.70 |
| ATOM<br>C | 2129 | C   | GLY C 495 | 36.442 | 54.946 | 65.644 | 1.00 | 24.70 |
| ATOM<br>O | 2130 | O   | GLY C 495 | 35.917 | 54.587 | 66.699 | 1.00 | 24.70 |
| ATOM<br>N | 2131 | N   | PHE C 496 | 36.846 | 54.084 | 64.713 | 1.00 | 24.03 |
| ATOM<br>C | 2132 | CA  | PHE C 496 | 36.641 | 52.650 | 64.865 | 1.00 | 24.03 |
| ATOM<br>C | 2133 | C   | PHE C 496 | 37.393 | 52.111 | 66.080 | 1.00 | 24.03 |
| ATOM<br>O | 2134 | O   | PHE C 496 | 38.591 | 52.352 | 66.239 | 1.00 | 24.03 |
| ATOM<br>C | 2135 | CB  | PHE C 496 | 37.108 | 51.917 | 63.606 | 1.00 | 24.03 |
| ATOM<br>C | 2136 | CG  | PHE C 496 | 36.309 | 52.240 | 62.369 | 1.00 | 24.03 |
| ATOM<br>C | 2137 | CD1 | PHE C 496 | 34.940 | 52.060 | 62.341 | 1.00 | 24.03 |
| ATOM<br>C | 2138 | CD2 | PHE C 496 | 36.939 | 52.698 | 61.228 | 1.00 | 24.03 |
| ATOM<br>C | 2139 | CE1 | PHE C 496 | 34.213 | 52.341 | 61.201 | 1.00 | 24.03 |
| ATOM<br>C | 2140 | CE2 | PHE C 496 | 36.214 | 52.982 | 60.088 | 1.00 | 24.03 |
| ATOM<br>C | 2141 | CZ  | PHE C 496 | 34.855 | 52.802 | 60.076 | 1.00 | 24.03 |
| ATOM<br>N | 2142 | N   | GLN C 497 | 36.686 | 51.365 | 66.921 | 1.00 | 32.09 |













|           |      |     |           |        |        |        |      |       |
|-----------|------|-----|-----------|--------|--------|--------|------|-------|
| ATOM<br>N | 2268 | N   | SER C 513 | 33.396 | 48.485 | 38.336 | 1.00 | 23.26 |
| ATOM<br>C | 2269 | CA  | SER C 513 | 32.563 | 48.941 | 37.232 | 1.00 | 23.26 |
| ATOM<br>C | 2270 | C   | SER C 513 | 33.118 | 48.379 | 35.927 | 1.00 | 23.26 |
| ATOM<br>O | 2271 | O   | SER C 513 | 34.335 | 48.347 | 35.731 | 1.00 | 23.26 |
| ATOM<br>C | 2272 | CB  | SER C 513 | 32.509 | 50.464 | 37.181 | 1.00 | 23.26 |
| ATOM<br>O | 2273 | OG  | SER C 513 | 31.453 | 50.899 | 36.351 | 1.00 | 23.26 |
| ATOM<br>N | 2274 | N   | PHE C 514 | 32.225 | 47.957 | 35.030 | 1.00 | 29.30 |
| ATOM<br>C | 2275 | CA  | PHE C 514 | 32.566 | 46.967 | 34.007 | 1.00 | 29.30 |
| ATOM<br>C | 2276 | C   | PHE C 514 | 32.713 | 47.491 | 32.587 | 1.00 | 29.30 |
| ATOM<br>O | 2277 | O   | PHE C 514 | 33.596 | 47.020 | 31.880 | 1.00 | 29.30 |
| ATOM<br>C | 2278 | CB  | PHE C 514 | 31.533 | 45.840 | 34.005 | 1.00 | 29.30 |
| ATOM<br>C | 2279 | CG  | PHE C 514 | 31.727 | 44.863 | 35.111 | 1.00 | 29.30 |
| ATOM<br>C | 2280 | CD1 | PHE C 514 | 32.955 | 44.743 | 35.722 | 1.00 | 29.30 |
| ATOM<br>C | 2281 | CD2 | PHE C 514 | 30.687 | 44.076 | 35.547 | 1.00 | 29.30 |
| ATOM<br>C | 2282 | CE1 | PHE C 514 | 33.143 | 43.855 | 36.745 | 1.00 | 29.30 |
| ATOM<br>C | 2283 | CE2 | PHE C 514 | 30.872 | 43.187 | 36.569 | 1.00 | 29.30 |
| ATOM<br>C | 2284 | CZ  | PHE C 514 | 32.102 | 43.074 | 37.168 | 1.00 | 29.30 |
| ATOM<br>N | 2285 | N   | GLU C 515 | 31.852 | 48.379 | 32.101 | 1.00 | 37.37 |
| ATOM<br>C | 2286 | CA  | GLU C 515 | 32.015 | 48.955 | 30.757 | 1.00 | 37.37 |
| ATOM<br>C | 2287 | C   | GLU C 515 | 32.280 | 47.881 | 29.695 | 1.00 | 37.37 |
| ATOM<br>O | 2288 | O   | GLU C 515 | 33.368 | 47.782 | 29.132 | 1.00 | 37.37 |
| ATOM<br>C | 2289 | CB  | GLU C 515 | 33.138 | 49.994 | 30.739 | 1.00 | 37.37 |
| ATOM<br>C | 2290 | CG  | GLU C 515 | 32.880 | 51.158 | 29.812 | 1.00 | 37.37 |
| ATOM<br>C | 2291 | CD  | GLU C 515 | 34.004 | 52.166 | 29.826 | 1.00 | 37.37 |
| ATOM<br>O | 2292 | OE1 | GLU C 515 | 35.120 | 51.821 | 29.391 | 1.00 | 37.37 |

|           |      |     |     |   |     |        |        |        |      |       |
|-----------|------|-----|-----|---|-----|--------|--------|--------|------|-------|
| ATOM<br>O | 2293 | OE2 | GLU | C | 515 | 33.773 | 53.309 | 30.263 | 1.00 | 37.37 |
| ATOM<br>N | 2294 | N   | LEU | C | 516 | 31.270 | 47.048 | 29.467 | 1.00 | 43.16 |
| ATOM<br>C | 2295 | CA  | LEU | C | 516 | 31.363 | 45.995 | 28.456 | 1.00 | 43.16 |
| ATOM<br>C | 2296 | C   | LEU | C | 516 | 31.651 | 46.567 | 27.071 | 1.00 | 43.16 |
| ATOM<br>O | 2297 | O   | LEU | C | 516 | 32.262 | 45.908 | 26.231 | 1.00 | 43.16 |
| ATOM<br>C | 2298 | CB  | LEU | C | 516 | 30.075 | 45.174 | 28.411 | 1.00 | 43.16 |
| ATOM<br>C | 2299 | CG  | LEU | C | 516 | 29.627 | 44.538 | 29.724 | 1.00 | 43.16 |
| ATOM<br>C | 2300 | CD1 | LEU | C | 516 | 28.425 | 45.273 | 30.272 | 1.00 | 43.16 |
| ATOM<br>C | 2301 | CD2 | LEU | C | 516 | 29.304 | 43.076 | 29.515 | 1.00 | 43.16 |
| TER       | 2302 |     | LEU | C | 516 |        |        |        |      |       |
| ATOM<br>N | 2303 | N   | GLN | A | 1   | 59.036 | 47.697 | 74.253 | 1.00 | 56.72 |
| ATOM<br>C | 2304 | CA  | GLN | A | 1   | 59.634 | 46.556 | 74.935 | 1.00 | 56.72 |
| ATOM<br>C | 2305 | C   | GLN | A | 1   | 59.618 | 45.333 | 74.018 | 1.00 | 56.72 |
| ATOM<br>O | 2306 | O   | GLN | A | 1   | 60.017 | 44.236 | 74.409 | 1.00 | 56.72 |
| ATOM<br>C | 2307 | CB  | GLN | A | 1   | 58.897 | 46.276 | 76.252 | 1.00 | 56.72 |
| ATOM<br>C | 2308 | CG  | GLN | A | 1   | 59.506 | 45.188 | 77.140 | 1.00 | 56.72 |
| ATOM<br>C | 2309 | CD  | GLN | A | 1   | 60.985 | 45.395 | 77.432 | 1.00 | 56.72 |
| ATOM<br>O | 2310 | OE1 | GLN | A | 1   | 61.514 | 46.501 | 77.313 | 1.00 | 56.72 |
| ATOM<br>N | 2311 | NE2 | GLN | A | 1   | 61.661 | 44.318 | 77.812 | 1.00 | 56.72 |
| ATOM<br>N | 2312 | N   | VAL | A | 2   | 59.169 | 45.536 | 72.779 | 1.00 | 48.14 |
| ATOM<br>C | 2313 | CA  | VAL | A | 2   | 59.157 | 44.442 | 71.819 | 1.00 | 48.14 |
| ATOM<br>C | 2314 | C   | VAL | A | 2   | 60.583 | 43.968 | 71.568 | 1.00 | 48.14 |
| ATOM<br>O | 2315 | O   | VAL | A | 2   | 61.535 | 44.759 | 71.550 | 1.00 | 48.14 |
| ATOM<br>C | 2316 | CB  | VAL | A | 2   | 58.454 | 44.872 | 70.520 | 1.00 | 48.14 |
| ATOM<br>C | 2317 | CG1 | VAL | A | 2   | 57.194 | 45.649 | 70.846 | 1.00 | 48.14 |
| ATOM      | 2318 | CG2 | VAL | A | 2   | 59.371 | 45.704 | 69.653 | 1.00 | 48.14 |

|      |      |     |     |   |   |        |        |        |      |       |
|------|------|-----|-----|---|---|--------|--------|--------|------|-------|
| C    |      |     |     |   |   |        |        |        |      |       |
| ATOM | 2319 | N   | GLN | A | 3 | 60.738 | 42.658 | 71.416 | 1.00 | 45.04 |
| N    |      |     |     |   |   |        |        |        |      |       |
| ATOM | 2320 | CA  | GLN | A | 3 | 62.036 | 42.028 | 71.232 | 1.00 | 45.04 |
| C    |      |     |     |   |   |        |        |        |      |       |
| ATOM | 2321 | C   | GLN | A | 3 | 61.928 | 40.979 | 70.139 | 1.00 | 45.04 |
| C    |      |     |     |   |   |        |        |        |      |       |
| ATOM | 2322 | O   | GLN | A | 3 | 61.016 | 40.148 | 70.163 | 1.00 | 45.04 |
| O    |      |     |     |   |   |        |        |        |      |       |
| ATOM | 2323 | CB  | GLN | A | 3 | 62.523 | 41.374 | 72.528 | 1.00 | 45.04 |
| C    |      |     |     |   |   |        |        |        |      |       |
| ATOM | 2324 | CG  | GLN | A | 3 | 63.951 | 41.699 | 72.902 | 1.00 | 45.04 |
| C    |      |     |     |   |   |        |        |        |      |       |
| ATOM | 2325 | CD  | GLN | A | 3 | 64.259 | 43.179 | 72.824 | 1.00 | 45.04 |
| C    |      |     |     |   |   |        |        |        |      |       |
| ATOM | 2326 | OE1 | GLN | A | 3 | 63.481 | 44.012 | 73.286 | 1.00 | 45.04 |
| O    |      |     |     |   |   |        |        |        |      |       |
| ATOM | 2327 | NE2 | GLN | A | 3 | 65.396 | 43.515 | 72.230 | 1.00 | 45.04 |
| N    |      |     |     |   |   |        |        |        |      |       |
| ATOM | 2328 | N   | LEU | A | 4 | 62.854 | 41.017 | 69.187 | 1.00 | 36.15 |
| N    |      |     |     |   |   |        |        |        |      |       |
| ATOM | 2329 | CA  | LEU | A | 4 | 62.978 | 39.991 | 68.162 | 1.00 | 36.15 |
| C    |      |     |     |   |   |        |        |        |      |       |
| ATOM | 2330 | C   | LEU | A | 4 | 64.411 | 39.494 | 68.164 | 1.00 | 36.15 |
| C    |      |     |     |   |   |        |        |        |      |       |
| ATOM | 2331 | O   | LEU | A | 4 | 65.343 | 40.290 | 68.026 | 1.00 | 36.15 |
| O    |      |     |     |   |   |        |        |        |      |       |
| ATOM | 2332 | CB  | LEU | A | 4 | 62.603 | 40.528 | 66.779 | 1.00 | 36.15 |
| C    |      |     |     |   |   |        |        |        |      |       |
| ATOM | 2333 | CG  | LEU | A | 4 | 61.179 | 41.049 | 66.608 | 1.00 | 36.15 |
| C    |      |     |     |   |   |        |        |        |      |       |
| ATOM | 2334 | CD1 | LEU | A | 4 | 61.044 | 41.806 | 65.301 | 1.00 | 36.15 |
| C    |      |     |     |   |   |        |        |        |      |       |
| ATOM | 2335 | CD2 | LEU | A | 4 | 60.207 | 39.898 | 66.650 | 1.00 | 36.15 |
| C    |      |     |     |   |   |        |        |        |      |       |
| ATOM | 2336 | N   | VAL | A | 5 | 64.589 | 38.188 | 68.317 | 1.00 | 33.49 |
| N    |      |     |     |   |   |        |        |        |      |       |
| ATOM | 2337 | CA  | VAL | A | 5 | 65.906 | 37.580 | 68.439 | 1.00 | 33.49 |
| C    |      |     |     |   |   |        |        |        |      |       |
| ATOM | 2338 | C   | VAL | A | 5 | 66.115 | 36.674 | 67.237 | 1.00 | 33.49 |
| C    |      |     |     |   |   |        |        |        |      |       |
| ATOM | 2339 | O   | VAL | A | 5 | 65.442 | 35.646 | 67.105 | 1.00 | 33.49 |
| O    |      |     |     |   |   |        |        |        |      |       |
| ATOM | 2340 | CB  | VAL | A | 5 | 66.052 | 36.798 | 69.749 | 1.00 | 33.49 |
| C    |      |     |     |   |   |        |        |        |      |       |
| ATOM | 2341 | CG1 | VAL | A | 5 | 67.421 | 36.150 | 69.828 | 1.00 | 33.49 |
| C    |      |     |     |   |   |        |        |        |      |       |
| ATOM | 2342 | CG2 | VAL | A | 5 | 65.815 | 37.714 | 70.938 | 1.00 | 33.49 |
| C    |      |     |     |   |   |        |        |        |      |       |
| ATOM | 2343 | N   | GLU | A | 6 | 67.040 | 37.054 | 66.362 | 1.00 | 31.93 |



|      |      |     |     |   |    |        |        |        |      |       |
|------|------|-----|-----|---|----|--------|--------|--------|------|-------|
| N    |      |     |     |   |    |        |        |        |      |       |
| ATOM | 2344 | CA  | GLU | A | 6  | 67.342 | 36.263 | 65.181 | 1.00 | 31.93 |
| C    |      |     |     |   |    |        |        |        |      |       |
| ATOM | 2345 | C   | GLU | A | 6  | 68.316 | 35.145 | 65.527 | 1.00 | 31.93 |
| C    |      |     |     |   |    |        |        |        |      |       |
| ATOM | 2346 | O   | GLU | A | 6  | 69.078 | 35.234 | 66.491 | 1.00 | 31.93 |
| O    |      |     |     |   |    |        |        |        |      |       |
| ATOM | 2347 | CB  | GLU | A | 6  | 67.926 | 37.149 | 64.082 | 1.00 | 31.93 |
| C    |      |     |     |   |    |        |        |        |      |       |
| ATOM | 2348 | CG  | GLU | A | 6  | 66.912 | 38.049 | 63.412 | 1.00 | 31.93 |
| C    |      |     |     |   |    |        |        |        |      |       |
| ATOM | 2349 | CD  | GLU | A | 6  | 67.099 | 39.506 | 63.763 | 1.00 | 31.93 |
| C    |      |     |     |   |    |        |        |        |      |       |
| ATOM | 2350 | OE1 | GLU | A | 6  | 67.861 | 39.801 | 64.703 | 1.00 | 31.93 |
| O    |      |     |     |   |    |        |        |        |      |       |
| ATOM | 2351 | OE2 | GLU | A | 6  | 66.480 | 40.360 | 63.101 | 1.00 | 31.93 |
| O    |      |     |     |   |    |        |        |        |      |       |
| ATOM | 2352 | N   | SER | A | 7  | 68.276 | 34.078 | 64.734 | 1.00 | 33.01 |
| N    |      |     |     |   |    |        |        |        |      |       |
| ATOM | 2353 | CA  | SER | A | 7  | 69.133 | 32.925 | 64.963 | 1.00 | 33.01 |
| C    |      |     |     |   |    |        |        |        |      |       |
| ATOM | 2354 | C   | SER | A | 7  | 69.233 | 32.124 | 63.678 | 1.00 | 33.01 |
| C    |      |     |     |   |    |        |        |        |      |       |
| ATOM | 2355 | O   | SER | A | 7  | 68.350 | 32.174 | 62.817 | 1.00 | 33.01 |
| O    |      |     |     |   |    |        |        |        |      |       |
| ATOM | 2356 | CB  | SER | A | 7  | 68.609 | 32.044 | 66.098 | 1.00 | 33.01 |
| C    |      |     |     |   |    |        |        |        |      |       |
| ATOM | 2357 | OG  | SER | A | 7  | 68.604 | 32.747 | 67.326 | 1.00 | 33.01 |
| O    |      |     |     |   |    |        |        |        |      |       |
| ATOM | 2358 | N   | GLY | A | 8  | 70.301 | 31.347 | 63.586 | 1.00 | 33.45 |
| N    |      |     |     |   |    |        |        |        |      |       |
| ATOM | 2359 | CA  | GLY | A | 8  | 70.669 | 30.718 | 62.340 | 1.00 | 33.45 |
| C    |      |     |     |   |    |        |        |        |      |       |
| ATOM | 2360 | C   | GLY | A | 8  | 71.530 | 31.640 | 61.512 | 1.00 | 33.45 |
| C    |      |     |     |   |    |        |        |        |      |       |
| ATOM | 2361 | O   | GLY | A | 8  | 71.757 | 32.806 | 61.838 | 1.00 | 33.45 |
| O    |      |     |     |   |    |        |        |        |      |       |
| ATOM | 2362 | N   | GLY | A | 9  | 72.070 | 31.088 | 60.438 | 1.00 | 36.48 |
| N    |      |     |     |   |    |        |        |        |      |       |
| ATOM | 2363 | CA  | GLY | A | 9  | 72.768 | 31.902 | 59.467 | 1.00 | 36.48 |
| C    |      |     |     |   |    |        |        |        |      |       |
| ATOM | 2364 | C   | GLY | A | 9  | 74.243 | 32.071 | 59.757 | 1.00 | 36.48 |
| C    |      |     |     |   |    |        |        |        |      |       |
| ATOM | 2365 | O   | GLY | A | 9  | 74.624 | 32.796 | 60.679 | 1.00 | 36.48 |
| O    |      |     |     |   |    |        |        |        |      |       |
| ATOM | 2366 | N   | THR | A | 10 | 75.077 | 31.447 | 58.934 | 1.00 | 42.78 |
| N    |      |     |     |   |    |        |        |        |      |       |
| ATOM | 2367 | CA  | THR | A | 10 | 76.534 | 31.465 | 59.017 | 1.00 | 42.78 |
| C    |      |     |     |   |    |        |        |        |      |       |
| ATOM | 2368 | C   | THR | A | 10 | 77.056 | 31.211 | 57.610 | 1.00 | 42.78 |

|      |      |     |     |   |    |        |        |        |      |       |
|------|------|-----|-----|---|----|--------|--------|--------|------|-------|
| C    |      |     |     |   |    |        |        |        |      |       |
| ATOM | 2369 | O   | THR | A | 10 | 76.318 | 31.360 | 56.630 | 1.00 | 42.78 |
| O    |      |     |     |   |    |        |        |        |      |       |
| ATOM | 2370 | CB  | THR | A | 10 | 77.078 | 30.408 | 60.000 | 1.00 | 42.78 |
| C    |      |     |     |   |    |        |        |        |      |       |
| ATOM | 2371 | OG1 | THR | A | 10 | 76.760 | 29.094 | 59.522 | 1.00 | 42.78 |
| O    |      |     |     |   |    |        |        |        |      |       |
| ATOM | 2372 | CG2 | THR | A | 10 | 76.564 | 30.590 | 61.427 | 1.00 | 42.78 |
| C    |      |     |     |   |    |        |        |        |      |       |
| ATOM | 2373 | N   | VAL | A | 11 | 78.332 | 30.842 | 57.507 | 1.00 | 42.87 |
| N    |      |     |     |   |    |        |        |        |      |       |
| ATOM | 2374 | CA  | VAL | A | 11 | 78.849 | 30.383 | 56.231 | 1.00 | 42.87 |
| C    |      |     |     |   |    |        |        |        |      |       |
| ATOM | 2375 | C   | VAL | A | 11 | 78.095 | 29.128 | 55.816 | 1.00 | 42.87 |
| C    |      |     |     |   |    |        |        |        |      |       |
| ATOM | 2376 | O   | VAL | A | 11 | 77.649 | 28.336 | 56.653 | 1.00 | 42.87 |
| O    |      |     |     |   |    |        |        |        |      |       |
| ATOM | 2377 | CB  | VAL | A | 11 | 80.361 | 30.121 | 56.318 | 1.00 | 42.87 |
| C    |      |     |     |   |    |        |        |        |      |       |
| ATOM | 2378 | CG1 | VAL | A | 11 | 80.965 | 30.071 | 54.935 | 1.00 | 42.87 |
| C    |      |     |     |   |    |        |        |        |      |       |
| ATOM | 2379 | CG2 | VAL | A | 11 | 81.027 | 31.191 | 57.157 | 1.00 | 42.87 |
| C    |      |     |     |   |    |        |        |        |      |       |
| ATOM | 2380 | N   | LEU | A | 12 | 77.935 | 28.951 | 54.510 | 1.00 | 44.63 |
| N    |      |     |     |   |    |        |        |        |      |       |
| ATOM | 2381 | CA  | LEU | A | 12 | 77.215 | 27.798 | 53.996 | 1.00 | 44.63 |
| C    |      |     |     |   |    |        |        |        |      |       |
| ATOM | 2382 | C   | LEU | A | 12 | 77.733 | 27.467 | 52.607 | 1.00 | 44.63 |
| C    |      |     |     |   |    |        |        |        |      |       |
| ATOM | 2383 | O   | LEU | A | 12 | 77.819 | 28.348 | 51.749 | 1.00 | 44.63 |
| O    |      |     |     |   |    |        |        |        |      |       |
| ATOM | 2384 | CB  | LEU | A | 12 | 75.708 | 28.059 | 53.953 | 1.00 | 44.63 |
| C    |      |     |     |   |    |        |        |        |      |       |
| ATOM | 2385 | CG  | LEU | A | 12 | 74.917 | 26.835 | 53.509 | 1.00 | 44.63 |
| C    |      |     |     |   |    |        |        |        |      |       |
| ATOM | 2386 | CD1 | LEU | A | 12 | 73.954 | 26.398 | 54.592 | 1.00 | 44.63 |
| C    |      |     |     |   |    |        |        |        |      |       |
| ATOM | 2387 | CD2 | LEU | A | 12 | 74.190 | 27.112 | 52.214 | 1.00 | 44.63 |
| C    |      |     |     |   |    |        |        |        |      |       |
| ATOM | 2388 | N   | GLN | A | 13 | 78.074 | 26.202 | 52.395 | 1.00 | 48.35 |
| N    |      |     |     |   |    |        |        |        |      |       |
| ATOM | 2389 | CA  | GLN | A | 13 | 78.584 | 25.782 | 51.105 | 1.00 | 48.35 |
| C    |      |     |     |   |    |        |        |        |      |       |
| ATOM | 2390 | C   | GLN | A | 13 | 77.481 | 25.853 | 50.052 | 1.00 | 48.35 |
| C    |      |     |     |   |    |        |        |        |      |       |
| ATOM | 2391 | O   | GLN | A | 13 | 76.314 | 25.595 | 50.349 | 1.00 | 48.35 |
| O    |      |     |     |   |    |        |        |        |      |       |
| ATOM | 2392 | CB  | GLN | A | 13 | 79.138 | 24.364 | 51.189 | 1.00 | 48.35 |
| C    |      |     |     |   |    |        |        |        |      |       |
| ATOM | 2393 | CG  | GLN | A | 13 | 79.819 | 24.052 | 52.511 | 1.00 | 48.35 |

|      |      |     |     |   |    |        |        |        |      |       |
|------|------|-----|-----|---|----|--------|--------|--------|------|-------|
| C    |      |     |     |   |    |        |        |        |      |       |
| ATOM | 2394 | CD  | GLN | A | 13 | 80.979 | 24.983 | 52.812 | 1.00 | 48.35 |
| C    |      |     |     |   |    |        |        |        |      |       |
| ATOM | 2395 | OE1 | GLN | A | 13 | 81.627 | 25.499 | 51.904 | 1.00 | 48.35 |
| O    |      |     |     |   |    |        |        |        |      |       |
| ATOM | 2396 | NE2 | GLN | A | 13 | 81.245 | 25.201 | 54.093 | 1.00 | 48.35 |
| N    |      |     |     |   |    |        |        |        |      |       |
| ATOM | 2397 | N   | PRO | A | 14 | 77.828 | 26.203 | 48.816 | 1.00 | 48.21 |
| N    |      |     |     |   |    |        |        |        |      |       |
| ATOM | 2398 | CA  | PRO | A | 14 | 76.801 | 26.377 | 47.783 | 1.00 | 48.21 |
| C    |      |     |     |   |    |        |        |        |      |       |
| ATOM | 2399 | C   | PRO | A | 14 | 75.980 | 25.114 | 47.577 | 1.00 | 48.21 |
| C    |      |     |     |   |    |        |        |        |      |       |
| ATOM | 2400 | O   | PRO | A | 14 | 76.490 | 23.995 | 47.663 | 1.00 | 48.21 |
| O    |      |     |     |   |    |        |        |        |      |       |
| ATOM | 2401 | CB  | PRO | A | 14 | 77.615 | 26.728 | 46.534 | 1.00 | 48.21 |
| C    |      |     |     |   |    |        |        |        |      |       |
| ATOM | 2402 | CG  | PRO | A | 14 | 78.869 | 27.321 | 47.067 | 1.00 | 48.21 |
| C    |      |     |     |   |    |        |        |        |      |       |
| ATOM | 2403 | CD  | PRO | A | 14 | 79.165 | 26.593 | 48.339 | 1.00 | 48.21 |
| C    |      |     |     |   |    |        |        |        |      |       |
| ATOM | 2404 | N   | GLY | A | 15 | 74.691 | 25.308 | 47.313 | 1.00 | 47.60 |
| N    |      |     |     |   |    |        |        |        |      |       |
| ATOM | 2405 | CA  | GLY | A | 15 | 73.770 | 24.224 | 47.081 | 1.00 | 47.60 |
| C    |      |     |     |   |    |        |        |        |      |       |
| ATOM | 2406 | C   | GLY | A | 15 | 73.120 | 23.657 | 48.325 | 1.00 | 47.60 |
| C    |      |     |     |   |    |        |        |        |      |       |
| ATOM | 2407 | O   | GLY | A | 15 | 72.116 | 22.948 | 48.210 | 1.00 | 47.60 |
| O    |      |     |     |   |    |        |        |        |      |       |
| ATOM | 2408 | N   | ARG | A | 16 | 73.652 | 23.954 | 49.506 | 1.00 | 47.46 |
| N    |      |     |     |   |    |        |        |        |      |       |
| ATOM | 2409 | CA  | ARG | A | 16 | 73.078 | 23.444 | 50.739 | 1.00 | 47.46 |
| C    |      |     |     |   |    |        |        |        |      |       |
| ATOM | 2410 | C   | ARG | A | 16 | 71.800 | 24.204 | 51.093 | 1.00 | 47.46 |
| C    |      |     |     |   |    |        |        |        |      |       |
| ATOM | 2411 | O   | ARG | A | 16 | 71.491 | 25.257 | 50.531 | 1.00 | 47.46 |
| O    |      |     |     |   |    |        |        |        |      |       |
| ATOM | 2412 | CB  | ARG | A | 16 | 74.087 | 23.546 | 51.881 | 1.00 | 47.46 |
| C    |      |     |     |   |    |        |        |        |      |       |
| ATOM | 2413 | CG  | ARG | A | 16 | 75.351 | 22.734 | 51.681 | 1.00 | 47.46 |
| C    |      |     |     |   |    |        |        |        |      |       |
| ATOM | 2414 | CD  | ARG | A | 16 | 75.060 | 21.386 | 51.038 | 1.00 | 47.46 |
| C    |      |     |     |   |    |        |        |        |      |       |
| ATOM | 2415 | NE  | ARG | A | 16 | 76.192 | 20.822 | 50.296 | 1.00 | 47.46 |
| N    |      |     |     |   |    |        |        |        |      |       |
| ATOM | 2416 | CZ  | ARG | A | 16 | 77.436 | 20.673 | 50.754 | 1.00 | 47.46 |
| C    |      |     |     |   |    |        |        |        |      |       |
| ATOM | 2417 | NH1 | ARG | A | 16 | 77.763 | 21.004 | 51.998 | 1.00 | 47.46 |
| N    |      |     |     |   |    |        |        |        |      |       |
| ATOM | 2418 | NH2 | ARG | A | 16 | 78.361 | 20.152 | 49.961 | 1.00 | 47.46 |

|      |      |     |     |   |    |        |        |        |            |
|------|------|-----|-----|---|----|--------|--------|--------|------------|
| N    |      |     |     |   |    |        |        |        |            |
| ATOM | 2419 | N   | SER | A | 17 | 71.049 | 23.648 | 52.036 | 1.00 41.01 |
| N    |      |     |     |   |    |        |        |        |            |
| ATOM | 2420 | CA  | SER | A | 17 | 69.841 | 24.270 | 52.555 | 1.00 41.01 |
| C    |      |     |     |   |    |        |        |        |            |
| ATOM | 2421 | C   | SER | A | 17 | 70.122 | 24.887 | 53.916 | 1.00 41.01 |
| C    |      |     |     |   |    |        |        |        |            |
| ATOM | 2422 | O   | SER | A | 17 | 71.021 | 24.457 | 54.641 | 1.00 41.01 |
| O    |      |     |     |   |    |        |        |        |            |
| ATOM | 2423 | CB  | SER | A | 17 | 68.703 | 23.255 | 52.669 | 1.00 41.01 |
| C    |      |     |     |   |    |        |        |        |            |
| ATOM | 2424 | OG  | SER | A | 17 | 68.137 | 22.980 | 51.403 | 1.00 41.01 |
| O    |      |     |     |   |    |        |        |        |            |
| ATOM | 2425 | N   | LEU | A | 18 | 69.346 | 25.912 | 54.257 | 1.00 35.63 |
| N    |      |     |     |   |    |        |        |        |            |
| ATOM | 2426 | CA  | LEU | A | 18 | 69.543 | 26.612 | 55.515 | 1.00 35.63 |
| C    |      |     |     |   |    |        |        |        |            |
| ATOM | 2427 | C   | LEU | A | 18 | 68.187 | 27.040 | 56.052 | 1.00 35.63 |
| C    |      |     |     |   |    |        |        |        |            |
| ATOM | 2428 | O   | LEU | A | 18 | 67.227 | 27.192 | 55.297 | 1.00 35.63 |
| O    |      |     |     |   |    |        |        |        |            |
| ATOM | 2429 | CB  | LEU | A | 18 | 70.472 | 27.821 | 55.333 | 1.00 35.63 |
| C    |      |     |     |   |    |        |        |        |            |
| ATOM | 2430 | CG  | LEU | A | 18 | 71.048 | 28.490 | 56.579 | 1.00 35.63 |
| C    |      |     |     |   |    |        |        |        |            |
| ATOM | 2431 | CD1 | LEU | A | 18 | 71.821 | 27.496 | 57.414 | 1.00 35.63 |
| C    |      |     |     |   |    |        |        |        |            |
| ATOM | 2432 | CD2 | LEU | A | 18 | 71.928 | 29.662 | 56.193 | 1.00 35.63 |
| C    |      |     |     |   |    |        |        |        |            |
| ATOM | 2433 | N   | ARG | A | 19 | 68.108 | 27.203 | 57.367 | 1.00 32.71 |
| N    |      |     |     |   |    |        |        |        |            |
| ATOM | 2434 | CA  | ARG | A | 19 | 66.901 | 27.693 | 58.016 | 1.00 32.71 |
| C    |      |     |     |   |    |        |        |        |            |
| ATOM | 2435 | C   | ARG | A | 19 | 67.277 | 28.780 | 59.008 | 1.00 32.71 |
| C    |      |     |     |   |    |        |        |        |            |
| ATOM | 2436 | O   | ARG | A | 19 | 68.120 | 28.558 | 59.879 | 1.00 32.71 |
| O    |      |     |     |   |    |        |        |        |            |
| ATOM | 2437 | CB  | ARG | A | 19 | 66.143 | 26.564 | 58.733 | 1.00 32.71 |
| C    |      |     |     |   |    |        |        |        |            |
| ATOM | 2438 | CG  | ARG | A | 19 | 64.641 | 26.807 | 58.841 | 1.00 32.71 |
| C    |      |     |     |   |    |        |        |        |            |
| ATOM | 2439 | CD  | ARG | A | 19 | 63.896 | 25.600 | 59.393 | 1.00 32.71 |
| C    |      |     |     |   |    |        |        |        |            |
| ATOM | 2440 | NE  | ARG | A | 19 | 64.024 | 25.499 | 60.840 | 1.00 32.71 |
| N    |      |     |     |   |    |        |        |        |            |
| ATOM | 2441 | CZ  | ARG | A | 19 | 63.143 | 24.888 | 61.623 | 1.00 32.71 |
| C    |      |     |     |   |    |        |        |        |            |
| ATOM | 2442 | NH1 | ARG | A | 19 | 62.066 | 24.326 | 61.097 | 1.00 32.71 |
| N    |      |     |     |   |    |        |        |        |            |
| ATOM | 2443 | NH2 | ARG | A | 19 | 63.338 | 24.841 | 62.932 | 1.00 32.71 |

|      |      |     |     |   |    |        |        |        |      |       |
|------|------|-----|-----|---|----|--------|--------|--------|------|-------|
| N    |      |     |     |   |    |        |        |        |      |       |
| ATOM | 2444 | N   | LEU | A | 20 | 66.662 | 29.951 | 58.874 | 1.00 | 26.93 |
| N    |      |     |     |   |    |        |        |        |      |       |
| ATOM | 2445 | CA  | LEU | A | 20 | 66.765 | 30.972 | 59.904 | 1.00 | 26.93 |
| C    |      |     |     |   |    |        |        |        |      |       |
| ATOM | 2446 | C   | LEU | A | 20 | 65.492 | 31.012 | 60.726 | 1.00 | 26.93 |
| C    |      |     |     |   |    |        |        |        |      |       |
| ATOM | 2447 | O   | LEU | A | 20 | 64.411 | 30.651 | 60.261 | 1.00 | 26.93 |
| O    |      |     |     |   |    |        |        |        |      |       |
| ATOM | 2448 | CB  | LEU | A | 20 | 67.022 | 32.371 | 59.340 | 1.00 | 26.93 |
| C    |      |     |     |   |    |        |        |        |      |       |
| ATOM | 2449 | CG  | LEU | A | 20 | 67.845 | 32.633 | 58.100 | 1.00 | 26.93 |
| C    |      |     |     |   |    |        |        |        |      |       |
| ATOM | 2450 | CD1 | LEU | A | 20 | 67.632 | 34.094 | 57.700 | 1.00 | 26.93 |
| C    |      |     |     |   |    |        |        |        |      |       |
| ATOM | 2451 | CD2 | LEU | A | 20 | 69.297 | 32.334 | 58.371 | 1.00 | 26.93 |
| C    |      |     |     |   |    |        |        |        |      |       |
| ATOM | 2452 | N   | SER | A | 21 | 65.633 | 31.485 | 61.953 | 1.00 | 26.10 |
| N    |      |     |     |   |    |        |        |        |      |       |
| ATOM | 2453 | CA  | SER | A | 21 | 64.503 | 31.596 | 62.852 | 1.00 | 26.10 |
| C    |      |     |     |   |    |        |        |        |      |       |
| ATOM | 2454 | C   | SER | A | 21 | 64.598 | 32.917 | 63.591 | 1.00 | 26.10 |
| C    |      |     |     |   |    |        |        |        |      |       |
| ATOM | 2455 | O   | SER | A | 21 | 65.671 | 33.503 | 63.715 | 1.00 | 26.10 |
| O    |      |     |     |   |    |        |        |        |      |       |
| ATOM | 2456 | CB  | SER | A | 21 | 64.451 | 30.424 | 63.838 | 1.00 | 26.10 |
| C    |      |     |     |   |    |        |        |        |      |       |
| ATOM | 2457 | OG  | SER | A | 21 | 65.405 | 30.588 | 64.864 | 1.00 | 26.10 |
| O    |      |     |     |   |    |        |        |        |      |       |
| ATOM | 2458 | N   | CYS | A | 22 | 63.454 | 33.391 | 64.060 | 1.00 | 26.66 |
| N    |      |     |     |   |    |        |        |        |      |       |
| ATOM | 2459 | CA  | CYS | A | 22 | 63.355 | 34.663 | 64.757 | 1.00 | 26.66 |
| C    |      |     |     |   |    |        |        |        |      |       |
| ATOM | 2460 | C   | CYS | A | 22 | 62.310 | 34.498 | 65.848 | 1.00 | 26.66 |
| C    |      |     |     |   |    |        |        |        |      |       |
| ATOM | 2461 | O   | CYS | A | 22 | 61.151 | 34.209 | 65.553 | 1.00 | 26.66 |
| O    |      |     |     |   |    |        |        |        |      |       |
| ATOM | 2462 | CB  | CYS | A | 22 | 62.988 | 35.784 | 63.769 | 1.00 | 26.66 |
| C    |      |     |     |   |    |        |        |        |      |       |
| ATOM | 2463 | SG  | CYS | A | 22 | 62.337 | 37.323 | 64.438 | 1.00 | 26.66 |
| S    |      |     |     |   |    |        |        |        |      |       |
| ATOM | 2464 | N   | ALA | A | 23 | 62.719 | 34.651 | 67.101 | 1.00 | 30.10 |
| N    |      |     |     |   |    |        |        |        |      |       |
| ATOM | 2465 | CA  | ALA | A | 23 | 61.846 | 34.427 | 68.247 | 1.00 | 30.10 |
| C    |      |     |     |   |    |        |        |        |      |       |
| ATOM | 2466 | C   | ALA | A | 23 | 61.400 | 35.765 | 68.814 | 1.00 | 30.10 |
| C    |      |     |     |   |    |        |        |        |      |       |
| ATOM | 2467 | O   | ALA | A | 23 | 62.216 | 36.674 | 68.979 | 1.00 | 30.10 |
| O    |      |     |     |   |    |        |        |        |      |       |
| ATOM | 2468 | CB  | ALA | A | 23 | 62.553 | 33.601 | 69.322 | 1.00 | 30.10 |

|      |      |     |     |   |    |        |        |        |      |       |
|------|------|-----|-----|---|----|--------|--------|--------|------|-------|
| C    |      |     |     |   |    |        |        |        |      |       |
| ATOM | 2469 | N   | ALA | A | 24 | 60.111 | 35.885 | 69.108 | 1.00 | 34.23 |
| N    |      |     |     |   |    |        |        |        |      |       |
| ATOM | 2470 | CA  | ALA | A | 24 | 59.512 | 37.155 | 69.484 | 1.00 | 34.23 |
| C    |      |     |     |   |    |        |        |        |      |       |
| ATOM | 2471 | C   | ALA | A | 24 | 59.146 | 37.172 | 70.962 | 1.00 | 34.23 |
| C    |      |     |     |   |    |        |        |        |      |       |
| ATOM | 2472 | O   | ALA | A | 24 | 58.812 | 36.142 | 71.551 | 1.00 | 34.23 |
| O    |      |     |     |   |    |        |        |        |      |       |
| ATOM | 2473 | CB  | ALA | A | 24 | 58.266 | 37.442 | 68.647 | 1.00 | 34.23 |
| C    |      |     |     |   |    |        |        |        |      |       |
| ATOM | 2474 | N   | SER | A | 25 | 59.210 | 38.362 | 71.550 | 1.00 | 39.64 |
| N    |      |     |     |   |    |        |        |        |      |       |
| ATOM | 2475 | CA  | SER | A | 25 | 58.851 | 38.558 | 72.945 | 1.00 | 39.64 |
| C    |      |     |     |   |    |        |        |        |      |       |
| ATOM | 2476 | C   | SER | A | 25 | 58.331 | 39.973 | 73.122 | 1.00 | 39.64 |
| C    |      |     |     |   |    |        |        |        |      |       |
| ATOM | 2477 | O   | SER | A | 25 | 58.664 | 40.872 | 72.348 | 1.00 | 39.64 |
| O    |      |     |     |   |    |        |        |        |      |       |
| ATOM | 2478 | CB  | SER | A | 25 | 60.044 | 38.315 | 73.873 | 1.00 | 39.64 |
| C    |      |     |     |   |    |        |        |        |      |       |
| ATOM | 2479 | OG  | SER | A | 25 | 60.520 | 36.990 | 73.744 | 1.00 | 39.64 |
| O    |      |     |     |   |    |        |        |        |      |       |
| ATOM | 2480 | N   | GLY | A | 26 | 57.508 | 40.164 | 74.147 | 1.00 | 39.48 |
| N    |      |     |     |   |    |        |        |        |      |       |
| ATOM | 2481 | CA  | GLY | A | 26 | 57.023 | 41.487 | 74.467 | 1.00 | 39.48 |
| C    |      |     |     |   |    |        |        |        |      |       |
| ATOM | 2482 | C   | GLY | A | 26 | 55.867 | 41.986 | 73.634 | 1.00 | 39.48 |
| C    |      |     |     |   |    |        |        |        |      |       |
| ATOM | 2483 | O   | GLY | A | 26 | 55.541 | 43.174 | 73.713 | 1.00 | 39.48 |
| O    |      |     |     |   |    |        |        |        |      |       |
| ATOM | 2484 | N   | PHE | A | 27 | 55.248 | 41.132 | 72.824 | 1.00 | 33.26 |
| N    |      |     |     |   |    |        |        |        |      |       |
| ATOM | 2485 | CA  | PHE | A | 27 | 54.008 | 41.490 | 72.150 | 1.00 | 33.26 |
| C    |      |     |     |   |    |        |        |        |      |       |
| ATOM | 2486 | C   | PHE | A | 27 | 53.255 | 40.207 | 71.835 | 1.00 | 33.26 |
| C    |      |     |     |   |    |        |        |        |      |       |
| ATOM | 2487 | O   | PHE | A | 27 | 53.799 | 39.107 | 71.929 | 1.00 | 33.26 |
| O    |      |     |     |   |    |        |        |        |      |       |
| ATOM | 2488 | CB  | PHE | A | 27 | 54.254 | 42.342 | 70.894 | 1.00 | 33.26 |
| C    |      |     |     |   |    |        |        |        |      |       |
| ATOM | 2489 | CG  | PHE | A | 27 | 54.996 | 41.634 | 69.789 | 1.00 | 33.26 |
| C    |      |     |     |   |    |        |        |        |      |       |
| ATOM | 2490 | CD1 | PHE | A | 27 | 54.314 | 41.109 | 68.706 | 1.00 | 33.26 |
| C    |      |     |     |   |    |        |        |        |      |       |
| ATOM | 2491 | CD2 | PHE | A | 27 | 56.375 | 41.527 | 69.817 | 1.00 | 33.26 |
| C    |      |     |     |   |    |        |        |        |      |       |
| ATOM | 2492 | CE1 | PHE | A | 27 | 54.992 | 40.470 | 67.685 | 1.00 | 33.26 |
| C    |      |     |     |   |    |        |        |        |      |       |
| ATOM | 2493 | CE2 | PHE | A | 27 | 57.054 | 40.889 | 68.798 | 1.00 | 33.26 |

|      |      |     |     |   |    |        |        |        |      |       |
|------|------|-----|-----|---|----|--------|--------|--------|------|-------|
| C    |      |     |     |   |    |        |        |        |      |       |
| ATOM | 2494 | CZ  | PHE | A | 27 | 56.360 | 40.361 | 67.733 | 1.00 | 33.26 |
| C    |      |     |     |   |    |        |        |        |      |       |
| ATOM | 2495 | N   | THR | A | 28 | 51.981 | 40.362 | 71.496 | 1.00 | 30.28 |
| N    |      |     |     |   |    |        |        |        |      |       |
| ATOM | 2496 | CA  | THR | A | 28 | 51.126 | 39.218 | 71.196 | 1.00 | 30.28 |
| C    |      |     |     |   |    |        |        |        |      |       |
| ATOM | 2497 | C   | THR | A | 28 | 51.442 | 38.752 | 69.781 | 1.00 | 30.28 |
| C    |      |     |     |   |    |        |        |        |      |       |
| ATOM | 2498 | O   | THR | A | 28 | 50.960 | 39.322 | 68.802 | 1.00 | 30.28 |
| O    |      |     |     |   |    |        |        |        |      |       |
| ATOM | 2499 | CB  | THR | A | 28 | 49.657 | 39.586 | 71.357 | 1.00 | 30.28 |
| C    |      |     |     |   |    |        |        |        |      |       |
| ATOM | 2500 | OG1 | THR | A | 28 | 49.417 | 39.992 | 72.709 | 1.00 | 30.28 |
| O    |      |     |     |   |    |        |        |        |      |       |
| ATOM | 2501 | CG2 | THR | A | 28 | 48.782 | 38.389 | 71.051 | 1.00 | 30.28 |
| C    |      |     |     |   |    |        |        |        |      |       |
| ATOM | 2502 | N   | PHE | A | 29 | 52.252 | 37.696 | 69.688 | 1.00 | 24.75 |
| N    |      |     |     |   |    |        |        |        |      |       |
| ATOM | 2503 | CA  | PHE | A | 29 | 52.784 | 37.228 | 68.410 | 1.00 | 24.75 |
| C    |      |     |     |   |    |        |        |        |      |       |
| ATOM | 2504 | C   | PHE | A | 29 | 51.672 | 36.845 | 67.442 | 1.00 | 24.75 |
| C    |      |     |     |   |    |        |        |        |      |       |
| ATOM | 2505 | O   | PHE | A | 29 | 51.776 | 37.093 | 66.237 | 1.00 | 24.75 |
| O    |      |     |     |   |    |        |        |        |      |       |
| ATOM | 2506 | CB  | PHE | A | 29 | 53.718 | 36.045 | 68.679 | 1.00 | 24.75 |
| C    |      |     |     |   |    |        |        |        |      |       |
| ATOM | 2507 | CG  | PHE | A | 29 | 54.420 | 35.499 | 67.467 | 1.00 | 24.75 |
| C    |      |     |     |   |    |        |        |        |      |       |
| ATOM | 2508 | CD1 | PHE | A | 29 | 55.498 | 36.160 | 66.911 | 1.00 | 24.75 |
| C    |      |     |     |   |    |        |        |        |      |       |
| ATOM | 2509 | CD2 | PHE | A | 29 | 54.039 | 34.287 | 66.926 | 1.00 | 24.75 |
| C    |      |     |     |   |    |        |        |        |      |       |
| ATOM | 2510 | CE1 | PHE | A | 29 | 56.157 | 35.638 | 65.821 | 1.00 | 24.75 |
| C    |      |     |     |   |    |        |        |        |      |       |
| ATOM | 2511 | CE2 | PHE | A | 29 | 54.694 | 33.762 | 65.838 | 1.00 | 24.75 |
| C    |      |     |     |   |    |        |        |        |      |       |
| ATOM | 2512 | CZ  | PHE | A | 29 | 55.754 | 34.440 | 65.283 | 1.00 | 24.75 |
| C    |      |     |     |   |    |        |        |        |      |       |
| ATOM | 2513 | N   | SER | A | 30 | 50.588 | 36.260 | 67.955 | 1.00 | 25.64 |
| N    |      |     |     |   |    |        |        |        |      |       |
| ATOM | 2514 | CA  | SER | A | 30 | 49.535 | 35.727 | 67.101 | 1.00 | 25.64 |
| C    |      |     |     |   |    |        |        |        |      |       |
| ATOM | 2515 | C   | SER | A | 30 | 48.760 | 36.805 | 66.359 | 1.00 | 25.64 |
| C    |      |     |     |   |    |        |        |        |      |       |
| ATOM | 2516 | O   | SER | A | 30 | 48.175 | 36.513 | 65.315 | 1.00 | 25.64 |
| O    |      |     |     |   |    |        |        |        |      |       |
| ATOM | 2517 | CB  | SER | A | 30 | 48.563 | 34.887 | 67.929 | 1.00 | 25.64 |
| C    |      |     |     |   |    |        |        |        |      |       |
| ATOM | 2518 | OG  | SER | A | 30 | 49.255 | 33.905 | 68.672 | 1.00 | 25.64 |

|      |      |     |     |   |    |        |        |        |      |       |
|------|------|-----|-----|---|----|--------|--------|--------|------|-------|
| O    |      |     |     |   |    |        |        |        |      |       |
| ATOM | 2519 | N   | SER | A | 31 | 48.733 | 38.033 | 66.865 | 1.00 | 25.71 |
| N    |      |     |     |   |    |        |        |        |      |       |
| ATOM | 2520 | CA  | SER | A | 31 | 47.966 | 39.102 | 66.245 | 1.00 | 25.71 |
| C    |      |     |     |   |    |        |        |        |      |       |
| ATOM | 2521 | C   | SER | A | 31 | 48.809 | 39.980 | 65.328 | 1.00 | 25.71 |
| C    |      |     |     |   |    |        |        |        |      |       |
| ATOM | 2522 | O   | SER | A | 31 | 48.338 | 41.032 | 64.895 | 1.00 | 25.71 |
| O    |      |     |     |   |    |        |        |        |      |       |
| ATOM | 2523 | CB  | SER | A | 31 | 47.293 | 39.959 | 67.318 | 1.00 | 25.71 |
| C    |      |     |     |   |    |        |        |        |      |       |
| ATOM | 2524 | OG  | SER | A | 31 | 48.253 | 40.636 | 68.104 | 1.00 | 25.71 |
| O    |      |     |     |   |    |        |        |        |      |       |
| ATOM | 2525 | N   | TYR | A | 32 | 50.036 | 39.572 | 65.020 | 1.00 | 23.10 |
| N    |      |     |     |   |    |        |        |        |      |       |
| ATOM | 2526 | CA  | TYR | A | 32 | 50.923 | 40.328 | 64.148 | 1.00 | 23.10 |
| C    |      |     |     |   |    |        |        |        |      |       |
| ATOM | 2527 | C   | TYR | A | 32 | 51.300 | 39.492 | 62.933 | 1.00 | 23.10 |
| C    |      |     |     |   |    |        |        |        |      |       |
| ATOM | 2528 | O   | TYR | A | 32 | 51.536 | 38.289 | 63.047 | 1.00 | 23.10 |
| O    |      |     |     |   |    |        |        |        |      |       |
| ATOM | 2529 | CB  | TYR | A | 32 | 52.192 | 40.752 | 64.886 | 1.00 | 23.10 |
| C    |      |     |     |   |    |        |        |        |      |       |
| ATOM | 2530 | CG  | TYR | A | 32 | 52.033 | 41.982 | 65.739 | 1.00 | 23.10 |
| C    |      |     |     |   |    |        |        |        |      |       |
| ATOM | 2531 | CD1 | TYR | A | 32 | 52.671 | 43.161 | 65.409 | 1.00 | 23.10 |
| C    |      |     |     |   |    |        |        |        |      |       |
| ATOM | 2532 | CD2 | TYR | A | 32 | 51.244 | 41.964 | 66.877 | 1.00 | 23.10 |
| C    |      |     |     |   |    |        |        |        |      |       |
| ATOM | 2533 | CE1 | TYR | A | 32 | 52.534 | 44.285 | 66.183 | 1.00 | 23.10 |
| C    |      |     |     |   |    |        |        |        |      |       |
| ATOM | 2534 | CE2 | TYR | A | 32 | 51.101 | 43.087 | 67.657 | 1.00 | 23.10 |
| C    |      |     |     |   |    |        |        |        |      |       |
| ATOM | 2535 | CZ  | TYR | A | 32 | 51.746 | 44.242 | 67.303 | 1.00 | 23.10 |
| C    |      |     |     |   |    |        |        |        |      |       |
| ATOM | 2536 | OH  | TYR | A | 32 | 51.607 | 45.365 | 68.081 | 1.00 | 23.10 |
| O    |      |     |     |   |    |        |        |        |      |       |
| ATOM | 2537 | N   | ALA | A | 33 | 51.334 | 40.133 | 61.769 | 1.00 | 17.88 |
| N    |      |     |     |   |    |        |        |        |      |       |
| ATOM | 2538 | CA  | ALA | A | 33 | 51.905 | 39.527 | 60.577 | 1.00 | 17.88 |
| C    |      |     |     |   |    |        |        |        |      |       |
| ATOM | 2539 | C   | ALA | A | 33 | 53.418 | 39.704 | 60.609 | 1.00 | 17.88 |
| C    |      |     |     |   |    |        |        |        |      |       |
| ATOM | 2540 | O   | ALA | A | 33 | 53.919 | 40.729 | 61.071 | 1.00 | 17.88 |
| O    |      |     |     |   |    |        |        |        |      |       |
| ATOM | 2541 | CB  | ALA | A | 33 | 51.317 | 40.167 | 59.320 | 1.00 | 17.88 |
| C    |      |     |     |   |    |        |        |        |      |       |
| ATOM | 2542 | N   | MET | A | 34 | 54.150 | 38.700 | 60.139 | 1.00 | 17.58 |
| N    |      |     |     |   |    |        |        |        |      |       |
| ATOM | 2543 | CA  | MET | A | 34 | 55.601 | 38.692 | 60.293 | 1.00 | 17.58 |



|      |      |     |     |   |    |        |        |        |      |       |
|------|------|-----|-----|---|----|--------|--------|--------|------|-------|
| C    |      |     |     |   |    |        |        |        |      |       |
| ATOM | 2544 | C   | MET | A | 34 | 56.271 | 38.616 | 58.929 | 1.00 | 17.58 |
| C    |      |     |     |   |    |        |        |        |      |       |
| ATOM | 2545 | O   | MET | A | 34 | 55.790 | 37.928 | 58.033 | 1.00 | 17.58 |
| O    |      |     |     |   |    |        |        |        |      |       |
| ATOM | 2546 | CB  | MET | A | 34 | 56.057 | 37.522 | 61.172 | 1.00 | 17.58 |
| C    |      |     |     |   |    |        |        |        |      |       |
| ATOM | 2547 | CG  | MET | A | 34 | 55.427 | 37.486 | 62.563 | 1.00 | 17.58 |
| C    |      |     |     |   |    |        |        |        |      |       |
| ATOM | 2548 | SD  | MET | A | 34 | 55.813 | 38.909 | 63.596 | 1.00 | 17.58 |
| S    |      |     |     |   |    |        |        |        |      |       |
| ATOM | 2549 | CE  | MET | A | 34 | 57.580 | 38.724 | 63.773 | 1.00 | 17.58 |
| C    |      |     |     |   |    |        |        |        |      |       |
| ATOM | 2550 | N   | HIS | A | 35 | 57.390 | 39.316 | 58.767 | 1.00 | 16.19 |
| N    |      |     |     |   |    |        |        |        |      |       |
| ATOM | 2551 | CA  | HIS | A | 35 | 58.039 | 39.344 | 57.464 | 1.00 | 16.19 |
| C    |      |     |     |   |    |        |        |        |      |       |
| ATOM | 2552 | C   | HIS | A | 35 | 59.546 | 39.514 | 57.599 | 1.00 | 16.19 |
| C    |      |     |     |   |    |        |        |        |      |       |
| ATOM | 2553 | O   | HIS | A | 35 | 60.076 | 39.812 | 58.669 | 1.00 | 16.19 |
| O    |      |     |     |   |    |        |        |        |      |       |
| ATOM | 2554 | CB  | HIS | A | 35 | 57.403 | 40.404 | 56.560 | 1.00 | 16.19 |
| C    |      |     |     |   |    |        |        |        |      |       |
| ATOM | 2555 | CG  | HIS | A | 35 | 56.946 | 41.629 | 57.276 | 1.00 | 16.19 |
| C    |      |     |     |   |    |        |        |        |      |       |
| ATOM | 2556 | ND1 | HIS | A | 35 | 57.727 | 42.752 | 57.416 | 1.00 | 16.19 |
| N    |      |     |     |   |    |        |        |        |      |       |
| ATOM | 2557 | CD2 | HIS | A | 35 | 55.762 | 41.915 | 57.867 | 1.00 | 16.19 |
| C    |      |     |     |   |    |        |        |        |      |       |
| ATOM | 2558 | CE1 | HIS | A | 35 | 57.051 | 43.673 | 58.076 | 1.00 | 16.19 |
| C    |      |     |     |   |    |        |        |        |      |       |
| ATOM | 2559 | NE2 | HIS | A | 35 | 55.854 | 43.193 | 58.356 | 1.00 | 16.19 |
| N    |      |     |     |   |    |        |        |        |      |       |
| ATOM | 2560 | N   | TRP | A | 36 | 60.231 | 39.260 | 56.488 | 1.00 | 16.35 |
| N    |      |     |     |   |    |        |        |        |      |       |
| ATOM | 2561 | CA  | TRP | A | 36 | 61.687 | 39.304 | 56.425 | 1.00 | 16.35 |
| C    |      |     |     |   |    |        |        |        |      |       |
| ATOM | 2562 | C   | TRP | A | 36 | 62.127 | 40.339 | 55.401 | 1.00 | 16.35 |
| C    |      |     |     |   |    |        |        |        |      |       |
| ATOM | 2563 | O   | TRP | A | 36 | 61.522 | 40.466 | 54.337 | 1.00 | 16.35 |
| O    |      |     |     |   |    |        |        |        |      |       |
| ATOM | 2564 | CB  | TRP | A | 36 | 62.280 | 37.941 | 56.042 | 1.00 | 16.35 |
| C    |      |     |     |   |    |        |        |        |      |       |
| ATOM | 2565 | CG  | TRP | A | 36 | 62.169 | 36.875 | 57.085 | 1.00 | 16.35 |
| C    |      |     |     |   |    |        |        |        |      |       |
| ATOM | 2566 | CD1 | TRP | A | 36 | 61.168 | 35.965 | 57.215 | 1.00 | 16.35 |
| C    |      |     |     |   |    |        |        |        |      |       |
| ATOM | 2567 | CD2 | TRP | A | 36 | 63.111 | 36.586 | 58.121 | 1.00 | 16.35 |
| C    |      |     |     |   |    |        |        |        |      |       |
| ATOM | 2568 | NE1 | TRP | A | 36 | 61.418 | 35.134 | 58.274 | 1.00 | 16.35 |

|      |      |     |     |   |    |        |        |        |      |       |
|------|------|-----|-----|---|----|--------|--------|--------|------|-------|
| N    |      |     |     |   |    |        |        |        |      |       |
| ATOM | 2569 | CE2 | TRP | A | 36 | 62.605 | 35.496 | 58.849 | 1.00 | 16.35 |
| C    |      |     |     |   |    |        |        |        |      |       |
| ATOM | 2570 | CE3 | TRP | A | 36 | 64.329 | 37.148 | 58.509 | 1.00 | 16.35 |
| C    |      |     |     |   |    |        |        |        |      |       |
| ATOM | 2571 | CZ2 | TRP | A | 36 | 63.273 | 34.955 | 59.939 | 1.00 | 16.35 |
| C    |      |     |     |   |    |        |        |        |      |       |
| ATOM | 2572 | CZ3 | TRP | A | 36 | 64.988 | 36.609 | 59.592 | 1.00 | 16.35 |
| C    |      |     |     |   |    |        |        |        |      |       |
| ATOM | 2573 | CH2 | TRP | A | 36 | 64.459 | 35.525 | 60.295 | 1.00 | 16.35 |
| C    |      |     |     |   |    |        |        |        |      |       |
| ATOM | 2574 | N   | VAL | A | 37 | 63.184 | 41.071 | 55.732 | 1.00 | 15.71 |
| N    |      |     |     |   |    |        |        |        |      |       |
| ATOM | 2575 | CA  | VAL | A | 37 | 63.831 | 42.009 | 54.824 | 1.00 | 15.71 |
| C    |      |     |     |   |    |        |        |        |      |       |
| ATOM | 2576 | C   | VAL | A | 37 | 65.296 | 41.606 | 54.773 | 1.00 | 15.71 |
| C    |      |     |     |   |    |        |        |        |      |       |
| ATOM | 2577 | O   | VAL | A | 37 | 65.804 | 40.999 | 55.711 | 1.00 | 15.71 |
| O    |      |     |     |   |    |        |        |        |      |       |
| ATOM | 2578 | CB  | VAL | A | 37 | 63.649 | 43.470 | 55.300 | 1.00 | 15.71 |
| C    |      |     |     |   |    |        |        |        |      |       |
| ATOM | 2579 | CG1 | VAL | A | 37 | 64.468 | 44.446 | 54.466 | 1.00 | 15.71 |
| C    |      |     |     |   |    |        |        |        |      |       |
| ATOM | 2580 | CG2 | VAL | A | 37 | 62.185 | 43.852 | 55.264 | 1.00 | 15.71 |
| C    |      |     |     |   |    |        |        |        |      |       |
| ATOM | 2581 | N   | ARG | A | 38 | 65.969 | 41.878 | 53.662 | 1.00 | 17.46 |
| N    |      |     |     |   |    |        |        |        |      |       |
| ATOM | 2582 | CA  | ARG | A | 38 | 67.382 | 41.539 | 53.573 | 1.00 | 17.46 |
| C    |      |     |     |   |    |        |        |        |      |       |
| ATOM | 2583 | C   | ARG | A | 38 | 68.151 | 42.660 | 52.894 | 1.00 | 17.46 |
| C    |      |     |     |   |    |        |        |        |      |       |
| ATOM | 2584 | O   | ARG | A | 38 | 67.585 | 43.496 | 52.191 | 1.00 | 17.46 |
| O    |      |     |     |   |    |        |        |        |      |       |
| ATOM | 2585 | CB  | ARG | A | 38 | 67.609 | 40.219 | 52.826 | 1.00 | 17.46 |
| C    |      |     |     |   |    |        |        |        |      |       |
| ATOM | 2586 | CG  | ARG | A | 38 | 67.445 | 40.308 | 51.335 | 1.00 | 17.46 |
| C    |      |     |     |   |    |        |        |        |      |       |
| ATOM | 2587 | CD  | ARG | A | 38 | 67.762 | 38.981 | 50.674 | 1.00 | 17.46 |
| C    |      |     |     |   |    |        |        |        |      |       |
| ATOM | 2588 | NE  | ARG | A | 38 | 67.484 | 39.027 | 49.247 | 1.00 | 17.46 |
| N    |      |     |     |   |    |        |        |        |      |       |
| ATOM | 2589 | CZ  | ARG | A | 38 | 67.506 | 37.970 | 48.445 | 1.00 | 17.46 |
| C    |      |     |     |   |    |        |        |        |      |       |
| ATOM | 2590 | NH1 | ARG | A | 38 | 67.800 | 36.774 | 48.925 | 1.00 | 17.46 |
| N    |      |     |     |   |    |        |        |        |      |       |
| ATOM | 2591 | NH2 | ARG | A | 38 | 67.234 | 38.114 | 47.160 | 1.00 | 17.46 |
| N    |      |     |     |   |    |        |        |        |      |       |
| ATOM | 2592 | N   | GLN | A | 39 | 69.458 | 42.660 | 53.129 | 1.00 | 20.75 |
| N    |      |     |     |   |    |        |        |        |      |       |
| ATOM | 2593 | CA  | GLN | A | 39 | 70.374 | 43.627 | 52.537 | 1.00 | 20.75 |

|      |      |     |     |   |    |        |        |        |      |       |
|------|------|-----|-----|---|----|--------|--------|--------|------|-------|
| C    |      |     |     |   |    |        |        |        |      |       |
| ATOM | 2594 | C   | GLN | A | 39 | 71.662 | 42.911 | 52.169 | 1.00 | 20.75 |
| C    |      |     |     |   |    |        |        |        |      |       |
| ATOM | 2595 | O   | GLN | A | 39 | 72.343 | 42.379 | 53.046 | 1.00 | 20.75 |
| O    |      |     |     |   |    |        |        |        |      |       |
| ATOM | 2596 | CB  | GLN | A | 39 | 70.661 | 44.772 | 53.509 | 1.00 | 20.75 |
| C    |      |     |     |   |    |        |        |        |      |       |
| ATOM | 2597 | CG  | GLN | A | 39 | 71.638 | 45.790 | 52.986 | 1.00 | 20.75 |
| C    |      |     |     |   |    |        |        |        |      |       |
| ATOM | 2598 | CD  | GLN | A | 39 | 71.596 | 47.067 | 53.779 | 1.00 | 20.75 |
| C    |      |     |     |   |    |        |        |        |      |       |
| ATOM | 2599 | OE1 | GLN | A | 39 | 71.422 | 47.048 | 54.993 | 1.00 | 20.75 |
| O    |      |     |     |   |    |        |        |        |      |       |
| ATOM | 2600 | NE2 | GLN | A | 39 | 71.747 | 48.187 | 53.097 | 1.00 | 20.75 |
| N    |      |     |     |   |    |        |        |        |      |       |
| ATOM | 2601 | N   | LEU | A | 40 | 71.978 | 42.881 | 50.910 | 1.00 | 24.03 |
| N    |      |     |     |   |    |        |        |        |      |       |
| ATOM | 2602 | CA  | LEU | A | 40 | 73.227 | 42.283 | 50.463 | 1.00 | 24.03 |
| C    |      |     |     |   |    |        |        |        |      |       |
| ATOM | 2603 | C   | LEU | A | 40 | 74.357 | 43.308 | 50.509 | 1.00 | 24.03 |
| C    |      |     |     |   |    |        |        |        |      |       |
| ATOM | 2604 | O   | LEU | A | 40 | 74.111 | 44.511 | 50.411 | 1.00 | 24.03 |
| O    |      |     |     |   |    |        |        |        |      |       |
| ATOM | 2605 | CB  | LEU | A | 40 | 73.077 | 41.746 | 49.045 | 1.00 | 24.03 |
| C    |      |     |     |   |    |        |        |        |      |       |
| ATOM | 2606 | N   | PRO | A | 41 | 75.605 | 42.870 | 50.672 | 1.00 | 26.76 |
| N    |      |     |     |   |    |        |        |        |      |       |
| ATOM | 2607 | CA  | PRO | A | 41 | 76.723 | 43.824 | 50.673 | 1.00 | 26.76 |
| C    |      |     |     |   |    |        |        |        |      |       |
| ATOM | 2608 | C   | PRO | A | 41 | 76.795 | 44.589 | 49.359 | 1.00 | 26.76 |
| C    |      |     |     |   |    |        |        |        |      |       |
| ATOM | 2609 | O   | PRO | A | 41 | 76.754 | 44.004 | 48.276 | 1.00 | 26.76 |
| O    |      |     |     |   |    |        |        |        |      |       |
| ATOM | 2610 | CB  | PRO | A | 41 | 77.955 | 42.934 | 50.877 | 1.00 | 26.76 |
| C    |      |     |     |   |    |        |        |        |      |       |
| ATOM | 2611 | CG  | PRO | A | 41 | 77.439 | 41.663 | 51.430 | 1.00 | 26.76 |
| C    |      |     |     |   |    |        |        |        |      |       |
| ATOM | 2612 | CD  | PRO | A | 41 | 76.054 | 41.487 | 50.898 | 1.00 | 26.76 |
| C    |      |     |     |   |    |        |        |        |      |       |
| ATOM | 2613 | N   | GLY | A | 42 | 76.894 | 45.909 | 49.463 | 1.00 | 28.41 |
| N    |      |     |     |   |    |        |        |        |      |       |
| ATOM | 2614 | CA  | GLY | A | 42 | 76.944 | 46.735 | 48.276 | 1.00 | 28.41 |
| C    |      |     |     |   |    |        |        |        |      |       |
| ATOM | 2615 | C   | GLY | A | 42 | 75.630 | 46.909 | 47.555 | 1.00 | 28.41 |
| C    |      |     |     |   |    |        |        |        |      |       |
| ATOM | 2616 | O   | GLY | A | 42 | 75.626 | 47.348 | 46.403 | 1.00 | 28.41 |
| O    |      |     |     |   |    |        |        |        |      |       |
| ATOM | 2617 | N   | LYS | A | 43 | 74.511 | 46.568 | 48.186 | 1.00 | 26.43 |
| N    |      |     |     |   |    |        |        |        |      |       |
| ATOM | 2618 | CA  | LYS | A | 43 | 73.200 | 46.750 | 47.586 | 1.00 | 26.43 |

|      |      |     |     |   |    |        |        |        |      |       |
|------|------|-----|-----|---|----|--------|--------|--------|------|-------|
| C    |      |     |     |   |    |        |        |        |      |       |
| ATOM | 2619 | C   | LYS | A | 43 | 72.260 | 47.342 | 48.623 | 1.00 | 26.43 |
| C    |      |     |     |   |    |        |        |        |      |       |
| ATOM | 2620 | O   | LYS | A | 43 | 72.561 | 47.380 | 49.816 | 1.00 | 26.43 |
| O    |      |     |     |   |    |        |        |        |      |       |
| ATOM | 2621 | CB  | LYS | A | 43 | 72.634 | 45.436 | 47.042 | 1.00 | 26.43 |
| C    |      |     |     |   |    |        |        |        |      |       |
| ATOM | 2622 | CG  | LYS | A | 43 | 73.523 | 44.737 | 46.041 | 1.00 | 26.43 |
| C    |      |     |     |   |    |        |        |        |      |       |
| ATOM | 2623 | CD  | LYS | A | 43 | 72.711 | 43.843 | 45.130 | 1.00 | 26.43 |
| C    |      |     |     |   |    |        |        |        |      |       |
| ATOM | 2624 | CE  | LYS | A | 43 | 73.570 | 43.269 | 44.017 | 1.00 | 26.43 |
| C    |      |     |     |   |    |        |        |        |      |       |
| ATOM | 2625 | NZ  | LYS | A | 43 | 74.835 | 44.034 | 43.832 | 1.00 | 26.43 |
| N    |      |     |     |   |    |        |        |        |      |       |
| ATOM | 2626 | N   | GLY | A | 44 | 71.111 | 47.811 | 48.152 | 1.00 | 20.13 |
| N    |      |     |     |   |    |        |        |        |      |       |
| ATOM | 2627 | CA  | GLY | A | 44 | 70.102 | 48.356 | 49.031 | 1.00 | 20.13 |
| C    |      |     |     |   |    |        |        |        |      |       |
| ATOM | 2628 | C   | GLY | A | 44 | 69.233 | 47.282 | 49.662 | 1.00 | 20.13 |
| C    |      |     |     |   |    |        |        |        |      |       |
| ATOM | 2629 | O   | GLY | A | 44 | 69.417 | 46.084 | 49.465 | 1.00 | 20.13 |
| O    |      |     |     |   |    |        |        |        |      |       |
| ATOM | 2630 | N   | LEU | A | 45 | 68.259 | 47.743 | 50.438 | 1.00 | 16.62 |
| N    |      |     |     |   |    |        |        |        |      |       |
| ATOM | 2631 | CA  | LEU | A | 45 | 67.336 | 46.856 | 51.135 | 1.00 | 16.62 |
| C    |      |     |     |   |    |        |        |        |      |       |
| ATOM | 2632 | C   | LEU | A | 45 | 66.403 | 46.149 | 50.158 | 1.00 | 16.62 |
| C    |      |     |     |   |    |        |        |        |      |       |
| ATOM | 2633 | O   | LEU | A | 45 | 65.990 | 46.709 | 49.143 | 1.00 | 16.62 |
| O    |      |     |     |   |    |        |        |        |      |       |
| ATOM | 2634 | CB  | LEU | A | 45 | 66.516 | 47.651 | 52.147 | 1.00 | 16.62 |
| C    |      |     |     |   |    |        |        |        |      |       |
| ATOM | 2635 | CG  | LEU | A | 45 | 67.302 | 48.358 | 53.246 | 1.00 | 16.62 |
| C    |      |     |     |   |    |        |        |        |      |       |
| ATOM | 2636 | CD1 | LEU | A | 45 | 66.528 | 49.555 | 53.761 | 1.00 | 16.62 |
| C    |      |     |     |   |    |        |        |        |      |       |
| ATOM | 2637 | CD2 | LEU | A | 45 | 67.597 | 47.390 | 54.373 | 1.00 | 16.62 |
| C    |      |     |     |   |    |        |        |        |      |       |
| ATOM | 2638 | N   | GLU | A | 46 | 66.064 | 44.902 | 50.479 | 1.00 | 18.11 |
| N    |      |     |     |   |    |        |        |        |      |       |
| ATOM | 2639 | CA  | GLU | A | 46 | 65.142 | 44.116 | 49.669 | 1.00 | 18.11 |
| C    |      |     |     |   |    |        |        |        |      |       |
| ATOM | 2640 | C   | GLU | A | 46 | 64.164 | 43.378 | 50.571 | 1.00 | 18.11 |
| C    |      |     |     |   |    |        |        |        |      |       |
| ATOM | 2641 | O   | GLU | A | 46 | 64.566 | 42.785 | 51.572 | 1.00 | 18.11 |
| O    |      |     |     |   |    |        |        |        |      |       |
| ATOM | 2642 | CB  | GLU | A | 46 | 65.893 | 43.112 | 48.788 | 1.00 | 18.11 |
| C    |      |     |     |   |    |        |        |        |      |       |
| ATOM | 2643 | CG  | GLU | A | 46 | 66.669 | 43.740 | 47.653 | 1.00 | 18.11 |

|      |      |     |     |   |    |        |        |        |      |       |
|------|------|-----|-----|---|----|--------|--------|--------|------|-------|
| C    |      |     |     |   |    |        |        |        |      |       |
| ATOM | 2644 | CD  | GLU | A | 46 | 67.177 | 42.710 | 46.671 | 1.00 | 18.11 |
| C    |      |     |     |   |    |        |        |        |      |       |
| ATOM | 2645 | OE1 | GLU | A | 46 | 67.573 | 41.614 | 47.114 | 1.00 | 18.11 |
| O    |      |     |     |   |    |        |        |        |      |       |
| ATOM | 2646 | OE2 | GLU | A | 46 | 67.171 | 42.995 | 45.460 | 1.00 | 18.11 |
| O    |      |     |     |   |    |        |        |        |      |       |
| ATOM | 2647 | N   | TRP | A | 47 | 62.888 | 43.409 | 50.206 | 1.00 | 14.93 |
| N    |      |     |     |   |    |        |        |        |      |       |
| ATOM | 2648 | CA  | TRP | A | 47 | 61.829 | 42.717 | 50.931 | 1.00 | 14.93 |
| C    |      |     |     |   |    |        |        |        |      |       |
| ATOM | 2649 | C   | TRP | A | 47 | 61.739 | 41.272 | 50.458 | 1.00 | 14.93 |
| C    |      |     |     |   |    |        |        |        |      |       |
| ATOM | 2650 | O   | TRP | A | 47 | 61.842 | 40.993 | 49.264 | 1.00 | 14.93 |
| O    |      |     |     |   |    |        |        |        |      |       |
| ATOM | 2651 | CB  | TRP | A | 47 | 60.512 | 43.460 | 50.700 | 1.00 | 14.93 |
| C    |      |     |     |   |    |        |        |        |      |       |
| ATOM | 2652 | CG  | TRP | A | 47 | 59.284 | 43.037 | 51.458 | 1.00 | 14.93 |
| C    |      |     |     |   |    |        |        |        |      |       |
| ATOM | 2653 | CD1 | TRP | A | 47 | 58.810 | 43.581 | 52.614 | 1.00 | 14.93 |
| C    |      |     |     |   |    |        |        |        |      |       |
| ATOM | 2654 | CD2 | TRP | A | 47 | 58.317 | 42.067 | 51.050 | 1.00 | 14.93 |
| C    |      |     |     |   |    |        |        |        |      |       |
| ATOM | 2655 | NE1 | TRP | A | 47 | 57.631 | 42.982 | 52.970 | 1.00 | 14.93 |
| N    |      |     |     |   |    |        |        |        |      |       |
| ATOM | 2656 | CE2 | TRP | A | 47 | 57.304 | 42.050 | 52.025 | 1.00 | 14.93 |
| C    |      |     |     |   |    |        |        |        |      |       |
| ATOM | 2657 | CE3 | TRP | A | 47 | 58.220 | 41.195 | 49.968 | 1.00 | 14.93 |
| C    |      |     |     |   |    |        |        |        |      |       |
| ATOM | 2658 | CZ2 | TRP | A | 47 | 56.209 | 41.198 | 51.945 | 1.00 | 14.93 |
| C    |      |     |     |   |    |        |        |        |      |       |
| ATOM | 2659 | CZ3 | TRP | A | 47 | 57.133 | 40.350 | 49.892 | 1.00 | 14.93 |
| C    |      |     |     |   |    |        |        |        |      |       |
| ATOM | 2660 | CH2 | TRP | A | 47 | 56.143 | 40.358 | 50.875 | 1.00 | 14.93 |
| C    |      |     |     |   |    |        |        |        |      |       |
| ATOM | 2661 | N   | VAL | A | 48 | 61.548 | 40.350 | 51.400 | 1.00 | 15.82 |
| N    |      |     |     |   |    |        |        |        |      |       |
| ATOM | 2662 | CA  | VAL | A | 48 | 61.666 | 38.927 | 51.098 | 1.00 | 15.82 |
| C    |      |     |     |   |    |        |        |        |      |       |
| ATOM | 2663 | C   | VAL | A | 48 | 60.298 | 38.249 | 51.070 | 1.00 | 15.82 |
| C    |      |     |     |   |    |        |        |        |      |       |
| ATOM | 2664 | O   | VAL | A | 48 | 59.830 | 37.829 | 50.009 | 1.00 | 15.82 |
| O    |      |     |     |   |    |        |        |        |      |       |
| ATOM | 2665 | CB  | VAL | A | 48 | 62.616 | 38.256 | 52.111 | 1.00 | 15.82 |
| C    |      |     |     |   |    |        |        |        |      |       |
| ATOM | 2666 | CG1 | VAL | A | 48 | 62.717 | 36.778 | 51.894 | 1.00 | 15.82 |
| C    |      |     |     |   |    |        |        |        |      |       |
| ATOM | 2667 | CG2 | VAL | A | 48 | 64.002 | 38.869 | 52.007 | 1.00 | 15.82 |
| C    |      |     |     |   |    |        |        |        |      |       |
| ATOM | 2668 | N   | ALA | A | 49 | 59.625 | 38.179 | 52.214 | 1.00 | 15.41 |

|      |      |     |     |   |    |        |        |        |      |       |
|------|------|-----|-----|---|----|--------|--------|--------|------|-------|
| N    |      |     |     |   |    |        |        |        |      |       |
| ATOM | 2669 | CA  | ALA | A | 49 | 58.382 | 37.425 | 52.299 | 1.00 | 15.41 |
| C    |      |     |     |   |    |        |        |        |      |       |
| ATOM | 2670 | C   | ALA | A | 49 | 57.612 | 37.849 | 53.539 | 1.00 | 15.41 |
| C    |      |     |     |   |    |        |        |        |      |       |
| ATOM | 2671 | O   | ALA | A | 49 | 58.183 | 38.387 | 54.490 | 1.00 | 15.41 |
| O    |      |     |     |   |    |        |        |        |      |       |
| ATOM | 2672 | CB  | ALA | A | 49 | 58.645 | 35.919 | 52.337 | 1.00 | 15.41 |
| C    |      |     |     |   |    |        |        |        |      |       |
| ATOM | 2673 | N   | VAL | A | 50 | 56.304 | 37.569 | 53.519 | 1.00 | 16.30 |
| N    |      |     |     |   |    |        |        |        |      |       |
| ATOM | 2674 | CA  | VAL | A | 50 | 55.409 | 37.873 | 54.630 | 1.00 | 16.30 |
| C    |      |     |     |   |    |        |        |        |      |       |
| ATOM | 2675 | C   | VAL | A | 50 | 54.476 | 36.693 | 54.879 | 1.00 | 16.30 |
| C    |      |     |     |   |    |        |        |        |      |       |
| ATOM | 2676 | O   | VAL | A | 50 | 54.025 | 36.013 | 53.946 | 1.00 | 16.30 |
| O    |      |     |     |   |    |        |        |        |      |       |
| ATOM | 2677 | CB  | VAL | A | 50 | 54.598 | 39.167 | 54.386 | 1.00 | 16.30 |
| C    |      |     |     |   |    |        |        |        |      |       |
| ATOM | 2678 | CG1 | VAL | A | 50 | 53.648 | 39.002 | 53.208 | 1.00 | 16.30 |
| C    |      |     |     |   |    |        |        |        |      |       |
| ATOM | 2679 | CG2 | VAL | A | 50 | 53.838 | 39.573 | 55.643 | 1.00 | 16.30 |
| C    |      |     |     |   |    |        |        |        |      |       |
| ATOM | 2680 | N   | ILE | A | 51 | 54.207 | 36.450 | 56.161 | 1.00 | 17.81 |
| N    |      |     |     |   |    |        |        |        |      |       |
| ATOM | 2681 | CA  | ILE | A | 51 | 53.243 | 35.453 | 56.615 | 1.00 | 17.81 |
| C    |      |     |     |   |    |        |        |        |      |       |
| ATOM | 2682 | C   | ILE | A | 51 | 52.194 | 36.105 | 57.517 | 1.00 | 17.81 |
| C    |      |     |     |   |    |        |        |        |      |       |
| ATOM | 2683 | O   | ILE | A | 51 | 52.533 | 36.806 | 58.485 | 1.00 | 17.81 |
| O    |      |     |     |   |    |        |        |        |      |       |
| ATOM | 2684 | CB  | ILE | A | 51 | 53.947 | 34.271 | 57.306 | 1.00 | 17.81 |
| C    |      |     |     |   |    |        |        |        |      |       |
| ATOM | 2685 | CG1 | ILE | A | 51 | 52.946 | 33.157 | 57.609 | 1.00 | 17.81 |
| C    |      |     |     |   |    |        |        |        |      |       |
| ATOM | 2686 | CG2 | ILE | A | 51 | 54.699 | 34.699 | 58.561 | 1.00 | 17.81 |
| C    |      |     |     |   |    |        |        |        |      |       |
| ATOM | 2687 | CD1 | ILE | A | 51 | 53.584 | 31.818 | 57.800 | 1.00 | 17.81 |
| C    |      |     |     |   |    |        |        |        |      |       |
| ATOM | 2688 | N   | PRO | A | 52 | 50.907 | 35.931 | 57.191 | 1.00 | 20.70 |
| N    |      |     |     |   |    |        |        |        |      |       |
| ATOM | 2689 | CA  | PRO | A | 52 | 49.813 | 36.430 | 58.039 | 1.00 | 20.70 |
| C    |      |     |     |   |    |        |        |        |      |       |
| ATOM | 2690 | C   | PRO | A | 52 | 49.670 | 35.759 | 59.400 | 1.00 | 20.70 |
| C    |      |     |     |   |    |        |        |        |      |       |
| ATOM | 2691 | O   | PRO | A | 52 | 50.491 | 34.928 | 59.792 | 1.00 | 20.70 |
| O    |      |     |     |   |    |        |        |        |      |       |
| ATOM | 2692 | CB  | PRO | A | 52 | 48.580 | 36.157 | 57.171 | 1.00 | 20.70 |
| C    |      |     |     |   |    |        |        |        |      |       |
| ATOM | 2693 | CG  | PRO | A | 52 | 49.073 | 36.332 | 55.792 | 1.00 | 20.70 |

|      |      |     |      |   |    |        |        |        |      |       |
|------|------|-----|------|---|----|--------|--------|--------|------|-------|
| C    |      |     |      |   |    |        |        |        |      |       |
| ATOM | 2694 | CD  | PRO  | A | 52 | 50.476 | 35.769 | 55.795 | 1.00 | 20.70 |
| C    |      |     |      |   |    |        |        |        |      |       |
| ATOM | 2695 | N   | PHE  | A | 53 | 48.605 | 36.133 | 60.122 | 1.00 | 22.17 |
| N    |      |     |      |   |    |        |        |        |      |       |
| ATOM | 2696 | CA  | PHE  | A | 53 | 48.444 | 35.763 | 61.529 | 1.00 | 22.17 |
| C    |      |     |      |   |    |        |        |        |      |       |
| ATOM | 2697 | C   | PHE  | A | 53 | 48.384 | 34.254 | 61.724 | 1.00 | 22.17 |
| C    |      |     |      |   |    |        |        |        |      |       |
| ATOM | 2698 | O   | PHE  | A | 53 | 49.020 | 33.712 | 62.632 | 1.00 | 22.17 |
| O    |      |     |      |   |    |        |        |        |      |       |
| ATOM | 2699 | CB  | PHE  | A | 53 | 47.177 | 36.406 | 62.094 | 1.00 | 22.17 |
| C    |      |     |      |   |    |        |        |        |      |       |
| ATOM | 2700 | CG  | PHE  | A | 53 | 46.994 | 37.828 | 61.691 | 1.00 | 22.17 |
| C    |      |     |      |   |    |        |        |        |      |       |
| ATOM | 2701 | CD1 | PHE  | A | 53 | 47.918 | 38.782 | 62.053 | 1.00 | 22.17 |
| C    |      |     |      |   |    |        |        |        |      |       |
| ATOM | 2702 | CD2 | PHE  | A | 53 | 45.900 | 38.214 | 60.948 | 1.00 | 22.17 |
| C    |      |     |      |   |    |        |        |        |      |       |
| ATOM | 2703 | CE1 | PHE  | A | 53 | 47.760 | 40.089 | 61.682 | 1.00 | 22.17 |
| C    |      |     |      |   |    |        |        |        |      |       |
| ATOM | 2704 | CE2 | PHE  | A | 53 | 45.738 | 39.524 | 60.577 | 1.00 | 22.17 |
| C    |      |     |      |   |    |        |        |        |      |       |
| ATOM | 2705 | CZ  | PHE  | A | 53 | 46.667 | 40.462 | 60.945 | 1.00 | 22.17 |
| C    |      |     |      |   |    |        |        |        |      |       |
| ATOM | 2706 | N   | ASP  | A | 54 | 47.603 | 33.563 | 60.903 | 1.00 | 30.50 |
| N    |      |     |      |   |    |        |        |        |      |       |
| ATOM | 2707 | CA  | ASP  | A | 54 | 47.511 | 32.116 | 61.019 | 1.00 | 30.50 |
| C    |      |     |      |   |    |        |        |        |      |       |
| ATOM | 2708 | C   | ASP  | A | 54 | 48.454 | 31.395 | 60.070 | 1.00 | 30.50 |
| C    |      |     |      |   |    |        |        |        |      |       |
| ATOM | 2709 | O   | ASP  | A | 54 | 48.843 | 30.257 | 60.346 | 1.00 | 30.50 |
| O    |      |     |      |   |    |        |        |        |      |       |
| ATOM | 2710 | CB  | ASP  | A | 54 | 46.071 | 31.654 | 60.777 | 1.00 | 30.50 |
| C    |      |     |      |   |    |        |        |        |      |       |
| ATOM | 2711 | CG  | ASP  | A | 54 | 45.601 | 31.929 | 59.370 | 1.00 | 30.50 |
| C    |      |     |      |   |    |        |        |        |      |       |
| ATOM | 2712 | OD1 | ASP  | A | 54 | 44.773 | 31.151 | 58.859 | 1.00 | 30.50 |
| O    |      |     |      |   |    |        |        |        |      |       |
| ATOM | 2713 | OD2 | ASP  | A | 54 | 46.052 | 32.926 | 58.773 | 1.00 | 30.50 |
| O    |      |     |      |   |    |        |        |        |      |       |
| ATOM | 2714 | N   | GLY  | A | 55 | 48.839 | 32.030 | 58.970 | 1.00 | 31.94 |
| N    |      |     |      |   |    |        |        |        |      |       |
| ATOM | 2715 | CA  | GLY  | A | 55 | 49.796 | 31.445 | 58.057 | 1.00 | 31.94 |
| C    |      |     |      |   |    |        |        |        |      |       |
| ATOM | 2716 | C   | GLY  | A | 55 | 49.211 | 30.606 | 56.948 | 1.00 | 31.94 |
| C    |      |     |      |   |    |        |        |        |      |       |
| ATOM | 2717 | O   | GLY  | A | 55 | 49.948 | 29.838 | 56.324 | 1.00 | 31.94 |
| O    |      |     |      |   |    |        |        |        |      |       |
| ATOM | 2718 | N   | AARG | A | 56 | 47.910 | 30.723 | 56.680 | 0.50 | 42.12 |

|      |      |         |      |    |        |        |        |        |       |       |
|------|------|---------|------|----|--------|--------|--------|--------|-------|-------|
| N    |      |         |      |    |        |        |        |        |       |       |
| ATOM | 2719 | CA      | AARG | A  | 56     | 47.298 | 29.923 | 55.625 | 0.50  | 42.12 |
| C    |      |         |      |    |        |        |        |        |       |       |
| ATOM | 2720 | C       | AARG | A  | 56     | 47.715 | 30.411 | 54.243 | 0.50  | 42.12 |
| C    |      |         |      |    |        |        |        |        |       |       |
| ATOM | 2721 | O       | AARG | A  | 56     | 47.947 | 29.603 | 53.339 | 0.50  | 42.12 |
| O    |      |         |      |    |        |        |        |        |       |       |
| ATOM | 2722 | CB      | AARG | A  | 56     | 45.779 | 29.946 | 55.776 | 0.50  | 42.12 |
| C    |      |         |      |    |        |        |        |        |       |       |
| ATOM | 2723 | CG      | AARG | A  | 56     | 45.056 | 28.947 | 54.902 | 0.50  | 42.12 |
| C    |      |         |      |    |        |        |        |        |       |       |
| ATOM | 2724 | CD      | AARG | A  | 56     | 43.561 | 28.967 | 55.166 | 0.50  | 42.12 |
| C    |      |         |      |    |        |        |        |        |       |       |
| ATOM | 2725 | NE      | AARG | A  | 56     | 42.803 | 28.482 | 54.018 | 0.50  | 42.12 |
| N    |      |         |      |    |        |        |        |        |       |       |
| ATOM | 2726 | CZ      | AARG | A  | 56     | 41.477 | 28.496 | 53.938 | 0.50  | 42.12 |
| C    |      |         |      |    |        |        |        |        |       |       |
| ATOM | 2727 | NH1AARG | A    | 56 | 40.755 | 28.971 | 54.943 | 0.50   | 42.12 |       |
| N    |      |         |      |    |        |        |        |        |       |       |
| ATOM | 2728 | NH2AARG | A    | 56 | 40.874 | 28.035 | 52.853 | 0.50   | 42.12 |       |
| N    |      |         |      |    |        |        |        |        |       |       |
| ATOM | 2729 | N       | BARG | A  | 56     | 48.010 | 30.723 | 56.680 | 0.50  | 42.12 |
| N    |      |         |      |    |        |        |        |        |       |       |
| ATOM | 2730 | CA      | BARG | A  | 56     | 47.398 | 29.923 | 55.625 | 0.50  | 42.12 |
| C    |      |         |      |    |        |        |        |        |       |       |
| ATOM | 2731 | C       | BARG | A  | 56     | 47.815 | 30.411 | 54.243 | 0.50  | 42.12 |
| C    |      |         |      |    |        |        |        |        |       |       |
| ATOM | 2732 | O       | BARG | A  | 56     | 48.047 | 29.603 | 53.339 | 0.50  | 42.12 |
| O    |      |         |      |    |        |        |        |        |       |       |
| ATOM | 2733 | CB      | BARG | A  | 56     | 45.879 | 29.946 | 55.776 | 0.50  | 42.12 |
| C    |      |         |      |    |        |        |        |        |       |       |
| ATOM | 2734 | CG      | BARG | A  | 56     | 45.376 | 29.330 | 57.061 | 0.50  | 42.12 |
| C    |      |         |      |    |        |        |        |        |       |       |
| ATOM | 2735 | CD      | BARG | A  | 56     | 45.660 | 27.839 | 57.103 | 0.50  | 42.12 |
| C    |      |         |      |    |        |        |        |        |       |       |
| ATOM | 2736 | NE      | BARG | A  | 56     | 45.159 | 27.228 | 58.329 | 0.50  | 42.12 |
| N    |      |         |      |    |        |        |        |        |       |       |
| ATOM | 2737 | CZ      | BARG | A  | 56     | 45.466 | 25.999 | 58.732 | 0.50  | 42.12 |
| C    |      |         |      |    |        |        |        |        |       |       |
| ATOM | 2738 | NH1BARG | A    | 56 | 46.275 | 25.243 | 58.003 | 0.50   | 42.12 |       |
| N    |      |         |      |    |        |        |        |        |       |       |
| ATOM | 2739 | NH2BARG | A    | 56 | 44.963 | 25.528 | 59.862 | 0.50   | 42.12 |       |
| N    |      |         |      |    |        |        |        |        |       |       |
| ATOM | 2740 | N       | ASN  | A  | 57     | 47.806 | 31.722 | 54.057 | 1.00  | 33.59 |
| N    |      |         |      |    |        |        |        |        |       |       |
| ATOM | 2741 | CA      | ASN  | A  | 57     | 48.312 | 32.322 | 52.834 | 1.00  | 33.59 |
| C    |      |         |      |    |        |        |        |        |       |       |
| ATOM | 2742 | C       | ASN  | A  | 57     | 49.702 | 32.885 | 53.106 | 1.00  | 33.59 |
| C    |      |         |      |    |        |        |        |        |       |       |
| ATOM | 2743 | O       | ASN  | A  | 57     | 50.013 | 33.266 | 54.233 | 1.00  | 33.59 |



|      |      |     |     |   |    |        |        |        |      |       |
|------|------|-----|-----|---|----|--------|--------|--------|------|-------|
| O    |      |     |     |   |    |        |        |        |      |       |
| ATOM | 2744 | CB  | ASN | A | 57 | 47.379 | 33.430 | 52.335 | 1.00 | 33.59 |
| C    |      |     |     |   |    |        |        |        |      |       |
| ATOM | 2745 | CG  | ASN | A | 57 | 45.970 | 32.932 | 52.073 | 1.00 | 33.59 |
| C    |      |     |     |   |    |        |        |        |      |       |
| ATOM | 2746 | OD1 | ASN | A | 57 | 45.694 | 32.346 | 51.033 | 1.00 | 33.59 |
| O    |      |     |     |   |    |        |        |        |      |       |
| ATOM | 2747 | ND2 | ASN | A | 57 | 45.077 | 33.161 | 53.022 | 1.00 | 33.59 |
| N    |      |     |     |   |    |        |        |        |      |       |
| ATOM | 2748 | N   | LYS | A | 58 | 50.548 | 32.901 | 52.080 | 1.00 | 26.66 |
| N    |      |     |     |   |    |        |        |        |      |       |
| ATOM | 2749 | CA  | LYS | A | 58 | 51.920 | 33.383 | 52.208 | 1.00 | 26.66 |
| C    |      |     |     |   |    |        |        |        |      |       |
| ATOM | 2750 | C   | LYS | A | 58 | 52.271 | 34.193 | 50.972 | 1.00 | 26.66 |
| C    |      |     |     |   |    |        |        |        |      |       |
| ATOM | 2751 | O   | LYS | A | 58 | 51.860 | 33.834 | 49.868 | 1.00 | 26.66 |
| O    |      |     |     |   |    |        |        |        |      |       |
| ATOM | 2752 | CB  | LYS | A | 58 | 52.906 | 32.218 | 52.363 | 1.00 | 26.66 |
| C    |      |     |     |   |    |        |        |        |      |       |
| ATOM | 2753 | CG  | LYS | A | 58 | 52.614 | 31.320 | 53.542 | 1.00 | 26.66 |
| C    |      |     |     |   |    |        |        |        |      |       |
| ATOM | 2754 | CD  | LYS | A | 58 | 53.387 | 30.023 | 53.466 | 1.00 | 26.66 |
| C    |      |     |     |   |    |        |        |        |      |       |
| ATOM | 2755 | CE  | LYS | A | 58 | 53.230 | 29.220 | 54.741 | 1.00 | 26.66 |
| C    |      |     |     |   |    |        |        |        |      |       |
| ATOM | 2756 | NZ  | LYS | A | 58 | 51.976 | 28.426 | 54.745 | 1.00 | 26.66 |
| N    |      |     |     |   |    |        |        |        |      |       |
| ATOM | 2757 | N   | TYR | A | 59 | 53.035 | 35.276 | 51.138 | 1.00 | 22.55 |
| N    |      |     |     |   |    |        |        |        |      |       |
| ATOM | 2758 | CA  | TYR | A | 59 | 53.344 | 36.119 | 49.987 | 1.00 | 22.55 |
| C    |      |     |     |   |    |        |        |        |      |       |
| ATOM | 2759 | C   | TYR | A | 59 | 54.845 | 36.361 | 49.878 | 1.00 | 22.55 |
| C    |      |     |     |   |    |        |        |        |      |       |
| ATOM | 2760 | O   | TYR | A | 59 | 55.517 | 36.590 | 50.885 | 1.00 | 22.55 |
| O    |      |     |     |   |    |        |        |        |      |       |
| ATOM | 2761 | CB  | TYR | A | 59 | 52.578 | 37.443 | 50.061 | 1.00 | 22.55 |
| C    |      |     |     |   |    |        |        |        |      |       |
| ATOM | 2762 | CG  | TYR | A | 59 | 51.077 | 37.248 | 50.045 | 1.00 | 22.55 |
| C    |      |     |     |   |    |        |        |        |      |       |
| ATOM | 2763 | CD1 | TYR | A | 59 | 50.319 | 37.443 | 51.186 | 1.00 | 22.55 |
| C    |      |     |     |   |    |        |        |        |      |       |
| ATOM | 2764 | CD2 | TYR | A | 59 | 50.426 | 36.843 | 48.889 | 1.00 | 22.55 |
| C    |      |     |     |   |    |        |        |        |      |       |
| ATOM | 2765 | CE1 | TYR | A | 59 | 48.951 | 37.255 | 51.175 | 1.00 | 22.55 |
| C    |      |     |     |   |    |        |        |        |      |       |
| ATOM | 2766 | CE2 | TYR | A | 59 | 49.060 | 36.651 | 48.870 | 1.00 | 22.55 |
| C    |      |     |     |   |    |        |        |        |      |       |
| ATOM | 2767 | CZ  | TYR | A | 59 | 48.328 | 36.858 | 50.014 | 1.00 | 22.55 |
| C    |      |     |     |   |    |        |        |        |      |       |
| ATOM | 2768 | OH  | TYR | A | 59 | 46.966 | 36.668 | 50.000 | 1.00 | 22.55 |

|      |      |     |     |   |    |        |        |        |      |       |
|------|------|-----|-----|---|----|--------|--------|--------|------|-------|
| O    |      |     |     |   |    |        |        |        |      |       |
| ATOM | 2769 | N   | TYR | A | 60 | 55.362 | 36.307 | 48.645 | 1.00 | 23.35 |
| N    |      |     |     |   |    |        |        |        |      |       |
| ATOM | 2770 | CA  | TYR | A | 60 | 56.793 | 36.349 | 48.339 | 1.00 | 23.35 |
| C    |      |     |     |   |    |        |        |        |      |       |
| ATOM | 2771 | C   | TYR | A | 60 | 57.074 | 37.419 | 47.285 | 1.00 | 23.35 |
| C    |      |     |     |   |    |        |        |        |      |       |
| ATOM | 2772 | O   | TYR | A | 60 | 56.160 | 38.066 | 46.770 | 1.00 | 23.35 |
| O    |      |     |     |   |    |        |        |        |      |       |
| ATOM | 2773 | CB  | TYR | A | 60 | 57.297 | 34.991 | 47.841 | 1.00 | 23.35 |
| C    |      |     |     |   |    |        |        |        |      |       |
| ATOM | 2774 | CG  | TYR | A | 60 | 57.047 | 33.836 | 48.776 | 1.00 | 23.35 |
| C    |      |     |     |   |    |        |        |        |      |       |
| ATOM | 2775 | CD1 | TYR | A | 60 | 57.978 | 33.489 | 49.738 | 1.00 | 23.35 |
| C    |      |     |     |   |    |        |        |        |      |       |
| ATOM | 2776 | CD2 | TYR | A | 60 | 55.893 | 33.074 | 48.677 | 1.00 | 23.35 |
| C    |      |     |     |   |    |        |        |        |      |       |
| ATOM | 2777 | CE1 | TYR | A | 60 | 57.765 | 32.436 | 50.584 | 1.00 | 23.35 |
| C    |      |     |     |   |    |        |        |        |      |       |
| ATOM | 2778 | CE2 | TYR | A | 60 | 55.671 | 32.016 | 49.519 | 1.00 | 23.35 |
| C    |      |     |     |   |    |        |        |        |      |       |
| ATOM | 2779 | CZ  | TYR | A | 60 | 56.609 | 31.696 | 50.469 | 1.00 | 23.35 |
| C    |      |     |     |   |    |        |        |        |      |       |
| ATOM | 2780 | OH  | TYR | A | 60 | 56.391 | 30.640 | 51.314 | 1.00 | 23.35 |
| O    |      |     |     |   |    |        |        |        |      |       |
| ATOM | 2781 | N   | ALA | A | 61 | 58.355 | 37.581 | 46.927 | 1.00 | 28.48 |
| N    |      |     |     |   |    |        |        |        |      |       |
| ATOM | 2782 | CA  | ALA | A | 61 | 58.798 | 38.687 | 46.081 | 1.00 | 28.48 |
| C    |      |     |     |   |    |        |        |        |      |       |
| ATOM | 2783 | C   | ALA | A | 61 | 59.374 | 38.264 | 44.724 | 1.00 | 28.48 |
| C    |      |     |     |   |    |        |        |        |      |       |
| ATOM | 2784 | O   | ALA | A | 61 | 60.317 | 38.899 | 44.244 | 1.00 | 28.48 |
| O    |      |     |     |   |    |        |        |        |      |       |
| ATOM | 2785 | CB  | ALA | A | 61 | 59.828 | 39.536 | 46.822 | 1.00 | 28.48 |
| C    |      |     |     |   |    |        |        |        |      |       |
| ATOM | 2786 | N   | ASP | A | 62 | 58.856 | 37.204 | 44.109 | 1.00 | 34.97 |
| N    |      |     |     |   |    |        |        |        |      |       |
| ATOM | 2787 | CA  | ASP | A | 62 | 59.034 | 36.937 | 42.677 | 1.00 | 34.97 |
| C    |      |     |     |   |    |        |        |        |      |       |
| ATOM | 2788 | C   | ASP | A | 62 | 60.432 | 36.503 | 42.261 | 1.00 | 34.97 |
| C    |      |     |     |   |    |        |        |        |      |       |
| ATOM | 2789 | O   | ASP | A | 62 | 60.627 | 36.061 | 41.127 | 1.00 | 34.97 |
| O    |      |     |     |   |    |        |        |        |      |       |
| ATOM | 2790 | CB  | ASP | A | 62 | 58.674 | 38.172 | 41.848 | 1.00 | 34.97 |
| C    |      |     |     |   |    |        |        |        |      |       |
| ATOM | 2791 | CG  | ASP | A | 62 | 57.242 | 38.181 | 41.414 | 1.00 | 34.97 |
| C    |      |     |     |   |    |        |        |        |      |       |
| ATOM | 2792 | OD1 | ASP | A | 62 | 56.522 | 37.216 | 41.734 | 1.00 | 34.97 |
| O    |      |     |     |   |    |        |        |        |      |       |
| ATOM | 2793 | OD2 | ASP | A | 62 | 56.836 | 39.155 | 40.754 | 1.00 | 34.97 |

|      |      |     |     |   |    |        |        |        |      |       |
|------|------|-----|-----|---|----|--------|--------|--------|------|-------|
| O    |      |     |     |   |    |        |        |        |      |       |
| ATOM | 2794 | N   | SER | A | 63 | 61.405 | 36.602 | 43.151 | 1.00 | 33.18 |
| N    |      |     |     |   |    |        |        |        |      |       |
| ATOM | 2795 | CA  | SER | A | 63 | 62.747 | 36.132 | 42.868 | 1.00 | 33.18 |
| C    |      |     |     |   |    |        |        |        |      |       |
| ATOM | 2796 | C   | SER | A | 63 | 63.236 | 35.145 | 43.906 | 1.00 | 33.18 |
| C    |      |     |     |   |    |        |        |        |      |       |
| ATOM | 2797 | O   | SER | A | 63 | 64.240 | 34.466 | 43.670 | 1.00 | 33.18 |
| O    |      |     |     |   |    |        |        |        |      |       |
| ATOM | 2798 | CB  | SER | A | 63 | 63.728 | 37.310 | 42.773 | 1.00 | 33.18 |
| C    |      |     |     |   |    |        |        |        |      |       |
| ATOM | 2799 | OG  | SER | A | 63 | 64.475 | 37.450 | 43.964 | 1.00 | 33.18 |
| O    |      |     |     |   |    |        |        |        |      |       |
| ATOM | 2800 | N   | LEU | A | 64 | 62.559 | 35.051 | 45.043 | 1.00 | 31.30 |
| N    |      |     |     |   |    |        |        |        |      |       |
| ATOM | 2801 | CA  | LEU | A | 64 | 62.778 | 33.998 | 46.014 | 1.00 | 31.30 |
| C    |      |     |     |   |    |        |        |        |      |       |
| ATOM | 2802 | C   | LEU | A | 64 | 61.642 | 32.993 | 46.027 | 1.00 | 31.30 |
| C    |      |     |     |   |    |        |        |        |      |       |
| ATOM | 2803 | O   | LEU | A | 64 | 61.675 | 32.063 | 46.835 | 1.00 | 31.30 |
| O    |      |     |     |   |    |        |        |        |      |       |
| ATOM | 2804 | CB  | LEU | A | 64 | 62.888 | 34.553 | 47.430 | 1.00 | 31.30 |
| C    |      |     |     |   |    |        |        |        |      |       |
| ATOM | 2805 | CG  | LEU | A | 64 | 61.689 | 35.433 | 47.750 | 1.00 | 31.30 |
| C    |      |     |     |   |    |        |        |        |      |       |
| ATOM | 2806 | CD1 | LEU | A | 64 | 61.552 | 35.411 | 49.197 | 1.00 | 31.30 |
| C    |      |     |     |   |    |        |        |        |      |       |
| ATOM | 2807 | CD2 | LEU | A | 64 | 61.941 | 36.852 | 47.343 | 1.00 | 31.30 |
| C    |      |     |     |   |    |        |        |        |      |       |
| ATOM | 2808 | N   | THR | A | 65 | 60.622 | 33.180 | 45.184 | 1.00 | 33.19 |
| N    |      |     |     |   |    |        |        |        |      |       |
| ATOM | 2809 | CA  | THR | A | 65 | 59.404 | 32.380 | 45.288 | 1.00 | 33.19 |
| C    |      |     |     |   |    |        |        |        |      |       |
| ATOM | 2810 | C   | THR | A | 65 | 59.697 | 30.891 | 45.175 | 1.00 | 33.19 |
| C    |      |     |     |   |    |        |        |        |      |       |
| ATOM | 2811 | O   | THR | A | 65 | 59.054 | 30.073 | 45.840 | 1.00 | 33.19 |
| O    |      |     |     |   |    |        |        |        |      |       |
| ATOM | 2812 | CB  | THR | A | 65 | 58.402 | 32.803 | 44.215 | 1.00 | 33.19 |
| C    |      |     |     |   |    |        |        |        |      |       |
| ATOM | 2813 | OG1 | THR | A | 65 | 58.176 | 34.212 | 44.298 | 1.00 | 33.19 |
| O    |      |     |     |   |    |        |        |        |      |       |
| ATOM | 2814 | CG2 | THR | A | 65 | 57.083 | 32.082 | 44.406 | 1.00 | 33.19 |
| C    |      |     |     |   |    |        |        |        |      |       |
| ATOM | 2815 | N   | GLY | A | 66 | 60.667 | 30.519 | 44.343 | 1.00 | 33.63 |
| N    |      |     |     |   |    |        |        |        |      |       |
| ATOM | 2816 | CA  | GLY | A | 66 | 60.953 | 29.107 | 44.159 | 1.00 | 33.63 |
| C    |      |     |     |   |    |        |        |        |      |       |
| ATOM | 2817 | C   | GLY | A | 66 | 61.652 | 28.479 | 45.350 | 1.00 | 33.63 |
| C    |      |     |     |   |    |        |        |        |      |       |
| ATOM | 2818 | O   | GLY | A | 66 | 61.260 | 27.408 | 45.819 | 1.00 | 33.63 |

|      |      |     |     |   |    |        |        |        |      |       |
|------|------|-----|-----|---|----|--------|--------|--------|------|-------|
| O    |      |     |     |   |    |        |        |        |      |       |
| ATOM | 2819 | N   | ARG | A | 67 | 62.688 | 29.137 | 45.863 | 1.00 | 35.90 |
| N    |      |     |     |   |    |        |        |        |      |       |
| ATOM | 2820 | CA  | ARG | A | 67 | 63.618 | 28.495 | 46.780 | 1.00 | 35.90 |
| C    |      |     |     |   |    |        |        |        |      |       |
| ATOM | 2821 | C   | ARG | A | 67 | 63.397 | 28.845 | 48.245 | 1.00 | 35.90 |
| C    |      |     |     |   |    |        |        |        |      |       |
| ATOM | 2822 | O   | ARG | A | 67 | 63.998 | 28.199 | 49.109 | 1.00 | 35.90 |
| O    |      |     |     |   |    |        |        |        |      |       |
| ATOM | 2823 | CB  | ARG | A | 67 | 65.057 | 28.851 | 46.392 | 1.00 | 35.90 |
| C    |      |     |     |   |    |        |        |        |      |       |
| ATOM | 2824 | CG  | ARG | A | 67 | 65.468 | 28.329 | 45.022 | 1.00 | 35.90 |
| C    |      |     |     |   |    |        |        |        |      |       |
| ATOM | 2825 | CD  | ARG | A | 67 | 66.928 | 28.603 | 44.740 | 1.00 | 35.90 |
| C    |      |     |     |   |    |        |        |        |      |       |
| ATOM | 2826 | NE  | ARG | A | 67 | 67.209 | 30.031 | 44.645 | 1.00 | 35.90 |
| N    |      |     |     |   |    |        |        |        |      |       |
| ATOM | 2827 | CZ  | ARG | A | 67 | 68.129 | 30.657 | 45.368 | 1.00 | 35.90 |
| C    |      |     |     |   |    |        |        |        |      |       |
| ATOM | 2828 | NH1 | ARG | A | 67 | 68.858 | 29.984 | 46.243 | 1.00 | 35.90 |
| N    |      |     |     |   |    |        |        |        |      |       |
| ATOM | 2829 | NH2 | ARG | A | 67 | 68.320 | 31.958 | 45.215 | 1.00 | 35.90 |
| N    |      |     |     |   |    |        |        |        |      |       |
| ATOM | 2830 | N   | PHE | A | 68 | 62.568 | 29.839 | 48.551 | 1.00 | 30.72 |
| N    |      |     |     |   |    |        |        |        |      |       |
| ATOM | 2831 | CA  | PHE | A | 68 | 62.376 | 30.314 | 49.915 | 1.00 | 30.72 |
| C    |      |     |     |   |    |        |        |        |      |       |
| ATOM | 2832 | C   | PHE | A | 68 | 60.942 | 30.039 | 50.344 | 1.00 | 30.72 |
| C    |      |     |     |   |    |        |        |        |      |       |
| ATOM | 2833 | O   | PHE | A | 68 | 60.007 | 30.307 | 49.586 | 1.00 | 30.72 |
| O    |      |     |     |   |    |        |        |        |      |       |
| ATOM | 2834 | CB  | PHE | A | 68 | 62.678 | 31.815 | 50.026 | 1.00 | 30.72 |
| C    |      |     |     |   |    |        |        |        |      |       |
| ATOM | 2835 | CG  | PHE | A | 68 | 64.135 | 32.169 | 49.866 | 1.00 | 30.72 |
| C    |      |     |     |   |    |        |        |        |      |       |
| ATOM | 2836 | CD1 | PHE | A | 68 | 64.835 | 32.761 | 50.898 | 1.00 | 30.72 |
| C    |      |     |     |   |    |        |        |        |      |       |
| ATOM | 2837 | CD2 | PHE | A | 68 | 64.801 | 31.927 | 48.682 | 1.00 | 30.72 |
| C    |      |     |     |   |    |        |        |        |      |       |
| ATOM | 2838 | CE1 | PHE | A | 68 | 66.165 | 33.101 | 50.747 | 1.00 | 30.72 |
| C    |      |     |     |   |    |        |        |        |      |       |
| ATOM | 2839 | CE2 | PHE | A | 68 | 66.130 | 32.259 | 48.535 | 1.00 | 30.72 |
| C    |      |     |     |   |    |        |        |        |      |       |
| ATOM | 2840 | CZ  | PHE | A | 68 | 66.811 | 32.843 | 49.569 | 1.00 | 30.72 |
| C    |      |     |     |   |    |        |        |        |      |       |
| ATOM | 2841 | N   | THR | A | 69 | 60.770 | 29.507 | 51.550 | 1.00 | 26.02 |
| N    |      |     |     |   |    |        |        |        |      |       |
| ATOM | 2842 | CA  | THR | A | 69 | 59.444 | 29.300 | 52.118 | 1.00 | 26.02 |
| C    |      |     |     |   |    |        |        |        |      |       |
| ATOM | 2843 | C   | THR | A | 69 | 59.412 | 29.794 | 53.560 | 1.00 | 26.02 |

|      |      |     |     |   |    |        |        |        |      |       |
|------|------|-----|-----|---|----|--------|--------|--------|------|-------|
| C    |      |     |     |   |    |        |        |        |      |       |
| ATOM | 2844 | O   | THR | A | 69 | 60.316 | 29.509 | 54.346 | 1.00 | 26.02 |
| O    |      |     |     |   |    |        |        |        |      |       |
| ATOM | 2845 | CB  | THR | A | 69 | 59.021 | 27.818 | 52.041 | 1.00 | 26.02 |
| C    |      |     |     |   |    |        |        |        |      |       |
| ATOM | 2846 | OG1 | THR | A | 69 | 57.827 | 27.612 | 52.804 | 1.00 | 26.02 |
| O    |      |     |     |   |    |        |        |        |      |       |
| ATOM | 2847 | CG2 | THR | A | 69 | 60.108 | 26.916 | 52.564 | 1.00 | 26.02 |
| C    |      |     |     |   |    |        |        |        |      |       |
| ATOM | 2848 | N   | ILE | A | 70 | 58.362 | 30.529 | 53.907 | 1.00 | 20.50 |
| N    |      |     |     |   |    |        |        |        |      |       |
| ATOM | 2849 | CA  | ILE | A | 70 | 58.229 | 31.147 | 55.221 | 1.00 | 20.50 |
| C    |      |     |     |   |    |        |        |        |      |       |
| ATOM | 2850 | C   | ILE | A | 70 | 57.194 | 30.370 | 56.025 | 1.00 | 20.50 |
| C    |      |     |     |   |    |        |        |        |      |       |
| ATOM | 2851 | O   | ILE | A | 70 | 56.222 | 29.857 | 55.463 | 1.00 | 20.50 |
| O    |      |     |     |   |    |        |        |        |      |       |
| ATOM | 2852 | CB  | ILE | A | 70 | 57.851 | 32.637 | 55.085 | 1.00 | 20.50 |
| C    |      |     |     |   |    |        |        |        |      |       |
| ATOM | 2853 | CG1 | ILE | A | 70 | 57.895 | 33.348 | 56.438 | 1.00 | 20.50 |
| C    |      |     |     |   |    |        |        |        |      |       |
| ATOM | 2854 | CG2 | ILE | A | 70 | 56.499 | 32.803 | 54.399 | 1.00 | 20.50 |
| C    |      |     |     |   |    |        |        |        |      |       |
| ATOM | 2855 | CD1 | ILE | A | 70 | 57.869 | 34.858 | 56.325 | 1.00 | 20.50 |
| C    |      |     |     |   |    |        |        |        |      |       |
| ATOM | 2856 | N   | SER | A | 71 | 57.412 | 30.263 | 57.335 | 1.00 | 21.23 |
| N    |      |     |     |   |    |        |        |        |      |       |
| ATOM | 2857 | CA  | SER | A | 71 | 56.469 | 29.562 | 58.200 | 1.00 | 21.23 |
| C    |      |     |     |   |    |        |        |        |      |       |
| ATOM | 2858 | C   | SER | A | 71 | 56.519 | 30.166 | 59.597 | 1.00 | 21.23 |
| C    |      |     |     |   |    |        |        |        |      |       |
| ATOM | 2859 | O   | SER | A | 71 | 57.419 | 30.934 | 59.924 | 1.00 | 21.23 |
| O    |      |     |     |   |    |        |        |        |      |       |
| ATOM | 2860 | CB  | SER | A | 71 | 56.761 | 28.057 | 58.239 | 1.00 | 21.23 |
| C    |      |     |     |   |    |        |        |        |      |       |
| ATOM | 2861 | OG  | SER | A | 71 | 57.693 | 27.745 | 59.250 | 1.00 | 21.23 |
| O    |      |     |     |   |    |        |        |        |      |       |
| ATOM | 2862 | N   | ARG | A | 72 | 55.521 | 29.842 | 60.418 | 1.00 | 21.11 |
| N    |      |     |     |   |    |        |        |        |      |       |
| ATOM | 2863 | CA  | ARG | A | 72 | 55.459 | 30.375 | 61.772 | 1.00 | 21.11 |
| C    |      |     |     |   |    |        |        |        |      |       |
| ATOM | 2864 | C   | ARG | A | 72 | 54.854 | 29.347 | 62.715 | 1.00 | 21.11 |
| C    |      |     |     |   |    |        |        |        |      |       |
| ATOM | 2865 | O   | ARG | A | 72 | 54.071 | 28.491 | 62.303 | 1.00 | 21.11 |
| O    |      |     |     |   |    |        |        |        |      |       |
| ATOM | 2866 | CB  | ARG | A | 72 | 54.639 | 31.680 | 61.843 | 1.00 | 21.11 |
| C    |      |     |     |   |    |        |        |        |      |       |
| ATOM | 2867 | CG  | ARG | A | 72 | 53.148 | 31.521 | 61.551 | 1.00 | 21.11 |
| C    |      |     |     |   |    |        |        |        |      |       |
| ATOM | 2868 | CD  | ARG | A | 72 | 52.428 | 32.863 | 61.506 | 1.00 | 21.11 |

|      |      |     |     |   |    |        |        |        |      |       |
|------|------|-----|-----|---|----|--------|--------|--------|------|-------|
| C    |      |     |     |   |    |        |        |        |      |       |
| ATOM | 2869 | NE  | ARG | A | 72 | 52.422 | 33.521 | 62.806 | 1.00 | 21.11 |
| N    |      |     |     |   |    |        |        |        |      |       |
| ATOM | 2870 | CZ  | ARG | A | 72 | 52.230 | 34.823 | 62.990 | 1.00 | 21.11 |
| C    |      |     |     |   |    |        |        |        |      |       |
| ATOM | 2871 | NH1 | ARG | A | 72 | 52.246 | 35.324 | 64.210 | 1.00 | 21.11 |
| N    |      |     |     |   |    |        |        |        |      |       |
| ATOM | 2872 | NH2 | ARG | A | 72 | 52.027 | 35.621 | 61.956 | 1.00 | 21.11 |
| N    |      |     |     |   |    |        |        |        |      |       |
| ATOM | 2873 | N   | ASP | A | 73 | 55.229 | 29.447 | 63.987 | 1.00 | 26.52 |
| N    |      |     |     |   |    |        |        |        |      |       |
| ATOM | 2874 | CA  | ASP | A | 73 | 54.645 | 28.659 | 65.066 | 1.00 | 26.52 |
| C    |      |     |     |   |    |        |        |        |      |       |
| ATOM | 2875 | C   | ASP | A | 73 | 54.186 | 29.630 | 66.144 | 1.00 | 26.52 |
| C    |      |     |     |   |    |        |        |        |      |       |
| ATOM | 2876 | O   | ASP | A | 73 | 55.013 | 30.236 | 66.834 | 1.00 | 26.52 |
| O    |      |     |     |   |    |        |        |        |      |       |
| ATOM | 2877 | CB  | ASP | A | 73 | 55.648 | 27.648 | 65.623 | 1.00 | 26.52 |
| C    |      |     |     |   |    |        |        |        |      |       |
| ATOM | 2878 | CG  | ASP | A | 73 | 54.992 | 26.584 | 66.484 | 1.00 | 26.52 |
| C    |      |     |     |   |    |        |        |        |      |       |
| ATOM | 2879 | OD1 | ASP | A | 73 | 55.559 | 25.480 | 66.590 | 1.00 | 26.52 |
| O    |      |     |     |   |    |        |        |        |      |       |
| ATOM | 2880 | OD2 | ASP | A | 73 | 53.916 | 26.846 | 67.055 | 1.00 | 26.52 |
| O    |      |     |     |   |    |        |        |        |      |       |
| ATOM | 2881 | N   | ASN | A | 74 | 52.868 | 29.784 | 66.279 | 1.00 | 26.33 |
| N    |      |     |     |   |    |        |        |        |      |       |
| ATOM | 2882 | CA  | ASN | A | 74 | 52.301 | 30.699 | 67.259 | 1.00 | 26.33 |
| C    |      |     |     |   |    |        |        |        |      |       |
| ATOM | 2883 | C   | ASN | A | 74 | 52.351 | 30.147 | 68.676 | 1.00 | 26.33 |
| C    |      |     |     |   |    |        |        |        |      |       |
| ATOM | 2884 | O   | ASN | A | 74 | 52.301 | 30.927 | 69.631 | 1.00 | 26.33 |
| O    |      |     |     |   |    |        |        |        |      |       |
| ATOM | 2885 | CB  | ASN | A | 74 | 50.859 | 31.040 | 66.881 | 1.00 | 26.33 |
| C    |      |     |     |   |    |        |        |        |      |       |
| ATOM | 2886 | CG  | ASN | A | 74 | 50.774 | 31.895 | 65.635 | 1.00 | 26.33 |
| C    |      |     |     |   |    |        |        |        |      |       |
| ATOM | 2887 | OD1 | ASN | A | 74 | 51.754 | 32.514 | 65.236 | 1.00 | 26.33 |
| O    |      |     |     |   |    |        |        |        |      |       |
| ATOM | 2888 | ND2 | ASN | A | 74 | 49.608 | 31.929 | 65.012 | 1.00 | 26.33 |
| N    |      |     |     |   |    |        |        |        |      |       |
| ATOM | 2889 | N   | SER | A | 75 | 52.457 | 28.828 | 68.834 | 1.00 | 28.76 |
| N    |      |     |     |   |    |        |        |        |      |       |
| ATOM | 2890 | CA  | SER | A | 75 | 52.576 | 28.255 | 70.170 | 1.00 | 28.76 |
| C    |      |     |     |   |    |        |        |        |      |       |
| ATOM | 2891 | C   | SER | A | 75 | 53.936 | 28.561 | 70.780 | 1.00 | 28.76 |
| C    |      |     |     |   |    |        |        |        |      |       |
| ATOM | 2892 | O   | SER | A | 75 | 54.039 | 28.813 | 71.984 | 1.00 | 28.76 |
| O    |      |     |     |   |    |        |        |        |      |       |
| ATOM | 2893 | CB  | SER | A | 75 | 52.328 | 26.749 | 70.120 | 1.00 | 28.76 |

|      |      |     |     |   |    |        |        |        |      |       |
|------|------|-----|-----|---|----|--------|--------|--------|------|-------|
| C    |      |     |     |   |    |        |        |        |      |       |
| ATOM | 2894 | OG  | SER | A | 75 | 53.412 | 26.068 | 69.522 | 1.00 | 28.76 |
| O    |      |     |     |   |    |        |        |        |      |       |
| ATOM | 2895 | N   | LYS | A | 76 | 54.989 | 28.552 | 69.964 | 1.00 | 29.03 |
| N    |      |     |     |   |    |        |        |        |      |       |
| ATOM | 2896 | CA  | LYS | A | 76 | 56.337 | 28.865 | 70.415 | 1.00 | 29.03 |
| C    |      |     |     |   |    |        |        |        |      |       |
| ATOM | 2897 | C   | LYS | A | 76 | 56.731 | 30.313 | 70.161 | 1.00 | 29.03 |
| C    |      |     |     |   |    |        |        |        |      |       |
| ATOM | 2898 | O   | LYS | A | 76 | 57.823 | 30.719 | 70.566 | 1.00 | 29.03 |
| O    |      |     |     |   |    |        |        |        |      |       |
| ATOM | 2899 | CB  | LYS | A | 76 | 57.346 | 27.940 | 69.733 | 1.00 | 29.03 |
| C    |      |     |     |   |    |        |        |        |      |       |
| ATOM | 2900 | CG  | LYS | A | 76 | 56.870 | 26.513 | 69.593 | 1.00 | 29.03 |
| C    |      |     |     |   |    |        |        |        |      |       |
| ATOM | 2901 | CD  | LYS | A | 76 | 57.989 | 25.607 | 69.136 | 1.00 | 29.03 |
| C    |      |     |     |   |    |        |        |        |      |       |
| ATOM | 2902 | CE  | LYS | A | 76 | 57.607 | 24.153 | 69.307 | 1.00 | 29.03 |
| C    |      |     |     |   |    |        |        |        |      |       |
| ATOM | 2903 | NZ  | LYS | A | 76 | 56.580 | 23.727 | 68.319 | 1.00 | 29.03 |
| N    |      |     |     |   |    |        |        |        |      |       |
| ATOM | 2904 | N   | ASN | A | 77 | 55.868 | 31.096 | 69.510 | 1.00 | 27.35 |
| N    |      |     |     |   |    |        |        |        |      |       |
| ATOM | 2905 | CA  | ASN | A | 77 | 56.158 | 32.486 | 69.155 | 1.00 | 27.35 |
| C    |      |     |     |   |    |        |        |        |      |       |
| ATOM | 2906 | C   | ASN | A | 77 | 57.416 | 32.597 | 68.293 | 1.00 | 27.35 |
| C    |      |     |     |   |    |        |        |        |      |       |
| ATOM | 2907 | O   | ASN | A | 77 | 58.286 | 33.429 | 68.539 | 1.00 | 27.35 |
| O    |      |     |     |   |    |        |        |        |      |       |
| ATOM | 2908 | CB  | ASN | A | 77 | 56.284 | 33.363 | 70.403 | 1.00 | 27.35 |
| C    |      |     |     |   |    |        |        |        |      |       |
| ATOM | 2909 | CG  | ASN | A | 77 | 54.999 | 33.438 | 71.196 | 1.00 | 27.35 |
| C    |      |     |     |   |    |        |        |        |      |       |
| ATOM | 2910 | OD1 | ASN | A | 77 | 53.939 | 33.046 | 70.720 | 1.00 | 27.35 |
| O    |      |     |     |   |    |        |        |        |      |       |
| ATOM | 2911 | ND2 | ASN | A | 77 | 55.090 | 33.948 | 72.412 | 1.00 | 27.35 |
| N    |      |     |     |   |    |        |        |        |      |       |
| ATOM | 2912 | N   | THR | A | 78 | 57.507 | 31.756 | 67.265 | 1.00 | 24.95 |
| N    |      |     |     |   |    |        |        |        |      |       |
| ATOM | 2913 | CA  | THR | A | 78 | 58.717 | 31.698 | 66.454 | 1.00 | 24.95 |
| C    |      |     |     |   |    |        |        |        |      |       |
| ATOM | 2914 | C   | THR | A | 78 | 58.391 | 31.800 | 64.971 | 1.00 | 24.95 |
| C    |      |     |     |   |    |        |        |        |      |       |
| ATOM | 2915 | O   | THR | A | 78 | 57.455 | 31.170 | 64.483 | 1.00 | 24.95 |
| O    |      |     |     |   |    |        |        |        |      |       |
| ATOM | 2916 | CB  | THR | A | 78 | 59.501 | 30.408 | 66.732 | 1.00 | 24.95 |
| C    |      |     |     |   |    |        |        |        |      |       |
| ATOM | 2917 | OG1 | THR | A | 78 | 59.799 | 30.334 | 68.128 | 1.00 | 24.95 |
| O    |      |     |     |   |    |        |        |        |      |       |
| ATOM | 2918 | CG2 | THR | A | 78 | 60.804 | 30.396 | 65.961 | 1.00 | 24.95 |

|      |      |     |     |   |    |        |        |        |      |       |
|------|------|-----|-----|---|----|--------|--------|--------|------|-------|
| C    |      |     |     |   |    |        |        |        |      |       |
| ATOM | 2919 | N   | LEU | A | 79 | 59.186 | 32.591 | 64.258 | 1.00 | 21.29 |
| N    |      |     |     |   |    |        |        |        |      |       |
| ATOM | 2920 | CA  | LEU | A | 79 | 59.093 | 32.761 | 62.818 | 1.00 | 21.29 |
| C    |      |     |     |   |    |        |        |        |      |       |
| ATOM | 2921 | C   | LEU | A | 79 | 60.247 | 32.016 | 62.159 | 1.00 | 21.29 |
| C    |      |     |     |   |    |        |        |        |      |       |
| ATOM | 2922 | O   | LEU | A | 79 | 61.359 | 32.017 | 62.680 | 1.00 | 21.29 |
| O    |      |     |     |   |    |        |        |        |      |       |
| ATOM | 2923 | CB  | LEU | A | 79 | 59.144 | 34.250 | 62.467 | 1.00 | 21.29 |
| C    |      |     |     |   |    |        |        |        |      |       |
| ATOM | 2924 | CG  | LEU | A | 79 | 59.212 | 34.684 | 61.009 | 1.00 | 21.29 |
| C    |      |     |     |   |    |        |        |        |      |       |
| ATOM | 2925 | CD1 | LEU | A | 79 | 57.894 | 34.414 | 60.328 | 1.00 | 21.29 |
| C    |      |     |     |   |    |        |        |        |      |       |
| ATOM | 2926 | CD2 | LEU | A | 79 | 59.577 | 36.157 | 60.934 | 1.00 | 21.29 |
| C    |      |     |     |   |    |        |        |        |      |       |
| ATOM | 2927 | N   | TYR | A | 80 | 59.988 | 31.379 | 61.018 | 1.00 | 23.26 |
| N    |      |     |     |   |    |        |        |        |      |       |
| ATOM | 2928 | CA  | TYR | A | 80 | 60.979 | 30.579 | 60.312 | 1.00 | 23.26 |
| C    |      |     |     |   |    |        |        |        |      |       |
| ATOM | 2929 | C   | TYR | A | 80 | 61.058 | 30.988 | 58.852 | 1.00 | 23.26 |
| C    |      |     |     |   |    |        |        |        |      |       |
| ATOM | 2930 | O   | TYR | A | 80 | 60.035 | 31.258 | 58.218 | 1.00 | 23.26 |
| O    |      |     |     |   |    |        |        |        |      |       |
| ATOM | 2931 | CB  | TYR | A | 80 | 60.646 | 29.082 | 60.359 | 1.00 | 23.26 |
| C    |      |     |     |   |    |        |        |        |      |       |
| ATOM | 2932 | CG  | TYR | A | 80 | 60.483 | 28.499 | 61.735 | 1.00 | 23.26 |
| C    |      |     |     |   |    |        |        |        |      |       |
| ATOM | 2933 | CD1 | TYR | A | 80 | 61.583 | 28.242 | 62.532 | 1.00 | 23.26 |
| C    |      |     |     |   |    |        |        |        |      |       |
| ATOM | 2934 | CD2 | TYR | A | 80 | 59.227 | 28.180 | 62.228 | 1.00 | 23.26 |
| C    |      |     |     |   |    |        |        |        |      |       |
| ATOM | 2935 | CE1 | TYR | A | 80 | 61.439 | 27.697 | 63.784 | 1.00 | 23.26 |
| C    |      |     |     |   |    |        |        |        |      |       |
| ATOM | 2936 | CE2 | TYR | A | 80 | 59.075 | 27.638 | 63.481 | 1.00 | 23.26 |
| C    |      |     |     |   |    |        |        |        |      |       |
| ATOM | 2937 | CZ  | TYR | A | 80 | 60.184 | 27.400 | 64.254 | 1.00 | 23.26 |
| C    |      |     |     |   |    |        |        |        |      |       |
| ATOM | 2938 | OH  | TYR | A | 80 | 60.036 | 26.857 | 65.507 | 1.00 | 23.26 |
| O    |      |     |     |   |    |        |        |        |      |       |
| ATOM | 2939 | N   | LEU | A | 81 | 62.275 | 30.982 | 58.312 | 1.00 | 24.24 |
| N    |      |     |     |   |    |        |        |        |      |       |
| ATOM | 2940 | CA  | LEU | A | 81 | 62.502 | 31.085 | 56.878 | 1.00 | 24.24 |
| C    |      |     |     |   |    |        |        |        |      |       |
| ATOM | 2941 | C   | LEU | A | 81 | 63.383 | 29.918 | 56.456 | 1.00 | 24.24 |
| C    |      |     |     |   |    |        |        |        |      |       |
| ATOM | 2942 | O   | LEU | A | 81 | 64.447 | 29.702 | 57.037 | 1.00 | 24.24 |
| O    |      |     |     |   |    |        |        |        |      |       |
| ATOM | 2943 | CB  | LEU | A | 81 | 63.157 | 32.422 | 56.504 | 1.00 | 24.24 |



|      |      |     |     |   |    |        |        |        |      |       |
|------|------|-----|-----|---|----|--------|--------|--------|------|-------|
| C    |      |     |     |   |    |        |        |        |      |       |
| ATOM | 2944 | CG  | LEU | A | 81 | 63.353 | 32.721 | 55.016 | 1.00 | 24.24 |
| C    |      |     |     |   |    |        |        |        |      |       |
| ATOM | 2945 | CD1 | LEU | A | 81 | 62.025 | 32.823 | 54.291 | 1.00 | 24.24 |
| C    |      |     |     |   |    |        |        |        |      |       |
| ATOM | 2946 | CD2 | LEU | A | 81 | 64.162 | 33.995 | 54.825 | 1.00 | 24.24 |
| C    |      |     |     |   |    |        |        |        |      |       |
| ATOM | 2947 | N   | GLN | A | 82 | 62.933 | 29.165 | 55.461 | 1.00 | 32.03 |
| N    |      |     |     |   |    |        |        |        |      |       |
| ATOM | 2948 | CA  | GLN | A | 82 | 63.648 | 28.011 | 54.933 | 1.00 | 32.03 |
| C    |      |     |     |   |    |        |        |        |      |       |
| ATOM | 2949 | C   | GLN | A | 82 | 64.130 | 28.344 | 53.531 | 1.00 | 32.03 |
| C    |      |     |     |   |    |        |        |        |      |       |
| ATOM | 2950 | O   | GLN | A | 82 | 63.324 | 28.707 | 52.669 | 1.00 | 32.03 |
| O    |      |     |     |   |    |        |        |        |      |       |
| ATOM | 2951 | CB  | GLN | A | 82 | 62.738 | 26.780 | 54.913 | 1.00 | 32.03 |
| C    |      |     |     |   |    |        |        |        |      |       |
| ATOM | 2952 | CG  | GLN | A | 82 | 63.352 | 25.535 | 54.294 | 1.00 | 32.03 |
| C    |      |     |     |   |    |        |        |        |      |       |
| ATOM | 2953 | CD  | GLN | A | 82 | 64.504 | 24.984 | 55.095 | 1.00 | 32.03 |
| C    |      |     |     |   |    |        |        |        |      |       |
| ATOM | 2954 | OE1 | GLN | A | 82 | 64.454 | 24.933 | 56.320 | 1.00 | 32.03 |
| O    |      |     |     |   |    |        |        |        |      |       |
| ATOM | 2955 | NE2 | GLN | A | 82 | 65.557 | 24.570 | 54.404 | 1.00 | 32.03 |
| N    |      |     |     |   |    |        |        |        |      |       |
| ATOM | 2956 | N   | MET | A | 83 | 65.434 | 28.227 | 53.301 | 1.00 | 35.31 |
| N    |      |     |     |   |    |        |        |        |      |       |
| ATOM | 2957 | CA  | MET | A | 83 | 66.017 | 28.469 | 51.992 | 1.00 | 35.31 |
| C    |      |     |     |   |    |        |        |        |      |       |
| ATOM | 2958 | C   | MET | A | 83 | 66.651 | 27.193 | 51.466 | 1.00 | 35.31 |
| C    |      |     |     |   |    |        |        |        |      |       |
| ATOM | 2959 | O   | MET | A | 83 | 67.370 | 26.505 | 52.196 | 1.00 | 35.31 |
| O    |      |     |     |   |    |        |        |        |      |       |
| ATOM | 2960 | CB  | MET | A | 83 | 67.065 | 29.578 | 52.021 | 1.00 | 35.31 |
| C    |      |     |     |   |    |        |        |        |      |       |
| ATOM | 2961 | CG  | MET | A | 83 | 66.821 | 30.705 | 52.988 | 1.00 | 35.31 |
| C    |      |     |     |   |    |        |        |        |      |       |
| ATOM | 2962 | SD  | MET | A | 83 | 68.392 | 31.477 | 53.394 | 1.00 | 35.31 |
| S    |      |     |     |   |    |        |        |        |      |       |
| ATOM | 2963 | CE  | MET | A | 83 | 67.878 | 32.558 | 54.684 | 1.00 | 35.31 |
| C    |      |     |     |   |    |        |        |        |      |       |
| ATOM | 2964 | N   | ASN | A | 84 | 66.402 | 26.906 | 50.195 | 1.00 | 41.01 |
| N    |      |     |     |   |    |        |        |        |      |       |
| ATOM | 2965 | CA  | ASN | A | 84 | 66.873 | 25.697 | 49.537 | 1.00 | 41.01 |
| C    |      |     |     |   |    |        |        |        |      |       |
| ATOM | 2966 | C   | ASN | A | 84 | 67.929 | 26.042 | 48.498 | 1.00 | 41.01 |
| C    |      |     |     |   |    |        |        |        |      |       |
| ATOM | 2967 | O   | ASN | A | 84 | 67.713 | 26.926 | 47.663 | 1.00 | 41.01 |
| O    |      |     |     |   |    |        |        |        |      |       |
| ATOM | 2968 | CB  | ASN | A | 84 | 65.710 | 24.968 | 48.869 | 1.00 | 41.01 |

|      |      |     |     |   |    |        |        |        |      |       |
|------|------|-----|-----|---|----|--------|--------|--------|------|-------|
| C    |      |     |     |   |    |        |        |        |      |       |
| ATOM | 2969 | CG  | ASN | A | 84 | 64.682 | 24.491 | 49.860 | 1.00 | 41.01 |
| C    |      |     |     |   |    |        |        |        |      |       |
| ATOM | 2970 | OD1 | ASN | A | 84 | 65.014 | 24.112 | 50.980 | 1.00 | 41.01 |
| O    |      |     |     |   |    |        |        |        |      |       |
| ATOM | 2971 | ND2 | ASN | A | 84 | 63.420 | 24.518 | 49.459 | 1.00 | 41.01 |
| N    |      |     |     |   |    |        |        |        |      |       |
| ATOM | 2972 | N   | SER | A | 85 | 69.063 | 25.338 | 48.550 | 1.00 | 43.61 |
| N    |      |     |     |   |    |        |        |        |      |       |
| ATOM | 2973 | CA  | SER | A | 85 | 70.098 | 25.389 | 47.516 | 1.00 | 43.61 |
| C    |      |     |     |   |    |        |        |        |      |       |
| ATOM | 2974 | C   | SER | A | 85 | 70.614 | 26.818 | 47.317 | 1.00 | 43.61 |
| C    |      |     |     |   |    |        |        |        |      |       |
| ATOM | 2975 | O   | SER | A | 85 | 70.392 | 27.460 | 46.291 | 1.00 | 43.61 |
| O    |      |     |     |   |    |        |        |        |      |       |
| ATOM | 2976 | CB  | SER | A | 85 | 69.582 | 24.798 | 46.199 | 1.00 | 43.61 |
| C    |      |     |     |   |    |        |        |        |      |       |
| ATOM | 2977 | OG  | SER | A | 85 | 68.698 | 25.693 | 45.553 | 1.00 | 43.61 |
| O    |      |     |     |   |    |        |        |        |      |       |
| ATOM | 2978 | N   | LEU | A | 86 | 71.294 | 27.304 | 48.350 | 1.00 | 42.85 |
| N    |      |     |     |   |    |        |        |        |      |       |
| ATOM | 2979 | CA  | LEU | A | 86 | 71.771 | 28.679 | 48.349 | 1.00 | 42.85 |
| C    |      |     |     |   |    |        |        |        |      |       |
| ATOM | 2980 | C   | LEU | A | 86 | 72.818 | 28.905 | 47.265 | 1.00 | 42.85 |
| C    |      |     |     |   |    |        |        |        |      |       |
| ATOM | 2981 | O   | LEU | A | 86 | 73.733 | 28.099 | 47.081 | 1.00 | 42.85 |
| O    |      |     |     |   |    |        |        |        |      |       |
| ATOM | 2982 | CB  | LEU | A | 86 | 72.343 | 29.029 | 49.721 | 1.00 | 42.85 |
| C    |      |     |     |   |    |        |        |        |      |       |
| ATOM | 2983 | CG  | LEU | A | 86 | 71.258 | 29.238 | 50.780 | 1.00 | 42.85 |
| C    |      |     |     |   |    |        |        |        |      |       |
| ATOM | 2984 | CD1 | LEU | A | 86 | 71.842 | 29.741 | 52.080 | 1.00 | 42.85 |
| C    |      |     |     |   |    |        |        |        |      |       |
| ATOM | 2985 | CD2 | LEU | A | 86 | 70.221 | 30.208 | 50.262 | 1.00 | 42.85 |
| C    |      |     |     |   |    |        |        |        |      |       |
| ATOM | 2986 | N   | ARG | A | 87 | 72.675 | 30.017 | 46.545 | 1.00 | 45.02 |
| N    |      |     |     |   |    |        |        |        |      |       |
| ATOM | 2987 | CA  | ARG | A | 87 | 73.621 | 30.441 | 45.526 | 1.00 | 45.02 |
| C    |      |     |     |   |    |        |        |        |      |       |
| ATOM | 2988 | C   | ARG | A | 87 | 74.525 | 31.543 | 46.073 | 1.00 | 45.02 |
| C    |      |     |     |   |    |        |        |        |      |       |
| ATOM | 2989 | O   | ARG | A | 87 | 74.364 | 32.017 | 47.198 | 1.00 | 45.02 |
| O    |      |     |     |   |    |        |        |        |      |       |
| ATOM | 2990 | CB  | ARG | A | 87 | 72.889 | 30.930 | 44.278 | 1.00 | 45.02 |
| C    |      |     |     |   |    |        |        |        |      |       |
| ATOM | 2991 | CG  | ARG | A | 87 | 71.642 | 30.159 | 43.922 | 1.00 | 45.02 |
| C    |      |     |     |   |    |        |        |        |      |       |
| ATOM | 2992 | CD  | ARG | A | 87 | 70.999 | 30.753 | 42.684 | 1.00 | 45.02 |
| C    |      |     |     |   |    |        |        |        |      |       |
| ATOM | 2993 | NE  | ARG | A | 87 | 69.720 | 30.131 | 42.360 | 1.00 | 45.02 |

|      |      |     |     |   |    |        |        |        |      |       |
|------|------|-----|-----|---|----|--------|--------|--------|------|-------|
| N    |      |     |     |   |    |        |        |        |      |       |
| ATOM | 2994 | CZ  | ARG | A | 87 | 69.591 | 28.940 | 41.784 | 1.00 | 45.02 |
| C    |      |     |     |   |    |        |        |        |      |       |
| ATOM | 2995 | NH1 | ARG | A | 87 | 70.667 | 28.232 | 41.470 | 1.00 | 45.02 |
| N    |      |     |     |   |    |        |        |        |      |       |
| ATOM | 2996 | NH2 | ARG | A | 87 | 68.385 | 28.455 | 41.523 | 1.00 | 45.02 |
| N    |      |     |     |   |    |        |        |        |      |       |
| ATOM | 2997 | N   | ALA | A | 88 | 75.478 | 31.974 | 45.243 | 1.00 | 44.00 |
| N    |      |     |     |   |    |        |        |        |      |       |
| ATOM | 2998 | CA  | ALA | A | 88 | 76.434 | 32.993 | 45.667 | 1.00 | 44.00 |
| C    |      |     |     |   |    |        |        |        |      |       |
| ATOM | 2999 | C   | ALA | A | 88 | 75.752 | 34.331 | 45.927 | 1.00 | 44.00 |
| C    |      |     |     |   |    |        |        |        |      |       |
| ATOM | 3000 | O   | ALA | A | 88 | 76.131 | 35.058 | 46.851 | 1.00 | 44.00 |
| O    |      |     |     |   |    |        |        |        |      |       |
| ATOM | 3001 | CB  | ALA | A | 88 | 77.534 | 33.149 | 44.619 | 1.00 | 44.00 |
| C    |      |     |     |   |    |        |        |        |      |       |
| ATOM | 3002 | N   | GLU | A | 89 | 74.749 | 34.674 | 45.124 | 1.00 | 44.35 |
| N    |      |     |     |   |    |        |        |        |      |       |
| ATOM | 3003 | CA  | GLU | A | 89 | 74.059 | 35.948 | 45.274 | 1.00 | 44.35 |
| C    |      |     |     |   |    |        |        |        |      |       |
| ATOM | 3004 | C   | GLU | A | 89 | 73.097 | 35.975 | 46.453 | 1.00 | 44.35 |
| C    |      |     |     |   |    |        |        |        |      |       |
| ATOM | 3005 | O   | GLU | A | 89 | 72.541 | 37.036 | 46.748 | 1.00 | 44.35 |
| O    |      |     |     |   |    |        |        |        |      |       |
| ATOM | 3006 | CB  | GLU | A | 89 | 73.294 | 36.292 | 43.995 | 1.00 | 44.35 |
| C    |      |     |     |   |    |        |        |        |      |       |
| ATOM | 3007 | CG  | GLU | A | 89 | 74.120 | 36.187 | 42.729 | 1.00 | 44.35 |
| C    |      |     |     |   |    |        |        |        |      |       |
| ATOM | 3008 | CD  | GLU | A | 89 | 75.528 | 36.712 | 42.908 | 1.00 | 44.35 |
| C    |      |     |     |   |    |        |        |        |      |       |
| ATOM | 3009 | OE1 | GLU | A | 89 | 75.683 | 37.907 | 43.231 | 1.00 | 44.35 |
| O    |      |     |     |   |    |        |        |        |      |       |
| ATOM | 3010 | OE2 | GLU | A | 89 | 76.481 | 35.927 | 42.729 | 1.00 | 44.35 |
| O    |      |     |     |   |    |        |        |        |      |       |
| ATOM | 3011 | N   | ASP | A | 90 | 72.876 | 34.844 | 47.120 | 1.00 | 38.14 |
| N    |      |     |     |   |    |        |        |        |      |       |
| ATOM | 3012 | CA  | ASP | A | 90 | 71.997 | 34.808 | 48.278 | 1.00 | 38.14 |
| C    |      |     |     |   |    |        |        |        |      |       |
| ATOM | 3013 | C   | ASP | A | 90 | 72.659 | 35.351 | 49.539 | 1.00 | 38.14 |
| C    |      |     |     |   |    |        |        |        |      |       |
| ATOM | 3014 | O   | ASP | A | 90 | 71.979 | 35.492 | 50.559 | 1.00 | 38.14 |
| O    |      |     |     |   |    |        |        |        |      |       |
| ATOM | 3015 | CB  | ASP | A | 90 | 71.509 | 33.375 | 48.514 | 1.00 | 38.14 |
| C    |      |     |     |   |    |        |        |        |      |       |
| ATOM | 3016 | CG  | ASP | A | 90 | 70.645 | 32.862 | 47.380 | 1.00 | 38.14 |
| C    |      |     |     |   |    |        |        |        |      |       |
| ATOM | 3017 | OD1 | ASP | A | 90 | 70.236 | 33.669 | 46.528 | 1.00 | 38.14 |
| O    |      |     |     |   |    |        |        |        |      |       |
| ATOM | 3018 | OD2 | ASP | A | 90 | 70.369 | 31.647 | 47.339 | 1.00 | 38.14 |

|      |      |     |     |   |    |        |        |        |      |       |
|------|------|-----|-----|---|----|--------|--------|--------|------|-------|
| O    |      |     |     |   |    |        |        |        |      |       |
| ATOM | 3019 | N   | THR | A | 91 | 73.953 | 35.658 | 49.490 | 1.00 | 32.30 |
| N    |      |     |     |   |    |        |        |        |      |       |
| ATOM | 3020 | CA  | THR | A | 91 | 74.661 | 36.231 | 50.630 | 1.00 | 32.30 |
| C    |      |     |     |   |    |        |        |        |      |       |
| ATOM | 3021 | C   | THR | A | 91 | 74.067 | 37.581 | 51.015 | 1.00 | 32.30 |
| C    |      |     |     |   |    |        |        |        |      |       |
| ATOM | 3022 | O   | THR | A | 91 | 74.021 | 38.497 | 50.191 | 1.00 | 32.30 |
| O    |      |     |     |   |    |        |        |        |      |       |
| ATOM | 3023 | CB  | THR | A | 91 | 76.140 | 36.396 | 50.284 | 1.00 | 32.30 |
| C    |      |     |     |   |    |        |        |        |      |       |
| ATOM | 3024 | OG1 | THR | A | 91 | 76.726 | 35.109 | 50.052 | 1.00 | 32.30 |
| O    |      |     |     |   |    |        |        |        |      |       |
| ATOM | 3025 | CG2 | THR | A | 91 | 76.875 | 37.093 | 51.405 | 1.00 | 32.30 |
| C    |      |     |     |   |    |        |        |        |      |       |
| ATOM | 3026 | N   | ALA | A | 92 | 73.644 | 37.714 | 52.271 | 1.00 | 23.56 |
| N    |      |     |     |   |    |        |        |        |      |       |
| ATOM | 3027 | CA  | ALA | A | 92 | 72.968 | 38.932 | 52.710 | 1.00 | 23.56 |
| C    |      |     |     |   |    |        |        |        |      |       |
| ATOM | 3028 | C   | ALA | A | 92 | 72.791 | 38.910 | 54.220 | 1.00 | 23.56 |
| C    |      |     |     |   |    |        |        |        |      |       |
| ATOM | 3029 | O   | ALA | A | 92 | 72.874 | 37.859 | 54.856 | 1.00 | 23.56 |
| O    |      |     |     |   |    |        |        |        |      |       |
| ATOM | 3030 | CB  | ALA | A | 92 | 71.604 | 39.094 | 52.030 | 1.00 | 23.56 |
| C    |      |     |     |   |    |        |        |        |      |       |
| ATOM | 3031 | N   | VAL | A | 93 | 72.521 | 40.081 | 54.780 | 1.00 | 20.17 |
| N    |      |     |     |   |    |        |        |        |      |       |
| ATOM | 3032 | CA  | VAL | A | 93 | 72.068 | 40.206 | 56.158 | 1.00 | 20.17 |
| C    |      |     |     |   |    |        |        |        |      |       |
| ATOM | 3033 | C   | VAL | A | 93 | 70.546 | 40.203 | 56.153 | 1.00 | 20.17 |
| C    |      |     |     |   |    |        |        |        |      |       |
| ATOM | 3034 | O   | VAL | A | 93 | 69.922 | 40.973 | 55.420 | 1.00 | 20.17 |
| O    |      |     |     |   |    |        |        |        |      |       |
| ATOM | 3035 | CB  | VAL | A | 93 | 72.610 | 41.491 | 56.802 | 1.00 | 20.17 |
| C    |      |     |     |   |    |        |        |        |      |       |
| ATOM | 3036 | CG1 | VAL | A | 93 | 72.168 | 41.591 | 58.242 | 1.00 | 20.17 |
| C    |      |     |     |   |    |        |        |        |      |       |
| ATOM | 3037 | CG2 | VAL | A | 93 | 74.122 | 41.532 | 56.702 | 1.00 | 20.17 |
| C    |      |     |     |   |    |        |        |        |      |       |
| ATOM | 3038 | N   | TYR | A | 94 | 69.948 | 39.341 | 56.966 | 1.00 | 19.75 |
| N    |      |     |     |   |    |        |        |        |      |       |
| ATOM | 3039 | CA  | TYR | A | 94 | 68.501 | 39.180 | 57.028 | 1.00 | 19.75 |
| C    |      |     |     |   |    |        |        |        |      |       |
| ATOM | 3040 | C   | TYR | A | 94 | 67.974 | 39.786 | 58.321 | 1.00 | 19.75 |
| C    |      |     |     |   |    |        |        |        |      |       |
| ATOM | 3041 | O   | TYR | A | 94 | 68.486 | 39.492 | 59.403 | 1.00 | 19.75 |
| O    |      |     |     |   |    |        |        |        |      |       |
| ATOM | 3042 | CB  | TYR | A | 94 | 68.113 | 37.702 | 56.932 | 1.00 | 19.75 |
| C    |      |     |     |   |    |        |        |        |      |       |
| ATOM | 3043 | CG  | TYR | A | 94 | 68.269 | 37.127 | 55.547 | 1.00 | 19.75 |

|      |      |     |     |   |    |        |        |        |      |       |
|------|------|-----|-----|---|----|--------|--------|--------|------|-------|
| C    |      |     |     |   |    |        |        |        |      |       |
| ATOM | 3044 | CD1 | TYR | A | 94 | 67.171 | 36.924 | 54.727 | 1.00 | 19.75 |
| C    |      |     |     |   |    |        |        |        |      |       |
| ATOM | 3045 | CD2 | TYR | A | 94 | 69.519 | 36.793 | 55.055 | 1.00 | 19.75 |
| C    |      |     |     |   |    |        |        |        |      |       |
| ATOM | 3046 | CE1 | TYR | A | 94 | 67.318 | 36.411 | 53.461 | 1.00 | 19.75 |
| C    |      |     |     |   |    |        |        |        |      |       |
| ATOM | 3047 | CE2 | TYR | A | 94 | 69.672 | 36.280 | 53.795 | 1.00 | 19.75 |
| C    |      |     |     |   |    |        |        |        |      |       |
| ATOM | 3048 | CZ  | TYR | A | 94 | 68.571 | 36.088 | 53.001 | 1.00 | 19.75 |
| C    |      |     |     |   |    |        |        |        |      |       |
| ATOM | 3049 | OH  | TYR | A | 94 | 68.727 | 35.578 | 51.739 | 1.00 | 19.75 |
| O    |      |     |     |   |    |        |        |        |      |       |
| ATOM | 3050 | N   | TYR | A | 95 | 66.953 | 40.628 | 58.202 | 1.00 | 21.79 |
| N    |      |     |     |   |    |        |        |        |      |       |
| ATOM | 3051 | CA  | TYR | A | 95 | 66.292 | 41.281 | 59.318 | 1.00 | 21.79 |
| C    |      |     |     |   |    |        |        |        |      |       |
| ATOM | 3052 | C   | TYR | A | 95 | 64.868 | 40.758 | 59.459 | 1.00 | 21.79 |
| C    |      |     |     |   |    |        |        |        |      |       |
| ATOM | 3053 | O   | TYR | A | 95 | 64.164 | 40.566 | 58.464 | 1.00 | 21.79 |
| O    |      |     |     |   |    |        |        |        |      |       |
| ATOM | 3054 | CB  | TYR | A | 95 | 66.223 | 42.794 | 59.125 | 1.00 | 21.79 |
| C    |      |     |     |   |    |        |        |        |      |       |
| ATOM | 3055 | CG  | TYR | A | 95 | 67.539 | 43.497 | 58.903 | 1.00 | 21.79 |
| C    |      |     |     |   |    |        |        |        |      |       |
| ATOM | 3056 | CD1 | TYR | A | 95 | 68.348 | 43.848 | 59.969 | 1.00 | 21.79 |
| C    |      |     |     |   |    |        |        |        |      |       |
| ATOM | 3057 | CD2 | TYR | A | 95 | 67.940 | 43.859 | 57.628 | 1.00 | 21.79 |
| C    |      |     |     |   |    |        |        |        |      |       |
| ATOM | 3058 | CE1 | TYR | A | 95 | 69.540 | 44.514 | 59.766 | 1.00 | 21.79 |
| C    |      |     |     |   |    |        |        |        |      |       |
| ATOM | 3059 | CE2 | TYR | A | 95 | 69.127 | 44.525 | 57.417 | 1.00 | 21.79 |
| C    |      |     |     |   |    |        |        |        |      |       |
| ATOM | 3060 | CZ  | TYR | A | 95 | 69.921 | 44.847 | 58.488 | 1.00 | 21.79 |
| C    |      |     |     |   |    |        |        |        |      |       |
| ATOM | 3061 | OH  | TYR | A | 95 | 71.107 | 45.511 | 58.281 | 1.00 | 21.79 |
| O    |      |     |     |   |    |        |        |        |      |       |
| ATOM | 3062 | N   | CYS | A | 96 | 64.447 | 40.575 | 60.703 | 1.00 | 21.29 |
| N    |      |     |     |   |    |        |        |        |      |       |
| ATOM | 3063 | CA  | CYS | A | 96 | 63.102 | 40.152 | 61.067 | 1.00 | 21.29 |
| C    |      |     |     |   |    |        |        |        |      |       |
| ATOM | 3064 | C   | CYS | A | 96 | 62.245 | 41.380 | 61.372 | 1.00 | 21.29 |
| C    |      |     |     |   |    |        |        |        |      |       |
| ATOM | 3065 | O   | CYS | A | 96 | 62.719 | 42.325 | 62.003 | 1.00 | 21.29 |
| O    |      |     |     |   |    |        |        |        |      |       |
| ATOM | 3066 | CB  | CYS | A | 96 | 63.191 | 39.230 | 62.289 | 1.00 | 21.29 |
| C    |      |     |     |   |    |        |        |        |      |       |
| ATOM | 3067 | SG  | CYS | A | 96 | 61.717 | 38.366 | 62.800 | 1.00 | 21.29 |
| S    |      |     |     |   |    |        |        |        |      |       |
| ATOM | 3068 | N   | ALA | A | 97 | 60.986 | 41.375 | 60.928 | 1.00 | 17.02 |

|      |      |    |     |   |     |        |        |        |      |       |
|------|------|----|-----|---|-----|--------|--------|--------|------|-------|
| N    |      |    |     |   |     |        |        |        |      |       |
| ATOM | 3069 | CA | ALA | A | 97  | 60.125 | 42.543 | 61.085 | 1.00 | 17.02 |
| C    |      |    |     |   |     |        |        |        |      |       |
| ATOM | 3070 | C  | ALA | A | 97  | 58.677 | 42.103 | 61.263 | 1.00 | 17.02 |
| C    |      |    |     |   |     |        |        |        |      |       |
| ATOM | 3071 | O  | ALA | A | 97  | 58.315 | 40.973 | 60.947 | 1.00 | 17.02 |
| O    |      |    |     |   |     |        |        |        |      |       |
| ATOM | 3072 | CB | ALA | A | 97  | 60.250 | 43.487 | 59.885 | 1.00 | 17.02 |
| C    |      |    |     |   |     |        |        |        |      |       |
| ATOM | 3073 | N  | SER | A | 98  | 57.841 | 43.016 | 61.762 | 1.00 | 18.29 |
| N    |      |    |     |   |     |        |        |        |      |       |
| ATOM | 3074 | CA | SER | A | 98  | 56.449 | 42.698 | 62.067 | 1.00 | 18.29 |
| C    |      |    |     |   |     |        |        |        |      |       |
| ATOM | 3075 | C  | SER | A | 98  | 55.534 | 43.856 | 61.684 | 1.00 | 18.29 |
| C    |      |    |     |   |     |        |        |        |      |       |
| ATOM | 3076 | O  | SER | A | 98  | 55.981 | 44.985 | 61.493 | 1.00 | 18.29 |
| O    |      |    |     |   |     |        |        |        |      |       |
| ATOM | 3077 | CB | SER | A | 98  | 56.268 | 42.365 | 63.549 | 1.00 | 18.29 |
| C    |      |    |     |   |     |        |        |        |      |       |
| ATOM | 3078 | OG | SER | A | 98  | 56.654 | 43.450 | 64.362 | 1.00 | 18.29 |
| O    |      |    |     |   |     |        |        |        |      |       |
| ATOM | 3079 | N  | SER | A | 99  | 54.240 | 43.555 | 61.558 | 1.00 | 19.21 |
| N    |      |    |     |   |     |        |        |        |      |       |
| ATOM | 3080 | CA | SER | A | 99  | 53.239 | 44.576 | 61.263 | 1.00 | 19.21 |
| C    |      |    |     |   |     |        |        |        |      |       |
| ATOM | 3081 | C  | SER | A | 99  | 51.890 | 44.186 | 61.855 | 1.00 | 19.21 |
| C    |      |    |     |   |     |        |        |        |      |       |
| ATOM | 3082 | O  | SER | A | 99  | 51.530 | 43.010 | 61.905 | 1.00 | 19.21 |
| O    |      |    |     |   |     |        |        |        |      |       |
| ATOM | 3083 | CB | SER | A | 99  | 53.091 | 44.816 | 59.754 | 1.00 | 19.21 |
| C    |      |    |     |   |     |        |        |        |      |       |
| ATOM | 3084 | OG | SER | A | 99  | 52.770 | 43.626 | 59.066 | 1.00 | 19.21 |
| O    |      |    |     |   |     |        |        |        |      |       |
| ATOM | 3085 | N  | SER | A | 100 | 51.133 | 45.195 | 62.280 | 1.00 | 22.37 |
| N    |      |    |     |   |     |        |        |        |      |       |
| ATOM | 3086 | CA | SER | A | 100 | 49.809 | 45.001 | 62.861 | 1.00 | 22.37 |
| C    |      |    |     |   |     |        |        |        |      |       |
| ATOM | 3087 | C  | SER | A | 100 | 48.737 | 45.361 | 61.840 | 1.00 | 22.37 |
| C    |      |    |     |   |     |        |        |        |      |       |
| ATOM | 3088 | O  | SER | A | 100 | 48.802 | 46.422 | 61.218 | 1.00 | 22.37 |
| O    |      |    |     |   |     |        |        |        |      |       |
| ATOM | 3089 | CB | SER | A | 100 | 49.639 | 45.851 | 64.122 | 1.00 | 22.37 |
| C    |      |    |     |   |     |        |        |        |      |       |
| ATOM | 3090 | OG | SER | A | 100 | 48.370 | 45.635 | 64.702 | 1.00 | 22.37 |
| O    |      |    |     |   |     |        |        |        |      |       |
| ATOM | 3091 | N  | GLY | A | 101 | 47.760 | 44.477 | 61.668 | 1.00 | 22.20 |
| N    |      |    |     |   |     |        |        |        |      |       |
| ATOM | 3092 | CA | GLY | A | 101 | 46.704 | 44.714 | 60.697 | 1.00 | 22.20 |
| C    |      |    |     |   |     |        |        |        |      |       |
| ATOM | 3093 | C  | GLY | A | 101 | 47.177 | 44.748 | 59.261 | 1.00 | 22.20 |

|      |      |     |           |        |        |        |      |       |  |
|------|------|-----|-----------|--------|--------|--------|------|-------|--|
| C    |      |     |           |        |        |        |      |       |  |
| ATOM | 3094 | O   | GLY A 101 | 46.541 | 45.390 | 58.422 | 1.00 | 22.20 |  |
| O    |      |     |           |        |        |        |      |       |  |
| ATOM | 3095 | N   | PHE A 102 | 48.284 | 44.070 | 58.961 | 1.00 | 19.83 |  |
| N    |      |     |           |        |        |        |      |       |  |
| ATOM | 3096 | CA  | PHE A 102 | 48.964 | 44.068 | 57.666 | 1.00 | 19.83 |  |
| C    |      |     |           |        |        |        |      |       |  |
| ATOM | 3097 | C   | PHE A 102 | 49.500 | 45.435 | 57.275 | 1.00 | 19.83 |  |
| C    |      |     |           |        |        |        |      |       |  |
| ATOM | 3098 | O   | PHE A 102 | 49.954 | 45.613 | 56.145 | 1.00 | 19.83 |  |
| O    |      |     |           |        |        |        |      |       |  |
| ATOM | 3099 | CB  | PHE A 102 | 48.067 | 43.541 | 56.539 | 1.00 | 19.83 |  |
| C    |      |     |           |        |        |        |      |       |  |
| ATOM | 3100 | CG  | PHE A 102 | 47.617 | 42.132 | 56.732 | 1.00 | 19.83 |  |
| C    |      |     |           |        |        |        |      |       |  |
| ATOM | 3101 | CD1 | PHE A 102 | 48.533 | 41.119 | 56.913 | 1.00 | 19.83 |  |
| C    |      |     |           |        |        |        |      |       |  |
| ATOM | 3102 | CD2 | PHE A 102 | 46.276 | 41.817 | 56.714 | 1.00 | 19.83 |  |
| C    |      |     |           |        |        |        |      |       |  |
| ATOM | 3103 | CE1 | PHE A 102 | 48.119 | 39.823 | 57.087 | 1.00 | 19.83 |  |
| C    |      |     |           |        |        |        |      |       |  |
| ATOM | 3104 | CE2 | PHE A 102 | 45.860 | 40.520 | 56.887 | 1.00 | 19.83 |  |
| C    |      |     |           |        |        |        |      |       |  |
| ATOM | 3105 | CZ  | PHE A 102 | 46.782 | 39.522 | 57.074 | 1.00 | 19.83 |  |
| C    |      |     |           |        |        |        |      |       |  |
| ATOM | 3106 | N   | LEU A 103 | 49.470 | 46.406 | 58.175 | 1.00 | 21.21 |  |
| N    |      |     |           |        |        |        |      |       |  |
| ATOM | 3107 | CA  | LEU A 103 | 49.796 | 47.782 | 57.841 | 1.00 | 21.21 |  |
| C    |      |     |           |        |        |        |      |       |  |
| ATOM | 3108 | C   | LEU A 103 | 51.161 | 48.136 | 58.403 | 1.00 | 21.21 |  |
| C    |      |     |           |        |        |        |      |       |  |
| ATOM | 3109 | O   | LEU A 103 | 51.436 | 47.890 | 59.580 | 1.00 | 21.21 |  |
| O    |      |     |           |        |        |        |      |       |  |
| ATOM | 3110 | CB  | LEU A 103 | 48.736 | 48.742 | 58.379 | 1.00 | 21.21 |  |
| C    |      |     |           |        |        |        |      |       |  |
| ATOM | 3111 | CG  | LEU A 103 | 49.050 | 50.225 | 58.177 | 1.00 | 21.21 |  |
| C    |      |     |           |        |        |        |      |       |  |
| ATOM | 3112 | CD1 | LEU A 103 | 49.339 | 50.516 | 56.716 | 1.00 | 21.21 |  |
| C    |      |     |           |        |        |        |      |       |  |
| ATOM | 3113 | CD2 | LEU A 103 | 47.907 | 51.071 | 58.676 | 1.00 | 21.21 |  |
| C    |      |     |           |        |        |        |      |       |  |
| ATOM | 3114 | N   | PHE A 104 | 52.006 | 48.713 | 57.560 | 1.00 | 24.72 |  |
| N    |      |     |           |        |        |        |      |       |  |
| ATOM | 3115 | CA  | PHE A 104 | 53.325 | 49.147 | 57.992 | 1.00 | 24.72 |  |
| C    |      |     |           |        |        |        |      |       |  |
| ATOM | 3116 | C   | PHE A 104 | 53.191 | 50.308 | 58.969 | 1.00 | 24.72 |  |
| C    |      |     |           |        |        |        |      |       |  |
| ATOM | 3117 | O   | PHE A 104 | 52.694 | 51.378 | 58.606 | 1.00 | 24.72 |  |
| O    |      |     |           |        |        |        |      |       |  |
| ATOM | 3118 | CB  | PHE A 104 | 54.168 | 49.556 | 56.786 | 1.00 | 24.72 |  |

|      |      |     |     |   |     |        |        |        |            |
|------|------|-----|-----|---|-----|--------|--------|--------|------------|
| C    |      |     |     |   |     |        |        |        |            |
| ATOM | 3119 | CG  | PHE | A | 104 | 55.439 | 50.243 | 57.158 | 1.00 24.72 |
| C    |      |     |     |   |     |        |        |        |            |
| ATOM | 3120 | CD1 | PHE | A | 104 | 56.396 | 49.582 | 57.894 | 1.00 24.72 |
| C    |      |     |     |   |     |        |        |        |            |
| ATOM | 3121 | CD2 | PHE | A | 104 | 55.661 | 51.558 | 56.804 | 1.00 24.72 |
| C    |      |     |     |   |     |        |        |        |            |
| ATOM | 3122 | CE1 | PHE | A | 104 | 57.549 | 50.211 | 58.258 | 1.00 24.72 |
| C    |      |     |     |   |     |        |        |        |            |
| ATOM | 3123 | CE2 | PHE | A | 104 | 56.812 | 52.190 | 57.167 | 1.00 24.72 |
| C    |      |     |     |   |     |        |        |        |            |
| ATOM | 3124 | CZ  | PHE | A | 104 | 57.758 | 51.520 | 57.894 | 1.00 24.72 |
| C    |      |     |     |   |     |        |        |        |            |
| ATOM | 3125 | N   | HIS | A | 105 | 53.572 | 50.081 | 60.217 | 1.00 34.66 |
| N    |      |     |     |   |     |        |        |        |            |
| ATOM | 3126 | CA  | HIS | A | 105 | 53.597 | 51.168 | 61.187 | 1.00 34.66 |
| C    |      |     |     |   |     |        |        |        |            |
| ATOM | 3127 | C   | HIS | A | 105 | 54.741 | 51.083 | 62.187 | 1.00 34.66 |
| C    |      |     |     |   |     |        |        |        |            |
| ATOM | 3128 | O   | HIS | A | 105 | 54.823 | 51.952 | 63.058 | 1.00 34.66 |
| O    |      |     |     |   |     |        |        |        |            |
| ATOM | 3129 | CB  | HIS | A | 105 | 52.262 | 51.215 | 61.942 | 1.00 34.66 |
| C    |      |     |     |   |     |        |        |        |            |
| ATOM | 3130 | CG  | HIS | A | 105 | 52.100 | 50.110 | 62.937 | 1.00 34.66 |
| C    |      |     |     |   |     |        |        |        |            |
| ATOM | 3131 | ND1 | HIS | A | 105 | 51.854 | 50.343 | 64.273 | 1.00 34.66 |
| N    |      |     |     |   |     |        |        |        |            |
| ATOM | 3132 | CD2 | HIS | A | 105 | 52.163 | 48.765 | 62.795 | 1.00 34.66 |
| C    |      |     |     |   |     |        |        |        |            |
| ATOM | 3133 | CE1 | HIS | A | 105 | 51.767 | 49.189 | 64.909 | 1.00 34.66 |
| C    |      |     |     |   |     |        |        |        |            |
| ATOM | 3134 | NE2 | HIS | A | 105 | 51.950 | 48.216 | 64.036 | 1.00 34.66 |
| N    |      |     |     |   |     |        |        |        |            |
| ATOM | 3135 | N   | SER | A | 106 | 55.624 | 50.097 | 62.099 | 1.00 41.24 |
| N    |      |     |     |   |     |        |        |        |            |
| ATOM | 3136 | CA  | SER | A | 106 | 56.598 | 49.826 | 63.148 | 1.00 41.24 |
| C    |      |     |     |   |     |        |        |        |            |
| ATOM | 3137 | C   | SER | A | 106 | 57.977 | 50.326 | 62.744 | 1.00 41.24 |
| C    |      |     |     |   |     |        |        |        |            |
| ATOM | 3138 | O   | SER | A | 106 | 58.352 | 50.257 | 61.570 | 1.00 41.24 |
| O    |      |     |     |   |     |        |        |        |            |
| ATOM | 3139 | CB  | SER | A | 106 | 56.658 | 48.327 | 63.446 | 1.00 41.24 |
| C    |      |     |     |   |     |        |        |        |            |
| ATOM | 3140 | OG  | SER | A | 106 | 57.305 | 48.079 | 64.680 | 1.00 41.24 |
| O    |      |     |     |   |     |        |        |        |            |
| ATOM | 3141 | N   | ASP | A | 107 | 58.731 | 50.846 | 63.714 | 1.00 47.45 |
| N    |      |     |     |   |     |        |        |        |            |
| ATOM | 3142 | CA  | ASP | A | 107 | 60.101 | 51.211 | 63.387 | 1.00 47.45 |
| C    |      |     |     |   |     |        |        |        |            |
| ATOM | 3143 | C   | ASP | A | 107 | 61.101 | 50.124 | 63.763 | 1.00 47.45 |



|      |      |     |     |   |     |        |        |        |            |
|------|------|-----|-----|---|-----|--------|--------|--------|------------|
| C    |      |     |     |   |     |        |        |        |            |
| ATOM | 3144 | O   | ASP | A | 107 | 61.552 | 49.379 | 62.887 | 1.00 47.45 |
| O    |      |     |     |   |     |        |        |        |            |
| ATOM | 3145 | CB  | ASP | A | 107 | 60.458 | 52.508 | 64.111 | 1.00 47.45 |
| C    |      |     |     |   |     |        |        |        |            |
| ATOM | 3146 | CG  | ASP | A | 107 | 59.889 | 52.555 | 65.520 | 1.00 47.45 |
| C    |      |     |     |   |     |        |        |        |            |
| ATOM | 3147 | OD1 | ASP | A | 107 | 60.330 | 51.747 | 66.366 | 1.00 47.45 |
| O    |      |     |     |   |     |        |        |        |            |
| ATOM | 3148 | OD2 | ASP | A | 107 | 58.999 | 53.392 | 65.779 | 1.00 47.45 |
| O    |      |     |     |   |     |        |        |        |            |
| ATOM | 3149 | N   | PHE | A | 108 | 61.451 | 50.032 | 65.051 | 1.00 44.35 |
| N    |      |     |     |   |     |        |        |        |            |
| ATOM | 3150 | CA  | PHE | A | 108 | 62.131 | 48.903 | 65.688 | 1.00 44.35 |
| C    |      |     |     |   |     |        |        |        |            |
| ATOM | 3151 | C   | PHE | A | 108 | 62.959 | 48.039 | 64.745 | 1.00 44.35 |
| C    |      |     |     |   |     |        |        |        |            |
| ATOM | 3152 | O   | PHE | A | 108 | 62.659 | 46.855 | 64.578 | 1.00 44.35 |
| O    |      |     |     |   |     |        |        |        |            |
| ATOM | 3153 | CB  | PHE | A | 108 | 61.188 | 47.994 | 66.470 | 1.00 44.35 |
| C    |      |     |     |   |     |        |        |        |            |
| ATOM | 3154 | CG  | PHE | A | 108 | 61.931 | 46.966 | 67.279 | 1.00 44.35 |
| C    |      |     |     |   |     |        |        |        |            |
| ATOM | 3155 | CD1 | PHE | A | 108 | 61.793 | 45.614 | 67.023 | 1.00 44.35 |
| C    |      |     |     |   |     |        |        |        |            |
| ATOM | 3156 | CD2 | PHE | A | 108 | 62.844 | 47.365 | 68.234 | 1.00 44.35 |
| C    |      |     |     |   |     |        |        |        |            |
| ATOM | 3157 | CE1 | PHE | A | 108 | 62.516 | 44.685 | 67.741 | 1.00 44.35 |
| C    |      |     |     |   |     |        |        |        |            |
| ATOM | 3158 | CE2 | PHE | A | 108 | 63.562 | 46.437 | 68.955 | 1.00 44.35 |
| C    |      |     |     |   |     |        |        |        |            |
| ATOM | 3159 | CZ  | PHE | A | 108 | 63.398 | 45.099 | 68.707 | 1.00 44.35 |
| C    |      |     |     |   |     |        |        |        |            |
| ATOM | 3160 | N   | TRP | A | 109 | 63.959 | 48.584 | 64.079 | 1.00 35.59 |
| N    |      |     |     |   |     |        |        |        |            |
| ATOM | 3161 | CA  | TRP | A | 109 | 64.770 | 47.716 | 63.245 | 1.00 35.59 |
| C    |      |     |     |   |     |        |        |        |            |
| ATOM | 3162 | C   | TRP | A | 109 | 65.694 | 46.884 | 64.122 | 1.00 35.59 |
| C    |      |     |     |   |     |        |        |        |            |
| ATOM | 3163 | O   | TRP | A | 109 | 66.381 | 47.416 | 64.997 | 1.00 35.59 |
| O    |      |     |     |   |     |        |        |        |            |
| ATOM | 3164 | CB  | TRP | A | 109 | 65.560 | 48.516 | 62.222 | 1.00 35.59 |
| C    |      |     |     |   |     |        |        |        |            |
| ATOM | 3165 | CG  | TRP | A | 109 | 65.680 | 47.764 | 60.963 | 1.00 35.59 |
| C    |      |     |     |   |     |        |        |        |            |
| ATOM | 3166 | CD1 | TRP | A | 109 | 66.509 | 46.716 | 60.716 | 1.00 35.59 |
| C    |      |     |     |   |     |        |        |        |            |
| ATOM | 3167 | CD2 | TRP | A | 109 | 64.910 | 47.958 | 59.776 | 1.00 35.59 |
| C    |      |     |     |   |     |        |        |        |            |
| ATOM | 3168 | NE1 | TRP | A | 109 | 66.323 | 46.260 | 59.438 | 1.00 35.59 |

|      |      |     |     |   |     |        |        |        |            |
|------|------|-----|-----|---|-----|--------|--------|--------|------------|
| N    |      |     |     |   |     |        |        |        |            |
| ATOM | 3169 | CE2 | TRP | A | 109 | 65.345 | 47.006 | 58.839 | 1.00 35.59 |
| C    |      |     |     |   |     |        |        |        |            |
| ATOM | 3170 | CE3 | TRP | A | 109 | 63.906 | 48.854 | 59.408 | 1.00 35.59 |
| C    |      |     |     |   |     |        |        |        |            |
| ATOM | 3171 | CZ2 | TRP | A | 109 | 64.812 | 46.923 | 57.559 | 1.00 35.59 |
| C    |      |     |     |   |     |        |        |        |            |
| ATOM | 3172 | CZ3 | TRP | A | 109 | 63.378 | 48.771 | 58.139 | 1.00 35.59 |
| C    |      |     |     |   |     |        |        |        |            |
| ATOM | 3173 | CH2 | TRP | A | 109 | 63.832 | 47.813 | 57.228 | 1.00 35.59 |
| C    |      |     |     |   |     |        |        |        |            |
| ATOM | 3174 | N   | GLY | A | 110 | 65.701 | 45.576 | 63.890 | 1.00 36.22 |
| N    |      |     |     |   |     |        |        |        |            |
| ATOM | 3175 | CA  | GLY | A | 110 | 66.450 | 44.648 | 64.709 | 1.00 36.22 |
| C    |      |     |     |   |     |        |        |        |            |
| ATOM | 3176 | C   | GLY | A | 110 | 67.921 | 44.608 | 64.355 | 1.00 36.22 |
| C    |      |     |     |   |     |        |        |        |            |
| ATOM | 3177 | O   | GLY | A | 110 | 68.464 | 45.505 | 63.706 | 1.00 36.22 |
| O    |      |     |     |   |     |        |        |        |            |
| ATOM | 3178 | N   | GLN | A | 111 | 68.576 | 43.540 | 64.800 | 1.00 37.43 |
| N    |      |     |     |   |     |        |        |        |            |
| ATOM | 3179 | CA  | GLN | A | 111 | 70.011 | 43.393 | 64.604 | 1.00 37.43 |
| C    |      |     |     |   |     |        |        |        |            |
| ATOM | 3180 | C   | GLN | A | 111 | 70.360 | 42.739 | 63.274 | 1.00 37.43 |
| C    |      |     |     |   |     |        |        |        |            |
| ATOM | 3181 | O   | GLN | A | 111 | 71.284 | 43.189 | 62.591 | 1.00 37.43 |
| O    |      |     |     |   |     |        |        |        |            |
| ATOM | 3182 | CB  | GLN | A | 111 | 70.615 | 42.582 | 65.753 | 1.00 37.43 |
| C    |      |     |     |   |     |        |        |        |            |
| ATOM | 3183 | CG  | GLN | A | 111 | 70.686 | 43.334 | 67.073 | 1.00 37.43 |
| C    |      |     |     |   |     |        |        |        |            |
| ATOM | 3184 | CD  | GLN | A | 111 | 71.294 | 44.714 | 66.930 | 1.00 37.43 |
| C    |      |     |     |   |     |        |        |        |            |
| ATOM | 3185 | OE1 | GLN | A | 111 | 70.772 | 45.691 | 67.462 | 1.00 37.43 |
| O    |      |     |     |   |     |        |        |        |            |
| ATOM | 3186 | NE2 | GLN | A | 111 | 72.415 | 44.798 | 66.226 | 1.00 37.43 |
| N    |      |     |     |   |     |        |        |        |            |
| ATOM | 3187 | N   | GLY | A | 112 | 69.647 | 41.688 | 62.896 | 1.00 30.54 |
| N    |      |     |     |   |     |        |        |        |            |
| ATOM | 3188 | CA  | GLY | A | 112 | 69.927 | 40.972 | 61.672 | 1.00 30.54 |
| C    |      |     |     |   |     |        |        |        |            |
| ATOM | 3189 | C   | GLY | A | 112 | 70.912 | 39.836 | 61.878 | 1.00 30.54 |
| C    |      |     |     |   |     |        |        |        |            |
| ATOM | 3190 | O   | GLY | A | 112 | 71.676 | 39.797 | 62.839 | 1.00 30.54 |
| O    |      |     |     |   |     |        |        |        |            |
| ATOM | 3191 | N   | THR | A | 113 | 70.878 | 38.886 | 60.954 | 1.00 26.36 |
| N    |      |     |     |   |     |        |        |        |            |
| ATOM | 3192 | CA  | THR | A | 113 | 71.802 | 37.764 | 60.965 | 1.00 26.36 |
| C    |      |     |     |   |     |        |        |        |            |
| ATOM | 3193 | C   | THR | A | 113 | 72.374 | 37.581 | 59.568 | 1.00 26.36 |

|      |      |     |     |   |     |        |        |        |            |
|------|------|-----|-----|---|-----|--------|--------|--------|------------|
| C    |      |     |     |   |     |        |        |        |            |
| ATOM | 3194 | O   | THR | A | 113 | 71.663 | 37.719 | 58.573 | 1.00 26.36 |
| O    |      |     |     |   |     |        |        |        |            |
| ATOM | 3195 | CB  | THR | A | 113 | 71.122 | 36.470 | 61.467 | 1.00 26.36 |
| C    |      |     |     |   |     |        |        |        |            |
| ATOM | 3196 | OG1 | THR | A | 113 | 72.107 | 35.450 | 61.658 | 1.00 26.36 |
| O    |      |     |     |   |     |        |        |        |            |
| ATOM | 3197 | CG2 | THR | A | 113 | 70.073 | 35.968 | 60.497 | 1.00 26.36 |
| C    |      |     |     |   |     |        |        |        |            |
| ATOM | 3198 | N   | LEU | A | 114 | 73.670 | 37.295 | 59.497 | 1.00 27.96 |
| N    |      |     |     |   |     |        |        |        |            |
| ATOM | 3199 | CA  | LEU | A | 114 | 74.384 | 37.257 | 58.230 | 1.00 27.96 |
| C    |      |     |     |   |     |        |        |        |            |
| ATOM | 3200 | C   | LEU | A | 114 | 74.391 | 35.844 | 57.663 | 1.00 27.96 |
| C    |      |     |     |   |     |        |        |        |            |
| ATOM | 3201 | O   | LEU | A | 114 | 74.705 | 34.887 | 58.374 | 1.00 27.96 |
| O    |      |     |     |   |     |        |        |        |            |
| ATOM | 3202 | CB  | LEU | A | 114 | 75.816 | 37.763 | 58.420 | 1.00 27.96 |
| C    |      |     |     |   |     |        |        |        |            |
| ATOM | 3203 | CG  | LEU | A | 114 | 76.775 | 37.641 | 57.238 | 1.00 27.96 |
| C    |      |     |     |   |     |        |        |        |            |
| ATOM | 3204 | CD1 | LEU | A | 114 | 76.331 | 38.529 | 56.103 | 1.00 27.96 |
| C    |      |     |     |   |     |        |        |        |            |
| ATOM | 3205 | CD2 | LEU | A | 114 | 78.192 | 37.993 | 57.674 | 1.00 27.96 |
| C    |      |     |     |   |     |        |        |        |            |
| ATOM | 3206 | N   | VAL | A | 115 | 74.050 | 35.717 | 56.385 | 1.00 30.11 |
| N    |      |     |     |   |     |        |        |        |            |
| ATOM | 3207 | CA  | VAL | A | 115 | 74.110 | 34.457 | 55.658 | 1.00 30.11 |
| C    |      |     |     |   |     |        |        |        |            |
| ATOM | 3208 | C   | VAL | A | 115 | 75.127 | 34.629 | 54.540 | 1.00 30.11 |
| C    |      |     |     |   |     |        |        |        |            |
| ATOM | 3209 | O   | VAL | A | 115 | 74.984 | 35.526 | 53.700 | 1.00 30.11 |
| O    |      |     |     |   |     |        |        |        |            |
| ATOM | 3210 | CB  | VAL | A | 115 | 72.737 | 34.061 | 55.090 | 1.00 30.11 |
| C    |      |     |     |   |     |        |        |        |            |
| ATOM | 3211 | CG1 | VAL | A | 115 | 72.862 | 32.866 | 54.171 | 1.00 30.11 |
| C    |      |     |     |   |     |        |        |        |            |
| ATOM | 3212 | CG2 | VAL | A | 115 | 71.761 | 33.781 | 56.211 | 1.00 30.11 |
| C    |      |     |     |   |     |        |        |        |            |
| ATOM | 3213 | N   | THR | A | 116 | 76.148 | 33.774 | 54.524 | 1.00 37.66 |
| N    |      |     |     |   |     |        |        |        |            |
| ATOM | 3214 | CA  | THR | A | 116 | 77.231 | 33.861 | 53.552 | 1.00 37.66 |
| C    |      |     |     |   |     |        |        |        |            |
| ATOM | 3215 | C   | THR | A | 116 | 77.362 | 32.545 | 52.804 | 1.00 37.66 |
| C    |      |     |     |   |     |        |        |        |            |
| ATOM | 3216 | O   | THR | A | 116 | 77.530 | 31.490 | 53.421 | 1.00 37.66 |
| O    |      |     |     |   |     |        |        |        |            |
| ATOM | 3217 | CB  | THR | A | 116 | 78.563 | 34.199 | 54.218 | 1.00 37.66 |
| C    |      |     |     |   |     |        |        |        |            |
| ATOM | 3218 | OG1 | THR | A | 116 | 78.357 | 35.158 | 55.258 | 1.00 37.66 |



|           |      |    |     |   |   |        |        |        |      |       |
|-----------|------|----|-----|---|---|--------|--------|--------|------|-------|
| ATOM<br>O | 3244 | 04 | NAG | V | 1 | 41.435 | 33.990 | 49.665 | 1.00 | 34.73 |
| ATOM<br>O | 3245 | 05 | NAG | V | 1 | 42.770 | 37.265 | 50.173 | 1.00 | 34.73 |
| ATOM<br>O | 3246 | 06 | NAG | V | 1 | 43.459 | 36.524 | 52.473 | 1.00 | 34.73 |
| ATOM<br>O | 3247 | 07 | NAG | V | 1 | 41.313 | 38.595 | 44.739 | 1.00 | 34.73 |
| ATOM<br>C | 3248 | C1 | NAG | V | 2 | 42.076 | 32.738 | 49.536 | 1.00 | 49.60 |
| ATOM<br>C | 3249 | C2 | NAG | V | 2 | 41.059 | 31.765 | 50.114 | 1.00 | 49.60 |
| ATOM<br>C | 3250 | C3 | NAG | V | 2 | 41.488 | 30.321 | 49.882 | 1.00 | 49.60 |
| ATOM<br>C | 3251 | C4 | NAG | V | 2 | 41.924 | 30.088 | 48.443 | 1.00 | 49.60 |
| ATOM<br>C | 3252 | C5 | NAG | V | 2 | 42.910 | 31.162 | 48.014 | 1.00 | 49.60 |
| ATOM<br>C | 3253 | C6 | NAG | V | 2 | 43.293 | 31.070 | 46.558 | 1.00 | 49.60 |
| ATOM<br>C | 3254 | C7 | NAG | V | 2 | 39.880 | 32.716 | 52.042 | 1.00 | 49.60 |
| ATOM<br>C | 3255 | C8 | NAG | V | 2 | 39.871 | 32.870 | 53.531 | 1.00 | 49.60 |
| ATOM<br>N | 3256 | N2 | NAG | V | 2 | 40.890 | 32.010 | 51.536 | 1.00 | 49.60 |
| ATOM<br>O | 3257 | 03 | NAG | V | 2 | 40.386 | 29.476 | 50.190 | 1.00 | 49.60 |
| ATOM<br>O | 3258 | 04 | NAG | V | 2 | 42.583 | 28.832 | 48.361 | 1.00 | 49.60 |
| ATOM<br>O | 3259 | 05 | NAG | V | 2 | 42.306 | 32.444 | 48.204 | 1.00 | 49.60 |
| ATOM<br>O | 3260 | 06 | NAG | V | 2 | 42.144 | 31.050 | 45.723 | 1.00 | 49.60 |
| ATOM<br>O | 3261 | 07 | NAG | V | 2 | 39.010 | 33.202 | 51.332 | 1.00 | 49.60 |
| ATOM<br>C | 3262 | C1 | BMA | V | 3 | 41.744 | 27.896 | 47.668 | 1.00 | 79.42 |
| ATOM<br>C | 3263 | C2 | BMA | V | 3 | 42.688 | 26.895 | 46.992 | 1.00 | 79.42 |
| ATOM<br>C | 3264 | C3 | BMA | V | 3 | 41.875 | 25.797 | 46.333 | 1.00 | 79.42 |
| ATOM<br>C | 3265 | C4 | BMA | V | 3 | 40.885 | 25.177 | 47.335 | 1.00 | 79.42 |
| ATOM<br>C | 3266 | C5 | BMA | V | 3 | 40.007 | 26.288 | 47.939 | 1.00 | 79.42 |
| ATOM<br>C | 3267 | C6 | BMA | V | 3 | 39.015 | 25.790 | 48.974 | 1.00 | 79.42 |
| ATOM<br>O | 3268 | 02 | BMA | V | 3 | 43.504 | 26.268 | 47.964 | 1.00 | 79.42 |

|           |      |    |     |   |   |        |        |        |      |       |
|-----------|------|----|-----|---|---|--------|--------|--------|------|-------|
| ATOM<br>O | 3269 | 03 | BMA | V | 3 | 42.718 | 24.799 | 45.741 | 1.00 | 79.42 |
| ATOM<br>O | 3270 | 04 | BMA | V | 3 | 40.063 | 24.241 | 46.675 | 1.00 | 79.42 |
| ATOM<br>O | 3271 | 05 | BMA | V | 3 | 40.865 | 27.247 | 48.568 | 1.00 | 79.42 |
| ATOM<br>O | 3272 | 06 | BMA | V | 3 | 39.736 | 25.228 | 50.070 | 1.00 | 79.42 |
| ATOM<br>C | 3273 | C1 | FUC | V | 4 | 42.760 | 37.334 | 53.466 | 1.00 | 36.66 |
| ATOM<br>C | 3274 | C2 | FUC | V | 4 | 41.205 | 37.071 | 53.587 | 1.00 | 36.66 |
| ATOM<br>C | 3275 | C3 | FUC | V | 4 | 40.591 | 38.199 | 54.411 | 1.00 | 36.66 |
| ATOM<br>C | 3276 | C4 | FUC | V | 4 | 41.562 | 38.688 | 55.516 | 1.00 | 36.66 |
| ATOM<br>C | 3277 | C5 | FUC | V | 4 | 42.562 | 37.572 | 55.896 | 1.00 | 36.66 |
| ATOM<br>C | 3278 | C6 | FUC | V | 4 | 43.535 | 37.975 | 56.985 | 1.00 | 36.66 |
| ATOM<br>O | 3279 | 02 | FUC | V | 4 | 40.862 | 35.812 | 54.129 | 1.00 | 36.66 |
| ATOM<br>O | 3280 | 03 | FUC | V | 4 | 40.327 | 39.303 | 53.574 | 1.00 | 36.66 |
| ATOM<br>O | 3281 | 04 | FUC | V | 4 | 42.260 | 39.848 | 55.096 | 1.00 | 36.66 |
| ATOM<br>O | 3282 | 05 | FUC | V | 4 | 43.353 | 37.127 | 54.766 | 1.00 | 36.66 |
| ATOM<br>C | 3283 | C1 | BMA | V | 5 | 39.108 | 25.572 | 51.327 | 1.00 | 80.56 |
| ATOM<br>C | 3284 | C2 | BMA | V | 5 | 37.595 | 25.230 | 51.269 | 1.00 | 80.56 |
| ATOM<br>C | 3285 | C3 | BMA | V | 5 | 36.953 | 25.485 | 52.630 | 1.00 | 80.56 |
| ATOM<br>C | 3286 | C4 | BMA | V | 5 | 37.739 | 24.807 | 53.761 | 1.00 | 80.56 |
| ATOM<br>C | 3287 | C5 | BMA | V | 5 | 39.219 | 25.215 | 53.697 | 1.00 | 80.56 |
| ATOM<br>C | 3288 | C6 | BMA | V | 5 | 40.063 | 24.506 | 54.738 | 1.00 | 80.56 |
| ATOM<br>O | 3289 | 02 | BMA | V | 5 | 37.401 | 23.855 | 50.987 | 1.00 | 80.56 |
| ATOM<br>O | 3290 | 03 | BMA | V | 5 | 35.600 | 25.049 | 52.653 | 1.00 | 80.56 |
| ATOM<br>O | 3291 | 04 | BMA | V | 5 | 37.200 | 25.185 | 55.019 | 1.00 | 80.56 |
| ATOM<br>O | 3292 | 05 | BMA | V | 5 | 39.733 | 24.874 | 52.399 | 1.00 | 80.56 |
| ATOM<br>O | 3293 | 06 | BMA | V | 5 | 39.428 | 24.659 | 56.002 | 1.00 | 80.56 |



ATOM 3319 07 NAG V 9 45.899 19.466 43.524 1.00109.04  
0  
END
