# Supplementary material for: Identification and mechanistic basis of non-ACE2 blocking neutralizing antibodies from COVID-19 patients with deep RNA sequencing and molecular dynamics simulations
Source: PubMed Central journal article supplement (PMC9800910; doi:10.3389/fmolb.2022.1080964), 2022-12-16
Supplement: DataSheet4.pdf [file DataSheet4.pdf]

|           |    |      |       |   |        |        |        |      |      |
|-----------|----|------|-------|---|--------|--------|--------|------|------|
| ATOM<br>N | 1  | N    | GLN X | 1 | 0.000  | 0.000  | 0.000  | 1.00 | 0.00 |
| ATOM<br>H | 2  | HT1  | GLN X | 1 | 0.825  | -0.422 | 0.472  | 1.00 | 0.00 |
| ATOM<br>H | 3  | HT2  | GLN X | 1 | -0.837 | -0.599 | 0.147  | 1.00 | 0.00 |
| ATOM<br>H | 4  | HT3  | GLN X | 1 | -0.217 | 0.945  | 0.374  | 1.00 | 0.00 |
| ATOM<br>C | 5  | CA   | GLN X | 1 | 0.200  | 0.097  | -1.444 | 1.00 | 0.00 |
| ATOM<br>H | 6  | HA   | GLN X | 1 | -0.677 | 0.510  | -1.921 | 1.00 | 0.00 |
| ATOM<br>C | 7  | CB   | GLN X | 1 | 1.301  | 1.230  | -1.745 | 1.00 | 0.00 |
| ATOM<br>H | 8  | HB1  | GLN X | 1 | 1.062  | 2.114  | -1.117 | 1.00 | 0.00 |
| ATOM<br>H | 9  | HB2  | GLN X | 1 | 1.102  | 1.672  | -2.745 | 1.00 | 0.00 |
| ATOM<br>C | 10 | CG   | GLN X | 1 | 2.831  | 0.871  | -1.602 | 1.00 | 0.00 |
| ATOM<br>H | 11 | HG1  | GLN X | 1 | 3.550  | 1.672  | -1.878 | 1.00 | 0.00 |
| ATOM<br>H | 12 | HG2  | GLN X | 1 | 2.990  | -0.048 | -2.206 | 1.00 | 0.00 |
| ATOM<br>C | 13 | CD   | GLN X | 1 | 3.228  | 0.352  | -0.164 | 1.00 | 0.00 |
| ATOM<br>O | 14 | OE1  | GLN X | 1 | 2.757  | -0.615 | 0.309  | 1.00 | 0.00 |
| ATOM<br>N | 15 | NE2  | GLN X | 1 | 4.363  | 0.925  | 0.428  | 1.00 | 0.00 |
| ATOM<br>H | 16 | HE21 | GLN X | 1 | 4.663  | 0.625  | 1.334  | 1.00 | 0.00 |
| ATOM<br>H | 17 | HE22 | GLN X | 1 | 4.623  | 1.858  | 0.178  | 1.00 | 0.00 |
| ATOM<br>C | 18 | C    | GLN X | 1 | 0.511  | -1.150 | -2.183 | 1.00 | 0.00 |
| ATOM<br>O | 19 | O    | GLN X | 1 | 0.858  | -2.197 | -1.587 | 1.00 | 0.00 |
| ATOM<br>N | 20 | N    | VAL X | 2 | 0.440  | -1.093 | -3.522 | 1.00 | 0.00 |
| ATOM<br>H | 21 | HN   | VAL X | 2 | 0.316  | -0.242 | -4.027 | 1.00 | 0.00 |
| ATOM<br>C | 22 | CA   | VAL X | 2 | 0.489  | -2.225 | -4.328 | 1.00 | 0.00 |
| ATOM<br>H | 23 | HA   | VAL X | 2 | 0.438  | -3.210 | -3.888 | 1.00 | 0.00 |
| ATOM<br>C | 24 | CB   | VAL X | 2 | -0.662 | -1.984 | -5.338 | 1.00 | 0.00 |
| ATOM<br>H | 25 | HB   | VAL X | 2 | -0.485 | -1.087 | -5.969 | 1.00 | 0.00 |



|           |    |      |       |   |       |        |        |      |      |
|-----------|----|------|-------|---|-------|--------|--------|------|------|
| ATOM<br>C | 51 | C    | GLN X | 3 | 4.167 | -4.873 | -5.518 | 1.00 | 0.00 |
| ATOM<br>O | 52 | O    | GLN X | 3 | 3.484 | -5.529 | -4.710 | 1.00 | 0.00 |
| ATOM<br>N | 53 | N    | LEU X | 4 | 4.947 | -5.394 | -6.448 | 1.00 | 0.00 |
| ATOM<br>H | 54 | HN   | LEU X | 4 | 5.385 | -4.826 | -7.141 | 1.00 | 0.00 |
| ATOM<br>C | 55 | CA   | LEU X | 4 | 5.159 | -6.856 | -6.531 | 1.00 | 0.00 |
| ATOM<br>H | 56 | HA   | LEU X | 4 | 4.762 | -7.412 | -5.694 | 1.00 | 0.00 |
| ATOM<br>C | 57 | CB   | LEU X | 4 | 4.547 | -7.454 | -7.859 | 1.00 | 0.00 |
| ATOM<br>H | 58 | HB1  | LEU X | 4 | 4.878 | -8.511 | -7.932 | 1.00 | 0.00 |
| ATOM<br>H | 59 | HB2  | LEU X | 4 | 5.052 | -6.966 | -8.720 | 1.00 | 0.00 |
| ATOM<br>C | 60 | CG   | LEU X | 4 | 3.006 | -7.453 | -7.918 | 1.00 | 0.00 |
| ATOM<br>H | 61 | HG   | LEU X | 4 | 2.647 | -7.529 | -6.869 | 1.00 | 0.00 |
| ATOM<br>C | 62 | CD1  | LEU X | 4 | 2.429 | -6.147 | -8.580 | 1.00 | 0.00 |
| ATOM<br>H | 63 | HD11 | LEU X | 4 | 2.808 | -6.023 | -9.617 | 1.00 | 0.00 |
| ATOM<br>H | 64 | HD12 | LEU X | 4 | 2.771 | -5.253 | -8.015 | 1.00 | 0.00 |
| ATOM<br>H | 65 | HD13 | LEU X | 4 | 1.320 | -6.135 | -8.649 | 1.00 | 0.00 |
| ATOM<br>C | 66 | CD2  | LEU X | 4 | 2.493 | -8.601 | -8.758 | 1.00 | 0.00 |
| ATOM<br>H | 67 | HD21 | LEU X | 4 | 1.382 | -8.602 | -8.733 | 1.00 | 0.00 |
| ATOM<br>H | 68 | HD22 | LEU X | 4 | 2.779 | -9.562 | -8.280 | 1.00 | 0.00 |
| ATOM<br>H | 69 | HD23 | LEU X | 4 | 2.771 | -8.501 | -9.829 | 1.00 | 0.00 |
| ATOM<br>C | 70 | C    | LEU X | 4 | 6.647 | -7.152 | -6.611 | 1.00 | 0.00 |
| ATOM<br>O | 71 | O    | LEU X | 4 | 7.549 | -6.352 | -6.800 | 1.00 | 0.00 |
| ATOM<br>N | 72 | N    | VAL X | 5 | 6.924 | -8.440 | -6.146 | 1.00 | 0.00 |
| ATOM<br>H | 73 | HN   | VAL X | 5 | 6.195 | -8.965 | -5.713 | 1.00 | 0.00 |
| ATOM<br>C | 74 | CA   | VAL X | 5 | 8.294 | -8.981 | -6.070 | 1.00 | 0.00 |
| ATOM<br>H | 75 | HA   | VAL X | 5 | 9.018 | -8.181 | -6.099 | 1.00 | 0.00 |



|           |     |     |     |   |   |        |         |         |      |      |
|-----------|-----|-----|-----|---|---|--------|---------|---------|------|------|
| ATOM<br>C | 101 | C   | GLU | X | 6 | 10.730 | -11.652 | -9.241  | 1.00 | 0.00 |
| ATOM<br>O | 102 | O   | GLU | X | 6 | 11.581 | -11.729 | -8.414  | 1.00 | 0.00 |
| ATOM<br>N | 103 | N   | SER | X | 7 | 10.472 | -12.671 | -10.121 | 1.00 | 0.00 |
| ATOM<br>H | 104 | HN  | SER | X | 7 | 9.635  | -12.749 | -10.657 | 1.00 | 0.00 |
| ATOM<br>C | 105 | CA  | SER | X | 7 | 11.349 | -13.850 | -10.326 | 1.00 | 0.00 |
| ATOM<br>H | 106 | HA  | SER | X | 7 | 12.334 | -13.552 | -9.997  | 1.00 | 0.00 |
| ATOM<br>C | 107 | CB  | SER | X | 7 | 10.754 | -15.064 | -9.589  | 1.00 | 0.00 |
| ATOM<br>H | 108 | HB1 | SER | X | 7 | 10.005 | -15.570 | -10.234 | 1.00 | 0.00 |
| ATOM<br>H | 109 | HB2 | SER | X | 7 | 10.167 | -14.761 | -8.696  | 1.00 | 0.00 |
| ATOM<br>O | 110 | OG  | SER | X | 7 | 11.742 | -16.001 | -9.275  | 1.00 | 0.00 |
| ATOM<br>H | 111 | HG1 | SER | X | 7 | 12.174 | -15.821 | -8.436  | 1.00 | 0.00 |
| ATOM<br>C | 112 | C   | SER | X | 7 | 11.529 | -14.316 | -11.792 | 1.00 | 0.00 |
| ATOM<br>O | 113 | O   | SER | X | 7 | 10.799 | -13.800 | -12.623 | 1.00 | 0.00 |
| ATOM<br>N | 114 | N   | GLY | X | 8 | 12.447 | -15.216 | -12.069 | 1.00 | 0.00 |
| ATOM<br>H | 115 | HN  | GLY | X | 8 | 12.953 | -15.561 | -11.282 | 1.00 | 0.00 |
| ATOM<br>C | 116 | CA  | GLY | X | 8 | 12.745 | -15.541 | -13.501 | 1.00 | 0.00 |
| ATOM<br>H | 117 | HA1 | GLY | X | 8 | 11.881 | -15.744 | -14.116 | 1.00 | 0.00 |
| ATOM<br>H | 118 | HA2 | GLY | X | 8 | 13.308 | -16.458 | -13.399 | 1.00 | 0.00 |
| ATOM<br>C | 119 | C   | GLY | X | 8 | 13.567 | -14.458 | -14.255 | 1.00 | 0.00 |
| ATOM<br>O | 120 | O   | GLY | X | 8 | 13.925 | -13.417 | -13.683 | 1.00 | 0.00 |
| ATOM<br>N | 121 | N   | GLY | X | 9 | 13.937 | -14.635 | -15.522 | 1.00 | 0.00 |
| ATOM<br>H | 122 | HN  | GLY | X | 9 | 13.740 | -15.423 | -16.101 | 1.00 | 0.00 |
| ATOM<br>C | 123 | CA  | GLY | X | 9 | 14.646 | -13.676 | -16.368 | 1.00 | 0.00 |
| ATOM<br>H | 124 | HA1 | GLY | X | 9 | 14.919 | -12.818 | -15.773 | 1.00 | 0.00 |
| ATOM<br>H | 125 | HA2 | GLY | X | 9 | 14.139 | -13.388 | -17.277 | 1.00 | 0.00 |

|           |     |      |       |    |        |         |         |      |      |
|-----------|-----|------|-------|----|--------|---------|---------|------|------|
| ATOM<br>C | 126 | C    | GLY X | 9  | 15.906 | -14.297 | -16.837 | 1.00 | 0.00 |
| ATOM<br>O | 127 | O    | GLY X | 9  | 16.077 | -15.505 | -16.809 | 1.00 | 0.00 |
| ATOM<br>N | 128 | N    | GLY X | 10 | 16.862 | -13.338 | -17.256 | 1.00 | 0.00 |
| ATOM<br>H | 129 | HN   | GLY X | 10 | 16.397 | -12.457 | -17.300 | 1.00 | 0.00 |
| ATOM<br>C | 130 | CA   | GLY X | 10 | 18.241 | -13.667 | -17.638 | 1.00 | 0.00 |
| ATOM<br>H | 131 | HA1  | GLY X | 10 | 18.647 | -14.214 | -16.800 | 1.00 | 0.00 |
| ATOM<br>H | 132 | HA2  | GLY X | 10 | 18.688 | -12.698 | -17.804 | 1.00 | 0.00 |
| ATOM<br>C | 133 | C    | GLY X | 10 | 18.407 | -14.237 | -19.010 | 1.00 | 0.00 |
| ATOM<br>O | 134 | O    | GLY X | 10 | 17.502 | -14.247 | -19.821 | 1.00 | 0.00 |
| ATOM<br>N | 135 | N    | VAL X | 11 | 19.628 | -14.745 | -19.357 | 1.00 | 0.00 |
| ATOM<br>H | 136 | HN   | VAL X | 11 | 20.330 | -14.706 | -18.651 | 1.00 | 0.00 |
| ATOM<br>C | 137 | CA   | VAL X | 11 | 20.035 | -15.298 | -20.614 | 1.00 | 0.00 |
| ATOM<br>H | 138 | HA   | VAL X | 11 | 19.702 | -14.654 | -21.415 | 1.00 | 0.00 |
| ATOM<br>C | 139 | CB   | VAL X | 11 | 21.559 | -15.490 | -20.488 | 1.00 | 0.00 |
| ATOM<br>H | 140 | HB   | VAL X | 11 | 21.845 | -16.235 | -19.715 | 1.00 | 0.00 |
| ATOM<br>C | 141 | CG1  | VAL X | 11 | 22.119 | -16.120 | -21.726 | 1.00 | 0.00 |
| ATOM<br>H | 142 | HG11 | VAL X | 11 | 23.218 | -16.252 | -21.640 | 1.00 | 0.00 |
| ATOM<br>H | 143 | HG12 | VAL X | 11 | 21.952 | -15.474 | -22.615 | 1.00 | 0.00 |
| ATOM<br>H | 144 | HG13 | VAL X | 11 | 21.620 | -17.097 | -21.900 | 1.00 | 0.00 |
| ATOM<br>C | 145 | CG2  | VAL X | 11 | 22.307 | -14.222 | -20.109 | 1.00 | 0.00 |
| ATOM<br>H | 146 | HG21 | VAL X | 11 | 22.187 | -13.989 | -19.029 | 1.00 | 0.00 |
| ATOM<br>H | 147 | HG22 | VAL X | 11 | 22.061 | -13.322 | -20.712 | 1.00 | 0.00 |
| ATOM<br>H | 148 | HG23 | VAL X | 11 | 23.365 | -14.403 | -20.394 | 1.00 | 0.00 |
| ATOM<br>C | 149 | C    | VAL X | 11 | 19.345 | -16.654 | -20.949 | 1.00 | 0.00 |
| ATOM<br>O | 150 | O    | VAL X | 11 | 19.577 | -17.699 | -20.338 | 1.00 | 0.00 |

|           |     |      |       |    |        |         |         |      |      |
|-----------|-----|------|-------|----|--------|---------|---------|------|------|
| ATOM<br>N | 151 | N    | VAL X | 12 | 18.600 | -16.586 | -22.056 | 1.00 | 0.00 |
| ATOM<br>H | 152 | HN   | VAL X | 12 | 18.523 | -15.717 | -22.539 | 1.00 | 0.00 |
| ATOM<br>C | 153 | CA   | VAL X | 12 | 18.000 | -17.814 | -22.616 | 1.00 | 0.00 |
| ATOM<br>H | 154 | HA   | VAL X | 12 | 18.149 | -18.580 | -21.870 | 1.00 | 0.00 |
| ATOM<br>C | 155 | CB   | VAL X | 12 | 16.505 | -17.584 | -22.830 | 1.00 | 0.00 |
| ATOM<br>H | 156 | HB   | VAL X | 12 | 16.291 | -16.741 | -23.522 | 1.00 | 0.00 |
| ATOM<br>C | 157 | CG1  | VAL X | 12 | 15.941 | -18.806 | -23.541 | 1.00 | 0.00 |
| ATOM<br>H | 158 | HG11 | VAL X | 12 | 16.119 | -18.662 | -24.628 | 1.00 | 0.00 |
| ATOM<br>H | 159 | HG12 | VAL X | 12 | 14.836 | -18.786 | -23.431 | 1.00 | 0.00 |
| ATOM<br>H | 160 | HG13 | VAL X | 12 | 16.386 | -19.749 | -23.156 | 1.00 | 0.00 |
| ATOM<br>C | 161 | CG2  | VAL X | 12 | 15.825 | -17.551 | -21.452 | 1.00 | 0.00 |
| ATOM<br>H | 162 | HG21 | VAL X | 12 | 16.161 | -16.602 | -20.982 | 1.00 | 0.00 |
| ATOM<br>H | 163 | HG22 | VAL X | 12 | 16.157 | -18.460 | -20.906 | 1.00 | 0.00 |
| ATOM<br>H | 164 | HG23 | VAL X | 12 | 14.723 | -17.612 | -21.579 | 1.00 | 0.00 |
| ATOM<br>C | 165 | C    | VAL X | 12 | 18.685 | -18.337 | -23.858 | 1.00 | 0.00 |
| ATOM<br>O | 166 | O    | VAL X | 12 | 18.751 | -17.734 | -24.913 | 1.00 | 0.00 |
| ATOM<br>N | 167 | N    | GLN X | 13 | 19.145 | -19.612 | -23.758 | 1.00 | 0.00 |
| ATOM<br>H | 168 | HN   | GLN X | 13 | 19.037 | -20.141 | -22.919 | 1.00 | 0.00 |
| ATOM<br>C | 169 | CA   | GLN X | 13 | 19.603 | -20.258 | -24.960 | 1.00 | 0.00 |
| ATOM<br>H | 170 | HA   | GLN X | 13 | 20.473 | -19.672 | -25.216 | 1.00 | 0.00 |
| ATOM<br>C | 171 | CB   | GLN X | 13 | 20.179 | -21.752 | -24.747 | 1.00 | 0.00 |
| ATOM<br>H | 172 | HB1  | GLN X | 13 | 20.381 | -22.295 | -25.695 | 1.00 | 0.00 |
| ATOM<br>H | 173 | HB2  | GLN X | 13 | 19.293 | -22.157 | -24.213 | 1.00 | 0.00 |
| ATOM<br>C | 174 | CG   | GLN X | 13 | 21.460 | -21.809 | -23.890 | 1.00 | 0.00 |
| ATOM<br>H | 175 | HG1  | GLN X | 13 | 21.234 | -21.378 | -22.891 | 1.00 | 0.00 |

|           |     |      |     |   |    |        |         |         |      |      |
|-----------|-----|------|-----|---|----|--------|---------|---------|------|------|
| ATOM<br>H | 176 | HG2  | GLN | X | 13 | 22.227 | -21.262 | -24.479 | 1.00 | 0.00 |
| ATOM<br>C | 177 | CD   | GLN | X | 13 | 21.732 | -23.226 | -23.553 | 1.00 | 0.00 |
| ATOM<br>O | 178 | OE1  | GLN | X | 13 | 21.479 | -23.647 | -22.440 | 1.00 | 0.00 |
| ATOM<br>N | 179 | NE2  | GLN | X | 13 | 22.270 | -24.026 | -24.446 | 1.00 | 0.00 |
| ATOM<br>H | 180 | HE21 | GLN | X | 13 | 22.720 | -23.629 | -25.246 | 1.00 | 0.00 |
| ATOM<br>H | 181 | HE22 | GLN | X | 13 | 22.414 | -24.965 | -24.134 | 1.00 | 0.00 |
| ATOM<br>C | 182 | C    | GLN | X | 13 | 18.630 | -20.285 | -26.166 | 1.00 | 0.00 |
| ATOM<br>O | 183 | O    | GLN | X | 13 | 17.402 | -20.537 | -25.898 | 1.00 | 0.00 |
| ATOM<br>N | 184 | N    | PRO | X | 14 | 18.960 | -19.895 | -27.473 | 1.00 | 0.00 |
| ATOM<br>C | 185 | CD   | PRO | X | 14 | 20.040 | -18.957 | -27.772 | 1.00 | 0.00 |
| ATOM<br>H | 186 | HD1  | PRO | X | 14 | 20.957 | -19.445 | -27.380 | 1.00 | 0.00 |
| ATOM<br>H | 187 | HD2  | PRO | X | 14 | 19.881 | -17.975 | -27.277 | 1.00 | 0.00 |
| ATOM<br>C | 188 | CA   | PRO | X | 14 | 18.073 | -19.948 | -28.702 | 1.00 | 0.00 |
| ATOM<br>H | 189 | HA   | PRO | X | 14 | 17.424 | -19.097 | -28.559 | 1.00 | 0.00 |
| ATOM<br>C | 190 | CB   | PRO | X | 14 | 18.981 | -19.734 | -29.897 | 1.00 | 0.00 |
| ATOM<br>H | 191 | HB1  | PRO | X | 14 | 18.510 | -19.511 | -30.878 | 1.00 | 0.00 |
| ATOM<br>H | 192 | HB2  | PRO | X | 14 | 19.669 | -20.598 | -30.015 | 1.00 | 0.00 |
| ATOM<br>C | 193 | CG   | PRO | X | 14 | 20.111 | -18.752 | -29.375 | 1.00 | 0.00 |
| ATOM<br>H | 194 | HG1  | PRO | X | 14 | 21.091 | -18.899 | -29.877 | 1.00 | 0.00 |
| ATOM<br>H | 195 | HG2  | PRO | X | 14 | 19.770 | -17.772 | -29.771 | 1.00 | 0.00 |
| ATOM<br>C | 196 | C    | PRO | X | 14 | 17.197 | -21.157 | -28.831 | 1.00 | 0.00 |
| ATOM<br>O | 197 | O    | PRO | X | 14 | 17.665 | -22.269 | -28.644 | 1.00 | 0.00 |
| ATOM<br>N | 198 | N    | GLY | X | 15 | 15.877 | -20.911 | -29.053 | 1.00 | 0.00 |
| ATOM<br>H | 199 | HN   | GLY | X | 15 | 15.597 | -19.970 | -28.878 | 1.00 | 0.00 |
| ATOM<br>C | 200 | CA   | GLY | X | 15 | 14.825 | -21.878 | -29.173 | 1.00 | 0.00 |



|           |     |      |     |   |    |        |         |         |      |      |
|-----------|-----|------|-----|---|----|--------|---------|---------|------|------|
| ATOM<br>H | 201 | HA1  | GLY | X | 15 | 15.237 | -22.729 | -29.695 | 1.00 | 0.00 |
| ATOM<br>H | 202 | HA2  | GLY | X | 15 | 14.059 | -21.276 | -29.639 | 1.00 | 0.00 |
| ATOM<br>C | 203 | C    | GLY | X | 15 | 14.286 | -22.495 | -27.894 | 1.00 | 0.00 |
| ATOM<br>O | 204 | O    | GLY | X | 15 | 13.723 | -23.578 | -27.898 | 1.00 | 0.00 |
| ATOM<br>N | 205 | N    | ARG | X | 16 | 14.539 | -21.873 | -26.695 | 1.00 | 0.00 |
| ATOM<br>H | 206 | HN   | ARG | X | 16 | 14.990 | -20.984 | -26.711 | 1.00 | 0.00 |
| ATOM<br>C | 207 | CA   | ARG | X | 16 | 14.057 | -22.552 | -25.451 | 1.00 | 0.00 |
| ATOM<br>H | 208 | HA   | ARG | X | 16 | 13.594 | -23.488 | -25.726 | 1.00 | 0.00 |
| ATOM<br>C | 209 | CB   | ARG | X | 16 | 15.260 | -22.881 | -24.400 | 1.00 | 0.00 |
| ATOM<br>H | 210 | HB1  | ARG | X | 16 | 14.856 | -23.112 | -23.391 | 1.00 | 0.00 |
| ATOM<br>H | 211 | HB2  | ARG | X | 16 | 15.936 | -22.000 | -24.401 | 1.00 | 0.00 |
| ATOM<br>C | 212 | CG   | ARG | X | 16 | 16.167 | -24.159 | -24.797 | 1.00 | 0.00 |
| ATOM<br>H | 213 | HG1  | ARG | X | 16 | 15.389 | -24.951 | -24.827 | 1.00 | 0.00 |
| ATOM<br>H | 214 | HG2  | ARG | X | 16 | 16.824 | -24.211 | -23.902 | 1.00 | 0.00 |
| ATOM<br>C | 215 | CD   | ARG | X | 16 | 17.063 | -23.943 | -25.997 | 1.00 | 0.00 |
| ATOM<br>H | 216 | HD1  | ARG | X | 16 | 17.657 | -23.016 | -25.850 | 1.00 | 0.00 |
| ATOM<br>H | 217 | HD2  | ARG | X | 16 | 16.420 | -23.904 | -26.902 | 1.00 | 0.00 |
| ATOM<br>N | 218 | NE   | ARG | X | 16 | 17.920 | -25.141 | -26.124 | 1.00 | 0.00 |
| ATOM<br>H | 219 | HE   | ARG | X | 16 | 17.950 | -25.815 | -25.387 | 1.00 | 0.00 |
| ATOM<br>C | 220 | CZ   | ARG | X | 16 | 18.865 | -25.279 | -26.994 | 1.00 | 0.00 |
| ATOM<br>N | 221 | NH1  | ARG | X | 16 | 19.122 | -24.477 | -27.918 | 1.00 | 0.00 |
| ATOM<br>H | 222 | HH11 | ARG | X | 16 | 18.510 | -23.715 | -28.129 | 1.00 | 0.00 |
| ATOM<br>H | 223 | HH12 | ARG | X | 16 | 19.833 | -24.695 | -28.586 | 1.00 | 0.00 |
| ATOM<br>N | 224 | NH2  | ARG | X | 16 | 19.606 | -26.307 | -26.804 | 1.00 | 0.00 |
| ATOM<br>H | 225 | HH21 | ARG | X | 16 | 19.534 | -26.676 | -25.877 | 1.00 | 0.00 |

|           |     |      |     |   |    |        |         |         |      |      |
|-----------|-----|------|-----|---|----|--------|---------|---------|------|------|
| ATOM<br>H | 226 | HH22 | ARG | X | 16 | 20.442 | -26.407 | -27.343 | 1.00 | 0.00 |
| ATOM<br>C | 227 | C    | ARG | X | 16 | 12.938 | -21.889 | -24.748 | 1.00 | 0.00 |
| ATOM<br>O | 228 | O    | ARG | X | 16 | 12.522 | -20.786 | -25.125 | 1.00 | 0.00 |
| ATOM<br>N | 229 | N    | SER | X | 17 | 12.374 | -22.460 | -23.669 | 1.00 | 0.00 |
| ATOM<br>H | 230 | HN   | SER | X | 17 | 12.768 | -23.255 | -23.215 | 1.00 | 0.00 |
| ATOM<br>C | 231 | CA   | SER | X | 17 | 11.119 | -21.980 | -23.103 | 1.00 | 0.00 |
| ATOM<br>H | 232 | HA   | SER | X | 17 | 10.683 | -21.293 | -23.813 | 1.00 | 0.00 |
| ATOM<br>C | 233 | CB   | SER | X | 17 | 10.158 | -23.064 | -22.842 | 1.00 | 0.00 |
| ATOM<br>H | 234 | HB1  | SER | X | 17 | 10.564 | -23.752 | -22.070 | 1.00 | 0.00 |
| ATOM<br>H | 235 | HB2  | SER | X | 17 | 10.043 | -23.707 | -23.741 | 1.00 | 0.00 |
| ATOM<br>O | 236 | OG   | SER | X | 17 | 8.823  | -22.690 | -22.317 | 1.00 | 0.00 |
| ATOM<br>H | 237 | HG1  | SER | X | 17 | 8.680  | -21.775 | -22.571 | 1.00 | 0.00 |
| ATOM<br>C | 238 | C    | SER | X | 17 | 11.379 | -21.325 | -21.722 | 1.00 | 0.00 |
| ATOM<br>O | 239 | O    | SER | X | 17 | 12.168 | -21.837 | -20.953 | 1.00 | 0.00 |
| ATOM<br>N | 240 | N    | LEU | X | 18 | 10.688 | -20.137 | -21.510 | 1.00 | 0.00 |
| ATOM<br>H | 241 | HN   | LEU | X | 18 | 10.079 | -19.691 | -22.161 | 1.00 | 0.00 |
| ATOM<br>C | 242 | CA   | LEU | X | 18 | 11.038 | -19.477 | -20.221 | 1.00 | 0.00 |
| ATOM<br>H | 243 | HA   | LEU | X | 18 | 11.764 | -20.045 | -19.659 | 1.00 | 0.00 |
| ATOM<br>C | 244 | CB   | LEU | X | 18 | 11.743 | -18.136 | -20.464 | 1.00 | 0.00 |
| ATOM<br>H | 245 | HB1  | LEU | X | 18 | 11.023 | -17.416 | -20.909 | 1.00 | 0.00 |
| ATOM<br>H | 246 | HB2  | LEU | X | 18 | 12.648 | -18.219 | -21.103 | 1.00 | 0.00 |
| ATOM<br>C | 247 | CG   | LEU | X | 18 | 12.376 | -17.421 | -19.221 | 1.00 | 0.00 |
| ATOM<br>H | 248 | HG   | LEU | X | 18 | 11.654 | -17.385 | -18.378 | 1.00 | 0.00 |
| ATOM<br>C | 249 | CD1  | LEU | X | 18 | 13.563 | -18.172 | -18.711 | 1.00 | 0.00 |
| ATOM<br>H | 250 | HD11 | LEU | X | 18 | 14.029 | -17.574 | -17.899 | 1.00 | 0.00 |

|           |     |      |     |   |    |        |         |         |      |      |
|-----------|-----|------|-----|---|----|--------|---------|---------|------|------|
| ATOM<br>H | 251 | HD12 | LEU | X | 18 | 14.416 | -18.460 | -19.361 | 1.00 | 0.00 |
| ATOM<br>H | 252 | HD13 | LEU | X | 18 | 13.300 | -19.115 | -18.184 | 1.00 | 0.00 |
| ATOM<br>C | 253 | CD2  | LEU | X | 18 | 12.771 | -15.981 | -19.369 | 1.00 | 0.00 |
| ATOM<br>H | 254 | HD21 | LEU | X | 18 | 13.278 | -15.526 | -18.491 | 1.00 | 0.00 |
| ATOM<br>H | 255 | HD22 | LEU | X | 18 | 11.968 | -15.358 | -19.817 | 1.00 | 0.00 |
| ATOM<br>H | 256 | HD23 | LEU | X | 18 | 13.457 | -15.899 | -20.239 | 1.00 | 0.00 |
| ATOM<br>C | 257 | C    | LEU | X | 18 | 9.841  | -19.254 | -19.262 | 1.00 | 0.00 |
| ATOM<br>O | 258 | O    | LEU | X | 18 | 8.775  | -18.815 | -19.672 | 1.00 | 0.00 |
| ATOM<br>N | 259 | N    | ARG | X | 19 | 10.098 | -19.351 | -17.951 | 1.00 | 0.00 |
| ATOM<br>H | 260 | HN   | ARG | X | 19 | 10.971 | -19.521 | -17.501 | 1.00 | 0.00 |
| ATOM<br>C | 261 | CA   | ARG | X | 19 | 9.089  | -18.991 | -16.961 | 1.00 | 0.00 |
| ATOM<br>H | 262 | HA   | ARG | X | 19 | 8.104  | -18.818 | -17.368 | 1.00 | 0.00 |
| ATOM<br>C | 263 | CB   | ARG | X | 19 | 9.185  | -20.200 | -15.931 | 1.00 | 0.00 |
| ATOM<br>H | 264 | HB1  | ARG | X | 19 | 10.139 | -20.126 | -15.366 | 1.00 | 0.00 |
| ATOM<br>H | 265 | HB2  | ARG | X | 19 | 9.157  | -21.218 | -16.375 | 1.00 | 0.00 |
| ATOM<br>C | 266 | CG   | ARG | X | 19 | 8.006  | -20.147 | -14.952 | 1.00 | 0.00 |
| ATOM<br>H | 267 | HG1  | ARG | X | 19 | 7.024  | -19.889 | -15.404 | 1.00 | 0.00 |
| ATOM<br>H | 268 | HG2  | ARG | X | 19 | 8.085  | -19.325 | -14.208 | 1.00 | 0.00 |
| ATOM<br>C | 269 | CD   | ARG | X | 19 | 7.715  | -21.486 | -14.181 | 1.00 | 0.00 |
| ATOM<br>H | 270 | HD1  | ARG | X | 19 | 8.441  | -21.653 | -13.357 | 1.00 | 0.00 |
| ATOM<br>H | 271 | HD2  | ARG | X | 19 | 7.721  | -22.318 | -14.918 | 1.00 | 0.00 |
| ATOM<br>N | 272 | NE   | ARG | X | 19 | 6.353  | -21.313 | -13.461 | 1.00 | 0.00 |
| ATOM<br>H | 273 | HE   | ARG | X | 19 | 6.402  | -21.394 | -12.465 | 1.00 | 0.00 |
| ATOM<br>C | 274 | CZ   | ARG | X | 19 | 5.221  | -21.394 | -14.086 | 1.00 | 0.00 |
| ATOM<br>N | 275 | NH1  | ARG | X | 19 | 5.082  | -21.394 | -15.403 | 1.00 | 0.00 |

|           |     |      |     |   |    |        |         |         |      |      |
|-----------|-----|------|-----|---|----|--------|---------|---------|------|------|
| ATOM<br>H | 276 | HH11 | ARG | X | 19 | 4.205  | -21.594 | -15.840 | 1.00 | 0.00 |
| ATOM<br>H | 277 | HH12 | ARG | X | 19 | 5.871  | -21.056 | -15.916 | 1.00 | 0.00 |
| ATOM<br>N | 278 | NH2  | ARG | X | 19 | 4.177  | -21.544 | -13.288 | 1.00 | 0.00 |
| ATOM<br>H | 279 | HH21 | ARG | X | 19 | 4.358  | -21.707 | -12.318 | 1.00 | 0.00 |
| ATOM<br>H | 280 | HH22 | ARG | X | 19 | 3.266  | -21.721 | -13.658 | 1.00 | 0.00 |
| ATOM<br>C | 281 | C    | ARG | X | 19 | 9.471  | -17.712 | -16.178 | 1.00 | 0.00 |
| ATOM<br>O | 282 | O    | ARG | X | 19 | 10.432 | -17.595 | -15.474 | 1.00 | 0.00 |
| ATOM<br>N | 283 | N    | LEU | X | 20 | 8.544  | -16.670 | -16.293 | 1.00 | 0.00 |
| ATOM<br>H | 284 | HN   | LEU | X | 20 | 7.773  | -16.725 | -16.922 | 1.00 | 0.00 |
| ATOM<br>C | 285 | CA   | LEU | X | 20 | 8.703  | -15.310 | -15.771 | 1.00 | 0.00 |
| ATOM<br>H | 286 | HA   | LEU | X | 20 | 9.620  | -15.188 | -15.214 | 1.00 | 0.00 |
| ATOM<br>C | 287 | CB   | LEU | X | 20 | 8.631  | -14.240 | -16.828 | 1.00 | 0.00 |
| ATOM<br>H | 288 | HB1  | LEU | X | 20 | 7.755  | -14.359 | -17.502 | 1.00 | 0.00 |
| ATOM<br>H | 289 | HB2  | LEU | X | 20 | 9.465  | -14.302 | -17.559 | 1.00 | 0.00 |
| ATOM<br>C | 290 | CG   | LEU | X | 20 | 8.660  | -12.784 | -16.276 | 1.00 | 0.00 |
| ATOM<br>H | 291 | HG   | LEU | X | 20 | 7.847  | -12.586 | -15.545 | 1.00 | 0.00 |
| ATOM<br>C | 292 | CD1  | LEU | X | 20 | 9.918  | -12.468 | -15.562 | 1.00 | 0.00 |
| ATOM<br>H | 293 | HD11 | LEU | X | 20 | 9.987  | -11.403 | -15.255 | 1.00 | 0.00 |
| ATOM<br>H | 294 | HD12 | LEU | X | 20 | 10.819 | -12.644 | -16.188 | 1.00 | 0.00 |
| ATOM<br>H | 295 | HD13 | LEU | X | 20 | 10.091 | -13.188 | -14.734 | 1.00 | 0.00 |
| ATOM<br>C | 296 | CD2  | LEU | X | 20 | 8.421  | -11.698 | -17.320 | 1.00 | 0.00 |
| ATOM<br>H | 297 | HD21 | LEU | X | 20 | 9.386  | -11.494 | -17.830 | 1.00 | 0.00 |
| ATOM<br>H | 298 | HD22 | LEU | X | 20 | 8.123  | -10.707 | -16.915 | 1.00 | 0.00 |
| ATOM<br>H | 299 | HD23 | LEU | X | 20 | 7.641  | -12.041 | -18.034 | 1.00 | 0.00 |
| ATOM<br>C | 300 | C    | LEU | X | 20 | 7.551  | -15.156 | -14.754 | 1.00 | 0.00 |

|           |     |     |     |   |    |       |         |         |      |      |
|-----------|-----|-----|-----|---|----|-------|---------|---------|------|------|
| ATOM<br>O | 301 | O   | LEU | X | 20 | 6.380 | -15.505 | -14.996 | 1.00 | 0.00 |
| ATOM<br>N | 302 | N   | SER | X | 21 | 7.827 | -14.562 | -13.561 | 1.00 | 0.00 |
| ATOM<br>H | 303 | HN  | SER | X | 21 | 8.679 | -14.165 | -13.229 | 1.00 | 0.00 |
| ATOM<br>C | 304 | CA  | SER | X | 21 | 6.771 | -14.355 | -12.639 | 1.00 | 0.00 |
| ATOM<br>H | 305 | HA  | SER | X | 21 | 5.941 | -13.960 | -13.206 | 1.00 | 0.00 |
| ATOM<br>C | 306 | CB  | SER | X | 21 | 6.476 | -15.570 | -11.764 | 1.00 | 0.00 |
| ATOM<br>H | 307 | HB1 | SER | X | 21 | 6.182 | -16.291 | -12.557 | 1.00 | 0.00 |
| ATOM<br>H | 308 | HB2 | SER | X | 21 | 5.615 | -15.419 | -11.078 | 1.00 | 0.00 |
| ATOM<br>O | 309 | OG  | SER | X | 21 | 7.557 | -15.860 | -10.965 | 1.00 | 0.00 |
| ATOM<br>H | 310 | HG1 | SER | X | 21 | 8.199 | -16.323 | -11.507 | 1.00 | 0.00 |
| ATOM<br>C | 311 | C   | SER | X | 21 | 6.960 | -13.097 | -11.743 | 1.00 | 0.00 |
| ATOM<br>O | 312 | O   | SER | X | 21 | 8.075 | -12.538 | -11.630 | 1.00 | 0.00 |
| ATOM<br>N | 313 | N   | CYS | X | 22 | 5.900 | -12.750 | -11.024 | 1.00 | 0.00 |
| ATOM<br>H | 314 | HN  | CYS | X | 22 | 4.970 | -13.088 | -11.141 | 1.00 | 0.00 |
| ATOM<br>C | 315 | CA  | CYS | X | 22 | 5.989 | -11.743 | -9.953  | 1.00 | 0.00 |
| ATOM<br>H | 316 | HA  | CYS | X | 22 | 6.874 | -11.986 | -9.383  | 1.00 | 0.00 |
| ATOM<br>C | 317 | CB  | CYS | X | 22 | 6.085 | -10.243 | -10.496 | 1.00 | 0.00 |
| ATOM<br>H | 318 | HB1 | CYS | X | 22 | 7.010 | -10.352 | -11.103 | 1.00 | 0.00 |
| ATOM<br>H | 319 | HB2 | CYS | X | 22 | 6.475 | -9.564  | -9.709  | 1.00 | 0.00 |
| ATOM<br>S | 320 | SG  | CYS | X | 22 | 4.633 | -9.700  | -11.478 | 1.00 | 0.00 |
| ATOM<br>C | 321 | C   | CYS | X | 22 | 4.874 | -11.973 | -8.980  | 1.00 | 0.00 |
| ATOM<br>O | 322 | O   | CYS | X | 22 | 3.856 | -12.563 | -9.280  | 1.00 | 0.00 |
| ATOM<br>N | 323 | N   | ALA | X | 23 | 5.082 | -11.610 | -7.679  | 1.00 | 0.00 |
| ATOM<br>H | 324 | HN  | ALA | X | 23 | 5.953 | -11.248 | -7.357  | 1.00 | 0.00 |
| ATOM<br>C | 325 | CA  | ALA | X | 23 | 4.203 | -12.041 | -6.606  | 1.00 | 0.00 |

|           |     |     |     |   |    |        |         |        |      |      |
|-----------|-----|-----|-----|---|----|--------|---------|--------|------|------|
| ATOM<br>H | 326 | HA  | ALA | X | 23 | 3.313  | -12.534 | -6.967 | 1.00 | 0.00 |
| ATOM<br>C | 327 | CB  | ALA | X | 23 | 4.979  | -12.862 | -5.613 | 1.00 | 0.00 |
| ATOM<br>H | 328 | HB1 | ALA | X | 23 | 4.544  | -12.838 | -4.590 | 1.00 | 0.00 |
| ATOM<br>H | 329 | HB2 | ALA | X | 23 | 6.048  | -12.612 | -5.439 | 1.00 | 0.00 |
| ATOM<br>H | 330 | HB3 | ALA | X | 23 | 4.962  | -13.922 | -5.943 | 1.00 | 0.00 |
| ATOM<br>C | 331 | C   | ALA | X | 23 | 3.763  | -10.784 | -5.816 | 1.00 | 0.00 |
| ATOM<br>O | 332 | O   | ALA | X | 23 | 4.653  | -9.969  | -5.451 | 1.00 | 0.00 |
| ATOM<br>N | 333 | N   | ALA | X | 24 | 2.496  | -10.673 | -5.460 | 1.00 | 0.00 |
| ATOM<br>H | 334 | HN  | ALA | X | 24 | 1.893  | -11.425 | -5.715 | 1.00 | 0.00 |
| ATOM<br>C | 335 | CA  | ALA | X | 24 | 2.029  | -9.626  | -4.666 | 1.00 | 0.00 |
| ATOM<br>H | 336 | HA  | ALA | X | 24 | 2.198  | -8.797  | -5.337 | 1.00 | 0.00 |
| ATOM<br>C | 337 | CB  | ALA | X | 24 | 0.491  | -9.664  | -4.391 | 1.00 | 0.00 |
| ATOM<br>H | 338 | HB1 | ALA | X | 24 | -0.122 | -9.558  | -5.311 | 1.00 | 0.00 |
| ATOM<br>H | 339 | HB2 | ALA | X | 24 | 0.110  | -9.127  | -3.496 | 1.00 | 0.00 |
| ATOM<br>H | 340 | HB3 | ALA | X | 24 | 0.293  | -10.719 | -4.103 | 1.00 | 0.00 |
| ATOM<br>C | 341 | C   | ALA | X | 24 | 2.737  | -9.406  | -3.277 | 1.00 | 0.00 |
| ATOM<br>O | 342 | O   | ALA | X | 24 | 2.962  | -10.365 | -2.533 | 1.00 | 0.00 |
| ATOM<br>N | 343 | N   | SER | X | 25 | 3.078  | -8.195  | -2.833 | 1.00 | 0.00 |
| ATOM<br>H | 344 | HN  | SER | X | 25 | 3.075  | -7.443  | -3.487 | 1.00 | 0.00 |
| ATOM<br>C | 345 | CA  | SER | X | 25 | 3.386  | -7.843  | -1.436 | 1.00 | 0.00 |
| ATOM<br>H | 346 | HA  | SER | X | 25 | 3.146  | -8.613  | -0.718 | 1.00 | 0.00 |
| ATOM<br>C | 347 | CB  | SER | X | 25 | 4.891  | -7.637  | -1.352 | 1.00 | 0.00 |
| ATOM<br>H | 348 | HB1 | SER | X | 25 | 5.328  | -6.904  | -2.064 | 1.00 | 0.00 |
| ATOM<br>H | 349 | HB2 | SER | X | 25 | 5.338  | -8.590  | -1.708 | 1.00 | 0.00 |
| ATOM<br>O | 350 | OG  | SER | X | 25 | 5.421  | -7.303  | -0.055 | 1.00 | 0.00 |

|           |     |     |     |   |    |        |        |        |      |      |
|-----------|-----|-----|-----|---|----|--------|--------|--------|------|------|
| ATOM<br>H | 351 | HG1 | SER | X | 25 | 5.237  | -6.362 | -0.009 | 1.00 | 0.00 |
| ATOM<br>C | 352 | C   | SER | X | 25 | 2.784  | -6.515 | -0.962 | 1.00 | 0.00 |
| ATOM<br>O | 353 | O   | SER | X | 25 | 3.251  | -5.424 | -1.263 | 1.00 | 0.00 |
| ATOM<br>N | 354 | N   | GLY | X | 26 | 1.699  | -6.573 | -0.131 | 1.00 | 0.00 |
| ATOM<br>H | 355 | HN  | GLY | X | 26 | 1.325  | -7.459 | 0.133  | 1.00 | 0.00 |
| ATOM<br>C | 356 | CA  | GLY | X | 26 | 1.034  | -5.441 | 0.584  | 1.00 | 0.00 |
| ATOM<br>H | 357 | HA1 | GLY | X | 26 | 1.445  | -4.526 | 0.185  | 1.00 | 0.00 |
| ATOM<br>H | 358 | HA2 | GLY | X | 26 | 1.174  | -5.532 | 1.651  | 1.00 | 0.00 |
| ATOM<br>C | 359 | C   | GLY | X | 26 | -0.470 | -5.384 | 0.397  | 1.00 | 0.00 |
| ATOM<br>O | 360 | O   | GLY | X | 26 | -1.062 | -4.388 | 0.739  | 1.00 | 0.00 |
| ATOM<br>N | 361 | N   | PHE | X | 27 | -1.078 | -6.359 | -0.228 | 1.00 | 0.00 |
| ATOM<br>H | 362 | HN  | PHE | X | 27 | -0.596 | -7.210 | -0.420 | 1.00 | 0.00 |
| ATOM<br>C | 363 | CA  | PHE | X | 27 | -2.456 | -6.255 | -0.775 | 1.00 | 0.00 |
| ATOM<br>H | 364 | HA  | PHE | X | 27 | -3.003 | -5.656 | -0.062 | 1.00 | 0.00 |
| ATOM<br>C | 365 | CB  | PHE | X | 27 | -2.404 | -5.386 | -2.013 | 1.00 | 0.00 |
| ATOM<br>H | 366 | HB1 | PHE | X | 27 | -1.812 | -4.456 | -1.874 | 1.00 | 0.00 |
| ATOM<br>H | 367 | HB2 | PHE | X | 27 | -3.402 | -5.045 | -2.360 | 1.00 | 0.00 |
| ATOM<br>C | 368 | CG  | PHE | X | 27 | -1.787 | -6.026 | -3.225 | 1.00 | 0.00 |
| ATOM<br>C | 369 | CD1 | PHE | X | 27 | -0.359 | -5.985 | -3.426 | 1.00 | 0.00 |
| ATOM<br>H | 370 | HD1 | PHE | X | 27 | 0.288  | -5.690 | -2.613 | 1.00 | 0.00 |
| ATOM<br>C | 371 | CE1 | PHE | X | 27 | 0.142  | -6.392 | -4.630 | 1.00 | 0.00 |
| ATOM<br>H | 372 | HE1 | PHE | X | 27 | 1.215  | -6.293 | -4.701 | 1.00 | 0.00 |
| ATOM<br>C | 373 | CZ  | PHE | X | 27 | -0.630 | -6.753 | -5.746 | 1.00 | 0.00 |
| ATOM<br>H | 374 | HZ  | PHE | X | 27 | -0.213 | -7.082 | -6.686 | 1.00 | 0.00 |
| ATOM<br>C | 375 | CD2 | PHE | X | 27 | -2.526 | -6.665 | -4.202 | 1.00 | 0.00 |

|           |     |      |     |   |    |        |         |        |      |      |
|-----------|-----|------|-----|---|----|--------|---------|--------|------|------|
| ATOM<br>H | 376 | HD2  | PHE | X | 27 | -3.567 | -6.792  | -3.944 | 1.00 | 0.00 |
| ATOM<br>C | 377 | CE2  | PHE | X | 27 | -1.939 | -7.094  | -5.492 | 1.00 | 0.00 |
| ATOM<br>H | 378 | HE2  | PHE | X | 27 | -2.393 | -7.615  | -6.322 | 1.00 | 0.00 |
| ATOM<br>C | 379 | C    | PHE | X | 27 | -3.133 | -7.610  | -0.872 | 1.00 | 0.00 |
| ATOM<br>O | 380 | O    | PHE | X | 27 | -2.529 | -8.650  | -0.687 | 1.00 | 0.00 |
| ATOM<br>N | 381 | N    | THR | X | 28 | -4.418 | -7.595  | -1.195 | 1.00 | 0.00 |
| ATOM<br>H | 382 | HN   | THR | X | 28 | -4.976 | -6.768  | -1.184 | 1.00 | 0.00 |
| ATOM<br>C | 383 | CA   | THR | X | 28 | -5.154 | -8.896  | -1.556 | 1.00 | 0.00 |
| ATOM<br>H | 384 | HA   | THR | X | 28 | -4.728 | -9.653  | -0.915 | 1.00 | 0.00 |
| ATOM<br>C | 385 | CB   | THR | X | 28 | -6.584 | -8.809  | -1.141 | 1.00 | 0.00 |
| ATOM<br>H | 386 | HB   | THR | X | 28 | -7.209 | -8.422  | -1.975 | 1.00 | 0.00 |
| ATOM<br>O | 387 | OG1  | THR | X | 28 | -6.886 | -7.935  | -0.011 | 1.00 | 0.00 |
| ATOM<br>H | 388 | HG1  | THR | X | 28 | -7.706 | -8.265  | 0.362  | 1.00 | 0.00 |
| ATOM<br>C | 389 | CG2  | THR | X | 28 | -7.199 | -10.134 | -0.843 | 1.00 | 0.00 |
| ATOM<br>H | 390 | HG21 | THR | X | 28 | -8.296 | -10.043 | -0.694 | 1.00 | 0.00 |
| ATOM<br>H | 391 | HG22 | THR | X | 28 | -6.783 | -10.673 | 0.034  | 1.00 | 0.00 |
| ATOM<br>H | 392 | HG23 | THR | X | 28 | -7.021 | -10.852 | -1.672 | 1.00 | 0.00 |
| ATOM<br>C | 393 | C    | THR | X | 28 | -5.071 | -9.214  | -3.061 | 1.00 | 0.00 |
| ATOM<br>O | 394 | O    | THR | X | 28 | -5.693 | -8.607  | -3.944 | 1.00 | 0.00 |
| ATOM<br>N | 395 | N    | PHE | X | 29 | -4.249 | -10.235 | -3.463 | 1.00 | 0.00 |
| ATOM<br>H | 396 | HN   | PHE | X | 29 | -3.730 | -10.816 | -2.840 | 1.00 | 0.00 |
| ATOM<br>C | 397 | CA   | PHE | X | 29 | -4.056 | -10.421 | -4.935 | 1.00 | 0.00 |
| ATOM<br>H | 398 | HA   | PHE | X | 29 | -3.564 | -9.490  | -5.177 | 1.00 | 0.00 |
| ATOM<br>C | 399 | CB   | PHE | X | 29 | -3.062 | -11.619 | -5.088 | 1.00 | 0.00 |
| ATOM<br>H | 400 | HB1  | PHE | X | 29 | -3.622 | -12.520 | -4.758 | 1.00 | 0.00 |





|           |     |     |       |    |        |        |        |      |      |
|-----------|-----|-----|-------|----|--------|--------|--------|------|------|
| ATOM<br>N | 426 | N   | SER X | 31 | -8.230 | -9.364 | -5.616 | 1.00 | 0.00 |
| ATOM<br>H | 427 | HN  | SER X | 31 | -7.642 | -9.377 | -4.811 | 1.00 | 0.00 |
| ATOM<br>C | 428 | CA  | SER X | 31 | -8.904 | -8.075 | -6.057 | 1.00 | 0.00 |
| ATOM<br>H | 429 | HA  | SER X | 31 | -9.966 | -8.271 | -6.065 | 1.00 | 0.00 |
| ATOM<br>C | 430 | CB  | SER X | 31 | -8.734 | -6.860 | -5.053 | 1.00 | 0.00 |
| ATOM<br>H | 431 | HB1 | SER X | 31 | -9.384 | -5.995 | -5.303 | 1.00 | 0.00 |
| ATOM<br>H | 432 | HB2 | SER X | 31 | -7.635 | -6.699 | -5.069 | 1.00 | 0.00 |
| ATOM<br>O | 433 | OG  | SER X | 31 | -8.941 | -7.440 | -3.742 | 1.00 | 0.00 |
| ATOM<br>H | 434 | HG1 | SER X | 31 | -9.000 | -6.711 | -3.121 | 1.00 | 0.00 |
| ATOM<br>C | 435 | C   | SER X | 31 | -8.439 | -7.435 | -7.316 | 1.00 | 0.00 |
| ATOM<br>O | 436 | O   | SER X | 31 | -9.203 | -6.681 | -7.894 | 1.00 | 0.00 |
| ATOM<br>N | 437 | N   | TYR X | 32 | -7.172 | -7.779 | -7.711 | 1.00 | 0.00 |
| ATOM<br>H | 438 | HN  | TYR X | 32 | -6.691 | -8.597 | -7.404 | 1.00 | 0.00 |
| ATOM<br>C | 439 | CA  | TYR X | 32 | -6.575 | -7.088 | -8.854 | 1.00 | 0.00 |
| ATOM<br>H | 440 | HA  | TYR X | 32 | -7.247 | -6.307 | -9.180 | 1.00 | 0.00 |
| ATOM<br>C | 441 | CB  | TYR X | 32 | -5.133 | -6.722 | -8.548 | 1.00 | 0.00 |
| ATOM<br>H | 442 | HB1 | TYR X | 32 | -4.650 | -6.359 | -9.480 | 1.00 | 0.00 |
| ATOM<br>H | 443 | HB2 | TYR X | 32 | -4.613 | -7.596 | -8.101 | 1.00 | 0.00 |
| ATOM<br>C | 444 | CG  | TYR X | 32 | -5.179 | -5.550 | -7.594 | 1.00 | 0.00 |
| ATOM<br>C | 445 | CD1 | TYR X | 32 | -5.398 | -5.769 | -6.204 | 1.00 | 0.00 |
| ATOM<br>H | 446 | HD1 | TYR X | 32 | -5.375 | -6.761 | -5.778 | 1.00 | 0.00 |
| ATOM<br>C | 447 | CE1 | TYR X | 32 | -5.407 | -4.751 | -5.210 | 1.00 | 0.00 |
| ATOM<br>H | 448 | HE1 | TYR X | 32 | -5.590 | -4.968 | -4.168 | 1.00 | 0.00 |
| ATOM<br>C | 449 | CZ  | TYR X | 32 | -5.308 | -3.452 | -5.764 | 1.00 | 0.00 |
| ATOM<br>O | 450 | OH  | TYR X | 32 | -5.574 | -2.384 | -4.977 | 1.00 | 0.00 |



|           |     |     |     |   |    |        |         |         |      |      |
|-----------|-----|-----|-----|---|----|--------|---------|---------|------|------|
| ATOM<br>H | 476 | HG1 | MET | X | 34 | -2.280 | -10.638 | -10.934 | 1.00 | 0.00 |
| ATOM<br>H | 477 | HG2 | MET | X | 34 | -3.800 | -9.620  | -11.169 | 1.00 | 0.00 |
| ATOM<br>S | 478 | SD  | MET | X | 34 | -1.744 | -8.335  | -10.501 | 1.00 | 0.00 |
| ATOM<br>C | 479 | CE  | MET | X | 34 | -0.079 | -8.582  | -11.313 | 1.00 | 0.00 |
| ATOM<br>H | 480 | HE1 | MET | X | 34 | -0.155 | -8.081  | -12.302 | 1.00 | 0.00 |
| ATOM<br>H | 481 | HE2 | MET | X | 34 | 0.064  | -9.683  | -11.273 | 1.00 | 0.00 |
| ATOM<br>H | 482 | HE3 | MET | X | 34 | 0.748  | -8.011  | -10.840 | 1.00 | 0.00 |
| ATOM<br>C | 483 | C   | MET | X | 34 | -2.551 | -8.544  | -14.962 | 1.00 | 0.00 |
| ATOM<br>O | 484 | O   | MET | X | 34 | -3.276 | -9.151  | -15.718 | 1.00 | 0.00 |
| ATOM<br>N | 485 | N   | HSD | X | 35 | -1.416 | -7.928  | -15.324 | 1.00 | 0.00 |
| ATOM<br>H | 486 | HN  | HSD | X | 35 | -0.796 | -7.522  | -14.657 | 1.00 | 0.00 |
| ATOM<br>C | 487 | CA  | HSD | X | 35 | -0.942 | -7.695  | -16.694 | 1.00 | 0.00 |
| ATOM<br>H | 488 | HA  | HSD | X | 35 | -1.355 | -8.575  | -17.166 | 1.00 | 0.00 |
| ATOM<br>C | 489 | CB  | HSD | X | 35 | -1.651 | -6.496  | -17.474 | 1.00 | 0.00 |
| ATOM<br>H | 490 | HB1 | HSD | X | 35 | -2.306 | -6.876  | -18.288 | 1.00 | 0.00 |
| ATOM<br>H | 491 | HB2 | HSD | X | 35 | -0.813 | -5.962  | -17.972 | 1.00 | 0.00 |
| ATOM<br>N | 492 | ND1 | HSD | X | 35 | -2.155 | -4.108  | -16.397 | 1.00 | 0.00 |
| ATOM<br>H | 493 | HD1 | HSD | X | 35 | -1.355 | -3.607  | -16.726 | 1.00 | 0.00 |
| ATOM<br>C | 494 | CG  | HSD | X | 35 | -2.423 | -5.490  | -16.593 | 1.00 | 0.00 |
| ATOM<br>C | 495 | CE1 | HSD | X | 35 | -3.261 | -3.478  | -15.875 | 1.00 | 0.00 |
| ATOM<br>H | 496 | HE1 | HSD | X | 35 | -3.453 | -2.430  | -15.648 | 1.00 | 0.00 |
| ATOM<br>N | 497 | NE2 | HSD | X | 35 | -4.235 | -4.421  | -15.671 | 1.00 | 0.00 |
| ATOM<br>C | 498 | CD2 | HSD | X | 35 | -3.675 | -5.630  | -16.123 | 1.00 | 0.00 |
| ATOM<br>H | 499 | HD2 | HSD | X | 35 | -4.212 | -6.569  | -16.066 | 1.00 | 0.00 |
| ATOM<br>C | 500 | C   | HSD | X | 35 | 0.625  | -7.600  | -16.712 | 1.00 | 0.00 |

|           |     |     |     |   |    |       |         |         |      |      |
|-----------|-----|-----|-----|---|----|-------|---------|---------|------|------|
| ATOM<br>O | 501 | O   | HSD | X | 35 | 1.297 | -7.454  | -15.755 | 1.00 | 0.00 |
| ATOM<br>N | 502 | N   | TRP | X | 36 | 1.208 | -7.682  | -17.909 | 1.00 | 0.00 |
| ATOM<br>H | 503 | HN  | TRP | X | 36 | 0.647 | -7.892  | -18.705 | 1.00 | 0.00 |
| ATOM<br>C | 504 | CA  | TRP | X | 36 | 2.634 | -7.375  | -18.159 | 1.00 | 0.00 |
| ATOM<br>H | 505 | HA  | TRP | X | 36 | 2.956 | -6.825  | -17.288 | 1.00 | 0.00 |
| ATOM<br>C | 506 | CB  | TRP | X | 36 | 3.376 | -8.695  | -18.496 | 1.00 | 0.00 |
| ATOM<br>H | 507 | HB1 | TRP | X | 36 | 4.312 | -8.563  | -19.080 | 1.00 | 0.00 |
| ATOM<br>H | 508 | HB2 | TRP | X | 36 | 2.771 | -9.233  | -19.257 | 1.00 | 0.00 |
| ATOM<br>C | 509 | CG  | TRP | X | 36 | 3.424 | -9.710  | -17.417 | 1.00 | 0.00 |
| ATOM<br>C | 510 | CD1 | TRP | X | 36 | 2.686 | -10.908 | -17.386 | 1.00 | 0.00 |
| ATOM<br>H | 511 | HD1 | TRP | X | 36 | 1.892 | -11.098 | -18.092 | 1.00 | 0.00 |
| ATOM<br>N | 512 | NE1 | TRP | X | 36 | 3.183 | -11.781 | -16.381 | 1.00 | 0.00 |
| ATOM<br>H | 513 | HE1 | TRP | X | 36 | 2.895 | -12.683 | -16.146 | 1.00 | 0.00 |
| ATOM<br>C | 514 | CE2 | TRP | X | 36 | 4.310 | -11.155 | -15.815 | 1.00 | 0.00 |
| ATOM<br>C | 515 | CD2 | TRP | X | 36 | 4.513 | -9.900  | -16.458 | 1.00 | 0.00 |
| ATOM<br>C | 516 | CE3 | TRP | X | 36 | 5.666 | -9.132  | -16.123 | 1.00 | 0.00 |
| ATOM<br>H | 517 | HE3 | TRP | X | 36 | 5.877 | -8.169  | -16.563 | 1.00 | 0.00 |
| ATOM<br>C | 518 | CZ3 | TRP | X | 36 | 6.548 | -9.587  | -15.147 | 1.00 | 0.00 |
| ATOM<br>H | 519 | HZ3 | TRP | X | 36 | 7.396 | -8.958  | -14.920 | 1.00 | 0.00 |
| ATOM<br>C | 520 | CZ2 | TRP | X | 36 | 5.201 | -11.523 | -14.767 | 1.00 | 0.00 |
| ATOM<br>H | 521 | HZ2 | TRP | X | 36 | 4.832 | -12.317 | -14.134 | 1.00 | 0.00 |
| ATOM<br>C | 522 | CH2 | TRP | X | 36 | 6.292 | -10.779 | -14.405 | 1.00 | 0.00 |
| ATOM<br>H | 523 | HH2 | TRP | X | 36 | 7.030 | -10.965 | -13.639 | 1.00 | 0.00 |
| ATOM<br>C | 524 | C   | TRP | X | 36 | 2.862 | -6.353  | -19.310 | 1.00 | 0.00 |
| ATOM<br>O | 525 | O   | TRP | X | 36 | 2.081 | -6.312  | -20.262 | 1.00 | 0.00 |

|           |     |      |       |    |       |        |         |      |      |
|-----------|-----|------|-------|----|-------|--------|---------|------|------|
| ATOM<br>N | 526 | N    | VAL X | 37 | 3.933 | -5.599 | -19.264 | 1.00 | 0.00 |
| ATOM<br>H | 527 | HN   | VAL X | 37 | 4.547 | -5.583 | -18.478 | 1.00 | 0.00 |
| ATOM<br>C | 528 | CA   | VAL X | 37 | 4.369 | -4.680 | -20.258 | 1.00 | 0.00 |
| ATOM<br>H | 529 | HA   | VAL X | 37 | 4.008 | -4.885 | -21.255 | 1.00 | 0.00 |
| ATOM<br>C | 530 | CB   | VAL X | 37 | 4.071 | -3.218 | -19.753 | 1.00 | 0.00 |
| ATOM<br>H | 531 | HB   | VAL X | 37 | 4.463 | -3.060 | -18.726 | 1.00 | 0.00 |
| ATOM<br>C | 532 | CG1  | VAL X | 37 | 4.628 | -2.173 | -20.666 | 1.00 | 0.00 |
| ATOM<br>H | 533 | HG11 | VAL X | 37 | 4.212 | -1.168 | -20.436 | 1.00 | 0.00 |
| ATOM<br>H | 534 | HG12 | VAL X | 37 | 4.432 | -2.339 | -21.747 | 1.00 | 0.00 |
| ATOM<br>H | 535 | HG13 | VAL X | 37 | 5.707 | -1.979 | -20.487 | 1.00 | 0.00 |
| ATOM<br>C | 536 | CG2  | VAL X | 37 | 2.558 | -3.096 | -19.695 | 1.00 | 0.00 |
| ATOM<br>H | 537 | HG21 | VAL X | 37 | 2.162 | -3.720 | -20.525 | 1.00 | 0.00 |
| ATOM<br>H | 538 | HG22 | VAL X | 37 | 2.107 | -2.088 | -19.816 | 1.00 | 0.00 |
| ATOM<br>H | 539 | HG23 | VAL X | 37 | 2.086 | -3.420 | -18.742 | 1.00 | 0.00 |
| ATOM<br>C | 540 | C    | VAL X | 37 | 5.798 | -4.871 | -20.409 | 1.00 | 0.00 |
| ATOM<br>O | 541 | O    | VAL X | 37 | 6.422 | -5.599 | -19.632 | 1.00 | 0.00 |
| ATOM<br>N | 542 | N    | ARG X | 38 | 6.426 | -4.347 | -21.445 | 1.00 | 0.00 |
| ATOM<br>H | 543 | HN   | ARG X | 38 | 5.968 | -3.826 | -22.161 | 1.00 | 0.00 |
| ATOM<br>C | 544 | CA   | ARG X | 38 | 7.872 | -4.413 | -21.640 | 1.00 | 0.00 |
| ATOM<br>H | 545 | HA   | ARG X | 38 | 8.393 | -4.180 | -20.723 | 1.00 | 0.00 |
| ATOM<br>C | 546 | CB   | ARG X | 38 | 8.415 | -5.765 | -22.127 | 1.00 | 0.00 |
| ATOM<br>H | 547 | HB1  | ARG X | 38 | 7.997 | -6.532 | -21.440 | 1.00 | 0.00 |
| ATOM<br>H | 548 | HB2  | ARG X | 38 | 9.515 | -5.900 | -22.205 | 1.00 | 0.00 |
| ATOM<br>C | 549 | CG   | ARG X | 38 | 7.895 | -6.193 | -23.597 | 1.00 | 0.00 |
| ATOM<br>H | 550 | HG1  | ARG X | 38 | 8.280 | -5.389 | -24.260 | 1.00 | 0.00 |

|           |     |      |     |   |    |        |         |         |      |      |
|-----------|-----|------|-----|---|----|--------|---------|---------|------|------|
| ATOM<br>H | 551 | HG2  | ARG | X | 38 | 6.789  | -6.102  | -23.652 | 1.00 | 0.00 |
| ATOM<br>C | 552 | CD   | ARG | X | 38 | 8.444  | -7.504  | -24.079 | 1.00 | 0.00 |
| ATOM<br>H | 553 | HD1  | ARG | X | 38 | 7.840  | -8.388  | -23.784 | 1.00 | 0.00 |
| ATOM<br>H | 554 | HD2  | ARG | X | 38 | 9.531  | -7.620  | -23.878 | 1.00 | 0.00 |
| ATOM<br>N | 555 | NE   | ARG | X | 38 | 8.453  | -7.550  | -25.601 | 1.00 | 0.00 |
| ATOM<br>H | 556 | HE   | ARG | X | 38 | 8.321  | -6.700  | -26.112 | 1.00 | 0.00 |
| ATOM<br>C | 557 | CZ   | ARG | X | 38 | 8.692  | -8.657  | -26.353 | 1.00 | 0.00 |
| ATOM<br>N | 558 | NH1  | ARG | X | 38 | 8.674  | -9.909  | -26.006 | 1.00 | 0.00 |
| ATOM<br>H | 559 | HH11 | ARG | X | 38 | 8.479  | -10.168 | -25.060 | 1.00 | 0.00 |
| ATOM<br>H | 560 | HH12 | ARG | X | 38 | 8.685  | -10.533 | -26.787 | 1.00 | 0.00 |
| ATOM<br>N | 561 | NH2  | ARG | X | 38 | 8.807  | -8.477  | -27.655 | 1.00 | 0.00 |
| ATOM<br>H | 562 | HH21 | ARG | X | 38 | 8.556  | -7.585  | -28.030 | 1.00 | 0.00 |
| ATOM<br>H | 563 | HH22 | ARG | X | 38 | 8.575  | -9.230  | -28.270 | 1.00 | 0.00 |
| ATOM<br>C | 564 | C    | ARG | X | 38 | 8.337  | -3.382  | -22.681 | 1.00 | 0.00 |
| ATOM<br>O | 565 | O    | ARG | X | 38 | 7.477  | -2.823  | -23.429 | 1.00 | 0.00 |
| ATOM<br>N | 566 | N    | GLN | X | 39 | 9.674  | -3.271  | -22.782 | 1.00 | 0.00 |
| ATOM<br>H | 567 | HN   | GLN | X | 39 | 10.262 | -3.668  | -22.081 | 1.00 | 0.00 |
| ATOM<br>C | 568 | CA   | GLN | X | 39 | 10.342 | -2.709  | -23.990 | 1.00 | 0.00 |
| ATOM<br>H | 569 | HA   | GLN | X | 39 | 9.654  | -2.853  | -24.810 | 1.00 | 0.00 |
| ATOM<br>C | 570 | CB   | GLN | X | 39 | 10.450 | -1.208  | -23.821 | 1.00 | 0.00 |
| ATOM<br>H | 571 | HB1  | GLN | X | 39 | 9.436  | -0.913  | -23.477 | 1.00 | 0.00 |
| ATOM<br>H | 572 | HB2  | GLN | X | 39 | 10.648 | -0.727  | -24.802 | 1.00 | 0.00 |
| ATOM<br>C | 573 | CG   | GLN | X | 39 | 11.506 | -0.677  | -22.785 | 1.00 | 0.00 |
| ATOM<br>H | 574 | HG1  | GLN | X | 39 | 12.582 | -0.876  | -22.978 | 1.00 | 0.00 |
| ATOM<br>H | 575 | HG2  | GLN | X | 39 | 11.324 | -1.026  | -21.746 | 1.00 | 0.00 |







|           |     |     |     |   |    |        |        |         |      |      |
|-----------|-----|-----|-----|---|----|--------|--------|---------|------|------|
| ATOM<br>H | 626 | HD2 | LYS | X | 43 | 13.632 | 1.100  | -31.470 | 1.00 | 0.00 |
| ATOM<br>C | 627 | CE  | LYS | X | 43 | 11.695 | 0.621  | -32.374 | 1.00 | 0.00 |
| ATOM<br>H | 628 | HE1 | LYS | X | 43 | 11.891 | 1.282  | -33.245 | 1.00 | 0.00 |
| ATOM<br>H | 629 | HE2 | LYS | X | 43 | 11.115 | 1.240  | -31.656 | 1.00 | 0.00 |
| ATOM<br>N | 630 | NZ  | LYS | X | 43 | 10.998 | -0.577 | -32.918 | 1.00 | 0.00 |
| ATOM<br>H | 631 | HZ1 | LYS | X | 43 | 11.680 | -1.275 | -33.277 | 1.00 | 0.00 |
| ATOM<br>H | 632 | HZ2 | LYS | X | 43 | 10.258 | -0.327 | -33.605 | 1.00 | 0.00 |
| ATOM<br>H | 633 | HZ3 | LYS | X | 43 | 10.468 | -1.037 | -32.151 | 1.00 | 0.00 |
| ATOM<br>C | 634 | C   | LYS | X | 43 | 11.342 | 1.461  | -27.548 | 1.00 | 0.00 |
| ATOM<br>O | 635 | O   | LYS | X | 43 | 11.621 | 1.090  | -26.370 | 1.00 | 0.00 |
| ATOM<br>N | 636 | N   | GLY | X | 44 | 10.186 | 2.039  | -27.883 | 1.00 | 0.00 |
| ATOM<br>H | 637 | HN  | GLY | X | 44 | 10.096 | 2.369  | -28.820 | 1.00 | 0.00 |
| ATOM<br>C | 638 | CA  | GLY | X | 44 | 9.028  | 2.361  | -27.000 | 1.00 | 0.00 |
| ATOM<br>H | 639 | HA1 | GLY | X | 44 | 8.271  | 2.805  | -27.630 | 1.00 | 0.00 |
| ATOM<br>H | 640 | HA2 | GLY | X | 44 | 9.264  | 3.029  | -26.186 | 1.00 | 0.00 |
| ATOM<br>C | 641 | C   | GLY | X | 44 | 8.409  | 1.127  | -26.318 | 1.00 | 0.00 |
| ATOM<br>O | 642 | O   | GLY | X | 44 | 8.703  | -0.032 | -26.527 | 1.00 | 0.00 |
| ATOM<br>N | 643 | N   | LEU | X | 45 | 7.514  | 1.432  | -25.358 | 1.00 | 0.00 |
| ATOM<br>H | 644 | HN  | LEU | X | 45 | 7.340  | 2.350  | -25.010 | 1.00 | 0.00 |
| ATOM<br>C | 645 | CA  | LEU | X | 45 | 6.909  | 0.313  | -24.575 | 1.00 | 0.00 |
| ATOM<br>H | 646 | HA  | LEU | X | 45 | 7.653  | -0.454 | -24.424 | 1.00 | 0.00 |
| ATOM<br>C | 647 | CB  | LEU | X | 45 | 6.392  | 0.797  | -23.181 | 1.00 | 0.00 |
| ATOM<br>H | 648 | HB1 | LEU | X | 45 | 5.829  | -0.005 | -22.659 | 1.00 | 0.00 |
| ATOM<br>H | 649 | HB2 | LEU | X | 45 | 5.695  | 1.649  | -23.333 | 1.00 | 0.00 |
| ATOM<br>C | 650 | CG  | LEU | X | 45 | 7.526  | 1.257  | -22.319 | 1.00 | 0.00 |

|           |     |      |     |   |    |       |        |         |      |      |
|-----------|-----|------|-----|---|----|-------|--------|---------|------|------|
| ATOM<br>H | 651 | HG   | LEU | X | 45 | 8.493 | 0.876  | -22.711 | 1.00 | 0.00 |
| ATOM<br>C | 652 | CD1  | LEU | X | 45 | 7.445 | 2.779  | -22.213 | 1.00 | 0.00 |
| ATOM<br>H | 653 | HD11 | LEU | X | 45 | 6.431 | 2.966  | -21.799 | 1.00 | 0.00 |
| ATOM<br>H | 654 | HD12 | LEU | X | 45 | 7.561 | 3.388  | -23.135 | 1.00 | 0.00 |
| ATOM<br>H | 655 | HD13 | LEU | X | 45 | 8.247 | 3.205  | -21.573 | 1.00 | 0.00 |
| ATOM<br>C | 656 | CD2  | LEU | X | 45 | 7.511 | 0.622  | -20.913 | 1.00 | 0.00 |
| ATOM<br>H | 657 | HD21 | LEU | X | 45 | 7.831 | -0.442 | -20.872 | 1.00 | 0.00 |
| ATOM<br>H | 658 | HD22 | LEU | X | 45 | 6.481 | 0.601  | -20.497 | 1.00 | 0.00 |
| ATOM<br>H | 659 | HD23 | LEU | X | 45 | 8.147 | 1.210  | -20.217 | 1.00 | 0.00 |
| ATOM<br>C | 660 | C    | LEU | X | 45 | 5.764 | -0.371 | -25.385 | 1.00 | 0.00 |
| ATOM<br>O | 661 | O    | LEU | X | 45 | 5.156 | 0.200  | -26.341 | 1.00 | 0.00 |
| ATOM<br>N | 662 | N    | GLU | X | 46 | 5.514 | -1.660 | -25.057 | 1.00 | 0.00 |
| ATOM<br>H | 663 | HN   | GLU | X | 46 | 6.050 | -2.217 | -24.427 | 1.00 | 0.00 |
| ATOM<br>C | 664 | CA   | GLU | X | 46 | 4.414 | -2.435 | -25.699 | 1.00 | 0.00 |
| ATOM<br>H | 665 | HA   | GLU | X | 46 | 3.688 | -1.798 | -26.183 | 1.00 | 0.00 |
| ATOM<br>C | 666 | CB   | GLU | X | 46 | 4.923 | -3.399 | -26.786 | 1.00 | 0.00 |
| ATOM<br>H | 667 | HB1  | GLU | X | 46 | 4.053 | -4.031 | -27.065 | 1.00 | 0.00 |
| ATOM<br>H | 668 | HB2  | GLU | X | 46 | 5.666 | -4.012 | -26.232 | 1.00 | 0.00 |
| ATOM<br>C | 669 | CG   | GLU | X | 46 | 5.320 | -2.567 | -28.050 | 1.00 | 0.00 |
| ATOM<br>H | 670 | HG1  | GLU | X | 46 | 6.099 | -1.811 | -27.816 | 1.00 | 0.00 |
| ATOM<br>H | 671 | HG2  | GLU | X | 46 | 4.488 | -1.941 | -28.437 | 1.00 | 0.00 |
| ATOM<br>C | 672 | CD   | GLU | X | 46 | 5.807 | -3.500 | -29.030 | 1.00 | 0.00 |
| ATOM<br>O | 673 | OE1  | GLU | X | 46 | 5.372 | -3.496 | -30.201 | 1.00 | 0.00 |
| ATOM<br>O | 674 | OE2  | GLU | X | 46 | 6.606 | -4.348 | -28.669 | 1.00 | 0.00 |
| ATOM<br>C | 675 | C    | GLU | X | 46 | 3.688 | -3.282 | -24.677 | 1.00 | 0.00 |

|           |     |     |     |   |    |        |        |         |      |      |
|-----------|-----|-----|-----|---|----|--------|--------|---------|------|------|
| ATOM<br>O | 676 | O   | GLU | X | 46 | 4.306  | -3.916 | -23.792 | 1.00 | 0.00 |
| ATOM<br>N | 677 | N   | TRP | X | 47 | 2.365  | -3.263 | -24.653 | 1.00 | 0.00 |
| ATOM<br>H | 678 | HN  | TRP | X | 47 | 1.954  | -2.706 | -25.370 | 1.00 | 0.00 |
| ATOM<br>C | 679 | CA  | TRP | X | 47 | 1.541  | -4.176 | -23.819 | 1.00 | 0.00 |
| ATOM<br>H | 680 | HA  | TRP | X | 47 | 1.923  | -4.255 | -22.812 | 1.00 | 0.00 |
| ATOM<br>C | 681 | CB  | TRP | X | 47 | 0.174  | -3.488 | -23.720 | 1.00 | 0.00 |
| ATOM<br>H | 682 | HB1 | TRP | X | 47 | -0.426 | -3.440 | -24.655 | 1.00 | 0.00 |
| ATOM<br>H | 683 | HB2 | TRP | X | 47 | 0.270  | -2.445 | -23.352 | 1.00 | 0.00 |
| ATOM<br>C | 684 | CG  | TRP | X | 47 | -0.792 | -4.192 | -22.793 | 1.00 | 0.00 |
| ATOM<br>C | 685 | CD1 | TRP | X | 47 | -1.143 | -3.734 | -21.600 | 1.00 | 0.00 |
| ATOM<br>H | 686 | HD1 | TRP | X | 47 | -0.656 | -2.917 | -21.089 | 1.00 | 0.00 |
| ATOM<br>N | 687 | NE1 | TRP | X | 47 | -2.264 | -4.447 | -21.112 | 1.00 | 0.00 |
| ATOM<br>H | 688 | HE1 | TRP | X | 47 | -2.815 | -4.028 | -20.424 | 1.00 | 0.00 |
| ATOM<br>C | 689 | CE2 | TRP | X | 47 | -2.667 | -5.319 | -22.058 | 1.00 | 0.00 |
| ATOM<br>C | 690 | CD2 | TRP | X | 47 | -1.723 | -5.253 | -23.129 | 1.00 | 0.00 |
| ATOM<br>C | 691 | CE3 | TRP | X | 47 | -1.897 | -6.054 | -24.228 | 1.00 | 0.00 |
| ATOM<br>H | 692 | HE3 | TRP | X | 47 | -1.228 | -5.942 | -25.068 | 1.00 | 0.00 |
| ATOM<br>C | 693 | CZ3 | TRP | X | 47 | -2.973 | -6.949 | -24.299 | 1.00 | 0.00 |
| ATOM<br>H | 694 | HZ3 | TRP | X | 47 | -3.025 | -7.696 | -25.078 | 1.00 | 0.00 |
| ATOM<br>C | 695 | CZ2 | TRP | X | 47 | -3.844 | -6.029 | -22.257 | 1.00 | 0.00 |
| ATOM<br>H | 696 | HZ2 | TRP | X | 47 | -4.585 | -5.901 | -21.482 | 1.00 | 0.00 |
| ATOM<br>C | 697 | CH2 | TRP | X | 47 | -3.916 | -6.928 | -23.312 | 1.00 | 0.00 |
| ATOM<br>H | 698 | HH2 | TRP | X | 47 | -4.751 | -7.607 | -23.400 | 1.00 | 0.00 |
| ATOM<br>C | 699 | C   | TRP | X | 47 | 1.551  | -5.614 | -24.282 | 1.00 | 0.00 |
| ATOM<br>O | 700 | O   | TRP | X | 47 | 1.377  | -5.989 | -25.472 | 1.00 | 0.00 |



|           |     |      |     |   |    |        |         |         |      |      |
|-----------|-----|------|-----|---|----|--------|---------|---------|------|------|
| ATOM<br>O | 726 | O    | ALA | X | 49 | -1.195 | -8.767  | -19.698 | 1.00 | 0.00 |
| ATOM<br>N | 727 | N    | VAL | X | 50 | -3.199 | -9.507  | -20.358 | 1.00 | 0.00 |
| ATOM<br>H | 728 | HN   | VAL | X | 50 | -3.814 | -9.798  | -21.087 | 1.00 | 0.00 |
| ATOM<br>C | 729 | CA   | VAL | X | 50 | -3.959 | -9.454  | -19.111 | 1.00 | 0.00 |
| ATOM<br>H | 730 | HA   | VAL | X | 50 | -3.341 | -9.178  | -18.269 | 1.00 | 0.00 |
| ATOM<br>C | 731 | CB   | VAL | X | 50 | -5.158 | -8.509  | -19.189 | 1.00 | 0.00 |
| ATOM<br>H | 732 | HB   | VAL | X | 50 | -4.752 | -7.495  | -19.393 | 1.00 | 0.00 |
| ATOM<br>C | 733 | CG1  | VAL | X | 50 | -6.160 | -8.692  | -20.330 | 1.00 | 0.00 |
| ATOM<br>H | 734 | HG11 | VAL | X | 50 | -5.601 | -8.663  | -21.290 | 1.00 | 0.00 |
| ATOM<br>H | 735 | HG12 | VAL | X | 50 | -7.008 | -8.006  | -20.122 | 1.00 | 0.00 |
| ATOM<br>H | 736 | HG13 | VAL | X | 50 | -6.592 | -9.715  | -20.284 | 1.00 | 0.00 |
| ATOM<br>C | 737 | CG2  | VAL | X | 50 | -5.916 | -8.378  | -17.857 | 1.00 | 0.00 |
| ATOM<br>H | 738 | HG21 | VAL | X | 50 | -6.405 | -7.381  | -17.810 | 1.00 | 0.00 |
| ATOM<br>H | 739 | HG22 | VAL | X | 50 | -5.216 | -8.295  | -16.998 | 1.00 | 0.00 |
| ATOM<br>H | 740 | HG23 | VAL | X | 50 | -6.625 | -9.222  | -17.720 | 1.00 | 0.00 |
| ATOM<br>C | 741 | C    | VAL | X | 50 | -4.406 | -10.945 | -18.653 | 1.00 | 0.00 |
| ATOM<br>O | 742 | O    | VAL | X | 50 | -4.934 | -11.765 | -19.371 | 1.00 | 0.00 |
| ATOM<br>N | 743 | N    | ILE | X | 51 | -4.266 | -11.200 | -17.335 | 1.00 | 0.00 |
| ATOM<br>H | 744 | HN   | ILE | X | 51 | -3.778 | -10.613 | -16.694 | 1.00 | 0.00 |
| ATOM<br>C | 745 | CA   | ILE | X | 51 | -5.049 | -12.307 | -16.893 | 1.00 | 0.00 |
| ATOM<br>H | 746 | HA   | ILE | X | 51 | -5.629 | -12.799 | -17.660 | 1.00 | 0.00 |
| ATOM<br>C | 747 | CB   | ILE | X | 51 | -4.161 | -13.522 | -16.406 | 1.00 | 0.00 |
| ATOM<br>H | 748 | HB   | ILE | X | 51 | -3.685 | -13.882 | -17.343 | 1.00 | 0.00 |
| ATOM<br>C | 749 | CG2  | ILE | X | 51 | -3.260 | -13.096 | -15.238 | 1.00 | 0.00 |
| ATOM<br>H | 750 | HG21 | ILE | X | 51 | -3.901 | -12.839 | -14.368 | 1.00 | 0.00 |

|           |     |      |     |   |    |         |         |         |      |      |
|-----------|-----|------|-----|---|----|---------|---------|---------|------|------|
| ATOM<br>H | 751 | HG22 | ILE | X | 51 | -2.556  | -12.266 | -15.463 | 1.00 | 0.00 |
| ATOM<br>H | 752 | HG23 | ILE | X | 51 | -2.559  | -13.930 | -15.022 | 1.00 | 0.00 |
| ATOM<br>C | 753 | CG1  | ILE | X | 51 | -5.044  | -14.680 | -15.940 | 1.00 | 0.00 |
| ATOM<br>H | 754 | HG11 | ILE | X | 51 | -5.724  | -14.425 | -15.099 | 1.00 | 0.00 |
| ATOM<br>H | 755 | HG12 | ILE | X | 51 | -4.328  | -15.448 | -15.576 | 1.00 | 0.00 |
| ATOM<br>C | 756 | CD   | ILE | X | 51 | -5.730  | -15.322 | -17.270 | 1.00 | 0.00 |
| ATOM<br>H | 757 | HD1  | ILE | X | 51 | -6.204  | -16.311 | -17.096 | 1.00 | 0.00 |
| ATOM<br>H | 758 | HD2  | ILE | X | 51 | -4.865  | -15.547 | -17.929 | 1.00 | 0.00 |
| ATOM<br>H | 759 | HD3  | ILE | X | 51 | -6.409  | -14.583 | -17.747 | 1.00 | 0.00 |
| ATOM<br>C | 760 | C    | ILE | X | 51 | -5.946  | -11.623 | -15.851 | 1.00 | 0.00 |
| ATOM<br>O | 761 | O    | ILE | X | 51 | -5.466  | -11.100 | -14.862 | 1.00 | 0.00 |
| ATOM<br>N | 762 | N    | PRO | X | 52 | -7.287  | -11.648 | -16.088 | 1.00 | 0.00 |
| ATOM<br>C | 763 | CD   | PRO | X | 52 | -7.845  | -11.812 | -17.417 | 1.00 | 0.00 |
| ATOM<br>H | 764 | HD1  | PRO | X | 52 | -7.842  | -12.899 | -17.651 | 1.00 | 0.00 |
| ATOM<br>H | 765 | HD2  | PRO | X | 52 | -7.157  | -11.294 | -18.119 | 1.00 | 0.00 |
| ATOM<br>C | 766 | CA   | PRO | X | 52 | -8.269  | -11.225 | -15.171 | 1.00 | 0.00 |
| ATOM<br>H | 767 | HA   | PRO | X | 52 | -8.087  | -10.172 | -15.015 | 1.00 | 0.00 |
| ATOM<br>C | 768 | CB   | PRO | X | 52 | -9.601  | -11.648 | -15.950 | 1.00 | 0.00 |
| ATOM<br>H | 769 | HB1  | PRO | X | 52 | -10.516 | -11.223 | -15.484 | 1.00 | 0.00 |
| ATOM<br>H | 770 | HB2  | PRO | X | 52 | -9.830  | -12.726 | -15.806 | 1.00 | 0.00 |
| ATOM<br>C | 771 | CG   | PRO | X | 52 | -9.284  | -11.247 | -17.348 | 1.00 | 0.00 |
| ATOM<br>H | 772 | HG1  | PRO | X | 52 | -10.007 | -11.756 | -18.021 | 1.00 | 0.00 |
| ATOM<br>H | 773 | HG2  | PRO | X | 52 | -9.302  | -10.170 | -17.621 | 1.00 | 0.00 |
| ATOM<br>C | 774 | C    | PRO | X | 52 | -8.295  | -11.872 | -13.763 | 1.00 | 0.00 |
| ATOM<br>O | 775 | O    | PRO | X | 52 | -7.385  | -12.554 | -13.408 | 1.00 | 0.00 |

|           |     |     |       |    |         |         |         |      |      |
|-----------|-----|-----|-------|----|---------|---------|---------|------|------|
| ATOM<br>N | 776 | N   | PHE X | 53 | -9.273  | -11.437 | -12.873 | 1.00 | 0.00 |
| ATOM<br>H | 777 | HN  | PHE X | 53 | -9.979  | -10.795 | -13.163 | 1.00 | 0.00 |
| ATOM<br>C | 778 | CA  | PHE X | 53 | -9.266  | -11.781 | -11.426 | 1.00 | 0.00 |
| ATOM<br>H | 779 | HA  | PHE X | 53 | -8.423  | -11.263 | -10.993 | 1.00 | 0.00 |
| ATOM<br>C | 780 | CB  | PHE X | 53 | -10.544 | -11.181 | -10.668 | 1.00 | 0.00 |
| ATOM<br>H | 781 | HB1 | PHE X | 53 | -10.257 | -11.067 | -9.601  | 1.00 | 0.00 |
| ATOM<br>H | 782 | HB2 | PHE X | 53 | -11.443 | -11.827 | -10.764 | 1.00 | 0.00 |
| ATOM<br>C | 783 | CG  | PHE X | 53 | -11.002 | -9.812  | -11.143 | 1.00 | 0.00 |
| ATOM<br>C | 784 | CD1 | PHE X | 53 | -10.235 | -8.705  | -10.688 | 1.00 | 0.00 |
| ATOM<br>H | 785 | HD1 | PHE X | 53 | -9.373  | -8.837  | -10.052 | 1.00 | 0.00 |
| ATOM<br>C | 786 | CE1 | PHE X | 53 | -10.515 | -7.367  | -11.059 | 1.00 | 0.00 |
| ATOM<br>H | 787 | HE1 | PHE X | 53 | -9.866  | -6.617  | -10.632 | 1.00 | 0.00 |
| ATOM<br>C | 788 | CZ  | PHE X | 53 | -11.470 | -7.078  | -11.971 | 1.00 | 0.00 |
| ATOM<br>H | 789 | HZ  | PHE X | 53 | -11.706 | -6.051  | -12.210 | 1.00 | 0.00 |
| ATOM<br>C | 790 | CD2 | PHE X | 53 | -12.044 | -9.526  | -12.023 | 1.00 | 0.00 |
| ATOM<br>H | 791 | HD2 | PHE X | 53 | -12.501 | -10.376 | -12.507 | 1.00 | 0.00 |
| ATOM<br>C | 792 | CE2 | PHE X | 53 | -12.326 | -8.266  | -12.467 | 1.00 | 0.00 |
| ATOM<br>H | 793 | HE2 | PHE X | 53 | -13.101 | -7.965  | -13.157 | 1.00 | 0.00 |
| ATOM<br>C | 794 | C   | PHE X | 53 | -9.187  | -13.294 | -11.182 | 1.00 | 0.00 |
| ATOM<br>O | 795 | O   | PHE X | 53 | -8.475  | -13.736 | -10.301 | 1.00 | 0.00 |
| ATOM<br>N | 796 | N   | ASP X | 54 | -9.908  | -14.097 | -11.968 | 1.00 | 0.00 |
| ATOM<br>H | 797 | HN  | ASP X | 54 | -10.510 | -13.705 | -12.659 | 1.00 | 0.00 |
| ATOM<br>C | 798 | CA  | ASP X | 54 | -9.942  | -15.549 | -11.823 | 1.00 | 0.00 |
| ATOM<br>H | 799 | HA  | ASP X | 54 | -9.506  | -15.844 | -10.880 | 1.00 | 0.00 |
| ATOM<br>C | 800 | CB  | ASP X | 54 | -11.379 | -16.126 | -11.858 | 1.00 | 0.00 |





|           |     |      |     |   |    |         |         |         |      |      |
|-----------|-----|------|-----|---|----|---------|---------|---------|------|------|
| ATOM<br>H | 826 | HD1  | ARG | X | 56 | -11.539 | -20.032 | -15.462 | 1.00 | 0.00 |
| ATOM<br>H | 827 | HD2  | ARG | X | 56 | -13.146 | -20.504 | -16.033 | 1.00 | 0.00 |
| ATOM<br>N | 828 | NE   | ARG | X | 56 | -13.144 | -20.281 | -13.912 | 1.00 | 0.00 |
| ATOM<br>H | 829 | HE   | ARG | X | 56 | -13.231 | -19.580 | -13.204 | 1.00 | 0.00 |
| ATOM<br>C | 830 | CZ   | ARG | X | 56 | -12.539 | -21.376 | -13.346 | 1.00 | 0.00 |
| ATOM<br>N | 831 | NH1  | ARG | X | 56 | -12.049 | -21.205 | -12.114 | 1.00 | 0.00 |
| ATOM<br>H | 832 | HH11 | ARG | X | 56 | -12.320 | -20.350 | -11.672 | 1.00 | 0.00 |
| ATOM<br>H | 833 | HH12 | ARG | X | 56 | -11.723 | -21.990 | -11.587 | 1.00 | 0.00 |
| ATOM<br>N | 834 | NH2  | ARG | X | 56 | -12.444 | -22.558 | -13.964 | 1.00 | 0.00 |
| ATOM<br>H | 835 | HH21 | ARG | X | 56 | -12.697 | -22.549 | -14.931 | 1.00 | 0.00 |
| ATOM<br>H | 836 | HH22 | ARG | X | 56 | -12.165 | -23.325 | -13.386 | 1.00 | 0.00 |
| ATOM<br>C | 837 | C    | ARG | X | 56 | -11.161 | -17.292 | -18.810 | 1.00 | 0.00 |
| ATOM<br>O | 838 | O    | ARG | X | 56 | -11.119 | -18.142 | -19.678 | 1.00 | 0.00 |
| ATOM<br>N | 839 | N    | ASN | X | 57 | -11.156 | -15.968 | -19.048 | 1.00 | 0.00 |
| ATOM<br>H | 840 | HN   | ASN | X | 57 | -11.228 | -15.395 | -18.235 | 1.00 | 0.00 |
| ATOM<br>C | 841 | CA   | ASN | X | 57 | -10.806 | -15.326 | -20.309 | 1.00 | 0.00 |
| ATOM<br>H | 842 | HA   | ASN | X | 57 | -10.667 | -16.132 | -21.014 | 1.00 | 0.00 |
| ATOM<br>C | 843 | CB   | ASN | X | 57 | -11.874 | -14.342 | -20.778 | 1.00 | 0.00 |
| ATOM<br>H | 844 | HB1  | ASN | X | 57 | -11.656 | -13.975 | -21.804 | 1.00 | 0.00 |
| ATOM<br>H | 845 | HB2  | ASN | X | 57 | -12.041 | -13.509 | -20.063 | 1.00 | 0.00 |
| ATOM<br>C | 846 | CG   | ASN | X | 57 | -13.250 | -15.014 | -20.949 | 1.00 | 0.00 |
| ATOM<br>O | 847 | OD1  | ASN | X | 57 | -14.234 | -14.441 | -20.539 | 1.00 | 0.00 |
| ATOM<br>N | 848 | ND2  | ASN | X | 57 | -13.362 | -16.216 | -21.521 | 1.00 | 0.00 |
| ATOM<br>H | 849 | HD21 | ASN | X | 57 | -12.521 | -16.732 | -21.677 | 1.00 | 0.00 |
| ATOM<br>H | 850 | HD22 | ASN | X | 57 | -14.274 | -16.318 | -21.920 | 1.00 | 0.00 |

|           |     |     |       |    |        |         |         |      |      |
|-----------|-----|-----|-------|----|--------|---------|---------|------|------|
| ATOM<br>C | 851 | C   | ASN X | 57 | -9.484 | -14.679 | -20.219 | 1.00 | 0.00 |
| ATOM<br>O | 852 | O   | ASN X | 57 | -9.079 | -14.139 | -19.192 | 1.00 | 0.00 |
| ATOM<br>N | 853 | N   | LYS X | 58 | -8.650 | -14.793 | -21.312 | 1.00 | 0.00 |
| ATOM<br>H | 854 | HN  | LYS X | 58 | -9.043 | -15.147 | -22.157 | 1.00 | 0.00 |
| ATOM<br>C | 855 | CA  | LYS X | 58 | -7.262 | -14.348 | -21.299 | 1.00 | 0.00 |
| ATOM<br>H | 856 | HA  | LYS X | 58 | -7.018 | -13.776 | -20.416 | 1.00 | 0.00 |
| ATOM<br>C | 857 | CB  | LYS X | 58 | -6.274 | -15.503 | -21.329 | 1.00 | 0.00 |
| ATOM<br>H | 858 | HB1 | LYS X | 58 | -5.244 | -15.101 | -21.223 | 1.00 | 0.00 |
| ATOM<br>H | 859 | HB2 | LYS X | 58 | -6.179 | -16.077 | -22.275 | 1.00 | 0.00 |
| ATOM<br>C | 860 | CG  | LYS X | 58 | -6.452 | -16.620 | -20.354 | 1.00 | 0.00 |
| ATOM<br>H | 861 | HG1 | LYS X | 58 | -7.386 | -17.181 | -20.568 | 1.00 | 0.00 |
| ATOM<br>H | 862 | HG2 | LYS X | 58 | -6.613 | -16.139 | -19.365 | 1.00 | 0.00 |
| ATOM<br>C | 863 | CD  | LYS X | 58 | -5.255 | -17.636 | -20.271 | 1.00 | 0.00 |
| ATOM<br>H | 864 | HD1 | LYS X | 58 | -4.287 | -17.136 | -20.056 | 1.00 | 0.00 |
| ATOM<br>H | 865 | HD2 | LYS X | 58 | -5.062 | -18.046 | -21.285 | 1.00 | 0.00 |
| ATOM<br>C | 866 | CE  | LYS X | 58 | -5.205 | -18.812 | -19.256 | 1.00 | 0.00 |
| ATOM<br>H | 867 | HE1 | LYS X | 58 | -6.118 | -19.444 | -19.246 | 1.00 | 0.00 |
| ATOM<br>H | 868 | HE2 | LYS X | 58 | -5.101 | -18.483 | -18.200 | 1.00 | 0.00 |
| ATOM<br>N | 869 | NZ  | LYS X | 58 | -4.063 | -19.695 | -19.512 | 1.00 | 0.00 |
| ATOM<br>H | 870 | HZ1 | LYS X | 58 | -4.044 | -20.205 | -20.418 | 1.00 | 0.00 |
| ATOM<br>H | 871 | HZ2 | LYS X | 58 | -3.857 | -20.364 | -18.743 | 1.00 | 0.00 |
| ATOM<br>H | 872 | HZ3 | LYS X | 58 | -3.224 | -19.082 | -19.470 | 1.00 | 0.00 |
| ATOM<br>C | 873 | C   | LYS X | 58 | -6.921 | -13.546 | -22.569 | 1.00 | 0.00 |
| ATOM<br>O | 874 | O   | LYS X | 58 | -7.008 | -13.999 | -23.688 | 1.00 | 0.00 |
| ATOM<br>N | 875 | N   | TYR X | 59 | -6.477 | -12.305 | -22.418 | 1.00 | 0.00 |

|           |     |     |     |   |    |         |         |         |      |      |
|-----------|-----|-----|-----|---|----|---------|---------|---------|------|------|
| ATOM<br>H | 876 | HN  | TYR | X | 59 | -6.447  | -11.824 | -21.545 | 1.00 | 0.00 |
| ATOM<br>C | 877 | CA  | TYR | X | 59 | -6.238  | -11.400 | -23.543 | 1.00 | 0.00 |
| ATOM<br>H | 878 | HA  | TYR | X | 59 | -6.490  | -11.964 | -24.429 | 1.00 | 0.00 |
| ATOM<br>C | 879 | CB  | TYR | X | 59 | -7.151  | -10.156 | -23.640 | 1.00 | 0.00 |
| ATOM<br>H | 880 | HB1 | TYR | X | 59 | -7.050  | -9.696  | -24.646 | 1.00 | 0.00 |
| ATOM<br>H | 881 | HB2 | TYR | X | 59 | -6.816  | -9.340  | -22.965 | 1.00 | 0.00 |
| ATOM<br>C | 882 | CG  | TYR | X | 59 | -8.553  | -10.554 | -23.449 | 1.00 | 0.00 |
| ATOM<br>C | 883 | CD1 | TYR | X | 59 | -9.182  | -10.362 | -22.202 | 1.00 | 0.00 |
| ATOM<br>H | 884 | HD1 | TYR | X | 59 | -8.691  | -9.884  | -21.366 | 1.00 | 0.00 |
| ATOM<br>C | 885 | CE1 | TYR | X | 59 | -10.511 | -10.828 | -22.058 | 1.00 | 0.00 |
| ATOM<br>H | 886 | HE1 | TYR | X | 59 | -11.012 | -10.585 | -21.133 | 1.00 | 0.00 |
| ATOM<br>C | 887 | CZ  | TYR | X | 59 | -11.249 | -11.356 | -23.108 | 1.00 | 0.00 |
| ATOM<br>O | 888 | OH  | TYR | X | 59 | -12.621 | -11.581 | -22.948 | 1.00 | 0.00 |
| ATOM<br>H | 889 | HH  | TYR | X | 59 | -12.973 | -12.365 | -23.376 | 1.00 | 0.00 |
| ATOM<br>C | 890 | CD2 | TYR | X | 59 | -9.244  | -11.099 | -24.485 | 1.00 | 0.00 |
| ATOM<br>H | 891 | HD2 | TYR | X | 59 | -8.651  | -11.362 | -25.348 | 1.00 | 0.00 |
| ATOM<br>C | 892 | CE2 | TYR | X | 59 | -10.592 | -11.487 | -24.335 | 1.00 | 0.00 |
| ATOM<br>H | 893 | HE2 | TYR | X | 59 | -11.048 | -11.960 | -25.192 | 1.00 | 0.00 |
| ATOM<br>C | 894 | C   | TYR | X | 59 | -4.806  | -11.148 | -23.639 | 1.00 | 0.00 |
| ATOM<br>O | 895 | O   | TYR | X | 59 | -4.177  | -10.729 | -22.688 | 1.00 | 0.00 |
| ATOM<br>N | 896 | N   | TYR | X | 60 | -4.291  | -11.304 | -24.881 | 1.00 | 0.00 |
| ATOM<br>H | 897 | HN  | TYR | X | 60 | -4.975  | -11.732 | -25.467 | 1.00 | 0.00 |
| ATOM<br>C | 898 | CA  | TYR | X | 60 | -2.965  | -11.205 | -25.352 | 1.00 | 0.00 |
| ATOM<br>H | 899 | HA  | TYR | X | 60 | -2.427  | -10.918 | -24.460 | 1.00 | 0.00 |
| ATOM<br>C | 900 | CB  | TYR | X | 60 | -2.447  | -12.646 | -26.011 | 1.00 | 0.00 |

|           |     |     |     |   |    |        |         |         |      |      |
|-----------|-----|-----|-----|---|----|--------|---------|---------|------|------|
| ATOM<br>H | 901 | HB1 | TYR | X | 60 | -1.420 | -12.490 | -26.406 | 1.00 | 0.00 |
| ATOM<br>H | 902 | HB2 | TYR | X | 60 | -3.058 | -13.016 | -26.862 | 1.00 | 0.00 |
| ATOM<br>C | 903 | CG  | TYR | X | 60 | -2.472 | -13.868 | -25.107 | 1.00 | 0.00 |
| ATOM<br>C | 904 | CD1 | TYR | X | 60 | -3.622 | -14.604 | -24.904 | 1.00 | 0.00 |
| ATOM<br>H | 905 | HD1 | TYR | X | 60 | -4.514 | -14.363 | -25.463 | 1.00 | 0.00 |
| ATOM<br>C | 906 | CE1 | TYR | X | 60 | -3.661 | -15.699 | -24.074 | 1.00 | 0.00 |
| ATOM<br>H | 907 | HE1 | TYR | X | 60 | -4.621 | -16.159 | -23.896 | 1.00 | 0.00 |
| ATOM<br>C | 908 | CZ  | TYR | X | 60 | -2.513 | -16.053 | -23.339 | 1.00 | 0.00 |
| ATOM<br>O | 909 | OH  | TYR | X | 60 | -2.661 | -17.243 | -22.569 | 1.00 | 0.00 |
| ATOM<br>H | 910 | HH  | TYR | X | 60 | -3.396 | -17.694 | -22.991 | 1.00 | 0.00 |
| ATOM<br>C | 911 | CD2 | TYR | X | 60 | -1.278 | -14.333 | -24.495 | 1.00 | 0.00 |
| ATOM<br>H | 912 | HD2 | TYR | X | 60 | -0.317 | -13.894 | -24.716 | 1.00 | 0.00 |
| ATOM<br>C | 913 | CE2 | TYR | X | 60 | -1.318 | -15.440 | -23.585 | 1.00 | 0.00 |
| ATOM<br>H | 914 | HE2 | TYR | X | 60 | -0.362 | -15.693 | -23.150 | 1.00 | 0.00 |
| ATOM<br>C | 915 | C   | TYR | X | 60 | -2.836 | -10.111 | -26.544 | 1.00 | 0.00 |
| ATOM<br>O | 916 | O   | TYR | X | 60 | -3.768 | -9.904  | -27.287 | 1.00 | 0.00 |
| ATOM<br>N | 917 | N   | ALA | X | 61 | -1.694 | -9.477  | -26.691 | 1.00 | 0.00 |
| ATOM<br>H | 918 | HN  | ALA | X | 61 | -0.951 | -9.671  | -26.055 | 1.00 | 0.00 |
| ATOM<br>C | 919 | CA  | ALA | X | 61 | -1.334 | -8.784  | -27.934 | 1.00 | 0.00 |
| ATOM<br>H | 920 | HA  | ALA | X | 61 | -2.190 | -8.178  | -28.191 | 1.00 | 0.00 |
| ATOM<br>C | 921 | CB  | ALA | X | 61 | -0.096 | -7.811  | -27.708 | 1.00 | 0.00 |
| ATOM<br>H | 922 | HB1 | ALA | X | 61 | 0.169  | -7.380  | -28.697 | 1.00 | 0.00 |
| ATOM<br>H | 923 | HB2 | ALA | X | 61 | 0.649  | -8.398  | -27.129 | 1.00 | 0.00 |
| ATOM<br>H | 924 | HB3 | ALA | X | 61 | -0.511 | -6.920  | -27.189 | 1.00 | 0.00 |
| ATOM<br>C | 925 | C   | ALA | X | 61 | -1.086 | -9.774  | -29.098 | 1.00 | 0.00 |

|           |     |     |     |   |    |        |         |         |      |      |
|-----------|-----|-----|-----|---|----|--------|---------|---------|------|------|
| ATOM<br>O | 926 | O   | ALA | X | 61 | -0.605 | -10.908 | -28.932 | 1.00 | 0.00 |
| ATOM<br>N | 927 | N   | ASP | X | 62 | -1.449 | -9.360  | -30.350 | 1.00 | 0.00 |
| ATOM<br>H | 928 | HN  | ASP | X | 62 | -1.871 | -8.464  | -30.460 | 1.00 | 0.00 |
| ATOM<br>C | 929 | CA  | ASP | X | 62 | -1.425 | -10.166 | -31.523 | 1.00 | 0.00 |
| ATOM<br>H | 930 | HA  | ASP | X | 62 | -2.036 | -11.038 | -31.343 | 1.00 | 0.00 |
| ATOM<br>C | 931 | CB  | ASP | X | 62 | -1.887 | -9.315  | -32.697 | 1.00 | 0.00 |
| ATOM<br>H | 932 | HB1 | ASP | X | 62 | -1.745 | -9.896  | -33.634 | 1.00 | 0.00 |
| ATOM<br>H | 933 | HB2 | ASP | X | 62 | -1.356 | -8.346  | -32.820 | 1.00 | 0.00 |
| ATOM<br>C | 934 | CG  | ASP | X | 62 | -3.417 | -9.047  | -32.672 | 1.00 | 0.00 |
| ATOM<br>O | 935 | OD1 | ASP | X | 62 | -4.218 | -9.506  | -31.817 | 1.00 | 0.00 |
| ATOM<br>O | 936 | OD2 | ASP | X | 62 | -3.830 | -8.448  | -33.687 | 1.00 | 0.00 |
| ATOM<br>C | 937 | C   | ASP | X | 62 | 0.019  | -10.635 | -31.835 | 1.00 | 0.00 |
| ATOM<br>O | 938 | O   | ASP | X | 62 | 0.287  | -11.758 | -32.332 | 1.00 | 0.00 |
| ATOM<br>N | 939 | N   | SER | X | 63 | 1.041  | -9.856  | -31.537 | 1.00 | 0.00 |
| ATOM<br>H | 940 | HN  | SER | X | 63 | 0.891  | -8.910  | -31.263 | 1.00 | 0.00 |
| ATOM<br>C | 941 | CA  | SER | X | 63 | 2.387  | -10.334 | -31.792 | 1.00 | 0.00 |
| ATOM<br>H | 942 | HA  | SER | X | 63 | 2.359  | -10.630 | -32.830 | 1.00 | 0.00 |
| ATOM<br>C | 943 | CB  | SER | X | 63 | 3.458  | -9.167  | -31.776 | 1.00 | 0.00 |
| ATOM<br>H | 944 | HB1 | SER | X | 63 | 4.435  | -9.618  | -32.052 | 1.00 | 0.00 |
| ATOM<br>H | 945 | HB2 | SER | X | 63 | 3.585  | -8.785  | -30.741 | 1.00 | 0.00 |
| ATOM<br>O | 946 | OG  | SER | X | 63 | 3.150  | -8.102  | -32.626 | 1.00 | 0.00 |
| ATOM<br>H | 947 | HG1 | SER | X | 63 | 2.459  | -7.643  | -32.144 | 1.00 | 0.00 |
| ATOM<br>C | 948 | C   | SER | X | 63 | 2.933  | -11.449 | -30.893 | 1.00 | 0.00 |
| ATOM<br>O | 949 | O   | SER | X | 63 | 3.981  | -12.034 | -31.216 | 1.00 | 0.00 |
| ATOM<br>N | 950 | N   | VAL | X | 64 | 2.262  | -11.775 | -29.761 | 1.00 | 0.00 |

|           |     |      |       |    |        |         |         |      |      |
|-----------|-----|------|-------|----|--------|---------|---------|------|------|
| ATOM<br>H | 951 | HN   | VAL X | 64 | 1.306  | -11.536 | -29.611 | 1.00 | 0.00 |
| ATOM<br>C | 952 | CA   | VAL X | 64 | 2.860  | -12.593 | -28.744 | 1.00 | 0.00 |
| ATOM<br>H | 953 | HA   | VAL X | 64 | 3.841  | -12.949 | -29.022 | 1.00 | 0.00 |
| ATOM<br>C | 954 | CB   | VAL X | 64 | 3.100  | -11.788 | -27.411 | 1.00 | 0.00 |
| ATOM<br>H | 955 | HB   | VAL X | 64 | 3.313  | -12.592 | -26.675 | 1.00 | 0.00 |
| ATOM<br>C | 956 | CG1  | VAL X | 64 | 4.270  | -10.930 | -27.407 | 1.00 | 0.00 |
| ATOM<br>H | 957 | HG11 | VAL X | 64 | 4.395  | -10.355 | -26.464 | 1.00 | 0.00 |
| ATOM<br>H | 958 | HG12 | VAL X | 64 | 4.132  | -10.230 | -28.259 | 1.00 | 0.00 |
| ATOM<br>H | 959 | HG13 | VAL X | 64 | 5.257  | -11.430 | -27.514 | 1.00 | 0.00 |
| ATOM<br>C | 960 | CG2  | VAL X | 64 | 1.906  | -11.001 | -27.127 | 1.00 | 0.00 |
| ATOM<br>H | 961 | HG21 | VAL X | 64 | 1.110  | -11.765 | -26.999 | 1.00 | 0.00 |
| ATOM<br>H | 962 | HG22 | VAL X | 64 | 1.527  | -10.266 | -27.869 | 1.00 | 0.00 |
| ATOM<br>H | 963 | HG23 | VAL X | 64 | 2.146  | -10.507 | -26.161 | 1.00 | 0.00 |
| ATOM<br>C | 964 | C    | VAL X | 64 | 2.024  | -13.892 | -28.458 | 1.00 | 0.00 |
| ATOM<br>O | 965 | O    | VAL X | 64 | 2.453  | -14.826 | -27.808 | 1.00 | 0.00 |
| ATOM<br>N | 966 | N    | THR X | 65 | 0.817  | -13.986 | -29.059 | 1.00 | 0.00 |
| ATOM<br>H | 967 | HN   | THR X | 65 | 0.615  | -13.296 | -29.749 | 1.00 | 0.00 |
| ATOM<br>C | 968 | CA   | THR X | 65 | -0.082 | -15.093 | -29.145 | 1.00 | 0.00 |
| ATOM<br>H | 969 | HA   | THR X | 65 | -0.448 | -15.108 | -28.129 | 1.00 | 0.00 |
| ATOM<br>C | 970 | CB   | THR X | 65 | -1.206 | -14.796 | -30.129 | 1.00 | 0.00 |
| ATOM<br>H | 971 | HB   | THR X | 65 | -1.701 | -15.698 | -30.549 | 1.00 | 0.00 |
| ATOM<br>O | 972 | OG1  | THR X | 65 | -0.607 | -14.234 | -31.313 | 1.00 | 0.00 |
| ATOM<br>H | 973 | HG1  | THR X | 65 | -1.318 | -14.250 | -31.959 | 1.00 | 0.00 |
| ATOM<br>C | 974 | CG2  | THR X | 65 | -2.239 | -13.873 | -29.477 | 1.00 | 0.00 |
| ATOM<br>H | 975 | HG21 | THR X | 65 | -2.896 | -13.497 | -30.290 | 1.00 | 0.00 |





|           |      |      |     |   |    |        |         |         |      |      |
|-----------|------|------|-----|---|----|--------|---------|---------|------|------|
| ATOM<br>H | 1001 | HE   | ARG | X | 67 | 6.608  | -15.510 | -30.926 | 1.00 | 0.00 |
| ATOM<br>C | 1002 | CZ   | ARG | X | 67 | 8.490  | -15.372 | -30.260 | 1.00 | 0.00 |
| ATOM<br>N | 1003 | NH1  | ARG | X | 67 | 9.587  | -15.950 | -29.748 | 1.00 | 0.00 |
| ATOM<br>H | 1004 | HH11 | ARG | X | 67 | 9.600  | -16.947 | -29.679 | 1.00 | 0.00 |
| ATOM<br>H | 1005 | HH12 | ARG | X | 67 | 10.445 | -15.441 | -29.683 | 1.00 | 0.00 |
| ATOM<br>N | 1006 | NH2  | ARG | X | 67 | 8.560  | -14.089 | -30.603 | 1.00 | 0.00 |
| ATOM<br>H | 1007 | HH21 | ARG | X | 67 | 7.661  | -13.661 | -30.699 | 1.00 | 0.00 |
| ATOM<br>H | 1008 | HH22 | ARG | X | 67 | 9.330  | -13.539 | -30.281 | 1.00 | 0.00 |
| ATOM<br>C | 1009 | C    | ARG | X | 67 | 4.198  | -18.233 | -26.337 | 1.00 | 0.00 |
| ATOM<br>O | 1010 | O    | ARG | X | 67 | 4.910  | -18.888 | -25.598 | 1.00 | 0.00 |
| ATOM<br>N | 1011 | N    | PHE | X | 68 | 3.315  | -17.256 | -25.863 | 1.00 | 0.00 |
| ATOM<br>H | 1012 | HN   | PHE | X | 68 | 2.835  | -16.647 | -26.490 | 1.00 | 0.00 |
| ATOM<br>C | 1013 | CA   | PHE | X | 68 | 2.974  | -17.152 | -24.505 | 1.00 | 0.00 |
| ATOM<br>H | 1014 | HA   | PHE | X | 68 | 3.796  | -17.578 | -23.949 | 1.00 | 0.00 |
| ATOM<br>C | 1015 | CB   | PHE | X | 68 | 2.868  | -15.618 | -24.108 | 1.00 | 0.00 |
| ATOM<br>H | 1016 | HB1  | PHE | X | 68 | 2.733  | -15.694 | -23.008 | 1.00 | 0.00 |
| ATOM<br>H | 1017 | HB2  | PHE | X | 68 | 2.141  | -15.019 | -24.698 | 1.00 | 0.00 |
| ATOM<br>C | 1018 | CG   | PHE | X | 68 | 4.107  | -14.712 | -24.296 | 1.00 | 0.00 |
| ATOM<br>C | 1019 | CD1  | PHE | X | 68 | 5.363  | -15.172 | -24.815 | 1.00 | 0.00 |
| ATOM<br>H | 1020 | HD1  | PHE | X | 68 | 5.498  | -16.174 | -25.195 | 1.00 | 0.00 |
| ATOM<br>C | 1021 | CE1  | PHE | X | 68 | 6.454  | -14.290 | -25.034 | 1.00 | 0.00 |
| ATOM<br>H | 1022 | HE1  | PHE | X | 68 | 7.330  | -14.617 | -25.574 | 1.00 | 0.00 |
| ATOM<br>C | 1023 | CZ   | PHE | X | 68 | 6.235  | -12.903 | -24.951 | 1.00 | 0.00 |
| ATOM<br>H | 1024 | HZ   | PHE | X | 68 | 7.021  | -12.227 | -25.255 | 1.00 | 0.00 |
| ATOM<br>C | 1025 | CD2  | PHE | X | 68 | 4.006  | -13.321 | -24.078 | 1.00 | 0.00 |









|           |      |     |     |   |    |        |         |        |      |      |
|-----------|------|-----|-----|---|----|--------|---------|--------|------|------|
| ATOM<br>H | 1126 | HN  | SER | X | 75 | -3.488 | -18.793 | -5.478 | 1.00 | 0.00 |
| ATOM<br>C | 1127 | CA  | SER | X | 75 | -3.692 | -18.890 | -3.322 | 1.00 | 0.00 |
| ATOM<br>H | 1128 | HA  | SER | X | 75 | -4.405 | -18.460 | -2.634 | 1.00 | 0.00 |
| ATOM<br>C | 1129 | CB  | SER | X | 75 | -3.753 | -20.440 | -3.279 | 1.00 | 0.00 |
| ATOM<br>H | 1130 | HB1 | SER | X | 75 | -3.424 | -20.742 | -2.261 | 1.00 | 0.00 |
| ATOM<br>H | 1131 | HB2 | SER | X | 75 | -3.189 | -20.974 | -4.072 | 1.00 | 0.00 |
| ATOM<br>O | 1132 | OG  | SER | X | 75 | -5.162 | -20.835 | -3.422 | 1.00 | 0.00 |
| ATOM<br>H | 1133 | HG1 | SER | X | 75 | -5.249 | -21.790 | -3.372 | 1.00 | 0.00 |
| ATOM<br>C | 1134 | C   | SER | X | 75 | -2.300 | -18.482 | -2.830 | 1.00 | 0.00 |
| ATOM<br>O | 1135 | O   | SER | X | 75 | -2.186 | -18.013 | -1.709 | 1.00 | 0.00 |
| ATOM<br>N | 1136 | N   | LYS | X | 76 | -1.268 | -18.723 | -3.675 | 1.00 | 0.00 |
| ATOM<br>H | 1137 | HN  | LYS | X | 76 | -1.488 | -19.177 | -4.535 | 1.00 | 0.00 |
| ATOM<br>C | 1138 | CA  | LYS | X | 76 | 0.070  | -18.270 | -3.374 | 1.00 | 0.00 |
| ATOM<br>H | 1139 | HA  | LYS | X | 76 | 0.252  | -18.250 | -2.310 | 1.00 | 0.00 |
| ATOM<br>C | 1140 | CB  | LYS | X | 76 | 1.183  | -19.188 | -3.893 | 1.00 | 0.00 |
| ATOM<br>H | 1141 | HB1 | LYS | X | 76 | 2.180  | -18.699 | -3.918 | 1.00 | 0.00 |
| ATOM<br>H | 1142 | HB2 | LYS | X | 76 | 1.052  | -19.427 | -4.970 | 1.00 | 0.00 |
| ATOM<br>C | 1143 | CG  | LYS | X | 76 | 1.325  | -20.458 | -3.134 | 1.00 | 0.00 |
| ATOM<br>H | 1144 | HG1 | LYS | X | 76 | 1.429  | -20.185 | -2.062 | 1.00 | 0.00 |
| ATOM<br>H | 1145 | HG2 | LYS | X | 76 | 2.214  | -21.060 | -3.424 | 1.00 | 0.00 |
| ATOM<br>C | 1146 | CD  | LYS | X | 76 | 0.170  | -21.367 | -3.263 | 1.00 | 0.00 |
| ATOM<br>H | 1147 | HD1 | LYS | X | 76 | -0.099 | -21.372 | -4.341 | 1.00 | 0.00 |
| ATOM<br>H | 1148 | HD2 | LYS | X | 76 | -0.592 | -20.853 | -2.639 | 1.00 | 0.00 |
| ATOM<br>C | 1149 | CE  | LYS | X | 76 | 0.410  | -22.888 | -2.888 | 1.00 | 0.00 |
| ATOM<br>H | 1150 | HE1 | LYS | X | 76 | 0.628  | -22.963 | -1.801 | 1.00 | 0.00 |



|           |      |      |       |    |        |         |         |      |      |
|-----------|------|------|-------|----|--------|---------|---------|------|------|
| ATOM<br>C | 1176 | CB   | THR X | 78 | 2.619  | -15.951 | -7.655  | 1.00 | 0.00 |
| ATOM<br>H | 1177 | HB   | THR X | 78 | 2.149  | -16.886 | -8.030  | 1.00 | 0.00 |
| ATOM<br>O | 1178 | OG1  | THR X | 78 | 3.076  | -16.013 | -6.339  | 1.00 | 0.00 |
| ATOM<br>H | 1179 | HG1  | THR X | 78 | 2.426  | -15.596 | -5.769  | 1.00 | 0.00 |
| ATOM<br>C | 1180 | CG2  | THR X | 78 | 3.914  | -15.676 | -8.464  | 1.00 | 0.00 |
| ATOM<br>H | 1181 | HG21 | THR X | 78 | 4.457  | -14.782 | -8.089  | 1.00 | 0.00 |
| ATOM<br>H | 1182 | HG22 | THR X | 78 | 3.702  | -15.412 | -9.522  | 1.00 | 0.00 |
| ATOM<br>H | 1183 | HG23 | THR X | 78 | 4.626  | -16.529 | -8.462  | 1.00 | 0.00 |
| ATOM<br>C | 1184 | C    | THR X | 78 | 1.039  | -14.863 | -9.319  | 1.00 | 0.00 |
| ATOM<br>O | 1185 | O    | THR X | 78 | 0.038  | -15.490 | -9.695  | 1.00 | 0.00 |
| ATOM<br>N | 1186 | N    | LEU X | 79 | 1.628  | -14.106 | -10.266 | 1.00 | 0.00 |
| ATOM<br>H | 1187 | HN   | LEU X | 79 | 2.330  | -13.516 | -9.873  | 1.00 | 0.00 |
| ATOM<br>C | 1188 | CA   | LEU X | 79 | 1.273  | -14.038 | -11.688 | 1.00 | 0.00 |
| ATOM<br>H | 1189 | HA   | LEU X | 79 | 0.353  | -14.527 | -11.974 | 1.00 | 0.00 |
| ATOM<br>C | 1190 | CB   | LEU X | 79 | 1.293  | -12.600 | -12.196 | 1.00 | 0.00 |
| ATOM<br>H | 1191 | HB1  | LEU X | 79 | 2.086  | -12.012 | -11.686 | 1.00 | 0.00 |
| ATOM<br>H | 1192 | HB2  | LEU X | 79 | 0.456  | -12.047 | -11.718 | 1.00 | 0.00 |
| ATOM<br>C | 1193 | CG   | LEU X | 79 | 1.348  | -12.267 | -13.706 | 1.00 | 0.00 |
| ATOM<br>H | 1194 | HG   | LEU X | 79 | 2.328  | -12.581 | -14.125 | 1.00 | 0.00 |
| ATOM<br>C | 1195 | CD1  | LEU X | 79 | 0.248  | -12.893 | -14.465 | 1.00 | 0.00 |
| ATOM<br>H | 1196 | HD11 | LEU X | 79 | 0.323  | -13.981 | -14.674 | 1.00 | 0.00 |
| ATOM<br>H | 1197 | HD12 | LEU X | 79 | 0.147  | -12.406 | -15.459 | 1.00 | 0.00 |
| ATOM<br>H | 1198 | HD13 | LEU X | 79 | -0.735 | -12.805 | -13.956 | 1.00 | 0.00 |
| ATOM<br>C | 1199 | CD2  | LEU X | 79 | 1.381  | -10.734 | -13.895 | 1.00 | 0.00 |
| ATOM<br>H | 1200 | HD21 | LEU X | 79 | 0.467  | -10.335 | -13.405 | 1.00 | 0.00 |



|           |      |      |     |   |    |       |         |         |      |      |
|-----------|------|------|-----|---|----|-------|---------|---------|------|------|
| ATOM<br>H | 1201 | HD22 | LEU | X | 79 | 1.390 | -10.355 | -14.939 | 1.00 | 0.00 |
| ATOM<br>H | 1202 | HD23 | LEU | X | 79 | 2.241 | -10.216 | -13.418 | 1.00 | 0.00 |
| ATOM<br>C | 1203 | C    | LEU | X | 79 | 2.337 | -14.717 | -12.491 | 1.00 | 0.00 |
| ATOM<br>O | 1204 | O    | LEU | X | 79 | 3.511 | -14.472 | -12.205 | 1.00 | 0.00 |
| ATOM<br>N | 1205 | N    | TYR | X | 80 | 2.048 | -15.621 | -13.456 | 1.00 | 0.00 |
| ATOM<br>H | 1206 | HN   | TYR | X | 80 | 1.088 | -15.874 | -13.548 | 1.00 | 0.00 |
| ATOM<br>C | 1207 | CA   | TYR | X | 80 | 2.941 | -16.332 | -14.340 | 1.00 | 0.00 |
| ATOM<br>H | 1208 | HA   | TYR | X | 80 | 3.896 | -15.946 | -14.016 | 1.00 | 0.00 |
| ATOM<br>C | 1209 | CB   | TYR | X | 80 | 2.817 | -17.743 | -14.171 | 1.00 | 0.00 |
| ATOM<br>H | 1210 | HB1  | TYR | X | 80 | 3.699 | -18.206 | -14.664 | 1.00 | 0.00 |
| ATOM<br>H | 1211 | HB2  | TYR | X | 80 | 1.877 | -18.166 | -14.587 | 1.00 | 0.00 |
| ATOM<br>C | 1212 | CG   | TYR | X | 80 | 3.017 | -18.104 | -12.715 | 1.00 | 0.00 |
| ATOM<br>C | 1213 | CD1  | TYR | X | 80 | 4.259 | -18.464 | -12.295 | 1.00 | 0.00 |
| ATOM<br>H | 1214 | HD1  | TYR | X | 80 | 5.079 | -18.344 | -12.988 | 1.00 | 0.00 |
| ATOM<br>C | 1215 | CE1  | TYR | X | 80 | 4.429 | -18.996 | -10.961 | 1.00 | 0.00 |
| ATOM<br>H | 1216 | HE1  | TYR | X | 80 | 5.374 | -19.181 | -10.472 | 1.00 | 0.00 |
| ATOM<br>C | 1217 | CZ   | TYR | X | 80 | 3.308 | -19.210 | -10.090 | 1.00 | 0.00 |
| ATOM<br>O | 1218 | OH   | TYR | X | 80 | 3.497 | -19.817 | -8.823  | 1.00 | 0.00 |
| ATOM<br>H | 1219 | HH   | TYR | X | 80 | 4.443 | -19.980 | -8.822  | 1.00 | 0.00 |
| ATOM<br>C | 1220 | CD2  | TYR | X | 80 | 1.931 | -18.366 | -11.852 | 1.00 | 0.00 |
| ATOM<br>H | 1221 | HD2  | TYR | X | 80 | 0.987 | -18.311 | -12.373 | 1.00 | 0.00 |
| ATOM<br>C | 1222 | CE2  | TYR | X | 80 | 2.060 | -18.835 | -10.582 | 1.00 | 0.00 |
| ATOM<br>H | 1223 | HE2  | TYR | X | 80 | 1.196 | -19.004 | -9.957  | 1.00 | 0.00 |
| ATOM<br>C | 1224 | C    | TYR | X | 80 | 2.772 | -16.034 | -15.789 | 1.00 | 0.00 |
| ATOM<br>O | 1225 | O    | TYR | X | 80 | 1.620 | -16.052 | -16.222 | 1.00 | 0.00 |

|           |      |      |       |    |       |         |         |      |      |
|-----------|------|------|-------|----|-------|---------|---------|------|------|
| ATOM<br>N | 1226 | N    | LEU X | 81 | 3.896 | -15.831 | -16.556 | 1.00 | 0.00 |
| ATOM<br>H | 1227 | HN   | LEU X | 81 | 4.749 | -15.834 | -16.041 | 1.00 | 0.00 |
| ATOM<br>C | 1228 | CA   | LEU X | 81 | 3.976 | -15.742 | -17.968 | 1.00 | 0.00 |
| ATOM<br>H | 1229 | HA   | LEU X | 81 | 3.008 | -15.992 | -18.376 | 1.00 | 0.00 |
| ATOM<br>C | 1230 | CB   | LEU X | 81 | 4.488 | -14.338 | -18.461 | 1.00 | 0.00 |
| ATOM<br>H | 1231 | HB1  | LEU X | 81 | 5.422 | -13.997 | -17.966 | 1.00 | 0.00 |
| ATOM<br>H | 1232 | HB2  | LEU X | 81 | 3.618 | -13.710 | -18.174 | 1.00 | 0.00 |
| ATOM<br>C | 1233 | CG   | LEU X | 81 | 4.576 | -14.156 | -19.984 | 1.00 | 0.00 |
| ATOM<br>H | 1234 | HG   | LEU X | 81 | 5.401 | -14.643 | -20.548 | 1.00 | 0.00 |
| ATOM<br>C | 1235 | CD1  | LEU X | 81 | 3.285 | -14.544 | -20.650 | 1.00 | 0.00 |
| ATOM<br>H | 1236 | HD11 | LEU X | 81 | 2.478 | -14.181 | -19.978 | 1.00 | 0.00 |
| ATOM<br>H | 1237 | HD12 | LEU X | 81 | 3.189 | -15.648 | -20.735 | 1.00 | 0.00 |
| ATOM<br>H | 1238 | HD13 | LEU X | 81 | 3.153 | -14.037 | -21.630 | 1.00 | 0.00 |
| ATOM<br>C | 1239 | CD2  | LEU X | 81 | 4.750 | -12.632 | -20.186 | 1.00 | 0.00 |
| ATOM<br>H | 1240 | HD21 | LEU X | 81 | 3.909 | -11.980 | -19.866 | 1.00 | 0.00 |
| ATOM<br>H | 1241 | HD22 | LEU X | 81 | 4.726 | -12.500 | -21.289 | 1.00 | 0.00 |
| ATOM<br>H | 1242 | HD23 | LEU X | 81 | 5.617 | -12.149 | -19.686 | 1.00 | 0.00 |
| ATOM<br>C | 1243 | C    | LEU X | 81 | 4.956 | -16.852 | -18.389 | 1.00 | 0.00 |
| ATOM<br>O | 1244 | O    | LEU X | 81 | 6.050 | -16.894 | -17.886 | 1.00 | 0.00 |
| ATOM<br>N | 1245 | N    | GLN X | 82 | 4.568 | -17.867 | -19.248 | 1.00 | 0.00 |
| ATOM<br>H | 1246 | HN   | GLN X | 82 | 3.618 | -17.961 | -19.536 | 1.00 | 0.00 |
| ATOM<br>C | 1247 | CA   | GLN X | 82 | 5.399 | -18.968 | -19.686 | 1.00 | 0.00 |
| ATOM<br>H | 1248 | HA   | GLN X | 82 | 6.373 | -18.831 | -19.240 | 1.00 | 0.00 |
| ATOM<br>C | 1249 | CB   | GLN X | 82 | 4.787 | -20.320 | -19.244 | 1.00 | 0.00 |
| ATOM<br>H | 1250 | HB1  | GLN X | 82 | 3.754 | -20.422 | -19.639 | 1.00 | 0.00 |

|           |      |      |     |   |    |       |         |         |      |      |
|-----------|------|------|-----|---|----|-------|---------|---------|------|------|
| ATOM<br>H | 1251 | HB2  | GLN | X | 82 | 4.788 | -20.315 | -18.133 | 1.00 | 0.00 |
| ATOM<br>C | 1252 | CG   | GLN | X | 82 | 5.662 | -21.607 | -19.575 | 1.00 | 0.00 |
| ATOM<br>H | 1253 | HG1  | GLN | X | 82 | 6.057 | -21.511 | -20.609 | 1.00 | 0.00 |
| ATOM<br>H | 1254 | HG2  | GLN | X | 82 | 4.985 | -22.488 | -19.579 | 1.00 | 0.00 |
| ATOM<br>C | 1255 | CD   | GLN | X | 82 | 6.840 | -21.860 | -18.625 | 1.00 | 0.00 |
| ATOM<br>O | 1256 | OE1  | GLN | X | 82 | 6.821 | -21.352 | -17.495 | 1.00 | 0.00 |
| ATOM<br>N | 1257 | NE2  | GLN | X | 82 | 7.903 | -22.616 | -19.053 | 1.00 | 0.00 |
| ATOM<br>H | 1258 | HE21 | GLN | X | 82 | 8.766 | -22.759 | -18.570 | 1.00 | 0.00 |
| ATOM<br>H | 1259 | HE22 | GLN | X | 82 | 7.822 | -22.867 | -20.018 | 1.00 | 0.00 |
| ATOM<br>C | 1260 | C    | GLN | X | 82 | 5.490 | -18.867 | -21.208 | 1.00 | 0.00 |
| ATOM<br>O | 1261 | O    | GLN | X | 82 | 4.575 | -19.088 | -22.056 | 1.00 | 0.00 |
| ATOM<br>N | 1262 | N    | MET | X | 83 | 6.789 | -18.699 | -21.682 | 1.00 | 0.00 |
| ATOM<br>H | 1263 | HN   | MET | X | 83 | 7.530 | -18.747 | -21.017 | 1.00 | 0.00 |
| ATOM<br>C | 1264 | CA   | MET | X | 83 | 7.079 | -18.362 | -22.985 | 1.00 | 0.00 |
| ATOM<br>H | 1265 | HA   | MET | X | 83 | 6.291 | -18.016 | -23.638 | 1.00 | 0.00 |
| ATOM<br>C | 1266 | CB   | MET | X | 83 | 8.196 | -17.202 | -23.013 | 1.00 | 0.00 |
| ATOM<br>H | 1267 | HB1  | MET | X | 83 | 8.475 | -16.867 | -24.035 | 1.00 | 0.00 |
| ATOM<br>H | 1268 | HB2  | MET | X | 83 | 9.098 | -17.554 | -22.468 | 1.00 | 0.00 |
| ATOM<br>C | 1269 | CG   | MET | X | 83 | 7.822 | -15.974 | -22.065 | 1.00 | 0.00 |
| ATOM<br>H | 1270 | HG1  | MET | X | 83 | 7.908 | -16.407 | -21.045 | 1.00 | 0.00 |
| ATOM<br>H | 1271 | HG2  | MET | X | 83 | 6.747 | -15.735 | -22.212 | 1.00 | 0.00 |
| ATOM<br>S | 1272 | SD   | MET | X | 83 | 8.846 | -14.514 | -22.254 | 1.00 | 0.00 |
| ATOM<br>C | 1273 | CE   | MET | X | 83 | 8.559 | -13.662 | -20.631 | 1.00 | 0.00 |
| ATOM<br>H | 1274 | HE1  | MET | X | 83 | 8.505 | -14.441 | -19.840 | 1.00 | 0.00 |
| ATOM<br>H | 1275 | HE2  | MET | X | 83 | 7.573 | -13.171 | -20.486 | 1.00 | 0.00 |

|           |      |      |     |   |    |        |         |         |      |      |
|-----------|------|------|-----|---|----|--------|---------|---------|------|------|
| ATOM<br>H | 1276 | HE3  | MET | X | 83 | 9.436  | -13.047 | -20.334 | 1.00 | 0.00 |
| ATOM<br>C | 1277 | C    | MET | X | 83 | 7.621  | -19.622 | -23.709 | 1.00 | 0.00 |
| ATOM<br>O | 1278 | O    | MET | X | 83 | 8.368  | -20.249 | -23.037 | 1.00 | 0.00 |
| ATOM<br>N | 1279 | N    | ASN | X | 84 | 7.327  | -19.740 | -24.973 | 1.00 | 0.00 |
| ATOM<br>H | 1280 | HN   | ASN | X | 84 | 6.746  | -19.059 | -25.413 | 1.00 | 0.00 |
| ATOM<br>C | 1281 | CA   | ASN | X | 84 | 7.869  | -20.845 | -25.818 | 1.00 | 0.00 |
| ATOM<br>H | 1282 | HA   | ASN | X | 84 | 8.455  | -21.492 | -25.182 | 1.00 | 0.00 |
| ATOM<br>C | 1283 | CB   | ASN | X | 84 | 6.609  | -21.586 | -26.384 | 1.00 | 0.00 |
| ATOM<br>H | 1284 | HB1  | ASN | X | 84 | 6.988  | -22.303 | -27.142 | 1.00 | 0.00 |
| ATOM<br>H | 1285 | HB2  | ASN | X | 84 | 5.859  | -20.951 | -26.901 | 1.00 | 0.00 |
| ATOM<br>C | 1286 | CG   | ASN | X | 84 | 5.880  | -22.313 | -25.263 | 1.00 | 0.00 |
| ATOM<br>O | 1287 | OD1  | ASN | X | 84 | 6.274  | -23.433 | -24.942 | 1.00 | 0.00 |
| ATOM<br>N | 1288 | ND2  | ASN | X | 84 | 4.923  | -21.636 | -24.511 | 1.00 | 0.00 |
| ATOM<br>H | 1289 | HD21 | ASN | X | 84 | 4.812  | -20.650 | -24.630 | 1.00 | 0.00 |
| ATOM<br>H | 1290 | HD22 | ASN | X | 84 | 4.616  | -22.024 | -23.642 | 1.00 | 0.00 |
| ATOM<br>C | 1291 | C    | ASN | X | 84 | 8.694  | -20.275 | -26.968 | 1.00 | 0.00 |
| ATOM<br>O | 1292 | O    | ASN | X | 84 | 8.478  | -19.110 | -27.369 | 1.00 | 0.00 |
| ATOM<br>N | 1293 | N    | SER | X | 85 | 9.701  | -21.102 | -27.419 | 1.00 | 0.00 |
| ATOM<br>H | 1294 | HN   | SER | X | 85 | 9.671  | -22.048 | -27.104 | 1.00 | 0.00 |
| ATOM<br>C | 1295 | CA   | SER | X | 85 | 10.647 | -20.773 | -28.465 | 1.00 | 0.00 |
| ATOM<br>H | 1296 | HA   | SER | X | 85 | 11.523 | -21.390 | -28.323 | 1.00 | 0.00 |
| ATOM<br>C | 1297 | CB   | SER | X | 85 | 10.127 | -21.312 | -29.798 | 1.00 | 0.00 |
| ATOM<br>H | 1298 | HB1  | SER | X | 85 | 10.689 | -20.831 | -30.627 | 1.00 | 0.00 |
| ATOM<br>H | 1299 | HB2  | SER | X | 85 | 9.061  | -21.042 | -29.957 | 1.00 | 0.00 |
| ATOM<br>O | 1300 | OG   | SER | X | 85 | 10.294 | -22.715 | -29.928 | 1.00 | 0.00 |

|           |      |      |     |   |    |        |         |         |      |      |
|-----------|------|------|-----|---|----|--------|---------|---------|------|------|
| ATOM<br>H | 1301 | HG1  | SER | X | 85 | 9.887  | -22.930 | -30.770 | 1.00 | 0.00 |
| ATOM<br>C | 1302 | C    | SER | X | 85 | 11.227 | -19.416 | -28.690 | 1.00 | 0.00 |
| ATOM<br>O | 1303 | O    | SER | X | 85 | 10.860 | -18.688 | -29.627 | 1.00 | 0.00 |
| ATOM<br>N | 1304 | N    | LEU | X | 86 | 12.166 | -18.947 | -27.730 | 1.00 | 0.00 |
| ATOM<br>H | 1305 | HN   | LEU | X | 86 | 12.431 | -19.484 | -26.932 | 1.00 | 0.00 |
| ATOM<br>C | 1306 | CA   | LEU | X | 86 | 12.650 | -17.619 | -27.761 | 1.00 | 0.00 |
| ATOM<br>H | 1307 | HA   | LEU | X | 86 | 11.891 | -17.039 | -28.266 | 1.00 | 0.00 |
| ATOM<br>C | 1308 | CB   | LEU | X | 86 | 12.975 | -16.968 | -26.351 | 1.00 | 0.00 |
| ATOM<br>H | 1309 | HB1  | LEU | X | 86 | 13.264 | -15.915 | -26.554 | 1.00 | 0.00 |
| ATOM<br>H | 1310 | HB2  | LEU | X | 86 | 13.898 | -17.372 | -25.884 | 1.00 | 0.00 |
| ATOM<br>C | 1311 | CG   | LEU | X | 86 | 11.827 | -16.858 | -25.430 | 1.00 | 0.00 |
| ATOM<br>H | 1312 | HG   | LEU | X | 86 | 11.301 | -17.830 | -25.316 | 1.00 | 0.00 |
| ATOM<br>C | 1313 | CD1  | LEU | X | 86 | 12.407 | -16.410 | -24.066 | 1.00 | 0.00 |
| ATOM<br>H | 1314 | HD11 | LEU | X | 86 | 11.571 | -16.310 | -23.341 | 1.00 | 0.00 |
| ATOM<br>H | 1315 | HD12 | LEU | X | 86 | 12.830 | -15.384 | -24.025 | 1.00 | 0.00 |
| ATOM<br>H | 1316 | HD13 | LEU | X | 86 | 13.157 | -17.053 | -23.558 | 1.00 | 0.00 |
| ATOM<br>C | 1317 | CD2  | LEU | X | 86 | 10.775 | -15.989 | -25.983 | 1.00 | 0.00 |
| ATOM<br>H | 1318 | HD21 | LEU | X | 86 | 10.269 | -16.408 | -26.879 | 1.00 | 0.00 |
| ATOM<br>H | 1319 | HD22 | LEU | X | 86 | 11.083 | -14.926 | -26.078 | 1.00 | 0.00 |
| ATOM<br>H | 1320 | HD23 | LEU | X | 86 | 9.948  | -15.952 | -25.241 | 1.00 | 0.00 |
| ATOM<br>C | 1321 | C    | LEU | X | 86 | 13.870 | -17.450 | -28.711 | 1.00 | 0.00 |
| ATOM<br>O | 1322 | O    | LEU | X | 86 | 14.726 | -18.313 | -28.907 | 1.00 | 0.00 |
| ATOM<br>N | 1323 | N    | ARG | X | 87 | 13.905 | -16.339 | -29.484 | 1.00 | 0.00 |
| ATOM<br>H | 1324 | HN   | ARG | X | 87 | 13.315 | -15.570 | -29.249 | 1.00 | 0.00 |
| ATOM<br>C | 1325 | CA   | ARG | X | 87 | 14.837 | -16.057 | -30.553 | 1.00 | 0.00 |



|           |      |     |     |   |    |        |         |         |      |      |
|-----------|------|-----|-----|---|----|--------|---------|---------|------|------|
| ATOM<br>C | 1351 | CB  | ALA | X | 88 | 18.449 | -13.021 | -32.051 | 1.00 | 0.00 |
| ATOM<br>H | 1352 | HB1 | ALA | X | 88 | 19.233 | -12.350 | -31.637 | 1.00 | 0.00 |
| ATOM<br>H | 1353 | HB2 | ALA | X | 88 | 18.041 | -12.519 | -32.954 | 1.00 | 0.00 |
| ATOM<br>H | 1354 | HB3 | ALA | X | 88 | 18.870 | -14.027 | -32.260 | 1.00 | 0.00 |
| ATOM<br>C | 1355 | C   | ALA | X | 88 | 16.841 | -11.825 | -30.565 | 1.00 | 0.00 |
| ATOM<br>O | 1356 | O   | ALA | X | 88 | 17.270 | -11.058 | -29.730 | 1.00 | 0.00 |
| ATOM<br>N | 1357 | N   | GLU | X | 89 | 15.667 | -11.487 | -31.226 | 1.00 | 0.00 |
| ATOM<br>H | 1358 | HN  | GLU | X | 89 | 15.251 | -12.167 | -31.825 | 1.00 | 0.00 |
| ATOM<br>C | 1359 | CA  | GLU | X | 89 | 15.049 | -10.142 | -31.090 | 1.00 | 0.00 |
| ATOM<br>H | 1360 | HA  | GLU | X | 89 | 15.762 | -9.444  | -30.678 | 1.00 | 0.00 |
| ATOM<br>C | 1361 | CB  | GLU | X | 89 | 14.502 | -9.714  | -32.477 | 1.00 | 0.00 |
| ATOM<br>H | 1362 | HB1 | GLU | X | 89 | 14.209 | -8.656  | -32.305 | 1.00 | 0.00 |
| ATOM<br>H | 1363 | HB2 | GLU | X | 89 | 13.586 | -10.261 | -32.787 | 1.00 | 0.00 |
| ATOM<br>C | 1364 | CG  | GLU | X | 89 | 15.546 | -9.733  | -33.660 | 1.00 | 0.00 |
| ATOM<br>H | 1365 | HG1 | GLU | X | 89 | 15.921 | -10.776 | -33.739 | 1.00 | 0.00 |
| ATOM<br>H | 1366 | HG2 | GLU | X | 89 | 16.403 | -9.135  | -33.282 | 1.00 | 0.00 |
| ATOM<br>C | 1367 | CD  | GLU | X | 89 | 15.279 | -9.162  | -35.043 | 1.00 | 0.00 |
| ATOM<br>O | 1368 | OE1 | GLU | X | 89 | 16.122 | -9.348  | -35.928 | 1.00 | 0.00 |
| ATOM<br>O | 1369 | OE2 | GLU | X | 89 | 14.265 | -8.459  | -35.121 | 1.00 | 0.00 |
| ATOM<br>C | 1370 | C   | GLU | X | 89 | 13.880 | -10.088 | -30.076 | 1.00 | 0.00 |
| ATOM<br>O | 1371 | O   | GLU | X | 89 | 13.017 | -9.228  | -30.081 | 1.00 | 0.00 |
| ATOM<br>N | 1372 | N   | ASP | X | 90 | 13.772 | -11.209 | -29.277 | 1.00 | 0.00 |
| ATOM<br>H | 1373 | HN  | ASP | X | 90 | 14.395 | -11.981 | -29.372 | 1.00 | 0.00 |
| ATOM<br>C | 1374 | CA  | ASP | X | 90 | 12.795 | -11.327 | -28.082 | 1.00 | 0.00 |
| ATOM<br>H | 1375 | HA  | ASP | X | 90 | 12.021 | -10.598 | -28.270 | 1.00 | 0.00 |







|           |      |     |       |    |        |         |         |      |      |
|-----------|------|-----|-------|----|--------|---------|---------|------|------|
| ATOM<br>C | 1426 | CA  | TYR X | 94 | 9.559  | -6.629  | -18.637 | 1.00 | 0.00 |
| ATOM<br>H | 1427 | HA  | TYR X | 94 | 8.937  | -6.350  | -19.474 | 1.00 | 0.00 |
| ATOM<br>C | 1428 | CB  | TYR X | 94 | 9.135  | -8.078  | -18.534 | 1.00 | 0.00 |
| ATOM<br>H | 1429 | HB1 | TYR X | 94 | 8.159  | -8.169  | -18.010 | 1.00 | 0.00 |
| ATOM<br>H | 1430 | HB2 | TYR X | 94 | 9.872  | -8.601  | -17.888 | 1.00 | 0.00 |
| ATOM<br>C | 1431 | CG  | TYR X | 94 | 9.011  | -8.786  | -19.807 | 1.00 | 0.00 |
| ATOM<br>C | 1432 | CD1 | TYR X | 94 | 10.164 | -9.305  | -20.437 | 1.00 | 0.00 |
| ATOM<br>H | 1433 | HD1 | TYR X | 94 | 11.120 | -9.331  | -19.935 | 1.00 | 0.00 |
| ATOM<br>C | 1434 | CE1 | TYR X | 94 | 10.138 | -10.122 | -21.505 | 1.00 | 0.00 |
| ATOM<br>H | 1435 | HE1 | TYR X | 94 | 11.029 | -10.468 | -22.006 | 1.00 | 0.00 |
| ATOM<br>C | 1436 | CZ  | TYR X | 94 | 8.920  | -10.326 | -22.177 | 1.00 | 0.00 |
| ATOM<br>O | 1437 | OH  | TYR X | 94 | 8.700  | -11.047 | -23.378 | 1.00 | 0.00 |
| ATOM<br>H | 1438 | HH  | TYR X | 94 | 9.550  | -11.451 | -23.567 | 1.00 | 0.00 |
| ATOM<br>C | 1439 | CD2 | TYR X | 94 | 7.779  | -9.051  | -20.416 | 1.00 | 0.00 |
| ATOM<br>H | 1440 | HD2 | TYR X | 94 | 6.907  | -8.675  | -19.901 | 1.00 | 0.00 |
| ATOM<br>C | 1441 | CE2 | TYR X | 94 | 7.717  | -9.835  | -21.587 | 1.00 | 0.00 |
| ATOM<br>H | 1442 | HE2 | TYR X | 94 | 6.806  | -9.960  | -22.153 | 1.00 | 0.00 |
| ATOM<br>C | 1443 | C   | TYR X | 94 | 9.201  | -5.884  | -17.358 | 1.00 | 0.00 |
| ATOM<br>O | 1444 | O   | TYR X | 94 | 9.945  | -5.799  | -16.412 | 1.00 | 0.00 |
| ATOM<br>N | 1445 | N   | TYR X | 95 | 7.936  | -5.389  | -17.326 | 1.00 | 0.00 |
| ATOM<br>H | 1446 | HN  | TYR X | 95 | 7.335  | -5.463  | -18.118 | 1.00 | 0.00 |
| ATOM<br>C | 1447 | CA  | TYR X | 95 | 7.352  | -4.722  | -16.149 | 1.00 | 0.00 |
| ATOM<br>H | 1448 | HA  | TYR X | 95 | 7.954  | -4.832  | -15.259 | 1.00 | 0.00 |
| ATOM<br>C | 1449 | CB  | TYR X | 95 | 7.170  | -3.163  | -16.407 | 1.00 | 0.00 |
| ATOM<br>H | 1450 | HB1 | TYR X | 95 | 6.373  | -2.644  | -15.832 | 1.00 | 0.00 |



|           |      |     |     |   |    |        |        |         |      |      |
|-----------|------|-----|-----|---|----|--------|--------|---------|------|------|
| ATOM<br>N | 1476 | N   | ALA | X | 97 | 2.214  | -5.508 | -14.127 | 1.00 | 0.00 |
| ATOM<br>H | 1477 | HN  | ALA | X | 97 | 1.913  | -6.373 | -14.521 | 1.00 | 0.00 |
| ATOM<br>C | 1478 | CA  | ALA | X | 97 | 1.215  | -4.514 | -14.002 | 1.00 | 0.00 |
| ATOM<br>H | 1479 | HA  | ALA | X | 97 | 1.530  | -3.757 | -13.300 | 1.00 | 0.00 |
| ATOM<br>C | 1480 | CB  | ALA | X | 97 | 1.067  | -3.747 | -15.334 | 1.00 | 0.00 |
| ATOM<br>H | 1481 | HB1 | ALA | X | 97 | 2.011  | -3.224 | -15.600 | 1.00 | 0.00 |
| ATOM<br>H | 1482 | HB2 | ALA | X | 97 | 0.369  | -2.906 | -15.133 | 1.00 | 0.00 |
| ATOM<br>H | 1483 | HB3 | ALA | X | 97 | 0.911  | -4.343 | -16.259 | 1.00 | 0.00 |
| ATOM<br>C | 1484 | C   | ALA | X | 97 | -0.033 | -5.000 | -13.358 | 1.00 | 0.00 |
| ATOM<br>O | 1485 | O   | ALA | X | 97 | -0.399 | -6.131 | -13.458 | 1.00 | 0.00 |
| ATOM<br>N | 1486 | N   | SER | X | 98 | -0.683 | -4.073 | -12.637 | 1.00 | 0.00 |
| ATOM<br>H | 1487 | HN  | SER | X | 98 | -0.352 | -3.141 | -12.505 | 1.00 | 0.00 |
| ATOM<br>C | 1488 | CA  | SER | X | 98 | -1.845 | -4.355 | -11.875 | 1.00 | 0.00 |
| ATOM<br>H | 1489 | HA  | SER | X | 98 | -2.322 | -5.284 | -12.149 | 1.00 | 0.00 |
| ATOM<br>C | 1490 | CB  | SER | X | 98 | -1.638 | -4.389 | -10.305 | 1.00 | 0.00 |
| ATOM<br>H | 1491 | HB1 | SER | X | 98 | -1.257 | -5.417 | -10.121 | 1.00 | 0.00 |
| ATOM<br>H | 1492 | HB2 | SER | X | 98 | -2.615 | -4.200 | -9.810  | 1.00 | 0.00 |
| ATOM<br>O | 1493 | OG  | SER | X | 98 | -0.727 | -3.387 | -9.832  | 1.00 | 0.00 |
| ATOM<br>H | 1494 | HG1 | SER | X | 98 | 0.129  | -3.557 | -10.233 | 1.00 | 0.00 |
| ATOM<br>C | 1495 | C   | SER | X | 98 | -2.971 | -3.314 | -12.086 | 1.00 | 0.00 |
| ATOM<br>O | 1496 | O   | SER | X | 98 | -2.821 | -2.166 | -12.517 | 1.00 | 0.00 |
| ATOM<br>N | 1497 | N   | SER | X | 99 | -4.198 | -3.780 | -11.893 | 1.00 | 0.00 |
| ATOM<br>H | 1498 | HN  | SER | X | 99 | -4.444 | -4.745 | -11.929 | 1.00 | 0.00 |
| ATOM<br>C | 1499 | CA  | SER | X | 99 | -5.344 | -2.743 | -12.104 | 1.00 | 0.00 |
| ATOM<br>H | 1500 | HA  | SER | X | 99 | -4.962 | -1.818 | -11.697 | 1.00 | 0.00 |

|           |      |     |     |   |     |         |        |         |      |      |
|-----------|------|-----|-----|---|-----|---------|--------|---------|------|------|
| ATOM<br>C | 1501 | CB  | SER | X | 99  | -5.841  | -2.367 | -13.498 | 1.00 | 0.00 |
| ATOM<br>H | 1502 | HB1 | SER | X | 99  | -5.031  | -1.995 | -14.161 | 1.00 | 0.00 |
| ATOM<br>H | 1503 | HB2 | SER | X | 99  | -6.630  | -1.608 | -13.314 | 1.00 | 0.00 |
| ATOM<br>O | 1504 | OG  | SER | X | 99  | -6.461  | -3.448 | -14.253 | 1.00 | 0.00 |
| ATOM<br>H | 1505 | HG1 | SER | X | 99  | -5.716  | -3.930 | -14.620 | 1.00 | 0.00 |
| ATOM<br>C | 1506 | C   | SER | X | 99  | -6.526  | -3.055 | -11.182 | 1.00 | 0.00 |
| ATOM<br>O | 1507 | O   | SER | X | 99  | -6.820  | -4.224 | -11.049 | 1.00 | 0.00 |
| ATOM<br>N | 1508 | N   | SER | X | 100 | -7.304  | -2.039 | -10.685 | 1.00 | 0.00 |
| ATOM<br>H | 1509 | HN  | SER | X | 100 | -7.070  | -1.084 | -10.854 | 1.00 | 0.00 |
| ATOM<br>C | 1510 | CA  | SER | X | 100 | -8.544  | -2.355 | -9.936  | 1.00 | 0.00 |
| ATOM<br>H | 1511 | HA  | SER | X | 100 | -8.563  | -3.378 | -9.593  | 1.00 | 0.00 |
| ATOM<br>C | 1512 | CB  | SER | X | 100 | -8.619  | -1.318 | -8.849  | 1.00 | 0.00 |
| ATOM<br>H | 1513 | HB1 | SER | X | 100 | -8.824  | -0.285 | -9.202  | 1.00 | 0.00 |
| ATOM<br>H | 1514 | HB2 | SER | X | 100 | -7.615  | -1.415 | -8.384  | 1.00 | 0.00 |
| ATOM<br>O | 1515 | OG  | SER | X | 100 | -9.718  | -1.596 | -7.959  | 1.00 | 0.00 |
| ATOM<br>H | 1516 | HG1 | SER | X | 100 | -9.407  | -2.160 | -7.247  | 1.00 | 0.00 |
| ATOM<br>C | 1517 | C   | SER | X | 100 | -9.807  | -2.154 | -10.850 | 1.00 | 0.00 |
| ATOM<br>O | 1518 | O   | SER | X | 100 | -9.927  | -1.174 | -11.603 | 1.00 | 0.00 |
| ATOM<br>N | 1519 | N   | GLY | X | 101 | -10.710 | -3.097 | -10.927 | 1.00 | 0.00 |
| ATOM<br>H | 1520 | HN  | GLY | X | 101 | -10.714 | -3.851 | -10.275 | 1.00 | 0.00 |
| ATOM<br>C | 1521 | CA  | GLY | X | 101 | -11.838 | -3.087 | -11.945 | 1.00 | 0.00 |
| ATOM<br>H | 1522 | HA1 | GLY | X | 101 | -12.447 | -2.213 | -11.766 | 1.00 | 0.00 |
| ATOM<br>H | 1523 | HA2 | GLY | X | 101 | -12.392 | -4.014 | -11.929 | 1.00 | 0.00 |
| ATOM<br>C | 1524 | C   | GLY | X | 101 | -11.527 | -2.911 | -13.303 | 1.00 | 0.00 |
| ATOM<br>O | 1525 | O   | GLY | X | 101 | -12.208 | -2.248 | -14.094 | 1.00 | 0.00 |

|           |      |     |           |         |        |         |      |      |
|-----------|------|-----|-----------|---------|--------|---------|------|------|
| ATOM<br>N | 1526 | N   | TYR X 102 | -10.425 | -3.509 | -13.707 | 1.00 | 0.00 |
| ATOM<br>H | 1527 | HN  | TYR X 102 | -9.824  | -3.910 | -13.021 | 1.00 | 0.00 |
| ATOM<br>C | 1528 | CA  | TYR X 102 | -9.882  | -3.413 | -15.086 | 1.00 | 0.00 |
| ATOM<br>H | 1529 | HA  | TYR X 102 | -8.975  | -3.997 | -15.032 | 1.00 | 0.00 |
| ATOM<br>C | 1530 | CB  | TYR X 102 | -10.996 | -3.835 | -16.109 | 1.00 | 0.00 |
| ATOM<br>H | 1531 | HB1 | TYR X 102 | -10.529 | -3.867 | -17.117 | 1.00 | 0.00 |
| ATOM<br>H | 1532 | HB2 | TYR X 102 | -11.924 | -3.260 | -16.317 | 1.00 | 0.00 |
| ATOM<br>C | 1533 | CG  | TYR X 102 | -11.324 | -5.430 | -15.886 | 1.00 | 0.00 |
| ATOM<br>C | 1534 | CD1 | TYR X 102 | -12.676 | -5.768 | -15.932 | 1.00 | 0.00 |
| ATOM<br>H | 1535 | HD1 | TYR X 102 | -13.454 | -5.022 | -16.001 | 1.00 | 0.00 |
| ATOM<br>C | 1536 | CE1 | TYR X 102 | -13.113 | -7.134 | -15.905 | 1.00 | 0.00 |
| ATOM<br>H | 1537 | HE1 | TYR X 102 | -14.162 | -7.368 | -16.012 | 1.00 | 0.00 |
| ATOM<br>C | 1538 | CZ  | TYR X 102 | -12.070 | -8.124 | -15.988 | 1.00 | 0.00 |
| ATOM<br>O | 1539 | OH  | TYR X 102 | -12.244 | -9.519 | -16.085 | 1.00 | 0.00 |
| ATOM<br>H | 1540 | HH  | TYR X 102 | -13.182 | -9.722 | -16.124 | 1.00 | 0.00 |
| ATOM<br>C | 1541 | CD2 | TYR X 102 | -10.329 | -6.389 | -15.846 | 1.00 | 0.00 |
| ATOM<br>H | 1542 | HD2 | TYR X 102 | -9.295  | -6.095 | -15.738 | 1.00 | 0.00 |
| ATOM<br>C | 1543 | CE2 | TYR X 102 | -10.730 | -7.714 | -15.968 | 1.00 | 0.00 |
| ATOM<br>H | 1544 | HE2 | TYR X 102 | -9.954  | -8.462 | -16.037 | 1.00 | 0.00 |
| ATOM<br>C | 1545 | C   | TYR X 102 | -9.319  | -2.077 | -15.611 | 1.00 | 0.00 |
| ATOM<br>O | 1546 | O   | TYR X 102 | -9.019  | -1.898 | -16.767 | 1.00 | 0.00 |
| ATOM<br>N | 1547 | N   | LEU X 103 | -9.132  | -1.089 | -14.744 | 1.00 | 0.00 |
| ATOM<br>H | 1548 | HN  | LEU X 103 | -9.233  | -1.208 | -13.760 | 1.00 | 0.00 |
| ATOM<br>C | 1549 | CA  | LEU X 103 | -8.956  | 0.323  | -15.125 | 1.00 | 0.00 |
| ATOM<br>H | 1550 | HA  | LEU X 103 | -9.095  | 0.452  | -16.189 | 1.00 | 0.00 |

|           |      |      |           |         |       |         |      |      |
|-----------|------|------|-----------|---------|-------|---------|------|------|
| ATOM<br>C | 1551 | CB   | LEU X 103 | -10.011 | 1.128 | -14.343 | 1.00 | 0.00 |
| ATOM<br>H | 1552 | HB1  | LEU X 103 | -9.775  | 0.981 | -13.267 | 1.00 | 0.00 |
| ATOM<br>H | 1553 | HB2  | LEU X 103 | -11.039 | 0.766 | -14.558 | 1.00 | 0.00 |
| ATOM<br>C | 1554 | CG   | LEU X 103 | -9.960  | 2.664 | -14.503 | 1.00 | 0.00 |
| ATOM<br>H | 1555 | HG   | LEU X 103 | -8.918  | 3.013 | -14.335 | 1.00 | 0.00 |
| ATOM<br>C | 1556 | CD1  | LEU X 103 | -10.642 | 3.179 | -15.843 | 1.00 | 0.00 |
| ATOM<br>H | 1557 | HD11 | LEU X 103 | -11.689 | 2.809 | -15.872 | 1.00 | 0.00 |
| ATOM<br>H | 1558 | HD12 | LEU X 103 | -10.083 | 2.655 | -16.648 | 1.00 | 0.00 |
| ATOM<br>H | 1559 | HD13 | LEU X 103 | -10.537 | 4.254 | -16.102 | 1.00 | 0.00 |
| ATOM<br>C | 1560 | CD2  | LEU X 103 | -10.796 | 3.321 | -13.386 | 1.00 | 0.00 |
| ATOM<br>H | 1561 | HD21 | LEU X 103 | -11.077 | 4.339 | -13.732 | 1.00 | 0.00 |
| ATOM<br>H | 1562 | HD22 | LEU X 103 | -10.249 | 3.379 | -12.421 | 1.00 | 0.00 |
| ATOM<br>H | 1563 | HD23 | LEU X 103 | -11.783 | 2.843 | -13.210 | 1.00 | 0.00 |
| ATOM<br>C | 1564 | C    | LEU X 103 | -7.662  | 0.866 | -14.773 | 1.00 | 0.00 |
| ATOM<br>O | 1565 | O    | LEU X 103 | -7.262  | 0.893 | -13.614 | 1.00 | 0.00 |
| ATOM<br>N | 1566 | N    | PHE X 104 | -6.932  | 1.319 | -15.788 | 1.00 | 0.00 |
| ATOM<br>H | 1567 | HN   | PHE X 104 | -7.180  | 1.260 | -16.752 | 1.00 | 0.00 |
| ATOM<br>C | 1568 | CA   | PHE X 104 | -5.671  | 2.052 | -15.655 | 1.00 | 0.00 |
| ATOM<br>H | 1569 | HA   | PHE X 104 | -4.849  | 1.510 | -15.211 | 1.00 | 0.00 |
| ATOM<br>C | 1570 | CB   | PHE X 104 | -5.318  | 2.346 | -17.174 | 1.00 | 0.00 |
| ATOM<br>H | 1571 | HB1  | PHE X 104 | -6.134  | 3.059 | -17.421 | 1.00 | 0.00 |
| ATOM<br>H | 1572 | HB2  | PHE X 104 | -5.401  | 1.491 | -17.879 | 1.00 | 0.00 |
| ATOM<br>C | 1573 | CG   | PHE X 104 | -4.005  | 3.129 | -17.293 | 1.00 | 0.00 |
| ATOM<br>C | 1574 | CD1  | PHE X 104 | -3.898  | 4.551 | -17.248 | 1.00 | 0.00 |
| ATOM<br>H | 1575 | HD1  | PHE X 104 | -4.833  | 5.089 | -17.295 | 1.00 | 0.00 |







|           |      |     |           |       |        |         |      |      |
|-----------|------|-----|-----------|-------|--------|---------|------|------|
| ATOM<br>N | 1626 | N   | TYR X 108 | 3.275 | 3.108  | -9.842  | 1.00 | 0.00 |
| ATOM<br>H | 1627 | HN  | TYR X 108 | 2.414 | 2.650  | -9.634  | 1.00 | 0.00 |
| ATOM<br>C | 1628 | CA  | TYR X 108 | 4.392 | 2.640  | -8.944  | 1.00 | 0.00 |
| ATOM<br>H | 1629 | HA  | TYR X 108 | 5.135 | 3.423  | -8.997  | 1.00 | 0.00 |
| ATOM<br>C | 1630 | CB  | TYR X 108 | 4.012 | 2.487  | -7.461  | 1.00 | 0.00 |
| ATOM<br>H | 1631 | HB1 | TYR X 108 | 3.283 | 1.650  | -7.412  | 1.00 | 0.00 |
| ATOM<br>H | 1632 | HB2 | TYR X 108 | 3.546 | 3.375  | -6.982  | 1.00 | 0.00 |
| ATOM<br>C | 1633 | CG  | TYR X 108 | 5.072 | 2.099  | -6.469  | 1.00 | 0.00 |
| ATOM<br>C | 1634 | CD1 | TYR X 108 | 4.634 | 1.334  | -5.286  | 1.00 | 0.00 |
| ATOM<br>H | 1635 | HD1 | TYR X 108 | 3.572 | 1.192  | -5.146  | 1.00 | 0.00 |
| ATOM<br>C | 1636 | CE1 | TYR X 108 | 5.518 | 1.053  | -4.240  | 1.00 | 0.00 |
| ATOM<br>H | 1637 | HE1 | TYR X 108 | 5.185 | 0.480  | -3.388  | 1.00 | 0.00 |
| ATOM<br>C | 1638 | CZ  | TYR X 108 | 6.868 | 1.306  | -4.442  | 1.00 | 0.00 |
| ATOM<br>O | 1639 | OH  | TYR X 108 | 7.800 | 0.812  | -3.464  | 1.00 | 0.00 |
| ATOM<br>H | 1640 | HH  | TYR X 108 | 7.351 | 0.323  | -2.770  | 1.00 | 0.00 |
| ATOM<br>C | 1641 | CD2 | TYR X 108 | 6.442 | 2.458  | -6.544  | 1.00 | 0.00 |
| ATOM<br>H | 1642 | HD2 | TYR X 108 | 6.850 | 2.983  | -7.395  | 1.00 | 0.00 |
| ATOM<br>C | 1643 | CE2 | TYR X 108 | 7.299 | 2.076  | -5.521  | 1.00 | 0.00 |
| ATOM<br>H | 1644 | HE2 | TYR X 108 | 8.368 | 2.218  | -5.593  | 1.00 | 0.00 |
| ATOM<br>C | 1645 | C   | TYR X 108 | 5.076 | 1.413  | -9.540  | 1.00 | 0.00 |
| ATOM<br>O | 1646 | O   | TYR X 108 | 4.778 | 0.299  | -9.062  | 1.00 | 0.00 |
| ATOM<br>N | 1647 | N   | TRP X 109 | 5.899 | 1.629  | -10.541 | 1.00 | 0.00 |
| ATOM<br>H | 1648 | HN  | TRP X 109 | 5.955 | 2.546  | -10.929 | 1.00 | 0.00 |
| ATOM<br>C | 1649 | CA  | TRP X 109 | 6.558 | 0.584  | -11.278 | 1.00 | 0.00 |
| ATOM<br>H | 1650 | HA  | TRP X 109 | 5.776 | -0.135 | -11.475 | 1.00 | 0.00 |



|           |      |      |           |        |        |         |      |      |
|-----------|------|------|-----------|--------|--------|---------|------|------|
| ATOM<br>C | 1676 | C    | GLY X 110 | 9.998  | -2.039 | -10.493 | 1.00 | 0.00 |
| ATOM<br>O | 1677 | O    | GLY X 110 | 10.242 | -1.243 | -11.349 | 1.00 | 0.00 |
| ATOM<br>N | 1678 | N    | GLN X 111 | 10.956 | -2.850 | -9.942  | 1.00 | 0.00 |
| ATOM<br>H | 1679 | HN   | GLN X 111 | 10.784 | -3.606 | -9.316  | 1.00 | 0.00 |
| ATOM<br>C | 1680 | CA   | GLN X 111 | 12.337 | -2.787 | -10.350 | 1.00 | 0.00 |
| ATOM<br>H | 1681 | HA   | GLN X 111 | 12.669 | -1.772 | -10.189 | 1.00 | 0.00 |
| ATOM<br>C | 1682 | CB   | GLN X 111 | 13.340 | -3.607 | -9.457  | 1.00 | 0.00 |
| ATOM<br>H | 1683 | HB1  | GLN X 111 | 14.353 | -3.588 | -9.914  | 1.00 | 0.00 |
| ATOM<br>H | 1684 | HB2  | GLN X 111 | 13.002 | -4.665 | -9.484  | 1.00 | 0.00 |
| ATOM<br>C | 1685 | CG   | GLN X 111 | 13.436 | -3.216 | -7.961  | 1.00 | 0.00 |
| ATOM<br>H | 1686 | HG1  | GLN X 111 | 14.310 | -3.754 | -7.534  | 1.00 | 0.00 |
| ATOM<br>H | 1687 | HG2  | GLN X 111 | 12.519 | -3.644 | -7.503  | 1.00 | 0.00 |
| ATOM<br>C | 1688 | CD   | GLN X 111 | 13.629 | -1.697 | -7.784  | 1.00 | 0.00 |
| ATOM<br>O | 1689 | OE1  | GLN X 111 | 14.773 | -1.221 | -7.874  | 1.00 | 0.00 |
| ATOM<br>N | 1690 | NE2  | GLN X 111 | 12.565 | -0.964 | -7.470  | 1.00 | 0.00 |
| ATOM<br>H | 1691 | HE21 | GLN X 111 | 12.530 | 0.002  | -7.725  | 1.00 | 0.00 |
| ATOM<br>H | 1692 | HE22 | GLN X 111 | 11.731 | -1.488 | -7.296  | 1.00 | 0.00 |
| ATOM<br>C | 1693 | C    | GLN X 111 | 12.588 | -3.092 | -11.846 | 1.00 | 0.00 |
| ATOM<br>O | 1694 | O    | GLN X 111 | 13.344 | -2.373 | -12.553 | 1.00 | 0.00 |
| ATOM<br>N | 1695 | N    | GLY X 112 | 11.930 | -4.102 | -12.349 | 1.00 | 0.00 |
| ATOM<br>H | 1696 | HN   | GLY X 112 | 11.257 | -4.525 | -11.746 | 1.00 | 0.00 |
| ATOM<br>C | 1697 | CA   | GLY X 112 | 12.082 | -4.505 | -13.820 | 1.00 | 0.00 |
| ATOM<br>H | 1698 | HA1  | GLY X 112 | 12.374 | -3.665 | -14.433 | 1.00 | 0.00 |
| ATOM<br>H | 1699 | HA2  | GLY X 112 | 11.087 | -4.870 | -14.029 | 1.00 | 0.00 |
| ATOM<br>C | 1700 | C    | GLY X 112 | 13.069 | -5.593 | -14.092 | 1.00 | 0.00 |

|           |      |      |           |        |         |         |      |      |
|-----------|------|------|-----------|--------|---------|---------|------|------|
| ATOM<br>O | 1701 | O    | GLY X 112 | 14.182 | -5.688  | -13.534 | 1.00 | 0.00 |
| ATOM<br>N | 1702 | N    | THR X 113 | 12.733 | -6.478  | -15.017 | 1.00 | 0.00 |
| ATOM<br>H | 1703 | HN   | THR X 113 | 11.862 | -6.481  | -15.502 | 1.00 | 0.00 |
| ATOM<br>C | 1704 | CA   | THR X 113 | 13.655 | -7.610  | -15.133 | 1.00 | 0.00 |
| ATOM<br>H | 1705 | HA   | THR X 113 | 14.660 | -7.425  | -14.784 | 1.00 | 0.00 |
| ATOM<br>C | 1706 | CB   | THR X 113 | 13.008 | -8.892  | -14.670 | 1.00 | 0.00 |
| ATOM<br>H | 1707 | HB   | THR X 113 | 12.031 | -9.035  | -15.179 | 1.00 | 0.00 |
| ATOM<br>O | 1708 | OG1  | THR X 113 | 12.931 | -9.027  | -13.295 | 1.00 | 0.00 |
| ATOM<br>H | 1709 | HG1  | THR X 113 | 12.157 | -8.568  | -12.962 | 1.00 | 0.00 |
| ATOM<br>C | 1710 | CG2  | THR X 113 | 13.815 | -10.106 | -15.098 | 1.00 | 0.00 |
| ATOM<br>H | 1711 | HG21 | THR X 113 | 13.267 | -11.007 | -14.749 | 1.00 | 0.00 |
| ATOM<br>H | 1712 | HG22 | THR X 113 | 14.836 | -10.190 | -14.669 | 1.00 | 0.00 |
| ATOM<br>H | 1713 | HG23 | THR X 113 | 14.031 | -10.265 | -16.176 | 1.00 | 0.00 |
| ATOM<br>C | 1714 | C    | THR X 113 | 13.866 | -7.781  | -16.626 | 1.00 | 0.00 |
| ATOM<br>O | 1715 | O    | THR X 113 | 12.918 | -7.748  | -17.427 | 1.00 | 0.00 |
| ATOM<br>N | 1716 | N    | LEU X 114 | 15.163 | -7.813  | -17.061 | 1.00 | 0.00 |
| ATOM<br>H | 1717 | HN   | LEU X 114 | 15.926 | -7.805  | -16.419 | 1.00 | 0.00 |
| ATOM<br>C | 1718 | CA   | LEU X 114 | 15.617 | -8.025  | -18.436 | 1.00 | 0.00 |
| ATOM<br>H | 1719 | HA   | LEU X 114 | 14.809 | -7.635  | -19.038 | 1.00 | 0.00 |
| ATOM<br>C | 1720 | CB   | LEU X 114 | 17.028 | -7.424  | -18.605 | 1.00 | 0.00 |
| ATOM<br>H | 1721 | HB1  | LEU X 114 | 17.729 | -7.914  | -17.897 | 1.00 | 0.00 |
| ATOM<br>H | 1722 | HB2  | LEU X 114 | 17.042 | -6.345  | -18.341 | 1.00 | 0.00 |
| ATOM<br>C | 1723 | CG   | LEU X 114 | 17.748 | -7.509  | -19.931 | 1.00 | 0.00 |
| ATOM<br>H | 1724 | HG   | LEU X 114 | 17.932 | -8.541  | -20.298 | 1.00 | 0.00 |
| ATOM<br>C | 1725 | CD1  | LEU X 114 | 17.189 | -6.657  | -21.075 | 1.00 | 0.00 |



|           |      |      |           |        |         |         |      |      |
|-----------|------|------|-----------|--------|---------|---------|------|------|
| ATOM<br>N | 1751 | N    | THR X 116 | 16.997 | -11.915 | -21.816 | 1.00 | 0.00 |
| ATOM<br>H | 1752 | HN   | THR X 116 | 17.218 | -12.696 | -21.237 | 1.00 | 0.00 |
| ATOM<br>C | 1753 | CA   | THR X 116 | 17.876 | -11.628 | -22.891 | 1.00 | 0.00 |
| ATOM<br>H | 1754 | HA   | THR X 116 | 17.348 | -11.055 | -23.639 | 1.00 | 0.00 |
| ATOM<br>C | 1755 | CB   | THR X 116 | 19.052 | -10.808 | -22.464 | 1.00 | 0.00 |
| ATOM<br>H | 1756 | HB   | THR X 116 | 18.678 | -9.816  | -22.133 | 1.00 | 0.00 |
| ATOM<br>O | 1757 | OG1  | THR X 116 | 19.946 | -10.468 | -23.499 | 1.00 | 0.00 |
| ATOM<br>H | 1758 | HG1  | THR X 116 | 19.421 | -9.916  | -24.083 | 1.00 | 0.00 |
| ATOM<br>C | 1759 | CG2  | THR X 116 | 19.921 | -11.505 | -21.375 | 1.00 | 0.00 |
| ATOM<br>H | 1760 | HG21 | THR X 116 | 20.675 | -10.848 | -20.891 | 1.00 | 0.00 |
| ATOM<br>H | 1761 | HG22 | THR X 116 | 20.461 | -12.423 | -21.691 | 1.00 | 0.00 |
| ATOM<br>H | 1762 | HG23 | THR X 116 | 19.343 | -11.824 | -20.482 | 1.00 | 0.00 |
| ATOM<br>C | 1763 | C    | THR X 116 | 18.140 | -12.895 | -23.666 | 1.00 | 0.00 |
| ATOM<br>O | 1764 | O    | THR X 116 | 18.379 | -13.988 | -23.151 | 1.00 | 0.00 |
| ATOM<br>N | 1765 | N    | VAL X 117 | 17.933 | -12.891 | -25.038 | 1.00 | 0.00 |
| ATOM<br>H | 1766 | HN   | VAL X 117 | 17.777 | -12.061 | -25.568 | 1.00 | 0.00 |
| ATOM<br>C | 1767 | CA   | VAL X 117 | 18.049 | -14.126 | -25.821 | 1.00 | 0.00 |
| ATOM<br>H | 1768 | HA   | VAL X 117 | 18.031 | -14.990 | -25.174 | 1.00 | 0.00 |
| ATOM<br>C | 1769 | CB   | VAL X 117 | 16.958 | -14.279 | -26.845 | 1.00 | 0.00 |
| ATOM<br>H | 1770 | HB   | VAL X 117 | 16.944 | -13.476 | -27.613 | 1.00 | 0.00 |
| ATOM<br>C | 1771 | CG1  | VAL X 117 | 17.346 | -15.611 | -27.586 | 1.00 | 0.00 |
| ATOM<br>H | 1772 | HG11 | VAL X 117 | 16.615 | -15.925 | -28.361 | 1.00 | 0.00 |
| ATOM<br>H | 1773 | HG12 | VAL X 117 | 17.419 | -16.520 | -26.951 | 1.00 | 0.00 |
| ATOM<br>H | 1774 | HG13 | VAL X 117 | 18.214 | -15.456 | -28.261 | 1.00 | 0.00 |
| ATOM<br>C | 1775 | CG2  | VAL X 117 | 15.566 | -14.390 | -26.116 | 1.00 | 0.00 |

|           |      |      |           |        |         |         |      |      |
|-----------|------|------|-----------|--------|---------|---------|------|------|
| ATOM<br>H | 1776 | HG21 | VAL X 117 | 15.607 | -15.342 | -25.545 | 1.00 | 0.00 |
| ATOM<br>H | 1777 | HG22 | VAL X 117 | 14.763 | -14.394 | -26.884 | 1.00 | 0.00 |
| ATOM<br>H | 1778 | HG23 | VAL X 117 | 15.357 | -13.482 | -25.511 | 1.00 | 0.00 |
| ATOM<br>C | 1779 | C    | VAL X 117 | 19.464 | -14.184 | -26.502 | 1.00 | 0.00 |
| ATOM<br>O | 1780 | O    | VAL X 117 | 19.714 | -13.306 | -27.297 | 1.00 | 0.00 |
| ATOM<br>N | 1781 | N    | SER X 118 | 20.240 | -15.213 | -26.152 | 1.00 | 0.00 |
| ATOM<br>H | 1782 | HN   | SER X 118 | 20.037 | -15.799 | -25.372 | 1.00 | 0.00 |
| ATOM<br>C | 1783 | CA   | SER X 118 | 21.613 | -15.291 | -26.673 | 1.00 | 0.00 |
| ATOM<br>H | 1784 | HA   | SER X 118 | 21.696 | -16.368 | -26.662 | 1.00 | 0.00 |
| ATOM<br>C | 1785 | CB   | SER X 118 | 22.011 | -14.750 | -28.112 | 1.00 | 0.00 |
| ATOM<br>H | 1786 | HB1  | SER X 118 | 21.924 | -13.642 | -28.129 | 1.00 | 0.00 |
| ATOM<br>H | 1787 | HB2  | SER X 118 | 21.220 | -15.104 | -28.807 | 1.00 | 0.00 |
| ATOM<br>O | 1788 | OG   | SER X 118 | 23.229 | -15.342 | -28.624 | 1.00 | 0.00 |
| ATOM<br>H | 1789 | HG1  | SER X 118 | 23.431 | -14.793 | -29.385 | 1.00 | 0.00 |
| ATOM<br>C | 1790 | C    | SER X 118 | 22.644 | -14.870 | -25.590 | 1.00 | 0.00 |
| ATOM<br>O | 1791 | O    | SER X 118 | 22.323 | -14.064 | -24.698 | 1.00 | 0.00 |
| ATOM<br>N | 1792 | N    | SER X 119 | 23.857 | -15.433 | -25.674 | 1.00 | 0.00 |
| ATOM<br>H | 1793 | HN   | SER X 119 | 23.956 | -16.086 | -26.421 | 1.00 | 0.00 |
| ATOM<br>C | 1794 | CA   | SER X 119 | 24.995 | -15.003 | -24.836 | 1.00 | 0.00 |
| ATOM<br>H | 1795 | HA   | SER X 119 | 24.702 | -14.996 | -23.796 | 1.00 | 0.00 |
| ATOM<br>C | 1796 | CB   | SER X 119 | 26.247 | -15.950 | -25.126 | 1.00 | 0.00 |
| ATOM<br>H | 1797 | HB1  | SER X 119 | 26.105 | -17.052 | -25.166 | 1.00 | 0.00 |
| ATOM<br>H | 1798 | HB2  | SER X 119 | 26.995 | -15.627 | -24.371 | 1.00 | 0.00 |
| ATOM<br>O | 1799 | OG   | SER X 119 | 26.889 | -15.734 | -26.364 | 1.00 | 0.00 |
| ATOM<br>H | 1800 | HG1  | SER X 119 | 27.532 | -16.443 | -26.447 | 1.00 | 0.00 |







|           |      |      |     |   |     |        |        |         |      |      |
|-----------|------|------|-----|---|-----|--------|--------|---------|------|------|
| ATOM<br>H | 1851 | HG2  | GLN | X | 122 | -3.725 | 1.365  | -36.566 | 1.00 | 0.00 |
| ATOM<br>C | 1852 | CD   | GLN | X | 122 | -2.214 | 0.697  | -37.857 | 1.00 | 0.00 |
| ATOM<br>O | 1853 | OE1  | GLN | X | 122 | -1.379 | 0.993  | -38.727 | 1.00 | 0.00 |
| ATOM<br>N | 1854 | NE2  | GLN | X | 122 | -2.744 | -0.534 | -37.766 | 1.00 | 0.00 |
| ATOM<br>H | 1855 | HE21 | GLN | X | 122 | -3.189 | -0.703 | -36.887 | 1.00 | 0.00 |
| ATOM<br>H | 1856 | HE22 | GLN | X | 122 | -2.343 | -1.236 | -38.355 | 1.00 | 0.00 |
| ATOM<br>C | 1857 | C    | GLN | X | 122 | -2.490 | 3.505  | -34.058 | 1.00 | 0.00 |
| ATOM<br>O | 1858 | O    | GLN | X | 122 | -3.214 | 4.228  | -34.708 | 1.00 | 0.00 |
| ATOM<br>N | 1859 | N    | MET | X | 123 | -1.555 | 4.050  | -33.310 | 1.00 | 0.00 |
| ATOM<br>H | 1860 | HN   | MET | X | 123 | -0.861 | 3.505  | -32.847 | 1.00 | 0.00 |
| ATOM<br>C | 1861 | CA   | MET | X | 123 | -1.427 | 5.411  | -32.849 | 1.00 | 0.00 |
| ATOM<br>H | 1862 | HA   | MET | X | 123 | -2.188 | 5.983  | -33.358 | 1.00 | 0.00 |
| ATOM<br>C | 1863 | CB   | MET | X | 123 | -1.715 | 5.645  | -31.375 | 1.00 | 0.00 |
| ATOM<br>H | 1864 | HB1  | MET | X | 123 | -1.564 | 6.740  | -31.265 | 1.00 | 0.00 |
| ATOM<br>H | 1865 | HB2  | MET | X | 123 | -1.005 | 5.061  | -30.751 | 1.00 | 0.00 |
| ATOM<br>C | 1866 | CG   | MET | X | 123 | -3.012 | 5.154  | -31.036 | 1.00 | 0.00 |
| ATOM<br>H | 1867 | HG1  | MET | X | 123 | -2.896 | 4.066  | -30.843 | 1.00 | 0.00 |
| ATOM<br>H | 1868 | HG2  | MET | X | 123 | -3.802 | 5.175  | -31.817 | 1.00 | 0.00 |
| ATOM<br>S | 1869 | SD   | MET | X | 123 | -3.737 | 6.167  | -29.738 | 1.00 | 0.00 |
| ATOM<br>C | 1870 | CE   | MET | X | 123 | -2.643 | 5.870  | -28.388 | 1.00 | 0.00 |
| ATOM<br>H | 1871 | HE1  | MET | X | 123 | -2.985 | 4.850  | -28.111 | 1.00 | 0.00 |
| ATOM<br>H | 1872 | HE2  | MET | X | 123 | -2.801 | 6.520  | -27.502 | 1.00 | 0.00 |
| ATOM<br>H | 1873 | HE3  | MET | X | 123 | -1.557 | 5.840  | -28.620 | 1.00 | 0.00 |
| ATOM<br>C | 1874 | C    | MET | X | 123 | -0.169 | 6.060  | -33.283 | 1.00 | 0.00 |
| ATOM<br>O | 1875 | O    | MET | X | 123 | 0.928  | 5.581  | -33.166 | 1.00 | 0.00 |



|           |      |      |     |   |     |       |        |         |      |      |
|-----------|------|------|-----|---|-----|-------|--------|---------|------|------|
| ATOM<br>O | 1901 | OE1  | GLN | X | 125 | 3.343 | 8.489  | -28.441 | 1.00 | 0.00 |
| ATOM<br>N | 1902 | NE2  | GLN | X | 125 | 4.254 | 10.646 | -28.423 | 1.00 | 0.00 |
| ATOM<br>H | 1903 | HE21 | GLN | X | 125 | 4.721 | 10.508 | -27.550 | 1.00 | 0.00 |
| ATOM<br>H | 1904 | HE22 | GLN | X | 125 | 4.644 | 11.278 | -29.094 | 1.00 | 0.00 |
| ATOM<br>C | 1905 | C    | GLN | X | 125 | 3.677 | 11.656 | -33.498 | 1.00 | 0.00 |
| ATOM<br>O | 1906 | O    | GLN | X | 125 | 4.471 | 11.226 | -34.323 | 1.00 | 0.00 |
| ATOM<br>N | 1907 | N    | SER | X | 126 | 3.417 | 13.031 | -33.322 | 1.00 | 0.00 |
| ATOM<br>H | 1908 | HN   | SER | X | 126 | 2.743 | 13.326 | -32.649 | 1.00 | 0.00 |
| ATOM<br>C | 1909 | CA   | SER | X | 126 | 4.014 | 14.149 | -34.107 | 1.00 | 0.00 |
| ATOM<br>H | 1910 | HA   | SER | X | 126 | 4.882 | 13.716 | -34.582 | 1.00 | 0.00 |
| ATOM<br>C | 1911 | CB   | SER | X | 126 | 2.967 | 14.610 | -35.168 | 1.00 | 0.00 |
| ATOM<br>H | 1912 | HB1  | SER | X | 126 | 2.168 | 15.154 | -34.621 | 1.00 | 0.00 |
| ATOM<br>H | 1913 | HB2  | SER | X | 126 | 2.709 | 13.739 | -35.808 | 1.00 | 0.00 |
| ATOM<br>O | 1914 | OG   | SER | X | 126 | 3.595 | 15.533 | -36.017 | 1.00 | 0.00 |
| ATOM<br>H | 1915 | HG1  | SER | X | 126 | 3.074 | 16.328 | -36.148 | 1.00 | 0.00 |
| ATOM<br>C | 1916 | C    | SER | X | 126 | 4.341 | 15.325 | -33.226 | 1.00 | 0.00 |
| ATOM<br>O | 1917 | O    | SER | X | 126 | 3.624 | 15.519 | -32.232 | 1.00 | 0.00 |
| ATOM<br>N | 1918 | N    | PRO | X | 127 | 5.431 | 16.063 | -33.418 | 1.00 | 0.00 |
| ATOM<br>C | 1919 | CD   | PRO | X | 127 | 5.648 | 17.299 | -32.673 | 1.00 | 0.00 |
| ATOM<br>H | 1920 | HD1  | PRO | X | 127 | 5.303 | 17.246 | -31.618 | 1.00 | 0.00 |
| ATOM<br>H | 1921 | HD2  | PRO | X | 127 | 5.227 | 18.220 | -33.130 | 1.00 | 0.00 |
| ATOM<br>C | 1922 | CA   | PRO | X | 127 | 6.626 | 15.599 | -34.185 | 1.00 | 0.00 |
| ATOM<br>H | 1923 | HA   | PRO | X | 127 | 6.155 | 15.383 | -35.132 | 1.00 | 0.00 |
| ATOM<br>C | 1924 | CB   | PRO | X | 127 | 7.605 | 16.823 | -34.070 | 1.00 | 0.00 |
| ATOM<br>H | 1925 | HB1  | PRO | X | 127 | 7.365 | 17.470 | -34.941 | 1.00 | 0.00 |

|           |      |     |     |   |     |        |        |         |      |      |
|-----------|------|-----|-----|---|-----|--------|--------|---------|------|------|
| ATOM<br>H | 1926 | HB2 | PRO | X | 127 | 8.699  | 16.628 | -34.087 | 1.00 | 0.00 |
| ATOM<br>C | 1927 | CG  | PRO | X | 127 | 7.173  | 17.618 | -32.769 | 1.00 | 0.00 |
| ATOM<br>H | 1928 | HG1 | PRO | X | 127 | 7.626  | 17.097 | -31.899 | 1.00 | 0.00 |
| ATOM<br>H | 1929 | HG2 | PRO | X | 127 | 7.315  | 18.717 | -32.696 | 1.00 | 0.00 |
| ATOM<br>C | 1930 | C   | PRO | X | 127 | 7.292  | 14.332 | -33.659 | 1.00 | 0.00 |
| ATOM<br>O | 1931 | O   | PRO | X | 127 | 7.148  | 13.841 | -32.533 | 1.00 | 0.00 |
| ATOM<br>N | 1932 | N   | SER | X | 128 | 8.054  | 13.719 | -34.535 | 1.00 | 0.00 |
| ATOM<br>H | 1933 | HN  | SER | X | 128 | 8.270  | 13.983 | -35.472 | 1.00 | 0.00 |
| ATOM<br>C | 1934 | CA  | SER | X | 128 | 8.761  | 12.454 | -34.100 | 1.00 | 0.00 |
| ATOM<br>H | 1935 | HA  | SER | X | 128 | 8.011  | 11.861 | -33.598 | 1.00 | 0.00 |
| ATOM<br>C | 1936 | CB  | SER | X | 128 | 9.282  | 11.593 | -35.288 | 1.00 | 0.00 |
| ATOM<br>H | 1937 | HB1 | SER | X | 128 | 9.917  | 12.336 | -35.818 | 1.00 | 0.00 |
| ATOM<br>H | 1938 | HB2 | SER | X | 128 | 8.484  | 11.327 | -36.014 | 1.00 | 0.00 |
| ATOM<br>O | 1939 | OG  | SER | X | 128 | 9.956  | 10.396 | -34.894 | 1.00 | 0.00 |
| ATOM<br>H | 1940 | HG1 | SER | X | 128 | 10.503 | 10.139 | -35.640 | 1.00 | 0.00 |
| ATOM<br>C | 1941 | C   | SER | X | 128 | 9.892  | 12.780 | -33.128 | 1.00 | 0.00 |
| ATOM<br>O | 1942 | O   | SER | X | 128 | 10.129 | 12.127 | -32.153 | 1.00 | 0.00 |
| ATOM<br>N | 1943 | N   | THR | X | 129 | 10.665 | 13.805 | -33.529 | 1.00 | 0.00 |
| ATOM<br>H | 1944 | HN  | THR | X | 129 | 10.322 | 14.327 | -34.306 | 1.00 | 0.00 |
| ATOM<br>C | 1945 | CA  | THR | X | 129 | 11.796 | 14.244 | -32.745 | 1.00 | 0.00 |
| ATOM<br>H | 1946 | HA  | THR | X | 129 | 11.565 | 14.001 | -31.718 | 1.00 | 0.00 |
| ATOM<br>C | 1947 | CB  | THR | X | 129 | 13.146 | 13.556 | -32.982 | 1.00 | 0.00 |
| ATOM<br>H | 1948 | HB  | THR | X | 129 | 13.040 | 12.495 | -32.671 | 1.00 | 0.00 |
| ATOM<br>O | 1949 | OG1 | THR | X | 129 | 14.193 | 14.079 | -32.150 | 1.00 | 0.00 |
| ATOM<br>H | 1950 | HG1 | THR | X | 129 | 14.974 | 13.561 | -32.357 | 1.00 | 0.00 |

|           |      |      |     |   |     |        |        |         |      |      |
|-----------|------|------|-----|---|-----|--------|--------|---------|------|------|
| ATOM<br>C | 1951 | CG2  | THR | X | 129 | 13.568 | 13.731 | -34.499 | 1.00 | 0.00 |
| ATOM<br>H | 1952 | HG21 | THR | X | 129 | 12.746 | 13.244 | -35.066 | 1.00 | 0.00 |
| ATOM<br>H | 1953 | HG22 | THR | X | 129 | 14.539 | 13.207 | -34.631 | 1.00 | 0.00 |
| ATOM<br>H | 1954 | HG23 | THR | X | 129 | 13.753 | 14.767 | -34.856 | 1.00 | 0.00 |
| ATOM<br>C | 1955 | C    | THR | X | 129 | 11.897 | 15.794 | -32.892 | 1.00 | 0.00 |
| ATOM<br>O | 1956 | O    | THR | X | 129 | 11.604 | 16.374 | -33.906 | 1.00 | 0.00 |
| ATOM<br>N | 1957 | N    | LEU | X | 130 | 12.202 | 16.443 | -31.806 | 1.00 | 0.00 |
| ATOM<br>H | 1958 | HN   | LEU | X | 130 | 12.418 | 15.868 | -31.021 | 1.00 | 0.00 |
| ATOM<br>C | 1959 | CA   | LEU | X | 130 | 12.306 | 17.867 | -31.685 | 1.00 | 0.00 |
| ATOM<br>H | 1960 | HA   | LEU | X | 130 | 12.303 | 18.347 | -32.653 | 1.00 | 0.00 |
| ATOM<br>C | 1961 | CB   | LEU | X | 130 | 11.100 | 18.344 | -30.846 | 1.00 | 0.00 |
| ATOM<br>H | 1962 | HB1  | LEU | X | 130 | 11.086 | 18.052 | -29.774 | 1.00 | 0.00 |
| ATOM<br>H | 1963 | HB2  | LEU | X | 130 | 10.193 | 17.965 | -31.362 | 1.00 | 0.00 |
| ATOM<br>C | 1964 | CG   | LEU | X | 130 | 11.041 | 19.855 | -30.757 | 1.00 | 0.00 |
| ATOM<br>H | 1965 | HG   | LEU | X | 130 | 11.880 | 20.237 | -30.136 | 1.00 | 0.00 |
| ATOM<br>C | 1966 | CD1  | LEU | X | 130 | 10.953 | 20.522 | -32.141 | 1.00 | 0.00 |
| ATOM<br>H | 1967 | HD11 | LEU | X | 130 | 10.026 | 20.219 | -32.673 | 1.00 | 0.00 |
| ATOM<br>H | 1968 | HD12 | LEU | X | 130 | 11.845 | 20.272 | -32.755 | 1.00 | 0.00 |
| ATOM<br>H | 1969 | HD13 | LEU | X | 130 | 10.937 | 21.629 | -32.052 | 1.00 | 0.00 |
| ATOM<br>C | 1970 | CD2  | LEU | X | 130 | 9.711  | 20.129 | -29.900 | 1.00 | 0.00 |
| ATOM<br>H | 1971 | HD21 | LEU | X | 130 | 9.857  | 19.582 | -28.944 | 1.00 | 0.00 |
| ATOM<br>H | 1972 | HD22 | LEU | X | 130 | 8.869  | 19.728 | -30.505 | 1.00 | 0.00 |
| ATOM<br>H | 1973 | HD23 | LEU | X | 130 | 9.625  | 21.224 | -29.731 | 1.00 | 0.00 |
| ATOM<br>C | 1974 | C    | LEU | X | 130 | 13.640 | 18.287 | -31.035 | 1.00 | 0.00 |
| ATOM<br>O | 1975 | O    | LEU | X | 130 | 14.003 | 17.678 | -30.005 | 1.00 | 0.00 |

|           |      |     |           |        |        |         |      |      |
|-----------|------|-----|-----------|--------|--------|---------|------|------|
| ATOM<br>N | 1976 | N   | SER X 131 | 14.403 | 19.215 | -31.621 | 1.00 | 0.00 |
| ATOM<br>H | 1977 | HN  | SER X 131 | 14.172 | 19.624 | -32.500 | 1.00 | 0.00 |
| ATOM<br>C | 1978 | CA  | SER X 131 | 15.628 | 19.647 | -30.962 | 1.00 | 0.00 |
| ATOM<br>H | 1979 | HA  | SER X 131 | 15.912 | 18.868 | -30.270 | 1.00 | 0.00 |
| ATOM<br>C | 1980 | CB  | SER X 131 | 16.689 | 19.782 | -31.968 | 1.00 | 0.00 |
| ATOM<br>H | 1981 | HB1 | SER X 131 | 16.606 | 20.700 | -32.588 | 1.00 | 0.00 |
| ATOM<br>H | 1982 | HB2 | SER X 131 | 16.684 | 18.873 | -32.606 | 1.00 | 0.00 |
| ATOM<br>O | 1983 | OG  | SER X 131 | 17.951 | 19.765 | -31.373 | 1.00 | 0.00 |
| ATOM<br>H | 1984 | HG1 | SER X 131 | 18.206 | 18.852 | -31.524 | 1.00 | 0.00 |
| ATOM<br>C | 1985 | C   | SER X 131 | 15.227 | 20.920 | -30.289 | 1.00 | 0.00 |
| ATOM<br>O | 1986 | O   | SER X 131 | 14.891 | 21.899 | -30.903 | 1.00 | 0.00 |
| ATOM<br>N | 1987 | N   | ALA X 132 | 15.204 | 20.983 | -28.928 | 1.00 | 0.00 |
| ATOM<br>H | 1988 | HN  | ALA X 132 | 15.524 | 20.310 | -28.265 | 1.00 | 0.00 |
| ATOM<br>C | 1989 | CA  | ALA X 132 | 14.643 | 22.141 | -28.172 | 1.00 | 0.00 |
| ATOM<br>H | 1990 | HA  | ALA X 132 | 14.801 | 22.983 | -28.829 | 1.00 | 0.00 |
| ATOM<br>C | 1991 | CB  | ALA X 132 | 13.160 | 21.961 | -27.860 | 1.00 | 0.00 |
| ATOM<br>H | 1992 | HB1 | ALA X 132 | 12.746 | 22.988 | -27.776 | 1.00 | 0.00 |
| ATOM<br>H | 1993 | HB2 | ALA X 132 | 12.795 | 21.271 | -27.070 | 1.00 | 0.00 |
| ATOM<br>H | 1994 | HB3 | ALA X 132 | 12.558 | 21.512 | -28.679 | 1.00 | 0.00 |
| ATOM<br>C | 1995 | C   | ALA X 132 | 15.578 | 22.559 | -27.046 | 1.00 | 0.00 |
| ATOM<br>O | 1996 | O   | ALA X 132 | 16.572 | 21.934 | -26.678 | 1.00 | 0.00 |
| ATOM<br>N | 1997 | N   | SER X 133 | 15.194 | 23.693 | -26.468 | 1.00 | 0.00 |
| ATOM<br>H | 1998 | HN  | SER X 133 | 14.403 | 24.198 | -26.804 | 1.00 | 0.00 |
| ATOM<br>C | 1999 | CA  | SER X 133 | 16.076 | 24.464 | -25.589 | 1.00 | 0.00 |
| ATOM<br>H | 2000 | HA  | SER X 133 | 16.842 | 23.844 | -25.148 | 1.00 | 0.00 |



|           |      |      |           |        |        |         |      |      |
|-----------|------|------|-----------|--------|--------|---------|------|------|
| ATOM<br>C | 2001 | CB   | SER X 133 | 16.659 | 25.563 | -26.512 | 1.00 | 0.00 |
| ATOM<br>H | 2002 | HB1  | SER X 133 | 15.816 | 26.139 | -26.949 | 1.00 | 0.00 |
| ATOM<br>H | 2003 | HB2  | SER X 133 | 17.170 | 25.133 | -27.400 | 1.00 | 0.00 |
| ATOM<br>O | 2004 | OG   | SER X 133 | 17.600 | 26.420 | -25.891 | 1.00 | 0.00 |
| ATOM<br>H | 2005 | HG1  | SER X 133 | 17.989 | 26.959 | -26.584 | 1.00 | 0.00 |
| ATOM<br>C | 2006 | C    | SER X 133 | 15.234 | 24.892 | -24.381 | 1.00 | 0.00 |
| ATOM<br>O | 2007 | O    | SER X 133 | 14.001 | 24.922 | -24.468 | 1.00 | 0.00 |
| ATOM<br>N | 2008 | N    | VAL X 134 | 16.048 | 25.305 | -23.329 | 1.00 | 0.00 |
| ATOM<br>H | 2009 | HN   | VAL X 134 | 17.040 | 25.222 | -23.262 | 1.00 | 0.00 |
| ATOM<br>C | 2010 | CA   | VAL X 134 | 15.481 | 26.052 | -22.122 | 1.00 | 0.00 |
| ATOM<br>H | 2011 | HA   | VAL X 134 | 14.792 | 25.429 | -21.571 | 1.00 | 0.00 |
| ATOM<br>C | 2012 | CB   | VAL X 134 | 16.568 | 26.415 | -21.127 | 1.00 | 0.00 |
| ATOM<br>H | 2013 | HB   | VAL X 134 | 17.143 | 27.243 | -21.592 | 1.00 | 0.00 |
| ATOM<br>C | 2014 | CG1  | VAL X 134 | 15.924 | 26.974 | -19.793 | 1.00 | 0.00 |
| ATOM<br>H | 2015 | HG11 | VAL X 134 | 15.385 | 26.132 | -19.308 | 1.00 | 0.00 |
| ATOM<br>H | 2016 | HG12 | VAL X 134 | 15.144 | 27.743 | -19.984 | 1.00 | 0.00 |
| ATOM<br>H | 2017 | HG13 | VAL X 134 | 16.701 | 27.215 | -19.037 | 1.00 | 0.00 |
| ATOM<br>C | 2018 | CG2  | VAL X 134 | 17.393 | 25.179 | -20.826 | 1.00 | 0.00 |
| ATOM<br>H | 2019 | HG21 | VAL X 134 | 16.652 | 24.516 | -20.330 | 1.00 | 0.00 |
| ATOM<br>H | 2020 | HG22 | VAL X 134 | 18.180 | 25.366 | -20.064 | 1.00 | 0.00 |
| ATOM<br>H | 2021 | HG23 | VAL X 134 | 17.954 | 24.777 | -21.696 | 1.00 | 0.00 |
| ATOM<br>C | 2022 | C    | VAL X 134 | 14.790 | 27.308 | -22.605 | 1.00 | 0.00 |
| ATOM<br>O | 2023 | O    | VAL X 134 | 15.374 | 28.213 | -23.197 | 1.00 | 0.00 |
| ATOM<br>N | 2024 | N    | GLY X 135 | 13.460 | 27.375 | -22.353 | 1.00 | 0.00 |
| ATOM<br>H | 2025 | HN   | GLY X 135 | 13.067 | 26.604 | -21.858 | 1.00 | 0.00 |

|           |      |     |           |        |        |         |      |      |
|-----------|------|-----|-----------|--------|--------|---------|------|------|
| ATOM<br>C | 2026 | CA  | GLY X 135 | 12.583 | 28.470 | -22.782 | 1.00 | 0.00 |
| ATOM<br>H | 2027 | HA1 | GLY X 135 | 13.050 | 29.342 | -23.217 | 1.00 | 0.00 |
| ATOM<br>H | 2028 | HA2 | GLY X 135 | 12.055 | 28.900 | -21.944 | 1.00 | 0.00 |
| ATOM<br>C | 2029 | C   | GLY X 135 | 11.481 | 28.054 | -23.845 | 1.00 | 0.00 |
| ATOM<br>O | 2030 | O   | GLY X 135 | 10.384 | 28.634 | -23.899 | 1.00 | 0.00 |
| ATOM<br>N | 2031 | N   | ASP X 136 | 11.808 | 26.922 | -24.560 | 1.00 | 0.00 |
| ATOM<br>H | 2032 | HN  | ASP X 136 | 12.618 | 26.372 | -24.373 | 1.00 | 0.00 |
| ATOM<br>C | 2033 | CA  | ASP X 136 | 10.962 | 26.464 | -25.577 | 1.00 | 0.00 |
| ATOM<br>H | 2034 | HA  | ASP X 136 | 10.599 | 27.321 | -26.125 | 1.00 | 0.00 |
| ATOM<br>C | 2035 | CB  | ASP X 136 | 11.629 | 25.479 | -26.576 | 1.00 | 0.00 |
| ATOM<br>H | 2036 | HB1 | ASP X 136 | 10.854 | 25.079 | -27.264 | 1.00 | 0.00 |
| ATOM<br>H | 2037 | HB2 | ASP X 136 | 11.984 | 24.598 | -25.999 | 1.00 | 0.00 |
| ATOM<br>C | 2038 | CG  | ASP X 136 | 12.814 | 26.065 | -27.328 | 1.00 | 0.00 |
| ATOM<br>O | 2039 | OD1 | ASP X 136 | 13.112 | 27.286 | -27.086 | 1.00 | 0.00 |
| ATOM<br>O | 2040 | OD2 | ASP X 136 | 13.480 | 25.239 | -28.000 | 1.00 | 0.00 |
| ATOM<br>C | 2041 | C   | ASP X 136 | 9.603  | 25.871 | -25.224 | 1.00 | 0.00 |
| ATOM<br>O | 2042 | O   | ASP X 136 | 9.435  | 24.999 | -24.442 | 1.00 | 0.00 |
| ATOM<br>N | 2043 | N   | ARG X 137 | 8.553  | 26.376 | -25.947 | 1.00 | 0.00 |
| ATOM<br>H | 2044 | HN  | ARG X 137 | 8.802  | 27.219 | -26.416 | 1.00 | 0.00 |
| ATOM<br>C | 2045 | CA  | ARG X 137 | 7.128  | 25.973 | -25.824 | 1.00 | 0.00 |
| ATOM<br>H | 2046 | HA  | ARG X 137 | 6.893  | 25.496 | -24.884 | 1.00 | 0.00 |
| ATOM<br>C | 2047 | CB  | ARG X 137 | 6.167  | 27.167 | -26.151 | 1.00 | 0.00 |
| ATOM<br>H | 2048 | HB1 | ARG X 137 | 5.192  | 26.845 | -26.575 | 1.00 | 0.00 |
| ATOM<br>H | 2049 | HB2 | ARG X 137 | 6.655  | 27.735 | -26.972 | 1.00 | 0.00 |
| ATOM<br>C | 2050 | CG  | ARG X 137 | 5.851  | 28.093 | -24.913 | 1.00 | 0.00 |

|           |      |      |     |   |     |       |        |         |      |      |
|-----------|------|------|-----|---|-----|-------|--------|---------|------|------|
| ATOM<br>H | 2051 | HG1  | ARG | X | 137 | 5.538 | 27.470 | -24.048 | 1.00 | 0.00 |
| ATOM<br>H | 2052 | HG2  | ARG | X | 137 | 4.936 | 28.672 | -25.160 | 1.00 | 0.00 |
| ATOM<br>C | 2053 | CD   | ARG | X | 137 | 7.024 | 28.981 | -24.606 | 1.00 | 0.00 |
| ATOM<br>H | 2054 | HD1  | ARG | X | 137 | 7.118 | 29.758 | -25.393 | 1.00 | 0.00 |
| ATOM<br>H | 2055 | HD2  | ARG | X | 137 | 7.944 | 28.401 | -24.377 | 1.00 | 0.00 |
| ATOM<br>N | 2056 | NE   | ARG | X | 137 | 6.660 | 29.761 | -23.432 | 1.00 | 0.00 |
| ATOM<br>H | 2057 | HE   | ARG | X | 137 | 5.750 | 29.792 | -23.018 | 1.00 | 0.00 |
| ATOM<br>C | 2058 | CZ   | ARG | X | 137 | 7.426 | 30.724 | -22.920 | 1.00 | 0.00 |
| ATOM<br>N | 2059 | NH1  | ARG | X | 137 | 8.677 | 30.815 | -23.188 | 1.00 | 0.00 |
| ATOM<br>H | 2060 | HH11 | ARG | X | 137 | 9.174 | 29.954 | -23.295 | 1.00 | 0.00 |
| ATOM<br>H | 2061 | HH12 | ARG | X | 137 | 9.131 | 31.429 | -22.543 | 1.00 | 0.00 |
| ATOM<br>N | 2062 | NH2  | ARG | X | 137 | 6.871 | 31.615 | -22.179 | 1.00 | 0.00 |
| ATOM<br>H | 2063 | HH21 | ARG | X | 137 | 5.918 | 31.423 | -21.944 | 1.00 | 0.00 |
| ATOM<br>H | 2064 | HH22 | ARG | X | 137 | 7.254 | 32.492 | -21.889 | 1.00 | 0.00 |
| ATOM<br>C | 2065 | C    | ARG | X | 137 | 6.854 | 24.863 | -26.805 | 1.00 | 0.00 |
| ATOM<br>O | 2066 | O    | ARG | X | 137 | 6.762 | 25.000 | -28.016 | 1.00 | 0.00 |
| ATOM<br>N | 2067 | N    | VAL | X | 138 | 6.665 | 23.739 | -26.249 | 1.00 | 0.00 |
| ATOM<br>H | 2068 | HN   | VAL | X | 138 | 6.603 | 23.633 | -25.259 | 1.00 | 0.00 |
| ATOM<br>C | 2069 | CA   | VAL | X | 138 | 6.597 | 22.439 | -26.964 | 1.00 | 0.00 |
| ATOM<br>H | 2070 | HA   | VAL | X | 138 | 6.747 | 22.501 | -28.032 | 1.00 | 0.00 |
| ATOM<br>C | 2071 | CB   | VAL | X | 138 | 7.489 | 21.448 | -26.345 | 1.00 | 0.00 |
| ATOM<br>H | 2072 | HB   | VAL | X | 138 | 7.328 | 21.418 | -25.246 | 1.00 | 0.00 |
| ATOM<br>C | 2073 | CG1  | VAL | X | 138 | 7.452 | 20.031 | -26.941 | 1.00 | 0.00 |
| ATOM<br>H | 2074 | HG11 | VAL | X | 138 | 8.224 | 19.382 | -26.476 | 1.00 | 0.00 |
| ATOM<br>H | 2075 | HG12 | VAL | X | 138 | 7.449 | 20.040 | -28.051 | 1.00 | 0.00 |

|           |      |      |           |        |        |         |      |      |
|-----------|------|------|-----------|--------|--------|---------|------|------|
| ATOM<br>H | 2076 | HG13 | VAL X 138 | 6.545  | 19.480 | -26.612 | 1.00 | 0.00 |
| ATOM<br>C | 2077 | CG2  | VAL X 138 | 8.971  | 21.889 | -26.563 | 1.00 | 0.00 |
| ATOM<br>H | 2078 | HG21 | VAL X 138 | 9.190  | 22.185 | -27.611 | 1.00 | 0.00 |
| ATOM<br>H | 2079 | HG22 | VAL X 138 | 9.657  | 21.061 | -26.286 | 1.00 | 0.00 |
| ATOM<br>H | 2080 | HG23 | VAL X 138 | 9.303  | 22.712 | -25.894 | 1.00 | 0.00 |
| ATOM<br>C | 2081 | C    | VAL X 138 | 5.272  | 21.866 | -26.872 | 1.00 | 0.00 |
| ATOM<br>O | 2082 | O    | VAL X 138 | 4.751  | 21.705 | -25.811 | 1.00 | 0.00 |
| ATOM<br>N | 2083 | N    | THR X 139 | 4.664  | 21.434 | -28.001 | 1.00 | 0.00 |
| ATOM<br>H | 2084 | HN   | THR X 139 | 5.045  | 21.569 | -28.912 | 1.00 | 0.00 |
| ATOM<br>C | 2085 | CA   | THR X 139 | 3.330  | 20.716 | -27.955 | 1.00 | 0.00 |
| ATOM<br>H | 2086 | HA   | THR X 139 | 3.097  | 20.472 | -26.929 | 1.00 | 0.00 |
| ATOM<br>C | 2087 | CB   | THR X 139 | 2.080  | 21.435 | -28.458 | 1.00 | 0.00 |
| ATOM<br>H | 2088 | HB   | THR X 139 | 2.293  | 21.999 | -29.391 | 1.00 | 0.00 |
| ATOM<br>O | 2089 | OG1  | THR X 139 | 1.730  | 22.349 | -27.471 | 1.00 | 0.00 |
| ATOM<br>H | 2090 | HG1  | THR X 139 | 2.335  | 23.078 | -27.625 | 1.00 | 0.00 |
| ATOM<br>C | 2091 | CG2  | THR X 139 | 0.826  | 20.505 | -28.718 | 1.00 | 0.00 |
| ATOM<br>H | 2092 | HG21 | THR X 139 | -0.015 | 21.222 | -28.837 | 1.00 | 0.00 |
| ATOM<br>H | 2093 | HG22 | THR X 139 | 0.625  | 19.998 | -27.750 | 1.00 | 0.00 |
| ATOM<br>H | 2094 | HG23 | THR X 139 | 0.889  | 19.915 | -29.657 | 1.00 | 0.00 |
| ATOM<br>C | 2095 | C    | THR X 139 | 3.499  | 19.438 | -28.805 | 1.00 | 0.00 |
| ATOM<br>O | 2096 | O    | THR X 139 | 4.019  | 19.505 | -29.919 | 1.00 | 0.00 |
| ATOM<br>N | 2097 | N    | ILE X 140 | 3.148  | 18.282 | -28.167 | 1.00 | 0.00 |
| ATOM<br>H | 2098 | HN   | ILE X 140 | 2.798  | 18.304 | -27.234 | 1.00 | 0.00 |
| ATOM<br>C | 2099 | CA   | ILE X 140 | 3.340  | 17.019 | -28.918 | 1.00 | 0.00 |
| ATOM<br>H | 2100 | HA   | ILE X 140 | 3.682  | 17.244 | -29.917 | 1.00 | 0.00 |

|           |      |      |           |        |        |         |      |      |
|-----------|------|------|-----------|--------|--------|---------|------|------|
| ATOM<br>C | 2101 | CB   | ILE X 140 | 4.111  | 16.117 | -28.114 | 1.00 | 0.00 |
| ATOM<br>H | 2102 | HB   | ILE X 140 | 3.585  | 15.917 | -27.157 | 1.00 | 0.00 |
| ATOM<br>C | 2103 | CG2  | ILE X 140 | 4.201  | 14.676 | -28.832 | 1.00 | 0.00 |
| ATOM<br>H | 2104 | HG21 | ILE X 140 | 4.690  | 14.053 | -28.053 | 1.00 | 0.00 |
| ATOM<br>H | 2105 | HG22 | ILE X 140 | 4.650  | 14.705 | -29.848 | 1.00 | 0.00 |
| ATOM<br>H | 2106 | HG23 | ILE X 140 | 3.176  | 14.251 | -28.891 | 1.00 | 0.00 |
| ATOM<br>C | 2107 | CG1  | ILE X 140 | 5.504  | 16.650 | -27.871 | 1.00 | 0.00 |
| ATOM<br>H | 2108 | HG11 | ILE X 140 | 5.649  | 17.704 | -27.552 | 1.00 | 0.00 |
| ATOM<br>H | 2109 | HG12 | ILE X 140 | 6.227  | 16.509 | -28.702 | 1.00 | 0.00 |
| ATOM<br>C | 2110 | CD   | ILE X 140 | 6.072  | 15.846 | -26.575 | 1.00 | 0.00 |
| ATOM<br>H | 2111 | HD1  | ILE X 140 | 6.244  | 14.768 | -26.780 | 1.00 | 0.00 |
| ATOM<br>H | 2112 | HD2  | ILE X 140 | 5.388  | 16.008 | -25.714 | 1.00 | 0.00 |
| ATOM<br>H | 2113 | HD3  | ILE X 140 | 7.084  | 16.228 | -26.318 | 1.00 | 0.00 |
| ATOM<br>C | 2114 | C    | ILE X 140 | 1.946  | 16.422 | -29.083 | 1.00 | 0.00 |
| ATOM<br>O | 2115 | O    | ILE X 140 | 1.097  | 16.453 | -28.226 | 1.00 | 0.00 |
| ATOM<br>N | 2116 | N    | THR X 141 | 1.666  | 15.845 | -30.276 | 1.00 | 0.00 |
| ATOM<br>H | 2117 | HN   | THR X 141 | 2.379  | 15.760 | -30.968 | 1.00 | 0.00 |
| ATOM<br>C | 2118 | CA   | THR X 141 | 0.360  | 15.569 | -30.744 | 1.00 | 0.00 |
| ATOM<br>H | 2119 | HA   | THR X 141 | -0.391 | 15.741 | -29.987 | 1.00 | 0.00 |
| ATOM<br>C | 2120 | CB   | THR X 141 | -0.054 | 16.374 | -31.973 | 1.00 | 0.00 |
| ATOM<br>H | 2121 | HB   | THR X 141 | 0.562  | 16.162 | -32.873 | 1.00 | 0.00 |
| ATOM<br>O | 2122 | OG1  | THR X 141 | 0.001  | 17.799 | -31.809 | 1.00 | 0.00 |
| ATOM<br>H | 2123 | HG1  | THR X 141 | 0.949  | 17.944 | -31.781 | 1.00 | 0.00 |
| ATOM<br>C | 2124 | CG2  | THR X 141 | -1.575 | 16.117 | -32.247 | 1.00 | 0.00 |
| ATOM<br>H | 2125 | HG21 | THR X 141 | -1.924 | 16.736 | -33.101 | 1.00 | 0.00 |









|           |      |      |           |         |       |         |      |      |
|-----------|------|------|-----------|---------|-------|---------|------|------|
| ATOM<br>O | 2201 | O    | GLN X 146 | -9.478  | 5.648 | -32.266 | 1.00 | 0.00 |
| ATOM<br>N | 2202 | N    | SER X 147 | -11.631 | 6.229 | -32.693 | 1.00 | 0.00 |
| ATOM<br>H | 2203 | HN   | SER X 147 | -12.437 | 6.162 | -33.276 | 1.00 | 0.00 |
| ATOM<br>C | 2204 | CA   | SER X 147 | -11.870 | 7.176 | -31.607 | 1.00 | 0.00 |
| ATOM<br>H | 2205 | HA   | SER X 147 | -11.112 | 7.937 | -31.722 | 1.00 | 0.00 |
| ATOM<br>C | 2206 | CB   | SER X 147 | -13.229 | 7.936 | -31.684 | 1.00 | 0.00 |
| ATOM<br>H | 2207 | HB1  | SER X 147 | -13.179 | 8.678 | -30.858 | 1.00 | 0.00 |
| ATOM<br>H | 2208 | HB2  | SER X 147 | -14.015 | 7.218 | -31.366 | 1.00 | 0.00 |
| ATOM<br>O | 2209 | OG   | SER X 147 | -13.545 | 8.631 | -32.866 | 1.00 | 0.00 |
| ATOM<br>H | 2210 | HG1  | SER X 147 | -13.675 | 7.957 | -33.537 | 1.00 | 0.00 |
| ATOM<br>C | 2211 | C    | SER X 147 | -11.739 | 6.456 | -30.244 | 1.00 | 0.00 |
| ATOM<br>O | 2212 | O    | SER X 147 | -12.220 | 5.390 | -29.991 | 1.00 | 0.00 |
| ATOM<br>N | 2213 | N    | ILE X 148 | -11.001 | 7.069 | -29.282 | 1.00 | 0.00 |
| ATOM<br>H | 2214 | HN   | ILE X 148 | -10.503 | 7.911 | -29.479 | 1.00 | 0.00 |
| ATOM<br>C | 2215 | CA   | ILE X 148 | -10.705 | 6.507 | -27.973 | 1.00 | 0.00 |
| ATOM<br>H | 2216 | HA   | ILE X 148 | -11.188 | 5.559 | -27.786 | 1.00 | 0.00 |
| ATOM<br>C | 2217 | CB   | ILE X 148 | -9.292  | 6.185 | -27.796 | 1.00 | 0.00 |
| ATOM<br>H | 2218 | HB   | ILE X 148 | -8.964  | 5.665 | -26.871 | 1.00 | 0.00 |
| ATOM<br>C | 2219 | CG2  | ILE X 148 | -8.875  | 5.095 | -28.830 | 1.00 | 0.00 |
| ATOM<br>H | 2220 | HG21 | ILE X 148 | -7.889  | 4.662 | -28.556 | 1.00 | 0.00 |
| ATOM<br>H | 2221 | HG22 | ILE X 148 | -8.695  | 5.585 | -29.811 | 1.00 | 0.00 |
| ATOM<br>H | 2222 | HG23 | ILE X 148 | -9.665  | 4.325 | -28.958 | 1.00 | 0.00 |
| ATOM<br>C | 2223 | CG1  | ILE X 148 | -8.484  | 7.471 | -28.186 | 1.00 | 0.00 |
| ATOM<br>H | 2224 | HG11 | ILE X 148 | -8.915  | 8.358 | -27.672 | 1.00 | 0.00 |
| ATOM<br>H | 2225 | HG12 | ILE X 148 | -8.426  | 7.681 | -29.275 | 1.00 | 0.00 |



|           |      |      |     |   |     |         |        |         |      |      |
|-----------|------|------|-----|---|-----|---------|--------|---------|------|------|
| ATOM<br>O | 2251 | OD1  | ASN | X | 150 | -12.793 | 13.161 | -23.648 | 1.00 | 0.00 |
| ATOM<br>N | 2252 | ND2  | ASN | X | 150 | -12.335 | 14.009 | -21.589 | 1.00 | 0.00 |
| ATOM<br>H | 2253 | HD21 | ASN | X | 150 | -12.685 | 14.858 | -21.985 | 1.00 | 0.00 |
| ATOM<br>H | 2254 | HD22 | ASN | X | 150 | -11.685 | 14.138 | -20.840 | 1.00 | 0.00 |
| ATOM<br>C | 2255 | C    | ASN | X | 150 | -9.954  | 9.903  | -22.878 | 1.00 | 0.00 |
| ATOM<br>O | 2256 | O    | ASN | X | 150 | -9.038  | 10.276 | -22.170 | 1.00 | 0.00 |
| ATOM<br>N | 2257 | N    | TRP | X | 151 | -10.137 | 8.679  | -23.307 | 1.00 | 0.00 |
| ATOM<br>H | 2258 | HN   | TRP | X | 151 | -10.703 | 8.452  | -24.095 | 1.00 | 0.00 |
| ATOM<br>C | 2259 | CA   | TRP | X | 151 | -9.479  | 7.543  | -22.736 | 1.00 | 0.00 |
| ATOM<br>H | 2260 | HA   | TRP | X | 151 | -9.376  | 7.869  | -21.712 | 1.00 | 0.00 |
| ATOM<br>C | 2261 | CB   | TRP | X | 151 | -10.244 | 6.229  | -22.778 | 1.00 | 0.00 |
| ATOM<br>H | 2262 | HB1  | TRP | X | 151 | -9.807  | 5.576  | -21.993 | 1.00 | 0.00 |
| ATOM<br>H | 2263 | HB2  | TRP | X | 151 | -10.125 | 5.698  | -23.747 | 1.00 | 0.00 |
| ATOM<br>C | 2264 | CG   | TRP | X | 151 | -11.734 | 6.451  | -22.501 | 1.00 | 0.00 |
| ATOM<br>C | 2265 | CD1  | TRP | X | 151 | -12.754 | 5.669  | -22.993 | 1.00 | 0.00 |
| ATOM<br>H | 2266 | HD1  | TRP | X | 151 | -12.753 | 4.923  | -23.773 | 1.00 | 0.00 |
| ATOM<br>N | 2267 | NE1  | TRP | X | 151 | -14.026 | 6.118  | -22.550 | 1.00 | 0.00 |
| ATOM<br>H | 2268 | HE1  | TRP | X | 151 | -14.873 | 5.853  | -22.956 | 1.00 | 0.00 |
| ATOM<br>C | 2269 | CE2  | TRP | X | 151 | -13.850 | 7.106  | -21.661 | 1.00 | 0.00 |
| ATOM<br>C | 2270 | CD2  | TRP | X | 151 | -12.426 | 7.344  | -21.583 | 1.00 | 0.00 |
| ATOM<br>C | 2271 | CE3  | TRP | X | 151 | -11.971 | 8.220  | -20.632 | 1.00 | 0.00 |
| ATOM<br>H | 2272 | HE3  | TRP | X | 151 | -10.923 | 8.213  | -20.370 | 1.00 | 0.00 |
| ATOM<br>C | 2273 | CZ3  | TRP | X | 151 | -12.880 | 8.957  | -19.880 | 1.00 | 0.00 |
| ATOM<br>H | 2274 | HZ3  | TRP | X | 151 | -12.613 | 9.613  | -19.064 | 1.00 | 0.00 |
| ATOM<br>C | 2275 | CZ2  | TRP | X | 151 | -14.732 | 7.939  | -21.028 | 1.00 | 0.00 |

|           |      |      |     |   |     |         |        |         |      |      |
|-----------|------|------|-----|---|-----|---------|--------|---------|------|------|
| ATOM<br>H | 2276 | HZ2  | TRP | X | 151 | -15.804 | 7.856  | -21.130 | 1.00 | 0.00 |
| ATOM<br>C | 2277 | CH2  | TRP | X | 151 | -14.287 | 8.851  | -20.007 | 1.00 | 0.00 |
| ATOM<br>H | 2278 | HH2  | TRP | X | 151 | -15.032 | 9.385  | -19.436 | 1.00 | 0.00 |
| ATOM<br>C | 2279 | C    | TRP | X | 151 | -8.000  | 7.257  | -23.078 | 1.00 | 0.00 |
| ATOM<br>O | 2280 | O    | TRP | X | 151 | -7.678  | 6.217  | -23.620 | 1.00 | 0.00 |
| ATOM<br>N | 2281 | N    | LEU | X | 152 | -7.010  | 8.188  | -22.671 | 1.00 | 0.00 |
| ATOM<br>H | 2282 | HN   | LEU | X | 152 | -7.183  | 8.975  | -22.084 | 1.00 | 0.00 |
| ATOM<br>C | 2283 | CA   | LEU | X | 152 | -5.626  | 8.022  | -22.990 | 1.00 | 0.00 |
| ATOM<br>H | 2284 | HA   | LEU | X | 152 | -5.293  | 7.003  | -23.122 | 1.00 | 0.00 |
| ATOM<br>C | 2285 | CB   | LEU | X | 152 | -5.458  | 8.800  | -24.284 | 1.00 | 0.00 |
| ATOM<br>H | 2286 | HB1  | LEU | X | 152 | -5.994  | 9.770  | -24.200 | 1.00 | 0.00 |
| ATOM<br>H | 2287 | HB2  | LEU | X | 152 | -5.966  | 8.211  | -25.077 | 1.00 | 0.00 |
| ATOM<br>C | 2288 | CG   | LEU | X | 152 | -4.000  | 8.964  | -24.878 | 1.00 | 0.00 |
| ATOM<br>H | 2289 | HG   | LEU | X | 152 | -3.422  | 8.074  | -24.550 | 1.00 | 0.00 |
| ATOM<br>C | 2290 | CD1  | LEU | X | 152 | -4.084  | 9.113  | -26.397 | 1.00 | 0.00 |
| ATOM<br>H | 2291 | HD11 | LEU | X | 152 | -3.124  | 9.504  | -26.796 | 1.00 | 0.00 |
| ATOM<br>H | 2292 | HD12 | LEU | X | 152 | -4.763  | 9.969  | -26.599 | 1.00 | 0.00 |
| ATOM<br>H | 2293 | HD13 | LEU | X | 152 | -4.437  | 8.154  | -26.832 | 1.00 | 0.00 |
| ATOM<br>C | 2294 | CD2  | LEU | X | 152 | -3.338  | 10.255 | -24.304 | 1.00 | 0.00 |
| ATOM<br>H | 2295 | HD21 | LEU | X | 152 | -4.025  | 11.113 | -24.467 | 1.00 | 0.00 |
| ATOM<br>H | 2296 | HD22 | LEU | X | 152 | -2.269  | 10.363 | -24.587 | 1.00 | 0.00 |
| ATOM<br>H | 2297 | HD23 | LEU | X | 152 | -3.290  | 10.136 | -23.200 | 1.00 | 0.00 |
| ATOM<br>C | 2298 | C    | LEU | X | 152 | -4.831  | 8.581  | -21.834 | 1.00 | 0.00 |
| ATOM<br>O | 2299 | O    | LEU | X | 152 | -5.316  | 9.497  | -21.142 | 1.00 | 0.00 |
| ATOM<br>N | 2300 | N    | ALA | X | 153 | -3.576  | 8.109  | -21.579 | 1.00 | 0.00 |

|           |      |     |           |        |        |         |      |      |
|-----------|------|-----|-----------|--------|--------|---------|------|------|
| ATOM<br>H | 2301 | HN  | ALA X 153 | -3.202 | 7.499  | -22.273 | 1.00 | 0.00 |
| ATOM<br>C | 2302 | CA  | ALA X 153 | -2.699 | 8.476  | -20.566 | 1.00 | 0.00 |
| ATOM<br>H | 2303 | HA  | ALA X 153 | -2.999 | 9.385  | -20.065 | 1.00 | 0.00 |
| ATOM<br>C | 2304 | CB  | ALA X 153 | -2.467 | 7.167  | -19.803 | 1.00 | 0.00 |
| ATOM<br>H | 2305 | HB1 | ALA X 153 | -2.124 | 6.360  | -20.485 | 1.00 | 0.00 |
| ATOM<br>H | 2306 | HB2 | ALA X 153 | -3.393 | 6.873  | -19.264 | 1.00 | 0.00 |
| ATOM<br>H | 2307 | HB3 | ALA X 153 | -1.643 | 7.351  | -19.081 | 1.00 | 0.00 |
| ATOM<br>C | 2308 | C   | ALA X 153 | -1.362 | 8.962  | -21.241 | 1.00 | 0.00 |
| ATOM<br>O | 2309 | O   | ALA X 153 | -1.098 | 8.623  | -22.434 | 1.00 | 0.00 |
| ATOM<br>N | 2310 | N   | TRP X 154 | -0.539 | 9.862  | -20.622 | 1.00 | 0.00 |
| ATOM<br>H | 2311 | HN  | TRP X 154 | -0.961 | 10.084 | -19.747 | 1.00 | 0.00 |
| ATOM<br>C | 2312 | CA  | TRP X 154 | 0.759  | 10.318 | -21.182 | 1.00 | 0.00 |
| ATOM<br>H | 2313 | HA  | TRP X 154 | 0.960  | 9.764  | -22.088 | 1.00 | 0.00 |
| ATOM<br>C | 2314 | CB  | TRP X 154 | 0.811  | 11.768 | -21.691 | 1.00 | 0.00 |
| ATOM<br>H | 2315 | HB1 | TRP X 154 | 1.868  | 11.969 | -21.969 | 1.00 | 0.00 |
| ATOM<br>H | 2316 | HB2 | TRP X 154 | 0.504  | 12.528 | -20.941 | 1.00 | 0.00 |
| ATOM<br>C | 2317 | CG  | TRP X 154 | 0.055  | 12.180 | -22.981 | 1.00 | 0.00 |
| ATOM<br>C | 2318 | CD1 | TRP X 154 | -1.111 | 12.859 | -23.036 | 1.00 | 0.00 |
| ATOM<br>H | 2319 | HD1 | TRP X 154 | -1.816 | 12.892 | -22.219 | 1.00 | 0.00 |
| ATOM<br>N | 2320 | NE1 | TRP X 154 | -1.369 | 13.234 | -24.286 | 1.00 | 0.00 |
| ATOM<br>H | 2321 | HE1 | TRP X 154 | -2.048 | 13.895 | -24.522 | 1.00 | 0.00 |
| ATOM<br>C | 2322 | CE2 | TRP X 154 | -0.270 | 12.993 | -25.072 | 1.00 | 0.00 |
| ATOM<br>C | 2323 | CD2 | TRP X 154 | 0.648  | 12.318 | -24.246 | 1.00 | 0.00 |
| ATOM<br>C | 2324 | CE3 | TRP X 154 | 1.922  | 11.998 | -24.758 | 1.00 | 0.00 |
| ATOM<br>H | 2325 | HE3 | TRP X 154 | 2.654  | 11.451 | -24.181 | 1.00 | 0.00 |

|           |      |     |     |   |     |        |        |         |      |      |
|-----------|------|-----|-----|---|-----|--------|--------|---------|------|------|
| ATOM<br>C | 2326 | CZ3 | TRP | X | 154 | 2.219  | 12.398 | -26.098 | 1.00 | 0.00 |
| ATOM<br>H | 2327 | HZ3 | TRP | X | 154 | 3.203  | 12.133 | -26.455 | 1.00 | 0.00 |
| ATOM<br>C | 2328 | CZ2 | TRP | X | 154 | 0.039  | 13.442 | -26.338 | 1.00 | 0.00 |
| ATOM<br>H | 2329 | HZ2 | TRP | X | 154 | -0.550 | 14.129 | -26.926 | 1.00 | 0.00 |
| ATOM<br>C | 2330 | CH2 | TRP | X | 154 | 1.334  | 13.225 | -26.776 | 1.00 | 0.00 |
| ATOM<br>H | 2331 | HH2 | TRP | X | 154 | 1.688  | 13.451 | -27.771 | 1.00 | 0.00 |
| ATOM<br>C | 2332 | C   | TRP | X | 154 | 1.916  | 10.206 | -20.297 | 1.00 | 0.00 |
| ATOM<br>O | 2333 | O   | TRP | X | 154 | 1.942  | 10.631 | -19.144 | 1.00 | 0.00 |
| ATOM<br>N | 2334 | N   | PHE | X | 155 | 3.018  | 9.573  | -20.930 | 1.00 | 0.00 |
| ATOM<br>H | 2335 | HN  | PHE | X | 155 | 2.988  | 9.282  | -21.883 | 1.00 | 0.00 |
| ATOM<br>C | 2336 | CA  | PHE | X | 155 | 4.296  | 9.262  | -20.242 | 1.00 | 0.00 |
| ATOM<br>H | 2337 | HA  | PHE | X | 155 | 4.234  | 9.462  | -19.183 | 1.00 | 0.00 |
| ATOM<br>C | 2338 | CB  | PHE | X | 155 | 4.594  | 7.780  | -20.508 | 1.00 | 0.00 |
| ATOM<br>H | 2339 | HB1 | PHE | X | 155 | 5.569  | 7.458  | -20.083 | 1.00 | 0.00 |
| ATOM<br>H | 2340 | HB2 | PHE | X | 155 | 4.691  | 7.631  | -21.605 | 1.00 | 0.00 |
| ATOM<br>C | 2341 | CG  | PHE | X | 155 | 3.607  | 6.789  | -19.911 | 1.00 | 0.00 |
| ATOM<br>C | 2342 | CD1 | PHE | X | 155 | 3.038  | 5.738  | -20.651 | 1.00 | 0.00 |
| ATOM<br>H | 2343 | HD1 | PHE | X | 155 | 3.156  | 5.681  | -21.723 | 1.00 | 0.00 |
| ATOM<br>C | 2344 | CE1 | PHE | X | 155 | 2.270  | 4.719  | -19.998 | 1.00 | 0.00 |
| ATOM<br>H | 2345 | HE1 | PHE | X | 155 | 1.806  | 3.980  | -20.634 | 1.00 | 0.00 |
| ATOM<br>C | 2346 | CZ  | PHE | X | 155 | 2.257  | 4.729  | -18.578 | 1.00 | 0.00 |
| ATOM<br>H | 2347 | HZ  | PHE | X | 155 | 1.764  | 3.933  | -18.040 | 1.00 | 0.00 |
| ATOM<br>C | 2348 | CD2 | PHE | X | 155 | 3.447  | 6.781  | -18.518 | 1.00 | 0.00 |
| ATOM<br>H | 2349 | HD2 | PHE | X | 155 | 3.834  | 7.593  | -17.919 | 1.00 | 0.00 |
| ATOM<br>C | 2350 | CE2 | PHE | X | 155 | 2.946  | 5.695  | -17.796 | 1.00 | 0.00 |

|           |      |      |     |   |     |        |        |         |      |      |
|-----------|------|------|-----|---|-----|--------|--------|---------|------|------|
| ATOM<br>H | 2351 | HE2  | PHE | X | 155 | 3.061  | 5.664  | -16.722 | 1.00 | 0.00 |
| ATOM<br>C | 2352 | C    | PHE | X | 155 | 5.586  | 9.953  | -20.604 | 1.00 | 0.00 |
| ATOM<br>O | 2353 | O    | PHE | X | 155 | 5.894  | 9.981  | -21.828 | 1.00 | 0.00 |
| ATOM<br>N | 2354 | N    | GLN | X | 156 | 6.384  | 10.474 | -19.679 | 1.00 | 0.00 |
| ATOM<br>H | 2355 | HN   | GLN | X | 156 | 6.051  | 10.569 | -18.744 | 1.00 | 0.00 |
| ATOM<br>C | 2356 | CA   | GLN | X | 156 | 7.712  | 10.990 | -19.809 | 1.00 | 0.00 |
| ATOM<br>H | 2357 | HA   | GLN | X | 156 | 7.865  | 11.282 | -20.837 | 1.00 | 0.00 |
| ATOM<br>C | 2358 | CB   | GLN | X | 156 | 7.954  | 12.123 | -18.780 | 1.00 | 0.00 |
| ATOM<br>H | 2359 | HB1  | GLN | X | 156 | 7.759  | 11.731 | -17.759 | 1.00 | 0.00 |
| ATOM<br>H | 2360 | HB2  | GLN | X | 156 | 7.191  | 12.920 | -18.912 | 1.00 | 0.00 |
| ATOM<br>C | 2361 | CG   | GLN | X | 156 | 9.495  | 12.544 | -18.883 | 1.00 | 0.00 |
| ATOM<br>H | 2362 | HG1  | GLN | X | 156 | 9.725  | 13.043 | -19.849 | 1.00 | 0.00 |
| ATOM<br>H | 2363 | HG2  | GLN | X | 156 | 10.206 | 11.696 | -18.789 | 1.00 | 0.00 |
| ATOM<br>C | 2364 | CD   | GLN | X | 156 | 9.790  | 13.434 | -17.632 | 1.00 | 0.00 |
| ATOM<br>O | 2365 | OE1  | GLN | X | 156 | 10.553 | 13.025 | -16.713 | 1.00 | 0.00 |
| ATOM<br>N | 2366 | NE2  | GLN | X | 156 | 9.192  | 14.653 | -17.647 | 1.00 | 0.00 |
| ATOM<br>H | 2367 | HE21 | GLN | X | 156 | 8.738  | 14.990 | -18.472 | 1.00 | 0.00 |
| ATOM<br>H | 2368 | HE22 | GLN | X | 156 | 9.549  | 15.290 | -16.964 | 1.00 | 0.00 |
| ATOM<br>C | 2369 | C    | GLN | X | 156 | 8.656  | 9.820  | -19.579 | 1.00 | 0.00 |
| ATOM<br>O | 2370 | O    | GLN | X | 156 | 8.641  | 9.226  | -18.477 | 1.00 | 0.00 |
| ATOM<br>N | 2371 | N    | GLN | X | 157 | 9.531  | 9.508  | -20.565 | 1.00 | 0.00 |
| ATOM<br>H | 2372 | HN   | GLN | X | 157 | 9.426  | 9.971  | -21.442 | 1.00 | 0.00 |
| ATOM<br>C | 2373 | CA   | GLN | X | 157 | 10.579 | 8.556  | -20.335 | 1.00 | 0.00 |
| ATOM<br>H | 2374 | HA   | GLN | X | 157 | 10.490 | 8.172  | -19.330 | 1.00 | 0.00 |
| ATOM<br>C | 2375 | CB   | GLN | X | 157 | 10.339 | 7.284  | -21.240 | 1.00 | 0.00 |

|           |      |      |     |   |     |        |        |         |      |      |
|-----------|------|------|-----|---|-----|--------|--------|---------|------|------|
| ATOM<br>H | 2376 | HB1  | GLN | X | 157 | 10.118 | 7.710  | -22.242 | 1.00 | 0.00 |
| ATOM<br>H | 2377 | HB2  | GLN | X | 157 | 9.524  | 6.634  | -20.855 | 1.00 | 0.00 |
| ATOM<br>C | 2378 | CG   | GLN | X | 157 | 11.558 | 6.344  | -21.170 | 1.00 | 0.00 |
| ATOM<br>H | 2379 | HG1  | GLN | X | 157 | 11.921 | 6.315  | -20.120 | 1.00 | 0.00 |
| ATOM<br>H | 2380 | HG2  | GLN | X | 157 | 12.401 | 6.795  | -21.736 | 1.00 | 0.00 |
| ATOM<br>C | 2381 | CD   | GLN | X | 157 | 11.280 | 5.010  | -21.820 | 1.00 | 0.00 |
| ATOM<br>O | 2382 | OE1  | GLN | X | 157 | 11.031 | 4.822  | -22.991 | 1.00 | 0.00 |
| ATOM<br>N | 2383 | NE2  | GLN | X | 157 | 11.214 | 4.013  | -20.903 | 1.00 | 0.00 |
| ATOM<br>H | 2384 | HE21 | GLN | X | 157 | 10.978 | 3.130  | -21.308 | 1.00 | 0.00 |
| ATOM<br>H | 2385 | HE22 | GLN | X | 157 | 11.564 | 4.114  | -19.972 | 1.00 | 0.00 |
| ATOM<br>C | 2386 | C    | GLN | X | 157 | 11.946 | 9.124  | -20.415 | 1.00 | 0.00 |
| ATOM<br>O | 2387 | O    | GLN | X | 157 | 12.391 | 9.472  | -21.495 | 1.00 | 0.00 |
| ATOM<br>N | 2388 | N    | LYS | X | 158 | 12.627 | 9.253  | -19.280 | 1.00 | 0.00 |
| ATOM<br>H | 2389 | HN   | LYS | X | 158 | 12.053 | 9.253  | -18.465 | 1.00 | 0.00 |
| ATOM<br>C | 2390 | CA   | LYS | X | 158 | 14.069 | 9.637  | -19.253 | 1.00 | 0.00 |
| ATOM<br>H | 2391 | HA   | LYS | X | 158 | 14.263 | 10.437 | -19.952 | 1.00 | 0.00 |
| ATOM<br>C | 2392 | CB   | LYS | X | 158 | 14.413 | 10.107 | -17.847 | 1.00 | 0.00 |
| ATOM<br>H | 2393 | HB1  | LYS | X | 158 | 15.424 | 10.569 | -17.826 | 1.00 | 0.00 |
| ATOM<br>H | 2394 | HB2  | LYS | X | 158 | 14.345 | 9.206  | -17.201 | 1.00 | 0.00 |
| ATOM<br>C | 2395 | CG   | LYS | X | 158 | 13.521 | 11.232 | -17.225 | 1.00 | 0.00 |
| ATOM<br>H | 2396 | HG1  | LYS | X | 158 | 13.771 | 11.553 | -16.191 | 1.00 | 0.00 |
| ATOM<br>H | 2397 | HG2  | LYS | X | 158 | 12.457 | 10.915 | -17.211 | 1.00 | 0.00 |
| ATOM<br>C | 2398 | CD   | LYS | X | 158 | 13.617 | 12.442 | -18.125 | 1.00 | 0.00 |
| ATOM<br>H | 2399 | HD1  | LYS | X | 158 | 12.664 | 12.991 | -17.971 | 1.00 | 0.00 |
| ATOM<br>H | 2400 | HD2  | LYS | X | 158 | 13.486 | 12.244 | -19.210 | 1.00 | 0.00 |













|           |      |      |           |        |        |         |      |      |
|-----------|------|------|-----------|--------|--------|---------|------|------|
| ATOM<br>H | 2526 | HG   | LEU X 166 | 4.515  | 12.532 | -17.943 | 1.00 | 0.00 |
| ATOM<br>C | 2527 | CD1  | LEU X 166 | 4.801  | 14.221 | -19.167 | 1.00 | 0.00 |
| ATOM<br>H | 2528 | HD11 | LEU X 166 | 5.902  | 14.152 | -19.295 | 1.00 | 0.00 |
| ATOM<br>H | 2529 | HD12 | LEU X 166 | 4.493  | 15.259 | -18.918 | 1.00 | 0.00 |
| ATOM<br>H | 2530 | HD13 | LEU X 166 | 4.194  | 13.901 | -20.041 | 1.00 | 0.00 |
| ATOM<br>C | 2531 | CD2  | LEU X 166 | 5.171  | 14.282 | -16.767 | 1.00 | 0.00 |
| ATOM<br>H | 2532 | HD21 | LEU X 166 | 4.848  | 15.337 | -16.632 | 1.00 | 0.00 |
| ATOM<br>H | 2533 | HD22 | LEU X 166 | 6.239  | 14.208 | -17.065 | 1.00 | 0.00 |
| ATOM<br>H | 2534 | HD23 | LEU X 166 | 5.157  | 13.796 | -15.768 | 1.00 | 0.00 |
| ATOM<br>C | 2535 | C    | LEU X 166 | 0.607  | 13.244 | -16.603 | 1.00 | 0.00 |
| ATOM<br>O | 2536 | O    | LEU X 166 | 0.097  | 14.134 | -15.947 | 1.00 | 0.00 |
| ATOM<br>N | 2537 | N    | ILE X 167 | -0.052 | 12.553 | -17.550 | 1.00 | 0.00 |
| ATOM<br>H | 2538 | HN   | ILE X 167 | 0.315  | 11.908 | -18.215 | 1.00 | 0.00 |
| ATOM<br>C | 2539 | CA   | ILE X 167 | -1.435 | 12.873 | -17.873 | 1.00 | 0.00 |
| ATOM<br>H | 2540 | HA   | ILE X 167 | -1.776 | 13.676 | -17.237 | 1.00 | 0.00 |
| ATOM<br>C | 2541 | CB   | ILE X 167 | -1.593 | 13.418 | -19.294 | 1.00 | 0.00 |
| ATOM<br>H | 2542 | HB   | ILE X 167 | -1.376 | 12.541 | -19.940 | 1.00 | 0.00 |
| ATOM<br>C | 2543 | CG2  | ILE X 167 | -3.003 | 13.812 | -19.591 | 1.00 | 0.00 |
| ATOM<br>H | 2544 | HG21 | ILE X 167 | -3.547 | 12.930 | -19.989 | 1.00 | 0.00 |
| ATOM<br>H | 2545 | HG22 | ILE X 167 | -3.060 | 14.522 | -20.443 | 1.00 | 0.00 |
| ATOM<br>H | 2546 | HG23 | ILE X 167 | -3.435 | 14.282 | -18.682 | 1.00 | 0.00 |
| ATOM<br>C | 2547 | CG1  | ILE X 167 | -0.642 | 14.638 | -19.551 | 1.00 | 0.00 |
| ATOM<br>H | 2548 | HG11 | ILE X 167 | -0.851 | 14.952 | -20.597 | 1.00 | 0.00 |
| ATOM<br>H | 2549 | HG12 | ILE X 167 | 0.417  | 14.385 | -19.332 | 1.00 | 0.00 |
| ATOM<br>C | 2550 | CD   | ILE X 167 | -0.911 | 15.885 | -18.658 | 1.00 | 0.00 |



|      |      |     |           |         |        |         |      |      |
|------|------|-----|-----------|---------|--------|---------|------|------|
| ATOM | 2576 | O   | TYR X 168 | -5.957  | 12.520 | -17.476 | 1.00 | 0.00 |
| ATOM | 2577 | N   | GLU X 169 | -6.789  | 10.555 | -17.932 | 1.00 | 0.00 |
| ATOM | 2578 | HN  | GLU X 169 | -6.836  | 9.579  | -17.733 | 1.00 | 0.00 |
| ATOM | 2579 | CA  | GLU X 169 | -7.933  | 10.921 | -18.707 | 1.00 | 0.00 |
| ATOM | 2580 | HA  | GLU X 169 | -8.202  | 10.008 | -19.218 | 1.00 | 0.00 |
| ATOM | 2581 | CB  | GLU X 169 | -9.097  | 11.314 | -17.716 | 1.00 | 0.00 |
| ATOM | 2582 | HB1 | GLU X 169 | -9.802  | 12.062 | -18.138 | 1.00 | 0.00 |
| ATOM | 2583 | HB2 | GLU X 169 | -8.691  | 11.846 | -16.830 | 1.00 | 0.00 |
| ATOM | 2584 | CG  | GLU X 169 | -9.871  | 10.095 | -17.083 | 1.00 | 0.00 |
| ATOM | 2585 | HG1 | GLU X 169 | -9.220  | 9.391  | -16.522 | 1.00 | 0.00 |
| ATOM | 2586 | HG2 | GLU X 169 | -10.326 | 9.433  | -17.851 | 1.00 | 0.00 |
| ATOM | 2587 | CD  | GLU X 169 | -10.915 | 10.555 | -16.115 | 1.00 | 0.00 |
| ATOM | 2588 | OE1 | GLU X 169 | -11.460 | 9.717  | -15.395 | 1.00 | 0.00 |
| ATOM | 2589 | OE2 | GLU X 169 | -11.204 | 11.795 | -15.958 | 1.00 | 0.00 |
| ATOM | 2590 | C   | GLU X 169 | -7.751  | 11.906 | -19.808 | 1.00 | 0.00 |
| ATOM | 2591 | O   | GLU X 169 | -8.644  | 12.701 | -20.085 | 1.00 | 0.00 |
| ATOM | 2592 | N   | ALA X 170 | -6.596  | 11.852 | -20.569 | 1.00 | 0.00 |
| ATOM | 2593 | HN  | ALA X 170 | -5.881  | 11.165 | -20.464 | 1.00 | 0.00 |
| ATOM | 2594 | CA  | ALA X 170 | -6.295  | 12.845 | -21.570 | 1.00 | 0.00 |
| ATOM | 2595 | HA  | ALA X 170 | -5.275  | 12.632 | -21.852 | 1.00 | 0.00 |
| ATOM | 2596 | CB  | ALA X 170 | -7.069  | 12.624 | -22.859 | 1.00 | 0.00 |
| ATOM | 2597 | HB1 | ALA X 170 | -6.864  | 11.574 | -23.156 | 1.00 | 0.00 |
| ATOM | 2598 | HB2 | ALA X 170 | -6.704  | 13.115 | -23.786 | 1.00 | 0.00 |
| ATOM | 2599 | HB3 | ALA X 170 | -8.169  | 12.637 | -22.697 | 1.00 | 0.00 |
| ATOM | 2600 | C   | ALA X 170 | -6.381  | 14.337 | -21.269 | 1.00 | 0.00 |





|           |      |      |           |        |        |         |      |      |
|-----------|------|------|-----------|--------|--------|---------|------|------|
| ATOM<br>C | 2626 | CA   | LEU X 173 | -2.398 | 16.123 | -14.421 | 1.00 | 0.00 |
| ATOM<br>H | 2627 | HA   | LEU X 173 | -1.839 | 15.557 | -15.152 | 1.00 | 0.00 |
| ATOM<br>C | 2628 | CB   | LEU X 173 | -1.907 | 17.647 | -14.156 | 1.00 | 0.00 |
| ATOM<br>H | 2629 | HB1  | LEU X 173 | -2.510 | 18.042 | -13.311 | 1.00 | 0.00 |
| ATOM<br>H | 2630 | HB2  | LEU X 173 | -1.938 | 18.211 | -15.112 | 1.00 | 0.00 |
| ATOM<br>C | 2631 | CG   | LEU X 173 | -0.446 | 17.856 | -13.737 | 1.00 | 0.00 |
| ATOM<br>H | 2632 | HG   | LEU X 173 | -0.345 | 17.355 | -12.751 | 1.00 | 0.00 |
| ATOM<br>C | 2633 | CD1  | LEU X 173 | 0.637  | 17.270 | -14.687 | 1.00 | 0.00 |
| ATOM<br>H | 2634 | HD11 | LEU X 173 | 0.335  | 17.360 | -15.752 | 1.00 | 0.00 |
| ATOM<br>H | 2635 | HD12 | LEU X 173 | 0.659  | 16.177 | -14.488 | 1.00 | 0.00 |
| ATOM<br>H | 2636 | HD13 | LEU X 173 | 1.620  | 17.788 | -14.663 | 1.00 | 0.00 |
| ATOM<br>C | 2637 | CD2  | LEU X 173 | -0.039 | 19.374 | -13.526 | 1.00 | 0.00 |
| ATOM<br>H | 2638 | HD21 | LEU X 173 | -0.369 | 19.582 | -12.485 | 1.00 | 0.00 |
| ATOM<br>H | 2639 | HD22 | LEU X 173 | -0.435 | 20.016 | -14.341 | 1.00 | 0.00 |
| ATOM<br>H | 2640 | HD23 | LEU X 173 | 1.070  | 19.434 | -13.513 | 1.00 | 0.00 |
| ATOM<br>C | 2641 | C    | LEU X 173 | -2.189 | 15.280 | -13.107 | 1.00 | 0.00 |
| ATOM<br>O | 2642 | O    | LEU X 173 | -2.813 | 15.589 | -12.058 | 1.00 | 0.00 |
| ATOM<br>N | 2643 | N    | GLU X 174 | -1.267 | 14.253 | -13.115 | 1.00 | 0.00 |
| ATOM<br>H | 2644 | HN   | GLU X 174 | -0.932 | 13.940 | -14.000 | 1.00 | 0.00 |
| ATOM<br>C | 2645 | CA   | GLU X 174 | -0.853 | 13.474 | -12.001 | 1.00 | 0.00 |
| ATOM<br>H | 2646 | HA   | GLU X 174 | -1.818 | 13.275 | -11.557 | 1.00 | 0.00 |
| ATOM<br>C | 2647 | CB   | GLU X 174 | -0.100 | 12.169 | -12.431 | 1.00 | 0.00 |
| ATOM<br>H | 2648 | HB1  | GLU X 174 | 0.265  | 11.657 | -11.515 | 1.00 | 0.00 |
| ATOM<br>H | 2649 | HB2  | GLU X 174 | 0.802  | 12.467 | -13.007 | 1.00 | 0.00 |
| ATOM<br>C | 2650 | CG   | GLU X 174 | -1.013 | 11.053 | -13.019 | 1.00 | 0.00 |



|           |      |      |           |       |        |         |      |      |
|-----------|------|------|-----------|-------|--------|---------|------|------|
| ATOM<br>N | 2676 | N    | VAL X 177 | 4.027 | 16.190 | -10.326 | 1.00 | 0.00 |
| ATOM<br>H | 2677 | HN   | VAL X 177 | 3.038 | 16.248 | -10.212 | 1.00 | 0.00 |
| ATOM<br>C | 2678 | CA   | VAL X 177 | 4.334 | 16.625 | -11.659 | 1.00 | 0.00 |
| ATOM<br>H | 2679 | HA   | VAL X 177 | 5.330 | 16.246 | -11.831 | 1.00 | 0.00 |
| ATOM<br>C | 2680 | CB   | VAL X 177 | 3.478 | 16.053 | -12.818 | 1.00 | 0.00 |
| ATOM<br>H | 2681 | HB   | VAL X 177 | 2.413 | 16.340 | -12.689 | 1.00 | 0.00 |
| ATOM<br>C | 2682 | CG1  | VAL X 177 | 4.050 | 16.487 | -14.216 | 1.00 | 0.00 |
| ATOM<br>H | 2683 | HG11 | VAL X 177 | 4.085 | 17.596 | -14.274 | 1.00 | 0.00 |
| ATOM<br>H | 2684 | HG12 | VAL X 177 | 3.454 | 16.116 | -15.077 | 1.00 | 0.00 |
| ATOM<br>H | 2685 | HG13 | VAL X 177 | 5.123 | 16.220 | -14.322 | 1.00 | 0.00 |
| ATOM<br>C | 2686 | CG2  | VAL X 177 | 3.584 | 14.505 | -12.679 | 1.00 | 0.00 |
| ATOM<br>H | 2687 | HG21 | VAL X 177 | 3.150 | 14.241 | -11.691 | 1.00 | 0.00 |
| ATOM<br>H | 2688 | HG22 | VAL X 177 | 4.668 | 14.272 | -12.751 | 1.00 | 0.00 |
| ATOM<br>H | 2689 | HG23 | VAL X 177 | 3.108 | 13.974 | -13.531 | 1.00 | 0.00 |
| ATOM<br>C | 2690 | C    | VAL X 177 | 4.207 | 18.123 | -11.560 | 1.00 | 0.00 |
| ATOM<br>O | 2691 | O    | VAL X 177 | 3.184 | 18.572 | -10.977 | 1.00 | 0.00 |
| ATOM<br>N | 2692 | N    | PRO X 178 | 5.121 | 18.971 | -12.065 | 1.00 | 0.00 |
| ATOM<br>C | 2693 | CD   | PRO X 178 | 6.417 | 18.511 | -12.492 | 1.00 | 0.00 |
| ATOM<br>H | 2694 | HD1  | PRO X 178 | 6.363 | 18.278 | -13.577 | 1.00 | 0.00 |
| ATOM<br>H | 2695 | HD2  | PRO X 178 | 6.768 | 17.627 | -11.917 | 1.00 | 0.00 |
| ATOM<br>C | 2696 | CA   | PRO X 178 | 4.934 | 20.390 | -12.189 | 1.00 | 0.00 |
| ATOM<br>H | 2697 | HA   | PRO X 178 | 4.739 | 20.848 | -11.231 | 1.00 | 0.00 |
| ATOM<br>C | 2698 | CB   | PRO X 178 | 6.303 | 20.858 | -12.887 | 1.00 | 0.00 |
| ATOM<br>H | 2699 | HB1  | PRO X 178 | 6.579 | 21.890 | -12.581 | 1.00 | 0.00 |
| ATOM<br>H | 2700 | HB2  | PRO X 178 | 6.250 | 20.801 | -13.995 | 1.00 | 0.00 |

|           |      |     |           |       |        |         |      |      |
|-----------|------|-----|-----------|-------|--------|---------|------|------|
| ATOM<br>C | 2701 | CG  | PRO X 178 | 7.243 | 19.791 | -12.419 | 1.00 | 0.00 |
| ATOM<br>H | 2702 | HG1 | PRO X 178 | 8.171 | 19.562 | -12.985 | 1.00 | 0.00 |
| ATOM<br>H | 2703 | HG2 | PRO X 178 | 7.509 | 19.939 | -11.351 | 1.00 | 0.00 |
| ATOM<br>C | 2704 | C   | PRO X 178 | 3.761 | 20.853 | -13.082 | 1.00 | 0.00 |
| ATOM<br>O | 2705 | O   | PRO X 178 | 3.465 | 20.263 | -14.093 | 1.00 | 0.00 |
| ATOM<br>N | 2706 | N   | SER X 179 | 3.175 | 21.985 | -12.749 | 1.00 | 0.00 |
| ATOM<br>H | 2707 | HN  | SER X 179 | 3.612 | 22.340 | -11.926 | 1.00 | 0.00 |
| ATOM<br>C | 2708 | CA  | SER X 179 | 2.015 | 22.646 | -13.326 | 1.00 | 0.00 |
| ATOM<br>H | 2709 | HA  | SER X 179 | 1.262 | 21.874 | -13.380 | 1.00 | 0.00 |
| ATOM<br>C | 2710 | CB  | SER X 179 | 1.465 | 23.845 | -12.471 | 1.00 | 0.00 |
| ATOM<br>H | 2711 | HB1 | SER X 179 | 1.268 | 23.250 | -11.553 | 1.00 | 0.00 |
| ATOM<br>H | 2712 | HB2 | SER X 179 | 0.498 | 24.284 | -12.796 | 1.00 | 0.00 |
| ATOM<br>O | 2713 | OG  | SER X 179 | 2.375 | 24.876 | -12.040 | 1.00 | 0.00 |
| ATOM<br>H | 2714 | HG1 | SER X 179 | 2.739 | 24.634 | -11.186 | 1.00 | 0.00 |
| ATOM<br>C | 2715 | C   | SER X 179 | 2.119 | 23.202 | -14.703 | 1.00 | 0.00 |
| ATOM<br>O | 2716 | O   | SER X 179 | 1.059 | 23.279 | -15.303 | 1.00 | 0.00 |
| ATOM<br>N | 2717 | N   | ARG X 180 | 3.316 | 23.463 | -15.201 | 1.00 | 0.00 |
| ATOM<br>H | 2718 | HN  | ARG X 180 | 4.020 | 23.495 | -14.496 | 1.00 | 0.00 |
| ATOM<br>C | 2719 | CA  | ARG X 180 | 3.533 | 23.744 | -16.579 | 1.00 | 0.00 |
| ATOM<br>H | 2720 | HA  | ARG X 180 | 2.930 | 24.594 | -16.862 | 1.00 | 0.00 |
| ATOM<br>C | 2721 | CB  | ARG X 180 | 5.012 | 24.129 | -16.896 | 1.00 | 0.00 |
| ATOM<br>H | 2722 | HB1 | ARG X 180 | 5.146 | 25.087 | -16.349 | 1.00 | 0.00 |
| ATOM<br>H | 2723 | HB2 | ARG X 180 | 5.177 | 24.390 | -17.963 | 1.00 | 0.00 |
| ATOM<br>C | 2724 | CG  | ARG X 180 | 6.046 | 23.031 | -16.489 | 1.00 | 0.00 |
| ATOM<br>H | 2725 | HG1 | ARG X 180 | 5.990 | 22.047 | -17.001 | 1.00 | 0.00 |





|           |      |     |           |         |        |         |      |      |
|-----------|------|-----|-----------|---------|--------|---------|------|------|
| ATOM<br>H | 2776 | HA2 | GLY X 183 | -2.266  | 18.106 | -22.655 | 1.00 | 0.00 |
| ATOM<br>C | 2777 | C   | GLY X 183 | -4.295  | 18.134 | -22.172 | 1.00 | 0.00 |
| ATOM<br>O | 2778 | O   | GLY X 183 | -5.045  | 18.678 | -21.360 | 1.00 | 0.00 |
| ATOM<br>N | 2779 | N   | SER X 184 | -4.643  | 17.744 | -23.426 | 1.00 | 0.00 |
| ATOM<br>H | 2780 | HN  | SER X 184 | -3.929  | 17.317 | -23.976 | 1.00 | 0.00 |
| ATOM<br>C | 2781 | CA  | SER X 184 | -5.916  | 18.061 | -24.066 | 1.00 | 0.00 |
| ATOM<br>H | 2782 | HA  | SER X 184 | -6.693  | 17.975 | -23.321 | 1.00 | 0.00 |
| ATOM<br>C | 2783 | CB  | SER X 184 | -5.985  | 19.615 | -24.589 | 1.00 | 0.00 |
| ATOM<br>H | 2784 | HB1 | SER X 184 | -5.418  | 19.782 | -25.530 | 1.00 | 0.00 |
| ATOM<br>H | 2785 | HB2 | SER X 184 | -5.450  | 20.228 | -23.831 | 1.00 | 0.00 |
| ATOM<br>O | 2786 | OG  | SER X 184 | -7.354  | 19.969 | -24.808 | 1.00 | 0.00 |
| ATOM<br>H | 2787 | HG1 | SER X 184 | -7.367  | 20.560 | -25.564 | 1.00 | 0.00 |
| ATOM<br>C | 2788 | C   | SER X 184 | -6.355  | 17.136 | -25.187 | 1.00 | 0.00 |
| ATOM<br>O | 2789 | O   | SER X 184 | -5.512  | 16.485 | -25.735 | 1.00 | 0.00 |
| ATOM<br>N | 2790 | N   | GLY X 185 | -7.616  | 17.108 | -25.467 | 1.00 | 0.00 |
| ATOM<br>H | 2791 | HN  | GLY X 185 | -8.253  | 17.646 | -24.921 | 1.00 | 0.00 |
| ATOM<br>C | 2792 | CA  | GLY X 185 | -8.172  | 16.513 | -26.674 | 1.00 | 0.00 |
| ATOM<br>H | 2793 | HA1 | GLY X 185 | -7.415  | 16.348 | -27.426 | 1.00 | 0.00 |
| ATOM<br>H | 2794 | HA2 | GLY X 185 | -8.923  | 17.218 | -26.998 | 1.00 | 0.00 |
| ATOM<br>C | 2795 | C   | GLY X 185 | -8.978  | 15.275 | -26.473 | 1.00 | 0.00 |
| ATOM<br>O | 2796 | O   | GLY X 185 | -8.807  | 14.487 | -25.508 | 1.00 | 0.00 |
| ATOM<br>N | 2797 | N   | SER X 186 | -9.971  | 14.975 | -27.375 | 1.00 | 0.00 |
| ATOM<br>H | 2798 | HN  | SER X 186 | -9.986  | 15.658 | -28.101 | 1.00 | 0.00 |
| ATOM<br>C | 2799 | CA  | SER X 186 | -10.742 | 13.800 | -27.367 | 1.00 | 0.00 |
| ATOM<br>H | 2800 | HA  | SER X 186 | -10.340 | 12.966 | -26.812 | 1.00 | 0.00 |









|           |      |      |           |        |        |         |      |      |
|-----------|------|------|-----------|--------|--------|---------|------|------|
| ATOM<br>C | 2876 | C    | THR X 191 | -1.558 | 16.880 | -25.983 | 1.00 | 0.00 |
| ATOM<br>O | 2877 | O    | THR X 191 | -2.313 | 16.772 | -25.023 | 1.00 | 0.00 |
| ATOM<br>N | 2878 | N    | LEU X 192 | -0.241 | 16.801 | -25.920 | 1.00 | 0.00 |
| ATOM<br>H | 2879 | HN   | LEU X 192 | 0.341  | 16.715 | -26.725 | 1.00 | 0.00 |
| ATOM<br>C | 2880 | CA   | LEU X 192 | 0.427  | 17.077 | -24.616 | 1.00 | 0.00 |
| ATOM<br>H | 2881 | HA   | LEU X 192 | -0.331 | 17.142 | -23.849 | 1.00 | 0.00 |
| ATOM<br>C | 2882 | CB   | LEU X 192 | 1.445  | 15.947 | -24.291 | 1.00 | 0.00 |
| ATOM<br>H | 2883 | HB1  | LEU X 192 | 1.980  | 15.608 | -25.204 | 1.00 | 0.00 |
| ATOM<br>H | 2884 | HB2  | LEU X 192 | 0.898  | 14.996 | -24.122 | 1.00 | 0.00 |
| ATOM<br>C | 2885 | CG   | LEU X 192 | 2.560  | 16.110 | -23.170 | 1.00 | 0.00 |
| ATOM<br>H | 2886 | HG   | LEU X 192 | 3.230  | 16.955 | -23.437 | 1.00 | 0.00 |
| ATOM<br>C | 2887 | CD1  | LEU X 192 | 2.015  | 16.116 | -21.748 | 1.00 | 0.00 |
| ATOM<br>H | 2888 | HD11 | LEU X 192 | 1.453  | 17.047 | -21.521 | 1.00 | 0.00 |
| ATOM<br>H | 2889 | HD12 | LEU X 192 | 2.754  | 16.042 | -20.922 | 1.00 | 0.00 |
| ATOM<br>H | 2890 | HD13 | LEU X 192 | 1.244  | 15.330 | -21.599 | 1.00 | 0.00 |
| ATOM<br>C | 2891 | CD2  | LEU X 192 | 3.439  | 14.836 | -23.197 | 1.00 | 0.00 |
| ATOM<br>H | 2892 | HD21 | LEU X 192 | 3.003  | 13.963 | -22.666 | 1.00 | 0.00 |
| ATOM<br>H | 2893 | HD22 | LEU X 192 | 4.325  | 14.934 | -22.534 | 1.00 | 0.00 |
| ATOM<br>H | 2894 | HD23 | LEU X 192 | 3.804  | 14.591 | -24.217 | 1.00 | 0.00 |
| ATOM<br>C | 2895 | C    | LEU X 192 | 1.194  | 18.416 | -24.728 | 1.00 | 0.00 |
| ATOM<br>O | 2896 | O    | LEU X 192 | 1.758  | 18.769 | -25.773 | 1.00 | 0.00 |
| ATOM<br>N | 2897 | N    | THR X 193 | 1.226  | 19.185 | -23.627 | 1.00 | 0.00 |
| ATOM<br>H | 2898 | HN   | THR X 193 | 0.597  | 19.047 | -22.865 | 1.00 | 0.00 |
| ATOM<br>C | 2899 | CA   | THR X 193 | 1.823  | 20.540 | -23.730 | 1.00 | 0.00 |
| ATOM<br>H | 2900 | HA   | THR X 193 | 2.481  | 20.689 | -24.574 | 1.00 | 0.00 |

|           |      |      |           |       |        |         |      |      |
|-----------|------|------|-----------|-------|--------|---------|------|------|
| ATOM<br>C | 2901 | CB   | THR X 193 | 0.811 | 21.668 | -23.596 | 1.00 | 0.00 |
| ATOM<br>H | 2902 | HB   | THR X 193 | 0.005 | 21.408 | -22.877 | 1.00 | 0.00 |
| ATOM<br>O | 2903 | OG1  | THR X 193 | 0.109 | 21.722 | -24.814 | 1.00 | 0.00 |
| ATOM<br>H | 2904 | HG1  | THR X 193 | 0.793 | 22.011 | -25.422 | 1.00 | 0.00 |
| ATOM<br>C | 2905 | CG2  | THR X 193 | 1.423 | 23.049 | -23.286 | 1.00 | 0.00 |
| ATOM<br>H | 2906 | HG21 | THR X 193 | 0.539 | 23.721 | -23.312 | 1.00 | 0.00 |
| ATOM<br>H | 2907 | HG22 | THR X 193 | 2.169 | 23.384 | -24.038 | 1.00 | 0.00 |
| ATOM<br>H | 2908 | HG23 | THR X 193 | 1.868 | 23.098 | -22.269 | 1.00 | 0.00 |
| ATOM<br>C | 2909 | C    | THR X 193 | 2.787 | 20.707 | -22.623 | 1.00 | 0.00 |
| ATOM<br>O | 2910 | O    | THR X 193 | 2.507 | 20.605 | -21.409 | 1.00 | 0.00 |
| ATOM<br>N | 2911 | N    | ILE X 194 | 4.066 | 21.051 | -22.968 | 1.00 | 0.00 |
| ATOM<br>H | 2912 | HN   | ILE X 194 | 4.440 | 21.035 | -23.892 | 1.00 | 0.00 |
| ATOM<br>C | 2913 | CA   | ILE X 194 | 5.027 | 21.495 | -21.901 | 1.00 | 0.00 |
| ATOM<br>H | 2914 | HA   | ILE X 194 | 4.736 | 21.267 | -20.886 | 1.00 | 0.00 |
| ATOM<br>C | 2915 | CB   | ILE X 194 | 6.495 | 20.926 | -22.120 | 1.00 | 0.00 |
| ATOM<br>H | 2916 | HB   | ILE X 194 | 6.935 | 21.427 | -23.008 | 1.00 | 0.00 |
| ATOM<br>C | 2917 | CG2  | ILE X 194 | 7.300 | 21.330 | -20.823 | 1.00 | 0.00 |
| ATOM<br>H | 2918 | HG21 | ILE X 194 | 8.386 | 21.100 | -20.874 | 1.00 | 0.00 |
| ATOM<br>H | 2919 | HG22 | ILE X 194 | 6.911 | 20.850 | -19.900 | 1.00 | 0.00 |
| ATOM<br>H | 2920 | HG23 | ILE X 194 | 7.333 | 22.440 | -20.793 | 1.00 | 0.00 |
| ATOM<br>C | 2921 | CG1  | ILE X 194 | 6.562 | 19.420 | -22.346 | 1.00 | 0.00 |
| ATOM<br>H | 2922 | HG11 | ILE X 194 | 5.940 | 19.131 | -23.220 | 1.00 | 0.00 |
| ATOM<br>H | 2923 | HG12 | ILE X 194 | 6.215 | 18.930 | -21.411 | 1.00 | 0.00 |
| ATOM<br>C | 2924 | CD   | ILE X 194 | 7.961 | 18.831 | -22.566 | 1.00 | 0.00 |
| ATOM<br>H | 2925 | HD1  | ILE X 194 | 8.472 | 18.837 | -21.580 | 1.00 | 0.00 |

|           |      |     |     |   |     |        |        |         |      |      |
|-----------|------|-----|-----|---|-----|--------|--------|---------|------|------|
| ATOM<br>H | 2926 | HD2 | ILE | X | 194 | 8.610  | 19.242 | -23.368 | 1.00 | 0.00 |
| ATOM<br>H | 2927 | HD3 | ILE | X | 194 | 7.883  | 17.764 | -22.868 | 1.00 | 0.00 |
| ATOM<br>C | 2928 | C   | ILE | X | 194 | 5.136  | 22.983 | -21.971 | 1.00 | 0.00 |
| ATOM<br>O | 2929 | O   | ILE | X | 194 | 5.715  | 23.628 | -22.911 | 1.00 | 0.00 |
| ATOM<br>N | 2930 | N   | SER | X | 195 | 4.622  | 23.782 | -21.006 | 1.00 | 0.00 |
| ATOM<br>H | 2931 | HN  | SER | X | 195 | 4.244  | 23.491 | -20.131 | 1.00 | 0.00 |
| ATOM<br>C | 2932 | CA  | SER | X | 195 | 4.778  | 25.240 | -20.927 | 1.00 | 0.00 |
| ATOM<br>H | 2933 | HA  | SER | X | 195 | 4.746  | 25.548 | -21.962 | 1.00 | 0.00 |
| ATOM<br>C | 2934 | CB  | SER | X | 195 | 3.688  | 26.073 | -20.145 | 1.00 | 0.00 |
| ATOM<br>H | 2935 | HB1 | SER | X | 195 | 4.091  | 27.100 | -20.018 | 1.00 | 0.00 |
| ATOM<br>H | 2936 | HB2 | SER | X | 195 | 3.556  | 25.621 | -19.139 | 1.00 | 0.00 |
| ATOM<br>O | 2937 | OG  | SER | X | 195 | 2.430  | 26.046 | -20.761 | 1.00 | 0.00 |
| ATOM<br>H | 2938 | HG1 | SER | X | 195 | 2.472  | 26.562 | -21.569 | 1.00 | 0.00 |
| ATOM<br>C | 2939 | C   | SER | X | 195 | 6.201  | 25.712 | -20.463 | 1.00 | 0.00 |
| ATOM<br>O | 2940 | O   | SER | X | 195 | 6.376  | 26.096 | -19.295 | 1.00 | 0.00 |
| ATOM<br>N | 2941 | N   | SER | X | 196 | 7.142  | 25.802 | -21.436 | 1.00 | 0.00 |
| ATOM<br>H | 2942 | HN  | SER | X | 196 | 6.860  | 25.287 | -22.242 | 1.00 | 0.00 |
| ATOM<br>C | 2943 | CA  | SER | X | 196 | 8.394  | 26.392 | -21.226 | 1.00 | 0.00 |
| ATOM<br>H | 2944 | HA  | SER | X | 196 | 8.863  | 26.476 | -22.195 | 1.00 | 0.00 |
| ATOM<br>C | 2945 | CB  | SER | X | 196 | 8.461  | 27.851 | -20.566 | 1.00 | 0.00 |
| ATOM<br>H | 2946 | HB1 | SER | X | 196 | 8.101  | 27.973 | -19.522 | 1.00 | 0.00 |
| ATOM<br>H | 2947 | HB2 | SER | X | 196 | 7.651  | 28.401 | -21.092 | 1.00 | 0.00 |
| ATOM<br>O | 2948 | OG  | SER | X | 196 | 9.779  | 28.517 | -20.695 | 1.00 | 0.00 |
| ATOM<br>H | 2949 | HG1 | SER | X | 196 | 10.413 | 28.057 | -20.140 | 1.00 | 0.00 |
| ATOM<br>C | 2950 | C   | SER | X | 196 | 9.444  | 25.472 | -20.507 | 1.00 | 0.00 |

|           |      |      |           |        |        |         |      |      |
|-----------|------|------|-----------|--------|--------|---------|------|------|
| ATOM<br>O | 2951 | O    | SER X 196 | 9.434  | 25.308 | -19.309 | 1.00 | 0.00 |
| ATOM<br>N | 2952 | N    | LEU X 197 | 10.225 | 24.796 | -21.289 | 1.00 | 0.00 |
| ATOM<br>H | 2953 | HN   | LEU X 197 | 10.410 | 25.048 | -22.235 | 1.00 | 0.00 |
| ATOM<br>C | 2954 | CA   | LEU X 197 | 11.230 | 23.773 | -20.805 | 1.00 | 0.00 |
| ATOM<br>H | 2955 | HA   | LEU X 197 | 10.698 | 22.872 | -20.538 | 1.00 | 0.00 |
| ATOM<br>C | 2956 | CB   | LEU X 197 | 12.088 | 23.100 | -21.935 | 1.00 | 0.00 |
| ATOM<br>H | 2957 | HB1  | LEU X 197 | 12.575 | 22.171 | -21.569 | 1.00 | 0.00 |
| ATOM<br>H | 2958 | HB2  | LEU X 197 | 12.943 | 23.757 | -22.201 | 1.00 | 0.00 |
| ATOM<br>C | 2959 | CG   | LEU X 197 | 11.479 | 22.639 | -23.282 | 1.00 | 0.00 |
| ATOM<br>H | 2960 | HG   | LEU X 197 | 11.185 | 23.598 | -23.758 | 1.00 | 0.00 |
| ATOM<br>C | 2961 | CD1  | LEU X 197 | 12.451 | 21.849 | -24.124 | 1.00 | 0.00 |
| ATOM<br>H | 2962 | HD11 | LEU X 197 | 12.736 | 20.876 | -23.669 | 1.00 | 0.00 |
| ATOM<br>H | 2963 | HD12 | LEU X 197 | 13.460 | 22.313 | -24.164 | 1.00 | 0.00 |
| ATOM<br>H | 2964 | HD13 | LEU X 197 | 12.077 | 21.455 | -25.093 | 1.00 | 0.00 |
| ATOM<br>C | 2965 | CD2  | LEU X 197 | 10.172 | 21.810 | -23.152 | 1.00 | 0.00 |
| ATOM<br>H | 2966 | HD21 | LEU X 197 | 9.277  | 22.414 | -22.888 | 1.00 | 0.00 |
| ATOM<br>H | 2967 | HD22 | LEU X 197 | 10.253 | 21.013 | -22.382 | 1.00 | 0.00 |
| ATOM<br>H | 2968 | HD23 | LEU X 197 | 9.714  | 21.509 | -24.118 | 1.00 | 0.00 |
| ATOM<br>C | 2969 | C    | LEU X 197 | 12.194 | 24.134 | -19.703 | 1.00 | 0.00 |
| ATOM<br>O | 2970 | O    | LEU X 197 | 12.619 | 25.248 | -19.634 | 1.00 | 0.00 |
| ATOM<br>N | 2971 | N    | GLN X 198 | 12.540 | 23.175 | -18.870 | 1.00 | 0.00 |
| ATOM<br>H | 2972 | HN   | GLN X 198 | 11.975 | 22.353 | -18.888 | 1.00 | 0.00 |
| ATOM<br>C | 2973 | CA   | GLN X 198 | 13.654 | 23.361 | -17.960 | 1.00 | 0.00 |
| ATOM<br>H | 2974 | HA   | GLN X 198 | 14.096 | 24.332 | -18.127 | 1.00 | 0.00 |
| ATOM<br>C | 2975 | CB   | GLN X 198 | 13.102 | 23.047 | -16.547 | 1.00 | 0.00 |

|           |      |      |     |   |     |        |        |         |      |      |
|-----------|------|------|-----|---|-----|--------|--------|---------|------|------|
| ATOM<br>H | 2976 | HB1  | GLN | X | 198 | 13.965 | 22.955 | -15.854 | 1.00 | 0.00 |
| ATOM<br>H | 2977 | HB2  | GLN | X | 198 | 12.543 | 22.089 | -16.606 | 1.00 | 0.00 |
| ATOM<br>C | 2978 | CG   | GLN | X | 198 | 12.201 | 24.220 | -16.011 | 1.00 | 0.00 |
| ATOM<br>H | 2979 | HG1  | GLN | X | 198 | 11.840 | 23.894 | -15.012 | 1.00 | 0.00 |
| ATOM<br>H | 2980 | HG2  | GLN | X | 198 | 11.355 | 24.282 | -16.728 | 1.00 | 0.00 |
| ATOM<br>C | 2981 | CD   | GLN | X | 198 | 12.892 | 25.595 | -15.758 | 1.00 | 0.00 |
| ATOM<br>O | 2982 | OE1  | GLN | X | 198 | 14.136 | 25.728 | -15.911 | 1.00 | 0.00 |
| ATOM<br>N | 2983 | NE2  | GLN | X | 198 | 12.063 | 26.559 | -15.515 | 1.00 | 0.00 |
| ATOM<br>H | 2984 | HE21 | GLN | X | 198 | 12.412 | 27.488 | -15.390 | 1.00 | 0.00 |
| ATOM<br>H | 2985 | HE22 | GLN | X | 198 | 11.069 | 26.451 | -15.504 | 1.00 | 0.00 |
| ATOM<br>C | 2986 | C    | GLN | X | 198 | 14.736 | 22.349 | -18.309 | 1.00 | 0.00 |
| ATOM<br>O | 2987 | O    | GLN | X | 198 | 14.462 | 21.473 | -19.133 | 1.00 | 0.00 |
| ATOM<br>N | 2988 | N    | PRO | X | 199 | 15.984 | 22.571 | -17.934 | 1.00 | 0.00 |
| ATOM<br>C | 2989 | CD   | PRO | X | 199 | 16.463 | 23.699 | -17.140 | 1.00 | 0.00 |
| ATOM<br>H | 2990 | HD1  | PRO | X | 199 | 15.964 | 23.701 | -16.147 | 1.00 | 0.00 |
| ATOM<br>H | 2991 | HD2  | PRO | X | 199 | 16.157 | 24.706 | -17.497 | 1.00 | 0.00 |
| ATOM<br>C | 2992 | CA   | PRO | X | 199 | 17.093 | 21.804 | -18.528 | 1.00 | 0.00 |
| ATOM<br>H | 2993 | HA   | PRO | X | 199 | 17.022 | 21.907 | -19.601 | 1.00 | 0.00 |
| ATOM<br>C | 2994 | CB   | PRO | X | 199 | 18.383 | 22.426 | -18.087 | 1.00 | 0.00 |
| ATOM<br>H | 2995 | HB1  | PRO | X | 199 | 18.712 | 23.025 | -18.963 | 1.00 | 0.00 |
| ATOM<br>H | 2996 | HB2  | PRO | X | 199 | 19.252 | 21.769 | -17.864 | 1.00 | 0.00 |
| ATOM<br>C | 2997 | CG   | PRO | X | 199 | 17.915 | 23.507 | -16.957 | 1.00 | 0.00 |
| ATOM<br>H | 2998 | HG1  | PRO | X | 199 | 18.285 | 23.110 | -15.988 | 1.00 | 0.00 |
| ATOM<br>H | 2999 | HG2  | PRO | X | 199 | 18.415 | 24.493 | -17.064 | 1.00 | 0.00 |
| ATOM<br>C | 3000 | C    | PRO | X | 199 | 17.033 | 20.294 | -18.344 | 1.00 | 0.00 |



|           |      |     |           |        |        |         |      |      |
|-----------|------|-----|-----------|--------|--------|---------|------|------|
| ATOM<br>O | 3001 | O   | PRO X 199 | 17.804 | 19.605 | -19.042 | 1.00 | 0.00 |
| ATOM<br>N | 3002 | N   | ASP X 200 | 16.266 | 19.804 | -17.342 | 1.00 | 0.00 |
| ATOM<br>H | 3003 | HN  | ASP X 200 | 15.745 | 20.486 | -16.835 | 1.00 | 0.00 |
| ATOM<br>C | 3004 | CA  | ASP X 200 | 16.018 | 18.341 | -17.048 | 1.00 | 0.00 |
| ATOM<br>H | 3005 | HA  | ASP X 200 | 16.819 | 17.815 | -17.545 | 1.00 | 0.00 |
| ATOM<br>C | 3006 | CB  | ASP X 200 | 15.984 | 18.304 | -15.509 | 1.00 | 0.00 |
| ATOM<br>H | 3007 | HB1 | ASP X 200 | 15.068 | 18.834 | -15.170 | 1.00 | 0.00 |
| ATOM<br>H | 3008 | HB2 | ASP X 200 | 16.881 | 18.863 | -15.167 | 1.00 | 0.00 |
| ATOM<br>C | 3009 | CG  | ASP X 200 | 15.982 | 16.863 | -14.984 | 1.00 | 0.00 |
| ATOM<br>O | 3010 | OD1 | ASP X 200 | 16.465 | 15.967 | -15.735 | 1.00 | 0.00 |
| ATOM<br>O | 3011 | OD2 | ASP X 200 | 15.616 | 16.652 | -13.836 | 1.00 | 0.00 |
| ATOM<br>C | 3012 | C   | ASP X 200 | 14.689 | 17.850 | -17.612 | 1.00 | 0.00 |
| ATOM<br>O | 3013 | O   | ASP X 200 | 14.226 | 16.740 | -17.395 | 1.00 | 0.00 |
| ATOM<br>N | 3014 | N   | ASP X 201 | 13.967 | 18.657 | -18.441 | 1.00 | 0.00 |
| ATOM<br>H | 3015 | HN  | ASP X 201 | 14.352 | 19.536 | -18.710 | 1.00 | 0.00 |
| ATOM<br>C | 3016 | CA  | ASP X 201 | 12.753 | 18.268 | -19.205 | 1.00 | 0.00 |
| ATOM<br>H | 3017 | HA  | ASP X 201 | 12.132 | 17.662 | -18.561 | 1.00 | 0.00 |
| ATOM<br>C | 3018 | CB  | ASP X 201 | 11.807 | 19.399 | -19.600 | 1.00 | 0.00 |
| ATOM<br>H | 3019 | HB1 | ASP X 201 | 10.926 | 19.036 | -20.172 | 1.00 | 0.00 |
| ATOM<br>H | 3020 | HB2 | ASP X 201 | 12.345 | 20.215 | -20.128 | 1.00 | 0.00 |
| ATOM<br>C | 3021 | CG  | ASP X 201 | 11.159 | 19.969 | -18.329 | 1.00 | 0.00 |
| ATOM<br>O | 3022 | OD1 | ASP X 201 | 11.148 | 19.334 | -17.216 | 1.00 | 0.00 |
| ATOM<br>O | 3023 | OD2 | ASP X 201 | 10.696 | 21.157 | -18.420 | 1.00 | 0.00 |
| ATOM<br>C | 3024 | C   | ASP X 201 | 13.014 | 17.465 | -20.410 | 1.00 | 0.00 |
| ATOM<br>O | 3025 | O   | ASP X 201 | 12.079 | 16.850 | -20.856 | 1.00 | 0.00 |

|           |      |     |           |        |        |         |      |      |
|-----------|------|-----|-----------|--------|--------|---------|------|------|
| ATOM<br>N | 3026 | N   | PHE X 202 | 14.201 | 17.366 | -20.944 | 1.00 | 0.00 |
| ATOM<br>H | 3027 | HN  | PHE X 202 | 15.049 | 17.710 | -20.548 | 1.00 | 0.00 |
| ATOM<br>C | 3028 | CA  | PHE X 202 | 14.456 | 16.562 | -22.138 | 1.00 | 0.00 |
| ATOM<br>H | 3029 | HA  | PHE X 202 | 13.702 | 16.842 | -22.859 | 1.00 | 0.00 |
| ATOM<br>C | 3030 | CB  | PHE X 202 | 15.887 | 16.872 | -22.670 | 1.00 | 0.00 |
| ATOM<br>H | 3031 | HB1 | PHE X 202 | 15.964 | 16.304 | -23.621 | 1.00 | 0.00 |
| ATOM<br>H | 3032 | HB2 | PHE X 202 | 16.718 | 16.620 | -21.976 | 1.00 | 0.00 |
| ATOM<br>C | 3033 | CG  | PHE X 202 | 16.037 | 18.361 | -22.953 | 1.00 | 0.00 |
| ATOM<br>C | 3034 | CD1 | PHE X 202 | 17.110 | 19.164 | -22.423 | 1.00 | 0.00 |
| ATOM<br>H | 3035 | HD1 | PHE X 202 | 17.866 | 18.720 | -21.793 | 1.00 | 0.00 |
| ATOM<br>C | 3036 | CE1 | PHE X 202 | 17.132 | 20.472 | -22.711 | 1.00 | 0.00 |
| ATOM<br>H | 3037 | HE1 | PHE X 202 | 17.972 | 21.042 | -22.342 | 1.00 | 0.00 |
| ATOM<br>C | 3038 | CZ  | PHE X 202 | 16.288 | 21.058 | -23.612 | 1.00 | 0.00 |
| ATOM<br>H | 3039 | HZ  | PHE X 202 | 16.358 | 22.078 | -23.960 | 1.00 | 0.00 |
| ATOM<br>C | 3040 | CD2 | PHE X 202 | 15.151 | 18.940 | -23.873 | 1.00 | 0.00 |
| ATOM<br>H | 3041 | HD2 | PHE X 202 | 14.473 | 18.416 | -24.530 | 1.00 | 0.00 |
| ATOM<br>C | 3042 | CE2 | PHE X 202 | 15.325 | 20.287 | -24.168 | 1.00 | 0.00 |
| ATOM<br>H | 3043 | HE2 | PHE X 202 | 14.725 | 20.679 | -24.976 | 1.00 | 0.00 |
| ATOM<br>C | 3044 | C   | PHE X 202 | 14.363 | 15.085 | -21.926 | 1.00 | 0.00 |
| ATOM<br>O | 3045 | O   | PHE X 202 | 15.060 | 14.396 | -21.156 | 1.00 | 0.00 |
| ATOM<br>N | 3046 | N   | ALA X 203 | 13.466 | 14.546 | -22.703 | 1.00 | 0.00 |
| ATOM<br>H | 3047 | HN  | ALA X 203 | 12.969 | 15.191 | -23.278 | 1.00 | 0.00 |
| ATOM<br>C | 3048 | CA  | ALA X 203 | 12.972 | 13.181 | -22.616 | 1.00 | 0.00 |
| ATOM<br>H | 3049 | HA  | ALA X 203 | 13.759 | 12.518 | -22.289 | 1.00 | 0.00 |
| ATOM<br>C | 3050 | CB  | ALA X 203 | 11.844 | 13.040 | -21.491 | 1.00 | 0.00 |

|           |      |      |     |   |     |        |        |         |      |      |
|-----------|------|------|-----|---|-----|--------|--------|---------|------|------|
| ATOM<br>H | 3051 | HB1  | ALA | X | 203 | 12.292 | 13.317 | -20.513 | 1.00 | 0.00 |
| ATOM<br>H | 3052 | HB2  | ALA | X | 203 | 11.431 | 12.011 | -21.417 | 1.00 | 0.00 |
| ATOM<br>H | 3053 | HB3  | ALA | X | 203 | 11.046 | 13.759 | -21.774 | 1.00 | 0.00 |
| ATOM<br>C | 3054 | C    | ALA | X | 203 | 12.337 | 12.620 | -23.907 | 1.00 | 0.00 |
| ATOM<br>O | 3055 | O    | ALA | X | 203 | 12.153 | 13.270 | -24.935 | 1.00 | 0.00 |
| ATOM<br>N | 3056 | N    | THR | X | 204 | 11.945 | 11.357 | -23.820 | 1.00 | 0.00 |
| ATOM<br>H | 3057 | HN   | THR | X | 204 | 12.202 | 10.781 | -23.048 | 1.00 | 0.00 |
| ATOM<br>C | 3058 | CA   | THR | X | 204 | 10.993 | 10.780 | -24.813 | 1.00 | 0.00 |
| ATOM<br>H | 3059 | HA   | THR | X | 204 | 11.011 | 11.349 | -25.731 | 1.00 | 0.00 |
| ATOM<br>C | 3060 | CB   | THR | X | 204 | 11.414 | 9.446  | -25.369 | 1.00 | 0.00 |
| ATOM<br>H | 3061 | HB   | THR | X | 204 | 11.398 | 8.586  | -24.665 | 1.00 | 0.00 |
| ATOM<br>O | 3062 | OG1  | THR | X | 204 | 12.830 | 9.376  | -25.520 | 1.00 | 0.00 |
| ATOM<br>H | 3063 | HG1  | THR | X | 204 | 13.112 | 10.269 | -25.734 | 1.00 | 0.00 |
| ATOM<br>C | 3064 | CG2  | THR | X | 204 | 10.851 | 9.118  | -26.691 | 1.00 | 0.00 |
| ATOM<br>H | 3065 | HG21 | THR | X | 204 | 11.184 | 9.909  | -27.397 | 1.00 | 0.00 |
| ATOM<br>H | 3066 | HG22 | THR | X | 204 | 9.740  | 9.136  | -26.668 | 1.00 | 0.00 |
| ATOM<br>H | 3067 | HG23 | THR | X | 204 | 11.232 | 8.107  | -26.951 | 1.00 | 0.00 |
| ATOM<br>C | 3068 | C    | THR | X | 204 | 9.591  | 10.567 | -24.277 | 1.00 | 0.00 |
| ATOM<br>O | 3069 | O    | THR | X | 204 | 9.307  | 10.115 | -23.153 | 1.00 | 0.00 |
| ATOM<br>N | 3070 | N    | TYR | X | 205 | 8.562  | 10.885 | -25.096 | 1.00 | 0.00 |
| ATOM<br>H | 3071 | HN   | TYR | X | 205 | 8.681  | 11.208 | -26.032 | 1.00 | 0.00 |
| ATOM<br>C | 3072 | CA   | TYR | X | 205 | 7.200  | 10.918 | -24.528 | 1.00 | 0.00 |
| ATOM<br>H | 3073 | HA   | TYR | X | 205 | 7.125  | 10.463 | -23.551 | 1.00 | 0.00 |
| ATOM<br>C | 3074 | CB   | TYR | X | 205 | 6.660  | 12.303 | -24.532 | 1.00 | 0.00 |
| ATOM<br>H | 3075 | HB1  | TYR | X | 205 | 5.596  | 12.351 | -24.218 | 1.00 | 0.00 |







|           |      |      |     |   |     |        |        |         |      |      |
|-----------|------|------|-----|---|-----|--------|--------|---------|------|------|
| ATOM<br>N | 3151 | NE2  | GLN | X | 209 | -5.883 | 0.707  | -27.238 | 1.00 | 0.00 |
| ATOM<br>H | 3152 | HE21 | GLN | X | 209 | -5.185 | 0.678  | -27.954 | 1.00 | 0.00 |
| ATOM<br>H | 3153 | HE22 | GLN | X | 209 | -6.559 | -0.021 | -27.128 | 1.00 | 0.00 |
| ATOM<br>C | 3154 | C    | GLN | X | 209 | -5.243 | 3.472  | -23.626 | 1.00 | 0.00 |
| ATOM<br>O | 3155 | O    | GLN | X | 209 | -4.540 | 2.515  | -23.359 | 1.00 | 0.00 |
| ATOM<br>N | 3156 | N    | TYR | X | 210 | -6.384 | 3.637  | -22.969 | 1.00 | 0.00 |
| ATOM<br>H | 3157 | HN   | TYR | X | 210 | -6.899 | 4.484  | -23.079 | 1.00 | 0.00 |
| ATOM<br>C | 3158 | CA   | TYR | X | 210 | -6.897 | 2.584  | -22.093 | 1.00 | 0.00 |
| ATOM<br>H | 3159 | HA   | TYR | X | 210 | -6.637 | 1.579  | -22.391 | 1.00 | 0.00 |
| ATOM<br>C | 3160 | CB   | TYR | X | 210 | -6.594 | 2.906  | -20.588 | 1.00 | 0.00 |
| ATOM<br>H | 3161 | HB1  | TYR | X | 210 | -5.503 | 2.987  | -20.394 | 1.00 | 0.00 |
| ATOM<br>H | 3162 | HB2  | TYR | X | 210 | -6.912 | 2.019  | -20.000 | 1.00 | 0.00 |
| ATOM<br>C | 3163 | CG   | TYR | X | 210 | -7.189 | 4.166  | -20.052 | 1.00 | 0.00 |
| ATOM<br>C | 3164 | CD1  | TYR | X | 210 | -6.472 | 5.390  | -20.119 | 1.00 | 0.00 |
| ATOM<br>H | 3165 | HD1  | TYR | X | 210 | -5.563 | 5.280  | -20.691 | 1.00 | 0.00 |
| ATOM<br>C | 3166 | CE1  | TYR | X | 210 | -6.988 | 6.616  | -19.664 | 1.00 | 0.00 |
| ATOM<br>H | 3167 | HE1  | TYR | X | 210 | -6.360 | 7.489  | -19.764 | 1.00 | 0.00 |
| ATOM<br>C | 3168 | CZ   | TYR | X | 210 | -8.079 | 6.520  | -18.855 | 1.00 | 0.00 |
| ATOM<br>O | 3169 | OH   | TYR | X | 210 | -8.393 | 7.702  | -18.140 | 1.00 | 0.00 |
| ATOM<br>H | 3170 | HH   | TYR | X | 210 | -9.094 | 7.555  | -17.500 | 1.00 | 0.00 |
| ATOM<br>C | 3171 | CD2  | TYR | X | 210 | -8.263 | 4.130  | -19.190 | 1.00 | 0.00 |
| ATOM<br>H | 3172 | HD2  | TYR | X | 210 | -8.852 | 3.226  | -19.142 | 1.00 | 0.00 |
| ATOM<br>C | 3173 | CE2  | TYR | X | 210 | -8.756 | 5.328  | -18.646 | 1.00 | 0.00 |
| ATOM<br>H | 3174 | HE2  | TYR | X | 210 | -9.687 | 5.214  | -18.111 | 1.00 | 0.00 |
| ATOM<br>C | 3175 | C    | TYR | X | 210 | -8.389 | 2.554  | -22.383 | 1.00 | 0.00 |

|      |      |   |     |   |     |         |        |         |      |      |
|------|------|---|-----|---|-----|---------|--------|---------|------|------|
| ATOM | 3176 | O | TYR | X | 210 | -9.160  | 2.181  | -21.508 | 1.00 | 0.00 |
| ATOM | 3177 | N | ASN | X | 211 | -8.788  | 2.931  | -23.634 | 1.00 | 0.00 |
| ATOM | 3178 | H | ASN | X | 211 | -8.122  | 3.362  | -24.238 | 1.00 | 0.00 |
| ATOM | 3179 | C | ASN | X | 211 | -10.157 | 2.677  | -24.150 | 1.00 | 0.00 |
| ATOM | 3180 | H | ASN | X | 211 | -10.893 | 3.091  | -23.477 | 1.00 | 0.00 |
| ATOM | 3181 | C | ASN | X | 211 | -10.333 | 3.251  | -25.565 | 1.00 | 0.00 |
| ATOM | 3182 | H | ASN | X | 211 | -9.602  | 2.859  | -26.304 | 1.00 | 0.00 |
| ATOM | 3183 | H | ASN | X | 211 | -10.235 | 4.357  | -25.596 | 1.00 | 0.00 |
| ATOM | 3184 | C | ASN | X | 211 | -11.729 | 2.970  | -26.176 | 1.00 | 0.00 |
| ATOM | 3185 | O | ASN | X | 211 | -12.605 | 3.779  | -26.141 | 1.00 | 0.00 |
| ATOM | 3186 | N | ASN | X | 211 | -11.920 | 1.809  | -26.885 | 1.00 | 0.00 |
| ATOM | 3187 | H | ASN | X | 211 | -11.140 | 1.194  | -26.992 | 1.00 | 0.00 |
| ATOM | 3188 | H | ASN | X | 211 | -12.832 | 1.426  | -27.037 | 1.00 | 0.00 |
| ATOM | 3189 | C | ASN | X | 211 | -10.364 | 1.164  | -24.184 | 1.00 | 0.00 |
| ATOM | 3190 | O | ASN | X | 211 | -11.482 | 0.751  | -23.969 | 1.00 | 0.00 |
| ATOM | 3191 | N | SER | X | 212 | -9.313  | 0.319  | -24.462 | 1.00 | 0.00 |
| ATOM | 3192 | H | SER | X | 212 | -8.405  | 0.623  | -24.741 | 1.00 | 0.00 |
| ATOM | 3193 | C | SER | X | 212 | -9.671  | -1.083 | -24.866 | 1.00 | 0.00 |
| ATOM | 3194 | H | SER | X | 212 | -10.290 | -1.445 | -24.058 | 1.00 | 0.00 |
| ATOM | 3195 | C | SER | X | 212 | -10.527 | -1.214 | -26.238 | 1.00 | 0.00 |
| ATOM | 3196 | H | SER | X | 212 | -11.540 | -0.857 | -25.956 | 1.00 | 0.00 |
| ATOM | 3197 | H | SER | X | 212 | -10.612 | -2.247 | -26.639 | 1.00 | 0.00 |
| ATOM | 3198 | O | SER | X | 212 | -9.854  | -0.432 | -27.291 | 1.00 | 0.00 |
| ATOM | 3199 | H | SER | X | 212 | -9.048  | -0.941 | -27.410 | 1.00 | 0.00 |
| ATOM | 3200 | C | SER | X | 212 | -8.491  | -1.965 | -25.043 | 1.00 | 0.00 |



|           |      |     |           |         |        |         |      |      |
|-----------|------|-----|-----------|---------|--------|---------|------|------|
| ATOM<br>O | 3201 | O   | SER X 212 | -7.400  | -1.529 | -25.426 | 1.00 | 0.00 |
| ATOM<br>N | 3202 | N   | TYR X 213 | -8.529  | -3.278 | -24.639 | 1.00 | 0.00 |
| ATOM<br>H | 3203 | HN  | TYR X 213 | -9.333  | -3.592 | -24.139 | 1.00 | 0.00 |
| ATOM<br>C | 3204 | CA  | TYR X 213 | -7.522  | -4.208 | -24.923 | 1.00 | 0.00 |
| ATOM<br>H | 3205 | HA  | TYR X 213 | -6.606  | -3.877 | -24.457 | 1.00 | 0.00 |
| ATOM<br>C | 3206 | CB  | TYR X 213 | -8.007  | -5.538 | -24.352 | 1.00 | 0.00 |
| ATOM<br>H | 3207 | HB1 | TYR X 213 | -7.194  | -6.255 | -24.598 | 1.00 | 0.00 |
| ATOM<br>H | 3208 | HB2 | TYR X 213 | -8.986  | -5.771 | -24.822 | 1.00 | 0.00 |
| ATOM<br>C | 3209 | CG  | TYR X 213 | -8.207  | -5.630 | -22.849 | 1.00 | 0.00 |
| ATOM<br>C | 3210 | CD1 | TYR X 213 | -7.358  | -5.001 | -21.918 | 1.00 | 0.00 |
| ATOM<br>H | 3211 | HD1 | TYR X 213 | -6.524  | -4.394 | -22.240 | 1.00 | 0.00 |
| ATOM<br>C | 3212 | CE1 | TYR X 213 | -7.598  | -5.097 | -20.537 | 1.00 | 0.00 |
| ATOM<br>H | 3213 | HE1 | TYR X 213 | -6.847  | -4.578 | -19.961 | 1.00 | 0.00 |
| ATOM<br>C | 3214 | CZ  | TYR X 213 | -8.702  | -5.708 | -20.060 | 1.00 | 0.00 |
| ATOM<br>O | 3215 | OH  | TYR X 213 | -8.814  | -5.888 | -18.669 | 1.00 | 0.00 |
| ATOM<br>H | 3216 | HH  | TYR X 213 | -8.119  | -5.398 | -18.222 | 1.00 | 0.00 |
| ATOM<br>C | 3217 | CD2 | TYR X 213 | -9.336  | -6.288 | -22.292 | 1.00 | 0.00 |
| ATOM<br>H | 3218 | HD2 | TYR X 213 | -10.021 | -6.845 | -22.915 | 1.00 | 0.00 |
| ATOM<br>C | 3219 | CE2 | TYR X 213 | -9.521  | -6.338 | -20.892 | 1.00 | 0.00 |
| ATOM<br>H | 3220 | HE2 | TYR X 213 | -10.313 | -7.021 | -20.623 | 1.00 | 0.00 |
| ATOM<br>C | 3221 | C   | TYR X 213 | -7.085  | -4.484 | -26.394 | 1.00 | 0.00 |
| ATOM<br>O | 3222 | O   | TYR X 213 | -7.980  | -4.695 | -27.164 | 1.00 | 0.00 |
| ATOM<br>N | 3223 | N   | PRO X 214 | -5.808  | -4.724 | -26.837 | 1.00 | 0.00 |
| ATOM<br>C | 3224 | CD  | PRO X 214 | -5.582  | -5.242 | -28.166 | 1.00 | 0.00 |
| ATOM<br>H | 3225 | HD1 | PRO X 214 | -5.726  | -4.358 | -28.823 | 1.00 | 0.00 |

|           |      |     |     |   |     |        |        |         |      |      |
|-----------|------|-----|-----|---|-----|--------|--------|---------|------|------|
| ATOM<br>H | 3226 | HD2 | PRO | X | 214 | -6.254 | -6.027 | -28.576 | 1.00 | 0.00 |
| ATOM<br>C | 3227 | CA  | PRO | X | 214 | -4.553 | -4.281 | -26.322 | 1.00 | 0.00 |
| ATOM<br>H | 3228 | HA  | PRO | X | 214 | -4.265 | -4.820 | -25.432 | 1.00 | 0.00 |
| ATOM<br>C | 3229 | CB  | PRO | X | 214 | -3.421 | -4.720 | -27.281 | 1.00 | 0.00 |
| ATOM<br>H | 3230 | HB1 | PRO | X | 214 | -2.450 | -4.955 | -26.795 | 1.00 | 0.00 |
| ATOM<br>H | 3231 | HB2 | PRO | X | 214 | -3.312 | -3.868 | -27.987 | 1.00 | 0.00 |
| ATOM<br>C | 3232 | CG  | PRO | X | 214 | -4.183 | -5.821 | -28.152 | 1.00 | 0.00 |
| ATOM<br>H | 3233 | HG1 | PRO | X | 214 | -3.855 | -6.016 | -29.196 | 1.00 | 0.00 |
| ATOM<br>H | 3234 | HG2 | PRO | X | 214 | -4.202 | -6.768 | -27.571 | 1.00 | 0.00 |
| ATOM<br>C | 3235 | C   | PRO | X | 214 | -4.395 | -2.858 | -25.925 | 1.00 | 0.00 |
| ATOM<br>O | 3236 | O   | PRO | X | 214 | -4.752 | -2.013 | -26.703 | 1.00 | 0.00 |
| ATOM<br>N | 3237 | N   | TRP | X | 215 | -3.937 | -2.518 | -24.737 | 1.00 | 0.00 |
| ATOM<br>H | 3238 | HN  | TRP | X | 215 | -3.672 | -3.161 | -24.023 | 1.00 | 0.00 |
| ATOM<br>C | 3239 | CA  | TRP | X | 215 | -3.621 | -1.102 | -24.286 | 1.00 | 0.00 |
| ATOM<br>H | 3240 | HA  | TRP | X | 215 | -4.481 | -0.513 | -24.567 | 1.00 | 0.00 |
| ATOM<br>C | 3241 | CB  | TRP | X | 215 | -3.506 | -1.017 | -22.721 | 1.00 | 0.00 |
| ATOM<br>H | 3242 | HB1 | TRP | X | 215 | -3.000 | -0.051 | -22.508 | 1.00 | 0.00 |
| ATOM<br>H | 3243 | HB2 | TRP | X | 215 | -2.754 | -1.783 | -22.434 | 1.00 | 0.00 |
| ATOM<br>C | 3244 | CG  | TRP | X | 215 | -4.677 | -1.079 | -21.934 | 1.00 | 0.00 |
| ATOM<br>C | 3245 | CD1 | TRP | X | 215 | -5.965 | -1.276 | -22.312 | 1.00 | 0.00 |
| ATOM<br>H | 3246 | HD1 | TRP | X | 215 | -6.241 | -1.388 | -23.350 | 1.00 | 0.00 |
| ATOM<br>N | 3247 | NE1 | TRP | X | 215 | -6.791 | -1.311 | -21.251 | 1.00 | 0.00 |
| ATOM<br>H | 3248 | HE1 | TRP | X | 215 | -7.753 | -1.147 | -21.226 | 1.00 | 0.00 |
| ATOM<br>C | 3249 | CE2 | TRP | X | 215 | -6.056 | -1.352 | -20.075 | 1.00 | 0.00 |
| ATOM<br>C | 3250 | CD2 | TRP | X | 215 | -4.693 | -1.101 | -20.437 | 1.00 | 0.00 |



|           |      |     |           |       |        |         |      |      |
|-----------|------|-----|-----------|-------|--------|---------|------|------|
| ATOM<br>H | 3276 | HN  | PHE X 217 | 0.826 | 0.794  | -27.386 | 1.00 | 0.00 |
| ATOM<br>C | 3277 | CA  | PHE X 217 | 1.164 | 2.756  | -26.929 | 1.00 | 0.00 |
| ATOM<br>H | 3278 | HA  | PHE X 217 | 0.753 | 3.556  | -26.332 | 1.00 | 0.00 |
| ATOM<br>C | 3279 | CB  | PHE X 217 | 2.553 | 2.447  | -26.319 | 1.00 | 0.00 |
| ATOM<br>H | 3280 | HB1 | PHE X 217 | 3.167 | 3.373  | -26.331 | 1.00 | 0.00 |
| ATOM<br>H | 3281 | HB2 | PHE X 217 | 3.156 | 1.652  | -26.807 | 1.00 | 0.00 |
| ATOM<br>C | 3282 | CG  | PHE X 217 | 2.493 | 1.927  | -24.851 | 1.00 | 0.00 |
| ATOM<br>C | 3283 | CD1 | PHE X 217 | 3.071 | 2.714  | -23.815 | 1.00 | 0.00 |
| ATOM<br>H | 3284 | HD1 | PHE X 217 | 3.369 | 3.726  | -24.045 | 1.00 | 0.00 |
| ATOM<br>C | 3285 | CE1 | PHE X 217 | 3.082 | 2.383  | -22.524 | 1.00 | 0.00 |
| ATOM<br>H | 3286 | HE1 | PHE X 217 | 3.565 | 2.953  | -21.744 | 1.00 | 0.00 |
| ATOM<br>C | 3287 | CZ  | PHE X 217 | 2.551 | 1.119  | -22.094 | 1.00 | 0.00 |
| ATOM<br>H | 3288 | HZ  | PHE X 217 | 2.582 | 0.889  | -21.039 | 1.00 | 0.00 |
| ATOM<br>C | 3289 | CD2 | PHE X 217 | 2.049 | 0.637  | -24.509 | 1.00 | 0.00 |
| ATOM<br>H | 3290 | HD2 | PHE X 217 | 1.635 | -0.145 | -25.128 | 1.00 | 0.00 |
| ATOM<br>C | 3291 | CE2 | PHE X 217 | 1.990 | 0.301  | -23.125 | 1.00 | 0.00 |
| ATOM<br>H | 3292 | HE2 | PHE X 217 | 1.678 | -0.659 | -22.741 | 1.00 | 0.00 |
| ATOM<br>C | 3293 | C   | PHE X 217 | 1.434 | 3.441  | -28.312 | 1.00 | 0.00 |
| ATOM<br>O | 3294 | O   | PHE X 217 | 1.606 | 2.779  | -29.336 | 1.00 | 0.00 |
| ATOM<br>N | 3295 | N   | GLY X 218 | 1.428 | 4.733  | -28.428 | 1.00 | 0.00 |
| ATOM<br>H | 3296 | HN  | GLY X 218 | 1.323 | 5.347  | -27.649 | 1.00 | 0.00 |
| ATOM<br>C | 3297 | CA  | GLY X 218 | 1.767 | 5.465  | -29.622 | 1.00 | 0.00 |
| ATOM<br>H | 3298 | HA1 | GLY X 218 | 1.531 | 6.512  | -29.502 | 1.00 | 0.00 |
| ATOM<br>H | 3299 | HA2 | GLY X 218 | 1.236 | 5.080  | -30.480 | 1.00 | 0.00 |
| ATOM<br>C | 3300 | C   | GLY X 218 | 3.281 | 5.413  | -29.939 | 1.00 | 0.00 |

|           |      |      |           |       |       |         |      |      |
|-----------|------|------|-----------|-------|-------|---------|------|------|
| ATOM<br>O | 3301 | O    | GLY X 218 | 4.093 | 4.713 | -29.312 | 1.00 | 0.00 |
| ATOM<br>N | 3302 | N    | GLN X 219 | 3.743 | 6.052 | -31.072 | 1.00 | 0.00 |
| ATOM<br>H | 3303 | HN   | GLN X 219 | 3.117 | 6.414 | -31.758 | 1.00 | 0.00 |
| ATOM<br>C | 3304 | CA   | GLN X 219 | 5.122 | 5.951 | -31.643 | 1.00 | 0.00 |
| ATOM<br>H | 3305 | HA   | GLN X 219 | 5.161 | 4.873 | -31.692 | 1.00 | 0.00 |
| ATOM<br>C | 3306 | CB   | GLN X 219 | 5.368 | 6.485 | -33.117 | 1.00 | 0.00 |
| ATOM<br>H | 3307 | HB1  | GLN X 219 | 6.470 | 6.387 | -33.221 | 1.00 | 0.00 |
| ATOM<br>H | 3308 | HB2  | GLN X 219 | 5.019 | 7.539 | -33.099 | 1.00 | 0.00 |
| ATOM<br>C | 3309 | CG   | GLN X 219 | 4.575 | 5.637 | -34.164 | 1.00 | 0.00 |
| ATOM<br>H | 3310 | HG1  | GLN X 219 | 3.477 | 5.572 | -34.008 | 1.00 | 0.00 |
| ATOM<br>H | 3311 | HG2  | GLN X 219 | 5.159 | 4.708 | -34.336 | 1.00 | 0.00 |
| ATOM<br>C | 3312 | CD   | GLN X 219 | 4.555 | 6.360 | -35.482 | 1.00 | 0.00 |
| ATOM<br>O | 3313 | OE1  | GLN X 219 | 4.075 | 7.515 | -35.703 | 1.00 | 0.00 |
| ATOM<br>N | 3314 | NE2  | GLN X 219 | 5.004 | 5.686 | -36.613 | 1.00 | 0.00 |
| ATOM<br>H | 3315 | HE21 | GLN X 219 | 5.195 | 4.705 | -36.592 | 1.00 | 0.00 |
| ATOM<br>H | 3316 | HE22 | GLN X 219 | 5.072 | 6.206 | -37.465 | 1.00 | 0.00 |
| ATOM<br>C | 3317 | C    | GLN X 219 | 6.227 | 6.410 | -30.689 | 1.00 | 0.00 |
| ATOM<br>O | 3318 | O    | GLN X 219 | 7.323 | 5.870 | -30.747 | 1.00 | 0.00 |
| ATOM<br>N | 3319 | N    | GLY X 220 | 6.062 | 7.487 | -29.944 | 1.00 | 0.00 |
| ATOM<br>H | 3320 | HN   | GLY X 220 | 5.197 | 7.955 | -29.781 | 1.00 | 0.00 |
| ATOM<br>C | 3321 | CA   | GLY X 220 | 7.191 | 7.955 | -29.124 | 1.00 | 0.00 |
| ATOM<br>H | 3322 | HA1  | GLY X 220 | 8.015 | 7.271 | -28.981 | 1.00 | 0.00 |
| ATOM<br>H | 3323 | HA2  | GLY X 220 | 6.706 | 8.213 | -28.194 | 1.00 | 0.00 |
| ATOM<br>C | 3324 | C    | GLY X 220 | 7.587 | 9.312 | -29.691 | 1.00 | 0.00 |
| ATOM<br>O | 3325 | O    | GLY X 220 | 7.959 | 9.319 | -30.847 | 1.00 | 0.00 |

|           |      |      |           |        |        |         |      |      |
|-----------|------|------|-----------|--------|--------|---------|------|------|
| ATOM<br>N | 3326 | N    | THR X 221 | 7.667  | 10.359 | -28.884 | 1.00 | 0.00 |
| ATOM<br>H | 3327 | HN   | THR X 221 | 7.382  | 10.258 | -27.934 | 1.00 | 0.00 |
| ATOM<br>C | 3328 | CA   | THR X 221 | 8.102  | 11.710 | -29.323 | 1.00 | 0.00 |
| ATOM<br>H | 3329 | HA   | THR X 221 | 8.488  | 11.658 | -30.330 | 1.00 | 0.00 |
| ATOM<br>C | 3330 | CB   | THR X 221 | 7.059  | 12.822 | -29.306 | 1.00 | 0.00 |
| ATOM<br>H | 3331 | HB   | THR X 221 | 6.633  | 12.761 | -28.281 | 1.00 | 0.00 |
| ATOM<br>O | 3332 | OG1  | THR X 221 | 6.150  | 12.579 | -30.370 | 1.00 | 0.00 |
| ATOM<br>H | 3333 | HG1  | THR X 221 | 6.590  | 13.057 | -31.078 | 1.00 | 0.00 |
| ATOM<br>C | 3334 | CG2  | THR X 221 | 7.690  | 14.202 | -29.518 | 1.00 | 0.00 |
| ATOM<br>H | 3335 | HG21 | THR X 221 | 8.338  | 14.466 | -28.655 | 1.00 | 0.00 |
| ATOM<br>H | 3336 | HG22 | THR X 221 | 6.920  | 14.988 | -29.672 | 1.00 | 0.00 |
| ATOM<br>H | 3337 | HG23 | THR X 221 | 8.276  | 14.250 | -30.460 | 1.00 | 0.00 |
| ATOM<br>C | 3338 | C    | THR X 221 | 9.324  | 12.043 | -28.533 | 1.00 | 0.00 |
| ATOM<br>O | 3339 | O    | THR X 221 | 9.256  | 12.257 | -27.306 | 1.00 | 0.00 |
| ATOM<br>N | 3340 | N    | LYS X 222 | 10.454 | 12.237 | -29.182 | 1.00 | 0.00 |
| ATOM<br>H | 3341 | HN   | LYS X 222 | 10.515 | 12.095 | -30.167 | 1.00 | 0.00 |
| ATOM<br>C | 3342 | CA   | LYS X 222 | 11.744 | 12.636 | -28.563 | 1.00 | 0.00 |
| ATOM<br>H | 3343 | HA   | LYS X 222 | 11.882 | 12.259 | -27.560 | 1.00 | 0.00 |
| ATOM<br>C | 3344 | CB   | LYS X 222 | 12.940 | 12.253 | -29.467 | 1.00 | 0.00 |
| ATOM<br>H | 3345 | HB1  | LYS X 222 | 13.803 | 12.858 | -29.116 | 1.00 | 0.00 |
| ATOM<br>H | 3346 | HB2  | LYS X 222 | 12.807 | 12.436 | -30.554 | 1.00 | 0.00 |
| ATOM<br>C | 3347 | CG   | LYS X 222 | 13.311 | 10.763 | -29.494 | 1.00 | 0.00 |
| ATOM<br>H | 3348 | HG1  | LYS X 222 | 12.584 | 10.106 | -30.017 | 1.00 | 0.00 |
| ATOM<br>H | 3349 | HG2  | LYS X 222 | 13.361 | 10.402 | -28.445 | 1.00 | 0.00 |
| ATOM<br>C | 3350 | CD   | LYS X 222 | 14.666 | 10.542 | -30.193 | 1.00 | 0.00 |



|           |      |      |           |        |        |         |      |      |
|-----------|------|------|-----------|--------|--------|---------|------|------|
| ATOM<br>C | 3376 | C    | VAL X 223 | 13.966 | 16.266 | -26.805 | 1.00 | 0.00 |
| ATOM<br>O | 3377 | O    | VAL X 223 | 14.251 | 15.721 | -25.727 | 1.00 | 0.00 |
| ATOM<br>N | 3378 | N    | GLU X 224 | 14.900 | 16.710 | -27.635 | 1.00 | 0.00 |
| ATOM<br>H | 3379 | HN   | GLU X 224 | 14.527 | 17.103 | -28.472 | 1.00 | 0.00 |
| ATOM<br>C | 3380 | CA   | GLU X 224 | 16.370 | 16.726 | -27.502 | 1.00 | 0.00 |
| ATOM<br>H | 3381 | HA   | GLU X 224 | 16.570 | 15.920 | -26.811 | 1.00 | 0.00 |
| ATOM<br>C | 3382 | CB   | GLU X 224 | 17.131 | 16.243 | -28.755 | 1.00 | 0.00 |
| ATOM<br>H | 3383 | HB1  | GLU X 224 | 18.228 | 16.350 | -28.611 | 1.00 | 0.00 |
| ATOM<br>H | 3384 | HB2  | GLU X 224 | 16.941 | 16.783 | -29.707 | 1.00 | 0.00 |
| ATOM<br>C | 3385 | CG   | GLU X 224 | 16.829 | 14.771 | -29.109 | 1.00 | 0.00 |
| ATOM<br>H | 3386 | HG1  | GLU X 224 | 15.934 | 14.784 | -29.766 | 1.00 | 0.00 |
| ATOM<br>H | 3387 | HG2  | GLU X 224 | 16.625 | 14.147 | -28.212 | 1.00 | 0.00 |
| ATOM<br>C | 3388 | CD   | GLU X 224 | 17.878 | 14.212 | -30.048 | 1.00 | 0.00 |
| ATOM<br>O | 3389 | OE1  | GLU X 224 | 18.479 | 13.102 | -29.704 | 1.00 | 0.00 |
| ATOM<br>O | 3390 | OE2  | GLU X 224 | 18.047 | 14.706 | -31.201 | 1.00 | 0.00 |
| ATOM<br>C | 3391 | C    | GLU X 224 | 16.756 | 18.034 | -26.981 | 1.00 | 0.00 |
| ATOM<br>O | 3392 | O    | GLU X 224 | 16.024 | 19.060 | -27.025 | 1.00 | 0.00 |
| ATOM<br>N | 3393 | N    | ILE X 225 | 17.982 | 18.110 | -26.452 | 1.00 | 0.00 |
| ATOM<br>H | 3394 | HN   | ILE X 225 | 18.560 | 17.311 | -26.299 | 1.00 | 0.00 |
| ATOM<br>C | 3395 | CA   | ILE X 225 | 18.664 | 19.361 | -26.236 | 1.00 | 0.00 |
| ATOM<br>H | 3396 | HA   | ILE X 225 | 17.934 | 20.089 | -25.916 | 1.00 | 0.00 |
| ATOM<br>C | 3397 | CB   | ILE X 225 | 19.686 | 19.270 | -25.060 | 1.00 | 0.00 |
| ATOM<br>H | 3398 | HB   | ILE X 225 | 19.122 | 18.771 | -24.243 | 1.00 | 0.00 |
| ATOM<br>C | 3399 | CG2  | ILE X 225 | 20.912 | 18.388 | -25.462 | 1.00 | 0.00 |
| ATOM<br>H | 3400 | HG21 | ILE X 225 | 21.563 | 19.075 | -26.044 | 1.00 | 0.00 |







|           |      |      |     |   |     |         |         |         |      |      |
|-----------|------|------|-----|---|-----|---------|---------|---------|------|------|
| ATOM<br>H | 3451 | HB1  | ASN | X | 227 | -16.427 | -6.964  | -41.693 | 1.00 | 0.00 |
| ATOM<br>H | 3452 | HB2  | ASN | X | 227 | -17.559 | -5.637  | -41.689 | 1.00 | 0.00 |
| ATOM<br>C | 3453 | CG   | ASN | X | 227 | -17.109 | -6.364  | -43.710 | 1.00 | 0.00 |
| ATOM<br>O | 3454 | OD1  | ASN | X | 227 | -17.292 | -5.242  | -44.150 | 1.00 | 0.00 |
| ATOM<br>N | 3455 | ND2  | ASN | X | 227 | -16.852 | -7.421  | -44.469 | 1.00 | 0.00 |
| ATOM<br>H | 3456 | HD21 | ASN | X | 227 | -16.427 | -8.261  | -44.131 | 1.00 | 0.00 |
| ATOM<br>H | 3457 | HD22 | ASN | X | 227 | -16.911 | -7.245  | -45.452 | 1.00 | 0.00 |
| ATOM<br>C | 3458 | C    | ASN | X | 227 | -18.873 | -7.575  | -40.437 | 1.00 | 0.00 |
| ATOM<br>O | 3459 | O    | ASN | X | 227 | -19.671 | -6.805  | -39.900 | 1.00 | 0.00 |
| ATOM<br>N | 3460 | N    | LEU | X | 228 | -18.280 | -8.558  | -39.797 | 1.00 | 0.00 |
| ATOM<br>H | 3461 | HN   | LEU | X | 228 | -17.593 | -9.109  | -40.266 | 1.00 | 0.00 |
| ATOM<br>C | 3462 | CA   | LEU | X | 228 | -18.555 | -8.840  | -38.366 | 1.00 | 0.00 |
| ATOM<br>H | 3463 | HA   | LEU | X | 228 | -19.625 | -8.985  | -38.357 | 1.00 | 0.00 |
| ATOM<br>C | 3464 | CB   | LEU | X | 228 | -17.924 | -10.252 | -37.965 | 1.00 | 0.00 |
| ATOM<br>H | 3465 | HB1  | LEU | X | 228 | -16.845 | -10.089 | -38.176 | 1.00 | 0.00 |
| ATOM<br>H | 3466 | HB2  | LEU | X | 228 | -18.411 | -10.909 | -38.717 | 1.00 | 0.00 |
| ATOM<br>C | 3467 | CG   | LEU | X | 228 | -18.231 | -10.661 | -36.519 | 1.00 | 0.00 |
| ATOM<br>H | 3468 | HG   | LEU | X | 228 | -17.570 | -10.044 | -35.874 | 1.00 | 0.00 |
| ATOM<br>C | 3469 | CD1  | LEU | X | 228 | -19.666 | -10.293 | -36.040 | 1.00 | 0.00 |
| ATOM<br>H | 3470 | HD11 | LEU | X | 228 | -19.860 | -10.800 | -35.071 | 1.00 | 0.00 |
| ATOM<br>H | 3471 | HD12 | LEU | X | 228 | -20.566 | -10.484 | -36.662 | 1.00 | 0.00 |
| ATOM<br>H | 3472 | HD13 | LEU | X | 228 | -19.490 | -9.215  | -35.838 | 1.00 | 0.00 |
| ATOM<br>C | 3473 | CD2  | LEU | X | 228 | -17.726 | -12.057 | -36.298 | 1.00 | 0.00 |
| ATOM<br>H | 3474 | HD21 | LEU | X | 228 | -16.914 | -12.398 | -36.975 | 1.00 | 0.00 |
| ATOM<br>H | 3475 | HD22 | LEU | X | 228 | -18.631 | -12.659 | -36.528 | 1.00 | 0.00 |

|           |      |      |     |   |     |         |         |         |      |      |
|-----------|------|------|-----|---|-----|---------|---------|---------|------|------|
| ATOM<br>H | 3476 | HD23 | LEU | X | 228 | -17.449 | -12.221 | -35.235 | 1.00 | 0.00 |
| ATOM<br>C | 3477 | C    | LEU | X | 228 | -18.050 | -7.705  | -37.396 | 1.00 | 0.00 |
| ATOM<br>O | 3478 | O    | LEU | X | 228 | -16.853 | -7.501  | -37.126 | 1.00 | 0.00 |
| ATOM<br>N | 3479 | N    | CYS | X | 229 | -19.029 | -7.033  | -36.780 | 1.00 | 0.00 |
| ATOM<br>H | 3480 | HN   | CYS | X | 229 | -19.981 | -7.230  | -37.002 | 1.00 | 0.00 |
| ATOM<br>C | 3481 | CA   | CYS | X | 229 | -18.834 | -5.973  | -35.787 | 1.00 | 0.00 |
| ATOM<br>H | 3482 | HA   | CYS | X | 229 | -18.311 | -5.193  | -36.320 | 1.00 | 0.00 |
| ATOM<br>C | 3483 | CB   | CYS | X | 229 | -20.208 | -5.491  | -35.456 | 1.00 | 0.00 |
| ATOM<br>H | 3484 | HB1  | CYS | X | 229 | -20.271 | -4.805  | -34.584 | 1.00 | 0.00 |
| ATOM<br>H | 3485 | HB2  | CYS | X | 229 | -20.896 | -6.332  | -35.223 | 1.00 | 0.00 |
| ATOM<br>S | 3486 | SG   | CYS | X | 229 | -20.965 | -4.590  | -36.862 | 1.00 | 0.00 |
| ATOM<br>C | 3487 | C    | CYS | X | 229 | -18.143 | -6.466  | -34.485 | 1.00 | 0.00 |
| ATOM<br>O | 3488 | O    | CYS | X | 229 | -18.366 | -7.513  | -33.887 | 1.00 | 0.00 |
| ATOM<br>N | 3489 | N    | PRO | X | 230 | -17.240 | -5.677  | -33.931 | 1.00 | 0.00 |
| ATOM<br>C | 3490 | CD   | PRO | X | 230 | -16.607 | -4.577  | -34.782 | 1.00 | 0.00 |
| ATOM<br>H | 3491 | HD1  | PRO | X | 230 | -17.303 | -3.722  | -34.925 | 1.00 | 0.00 |
| ATOM<br>H | 3492 | HD2  | PRO | X | 230 | -16.277 | -4.982  | -35.763 | 1.00 | 0.00 |
| ATOM<br>C | 3493 | CA   | PRO | X | 230 | -16.336 | -6.070  | -32.854 | 1.00 | 0.00 |
| ATOM<br>H | 3494 | HA   | PRO | X | 230 | -16.264 | -7.138  | -32.711 | 1.00 | 0.00 |
| ATOM<br>C | 3495 | CB   | PRO | X | 230 | -14.997 | -5.551  | -33.416 | 1.00 | 0.00 |
| ATOM<br>H | 3496 | HB1  | PRO | X | 230 | -14.528 | -6.378  | -33.991 | 1.00 | 0.00 |
| ATOM<br>H | 3497 | HB2  | PRO | X | 230 | -14.286 | -5.448  | -32.568 | 1.00 | 0.00 |
| ATOM<br>C | 3498 | CG   | PRO | X | 230 | -15.321 | -4.220  | -34.008 | 1.00 | 0.00 |
| ATOM<br>H | 3499 | HG1  | PRO | X | 230 | -15.649 | -3.581  | -33.161 | 1.00 | 0.00 |
| ATOM<br>H | 3500 | HG2  | PRO | X | 230 | -14.432 | -3.822  | -34.542 | 1.00 | 0.00 |











|           |      |      |     |   |     |         |        |         |      |      |
|-----------|------|------|-----|---|-----|---------|--------|---------|------|------|
| ATOM<br>H | 3601 | HB3  | ALA | X | 237 | -13.989 | 0.483  | -23.294 | 1.00 | 0.00 |
| ATOM<br>C | 3602 | C    | ALA | X | 237 | -13.425 | -1.389 | -21.457 | 1.00 | 0.00 |
| ATOM<br>O | 3603 | O    | ALA | X | 237 | -14.049 | -1.605 | -20.478 | 1.00 | 0.00 |
| ATOM<br>N | 3604 | N    | THR | X | 238 | -12.246 | -0.825 | -21.419 | 1.00 | 0.00 |
| ATOM<br>H | 3605 | HN   | THR | X | 238 | -11.804 | -0.621 | -22.289 | 1.00 | 0.00 |
| ATOM<br>C | 3606 | CA   | THR | X | 238 | -11.461 | -0.774 | -20.152 | 1.00 | 0.00 |
| ATOM<br>H | 3607 | HA   | THR | X | 238 | -11.811 | -1.568 | -19.509 | 1.00 | 0.00 |
| ATOM<br>C | 3608 | CB   | THR | X | 238 | -9.997  | -0.946 | -20.276 | 1.00 | 0.00 |
| ATOM<br>H | 3609 | HB   | THR | X | 238 | -9.408  | -0.586 | -19.405 | 1.00 | 0.00 |
| ATOM<br>O | 3610 | OG1  | THR | X | 238 | -9.470  | -0.358 | -21.487 | 1.00 | 0.00 |
| ATOM<br>H | 3611 | HG1  | THR | X | 238 | -9.536  | 0.598  | -21.426 | 1.00 | 0.00 |
| ATOM<br>C | 3612 | CG2  | THR | X | 238 | -9.816  | -2.473 | -20.528 | 1.00 | 0.00 |
| ATOM<br>H | 3613 | HG21 | THR | X | 238 | -10.134 | -2.765 | -21.552 | 1.00 | 0.00 |
| ATOM<br>H | 3614 | HG22 | THR | X | 238 | -10.337 | -3.117 | -19.788 | 1.00 | 0.00 |
| ATOM<br>H | 3615 | HG23 | THR | X | 238 | -8.748  | -2.772 | -20.462 | 1.00 | 0.00 |
| ATOM<br>C | 3616 | C    | THR | X | 238 | -11.777 | 0.536  | -19.350 | 1.00 | 0.00 |
| ATOM<br>O | 3617 | O    | THR | X | 238 | -11.388 | 0.748  | -18.201 | 1.00 | 0.00 |
| ATOM<br>N | 3618 | N    | ARG | X | 239 | -12.445 | 1.490  | -19.944 | 1.00 | 0.00 |
| ATOM<br>H | 3619 | HN   | ARG | X | 239 | -12.507 | 1.434  | -20.937 | 1.00 | 0.00 |
| ATOM<br>C | 3620 | CA   | ARG | X | 239 | -13.109 | 2.589  | -19.288 | 1.00 | 0.00 |
| ATOM<br>H | 3621 | HA   | ARG | X | 239 | -13.179 | 2.468  | -18.217 | 1.00 | 0.00 |
| ATOM<br>C | 3622 | CB   | ARG | X | 239 | -12.299 | 3.869  | -19.567 | 1.00 | 0.00 |
| ATOM<br>H | 3623 | HB1  | ARG | X | 239 | -12.514 | 4.266  | -20.583 | 1.00 | 0.00 |
| ATOM<br>H | 3624 | HB2  | ARG | X | 239 | -11.241 | 3.540  | -19.648 | 1.00 | 0.00 |
| ATOM<br>C | 3625 | CG   | ARG | X | 239 | -12.303 | 5.006  | -18.581 | 1.00 | 0.00 |







|           |      |     |           |         |        |         |      |      |
|-----------|------|-----|-----------|---------|--------|---------|------|------|
| ATOM<br>C | 3701 | CA  | TYR X 244 | -24.605 | 12.578 | -19.781 | 1.00 | 0.00 |
| ATOM<br>H | 3702 | HA  | TYR X 244 | -25.627 | 12.606 | -20.132 | 1.00 | 0.00 |
| ATOM<br>C | 3703 | CB  | TYR X 244 | -24.443 | 13.692 | -18.723 | 1.00 | 0.00 |
| ATOM<br>H | 3704 | HB1 | TYR X 244 | -24.862 | 13.369 | -17.747 | 1.00 | 0.00 |
| ATOM<br>H | 3705 | HB2 | TYR X 244 | -25.037 | 14.613 | -18.905 | 1.00 | 0.00 |
| ATOM<br>C | 3706 | CG  | TYR X 244 | -22.996 | 14.036 | -18.568 | 1.00 | 0.00 |
| ATOM<br>C | 3707 | CD1 | TYR X 244 | -22.122 | 13.344 | -17.629 | 1.00 | 0.00 |
| ATOM<br>H | 3708 | HD1 | TYR X 244 | -22.406 | 12.462 | -17.074 | 1.00 | 0.00 |
| ATOM<br>C | 3709 | CE1 | TYR X 244 | -20.780 | 13.765 | -17.649 | 1.00 | 0.00 |
| ATOM<br>H | 3710 | HE1 | TYR X 244 | -20.094 | 13.086 | -17.164 | 1.00 | 0.00 |
| ATOM<br>C | 3711 | CZ  | TYR X 244 | -20.366 | 14.963 | -18.300 | 1.00 | 0.00 |
| ATOM<br>O | 3712 | OH  | TYR X 244 | -18.994 | 15.211 | -18.360 | 1.00 | 0.00 |
| ATOM<br>H | 3713 | HH  | TYR X 244 | -18.785 | 16.004 | -18.860 | 1.00 | 0.00 |
| ATOM<br>C | 3714 | CD2 | TYR X 244 | -22.626 | 15.300 | -19.068 | 1.00 | 0.00 |
| ATOM<br>H | 3715 | HD2 | TYR X 244 | -23.328 | 15.933 | -19.590 | 1.00 | 0.00 |
| ATOM<br>C | 3716 | CE2 | TYR X 244 | -21.352 | 15.714 | -18.975 | 1.00 | 0.00 |
| ATOM<br>H | 3717 | HE2 | TYR X 244 | -21.049 | 16.623 | -19.473 | 1.00 | 0.00 |
| ATOM<br>C | 3718 | C   | TYR X 244 | -23.803 | 12.792 | -21.042 | 1.00 | 0.00 |
| ATOM<br>O | 3719 | O   | TYR X 244 | -24.311 | 13.440 | -21.975 | 1.00 | 0.00 |
| ATOM<br>N | 3720 | N   | ALA X 245 | -22.501 | 12.360 | -21.047 | 1.00 | 0.00 |
| ATOM<br>H | 3721 | HN  | ALA X 245 | -22.213 | 11.774 | -20.293 | 1.00 | 0.00 |
| ATOM<br>C | 3722 | CA  | ALA X 245 | -21.478 | 12.459 | -22.050 | 1.00 | 0.00 |
| ATOM<br>H | 3723 | HA  | ALA X 245 | -21.669 | 13.329 | -22.661 | 1.00 | 0.00 |
| ATOM<br>C | 3724 | CB  | ALA X 245 | -20.101 | 12.801 | -21.300 | 1.00 | 0.00 |
| ATOM<br>H | 3725 | HB1 | ALA X 245 | -20.186 | 13.785 | -20.791 | 1.00 | 0.00 |



|           |      |      |     |   |     |         |       |         |      |      |
|-----------|------|------|-----|---|-----|---------|-------|---------|------|------|
| ATOM<br>H | 3751 | HH2  | TRP | X | 246 | -26.191 | 9.737 | -29.552 | 1.00 | 0.00 |
| ATOM<br>C | 3752 | C    | TRP | X | 246 | -21.446 | 8.840 | -24.873 | 1.00 | 0.00 |
| ATOM<br>O | 3753 | O    | TRP | X | 246 | -21.578 | 9.574 | -25.828 | 1.00 | 0.00 |
| ATOM<br>N | 3754 | N    | ASN | X | 247 | -20.554 | 7.858 | -24.956 | 1.00 | 0.00 |
| ATOM<br>H | 3755 | HN   | ASN | X | 247 | -20.361 | 7.393 | -24.096 | 1.00 | 0.00 |
| ATOM<br>C | 3756 | CA   | ASN | X | 247 | -19.854 | 7.376 | -26.055 | 1.00 | 0.00 |
| ATOM<br>H | 3757 | HA   | ASN | X | 247 | -19.483 | 8.179 | -26.675 | 1.00 | 0.00 |
| ATOM<br>C | 3758 | CB   | ASN | X | 247 | -18.678 | 6.455 | -25.598 | 1.00 | 0.00 |
| ATOM<br>H | 3759 | HB1  | ASN | X | 247 | -18.963 | 5.432 | -25.270 | 1.00 | 0.00 |
| ATOM<br>H | 3760 | HB2  | ASN | X | 247 | -18.210 | 6.896 | -24.692 | 1.00 | 0.00 |
| ATOM<br>C | 3761 | CG   | ASN | X | 247 | -17.518 | 6.363 | -26.517 | 1.00 | 0.00 |
| ATOM<br>O | 3762 | OD1  | ASN | X | 247 | -17.328 | 7.061 | -27.534 | 1.00 | 0.00 |
| ATOM<br>N | 3763 | ND2  | ASN | X | 247 | -16.514 | 5.628 | -26.087 | 1.00 | 0.00 |
| ATOM<br>H | 3764 | HD21 | ASN | X | 247 | -15.726 | 5.516 | -26.692 | 1.00 | 0.00 |
| ATOM<br>H | 3765 | HD22 | ASN | X | 247 | -16.664 | 5.244 | -25.176 | 1.00 | 0.00 |
| ATOM<br>C | 3766 | C    | ASN | X | 247 | -20.712 | 6.607 | -27.097 | 1.00 | 0.00 |
| ATOM<br>O | 3767 | O    | ASN | X | 247 | -21.669 | 5.937 | -26.734 | 1.00 | 0.00 |
| ATOM<br>N | 3768 | N    | ARG | X | 248 | -20.246 | 6.648 | -28.366 | 1.00 | 0.00 |
| ATOM<br>H | 3769 | HN   | ARG | X | 248 | -19.449 | 7.208 | -28.578 | 1.00 | 0.00 |
| ATOM<br>C | 3770 | CA   | ARG | X | 248 | -20.849 | 5.745 | -29.398 | 1.00 | 0.00 |
| ATOM<br>H | 3771 | HA   | ARG | X | 248 | -21.013 | 4.817 | -28.870 | 1.00 | 0.00 |
| ATOM<br>C | 3772 | CB   | ARG | X | 248 | -22.167 | 6.204 | -30.086 | 1.00 | 0.00 |
| ATOM<br>H | 3773 | HB1  | ARG | X | 248 | -22.943 | 6.374 | -29.310 | 1.00 | 0.00 |
| ATOM<br>H | 3774 | HB2  | ARG | X | 248 | -22.579 | 5.426 | -30.764 | 1.00 | 0.00 |
| ATOM<br>C | 3775 | CG   | ARG | X | 248 | -22.086 | 7.524 | -30.756 | 1.00 | 0.00 |









|           |      |     |           |         |        |         |      |      |
|-----------|------|-----|-----------|---------|--------|---------|------|------|
| ATOM<br>C | 3851 | CD  | ILE X 251 | -19.815 | -1.621 | -34.556 | 1.00 | 0.00 |
| ATOM<br>H | 3852 | HD1 | ILE X 251 | -18.837 | -2.042 | -34.873 | 1.00 | 0.00 |
| ATOM<br>H | 3853 | HD2 | ILE X 251 | -20.591 | -2.311 | -34.952 | 1.00 | 0.00 |
| ATOM<br>H | 3854 | HD3 | ILE X 251 | -20.062 | -1.536 | -33.476 | 1.00 | 0.00 |
| ATOM<br>C | 3855 | C   | ILE X 251 | -20.913 | 0.579  | -38.992 | 1.00 | 0.00 |
| ATOM<br>O | 3856 | O   | ILE X 251 | -22.054 | 0.220  | -39.018 | 1.00 | 0.00 |
| ATOM<br>N | 3857 | N   | SER X 252 | -20.229 | 0.823  | -40.124 | 1.00 | 0.00 |
| ATOM<br>H | 3858 | HN  | SER X 252 | -19.346 | 1.286  | -40.124 | 1.00 | 0.00 |
| ATOM<br>C | 3859 | CA  | SER X 252 | -20.736 | 0.612  | -41.515 | 1.00 | 0.00 |
| ATOM<br>H | 3860 | HA  | SER X 252 | -21.789 | 0.826  | -41.400 | 1.00 | 0.00 |
| ATOM<br>C | 3861 | CB  | SER X 252 | -19.948 | 1.412  | -42.562 | 1.00 | 0.00 |
| ATOM<br>H | 3862 | HB1 | SER X 252 | -18.865 | 1.171  | -42.629 | 1.00 | 0.00 |
| ATOM<br>H | 3863 | HB2 | SER X 252 | -20.003 | 2.441  | -42.147 | 1.00 | 0.00 |
| ATOM<br>O | 3864 | OG  | SER X 252 | -20.509 | 1.381  | -43.838 | 1.00 | 0.00 |
| ATOM<br>H | 3865 | HG1 | SER X 252 | -21.420 | 1.668  | -43.742 | 1.00 | 0.00 |
| ATOM<br>C | 3866 | C   | SER X 252 | -20.703 | -0.817 | -41.998 | 1.00 | 0.00 |
| ATOM<br>O | 3867 | O   | SER X 252 | -19.678 | -1.508 | -41.922 | 1.00 | 0.00 |
| ATOM<br>N | 3868 | N   | ASN X 253 | -21.857 | -1.356 | -42.570 | 1.00 | 0.00 |
| ATOM<br>H | 3869 | HN  | ASN X 253 | -22.587 | -0.691 | -42.710 | 1.00 | 0.00 |
| ATOM<br>C | 3870 | CA  | ASN X 253 | -22.051 | -2.637 | -43.094 | 1.00 | 0.00 |
| ATOM<br>H | 3871 | HA  | ASN X 253 | -23.084 | -2.845 | -43.332 | 1.00 | 0.00 |
| ATOM<br>C | 3872 | CB  | ASN X 253 | -21.319 | -2.792 | -44.503 | 1.00 | 0.00 |
| ATOM<br>H | 3873 | HB1 | ASN X 253 | -21.573 | -3.803 | -44.887 | 1.00 | 0.00 |
| ATOM<br>H | 3874 | HB2 | ASN X 253 | -20.254 | -2.578 | -44.268 | 1.00 | 0.00 |
| ATOM<br>C | 3875 | CG  | ASN X 253 | -21.815 | -1.819 | -45.573 | 1.00 | 0.00 |

|           |      |      |     |   |     |         |         |         |      |      |
|-----------|------|------|-----|---|-----|---------|---------|---------|------|------|
| ATOM<br>O | 3876 | OD1  | ASN | X | 253 | -22.809 | -1.114  | -45.408 | 1.00 | 0.00 |
| ATOM<br>N | 3877 | ND2  | ASN | X | 253 | -21.132 | -1.969  | -46.732 | 1.00 | 0.00 |
| ATOM<br>H | 3878 | HD21 | ASN | X | 253 | -21.223 | -1.334  | -47.499 | 1.00 | 0.00 |
| ATOM<br>H | 3879 | HD22 | ASN | X | 253 | -20.412 | -2.647  | -46.591 | 1.00 | 0.00 |
| ATOM<br>C | 3880 | C    | ASN | X | 253 | -21.805 | -3.788  | -42.039 | 1.00 | 0.00 |
| ATOM<br>O | 3881 | O    | ASN | X | 253 | -20.709 | -4.342  | -41.923 | 1.00 | 0.00 |
| ATOM<br>N | 3882 | N    | CYS | X | 254 | -22.804 | -4.181  | -41.226 | 1.00 | 0.00 |
| ATOM<br>H | 3883 | HN   | CYS | X | 254 | -23.657 | -3.666  | -41.260 | 1.00 | 0.00 |
| ATOM<br>C | 3884 | CA   | CYS | X | 254 | -22.593 | -4.830  | -39.950 | 1.00 | 0.00 |
| ATOM<br>H | 3885 | HA   | CYS | X | 254 | -21.526 | -4.960  | -39.847 | 1.00 | 0.00 |
| ATOM<br>C | 3886 | CB   | CYS | X | 254 | -22.983 | -3.864  | -38.818 | 1.00 | 0.00 |
| ATOM<br>H | 3887 | HB1  | CYS | X | 254 | -24.031 | -3.528  | -38.974 | 1.00 | 0.00 |
| ATOM<br>H | 3888 | HB2  | CYS | X | 254 | -22.208 | -3.072  | -38.899 | 1.00 | 0.00 |
| ATOM<br>S | 3889 | SG   | CYS | X | 254 | -22.816 | -4.694  | -37.157 | 1.00 | 0.00 |
| ATOM<br>C | 3890 | C    | CYS | X | 254 | -23.388 | -6.134  | -39.951 | 1.00 | 0.00 |
| ATOM<br>O | 3891 | O    | CYS | X | 254 | -24.629 | -6.128  | -40.136 | 1.00 | 0.00 |
| ATOM<br>N | 3892 | N    | VAL | X | 255 | -22.708 | -7.250  | -39.633 | 1.00 | 0.00 |
| ATOM<br>H | 3893 | HN   | VAL | X | 255 | -21.722 | -7.136  | -39.538 | 1.00 | 0.00 |
| ATOM<br>C | 3894 | CA   | VAL | X | 255 | -23.198 | -8.594  | -39.267 | 1.00 | 0.00 |
| ATOM<br>H | 3895 | HA   | VAL | X | 255 | -24.261 | -8.746  | -39.387 | 1.00 | 0.00 |
| ATOM<br>C | 3896 | CB   | VAL | X | 255 | -22.530 | -9.697  | -40.175 | 1.00 | 0.00 |
| ATOM<br>H | 3897 | HB   | VAL | X | 255 | -21.439 | -9.495  | -40.126 | 1.00 | 0.00 |
| ATOM<br>C | 3898 | CG1  | VAL | X | 255 | -22.962 | -11.112 | -39.741 | 1.00 | 0.00 |
| ATOM<br>H | 3899 | HG11 | VAL | X | 255 | -22.520 | -11.873 | -40.419 | 1.00 | 0.00 |
| ATOM<br>H | 3900 | HG12 | VAL | X | 255 | -24.061 | -11.135 | -39.576 | 1.00 | 0.00 |



|           |      |     |     |   |     |         |         |         |      |      |
|-----------|------|-----|-----|---|-----|---------|---------|---------|------|------|
| ATOM<br>O | 3926 | OD1 | ASP | X | 257 | -19.967 | -14.040 | -31.422 | 1.00 | 0.00 |
| ATOM<br>O | 3927 | OD2 | ASP | X | 257 | -22.133 | -14.569 | -31.526 | 1.00 | 0.00 |
| ATOM<br>C | 3928 | C   | ASP | X | 257 | -23.464 | -11.936 | -31.558 | 1.00 | 0.00 |
| ATOM<br>O | 3929 | O   | ASP | X | 257 | -23.004 | -11.426 | -30.552 | 1.00 | 0.00 |
| ATOM<br>N | 3930 | N   | TYR | X | 258 | -24.690 | -12.450 | -31.483 | 1.00 | 0.00 |
| ATOM<br>H | 3931 | HN  | TYR | X | 258 | -25.301 | -12.844 | -32.165 | 1.00 | 0.00 |
| ATOM<br>C | 3932 | CA  | TYR | X | 258 | -25.417 | -12.412 | -30.298 | 1.00 | 0.00 |
| ATOM<br>H | 3933 | HA  | TYR | X | 258 | -24.979 | -11.787 | -29.535 | 1.00 | 0.00 |
| ATOM<br>C | 3934 | CB  | TYR | X | 258 | -26.883 | -11.962 | -30.480 | 1.00 | 0.00 |
| ATOM<br>H | 3935 | HB1 | TYR | X | 258 | -27.422 | -11.905 | -29.511 | 1.00 | 0.00 |
| ATOM<br>H | 3936 | HB2 | TYR | X | 258 | -27.471 | -12.712 | -31.051 | 1.00 | 0.00 |
| ATOM<br>C | 3937 | CG  | TYR | X | 258 | -26.967 | -10.737 | -31.220 | 1.00 | 0.00 |
| ATOM<br>C | 3938 | CD1 | TYR | X | 258 | -26.903 | -10.680 | -32.587 | 1.00 | 0.00 |
| ATOM<br>H | 3939 | HD1 | TYR | X | 258 | -26.784 | -11.523 | -33.251 | 1.00 | 0.00 |
| ATOM<br>C | 3940 | CE1 | TYR | X | 258 | -27.138 | -9.463  | -33.350 | 1.00 | 0.00 |
| ATOM<br>H | 3941 | HE1 | TYR | X | 258 | -26.883 | -9.315  | -34.389 | 1.00 | 0.00 |
| ATOM<br>C | 3942 | CZ  | TYR | X | 258 | -27.282 | -8.264  | -32.579 | 1.00 | 0.00 |
| ATOM<br>O | 3943 | OH  | TYR | X | 258 | -27.204 | -6.988  | -33.271 | 1.00 | 0.00 |
| ATOM<br>H | 3944 | HH  | TYR | X | 258 | -27.297 | -7.161  | -34.211 | 1.00 | 0.00 |
| ATOM<br>C | 3945 | CD2 | TYR | X | 258 | -27.190 | -9.566  | -30.501 | 1.00 | 0.00 |
| ATOM<br>H | 3946 | HD2 | TYR | X | 258 | -27.276 | -9.551  | -29.424 | 1.00 | 0.00 |
| ATOM<br>C | 3947 | CE2 | TYR | X | 258 | -27.312 | -8.317  | -31.206 | 1.00 | 0.00 |
| ATOM<br>H | 3948 | HE2 | TYR | X | 258 | -27.441 | -7.420  | -30.618 | 1.00 | 0.00 |
| ATOM<br>C | 3949 | C   | TYR | X | 258 | -25.467 | -13.765 | -29.484 | 1.00 | 0.00 |
| ATOM<br>O | 3950 | O   | TYR | X | 258 | -26.227 | -13.926 | -28.553 | 1.00 | 0.00 |

|           |      |      |           |         |         |         |      |      |
|-----------|------|------|-----------|---------|---------|---------|------|------|
| ATOM<br>N | 3951 | N    | SER X 259 | -24.581 | -14.751 | -29.747 | 1.00 | 0.00 |
| ATOM<br>H | 3952 | HN   | SER X 259 | -23.929 | -14.580 | -30.482 | 1.00 | 0.00 |
| ATOM<br>C | 3953 | CA   | SER X 259 | -24.477 | -15.959 | -28.934 | 1.00 | 0.00 |
| ATOM<br>H | 3954 | HA   | SER X 259 | -25.416 | -16.486 | -29.023 | 1.00 | 0.00 |
| ATOM<br>C | 3955 | CB   | SER X 259 | -23.303 | -16.968 | -29.474 | 1.00 | 0.00 |
| ATOM<br>H | 3956 | HB1  | SER X 259 | -23.476 | -17.068 | -30.567 | 1.00 | 0.00 |
| ATOM<br>H | 3957 | HB2  | SER X 259 | -23.329 | -17.973 | -29.002 | 1.00 | 0.00 |
| ATOM<br>O | 3958 | OG   | SER X 259 | -21.967 | -16.426 | -29.414 | 1.00 | 0.00 |
| ATOM<br>H | 3959 | HG1  | SER X 259 | -22.117 | -15.700 | -30.024 | 1.00 | 0.00 |
| ATOM<br>C | 3960 | C    | SER X 259 | -24.154 | -15.687 | -27.377 | 1.00 | 0.00 |
| ATOM<br>O | 3961 | O    | SER X 259 | -24.781 | -16.197 | -26.468 | 1.00 | 0.00 |
| ATOM<br>N | 3962 | N    | VAL X 260 | -23.129 | -14.894 | -27.042 | 1.00 | 0.00 |
| ATOM<br>H | 3963 | HN   | VAL X 260 | -22.457 | -14.630 | -27.730 | 1.00 | 0.00 |
| ATOM<br>C | 3964 | CA   | VAL X 260 | -22.984 | -14.552 | -25.688 | 1.00 | 0.00 |
| ATOM<br>H | 3965 | HA   | VAL X 260 | -23.025 | -15.436 | -25.068 | 1.00 | 0.00 |
| ATOM<br>C | 3966 | CB   | VAL X 260 | -21.659 | -13.794 | -25.443 | 1.00 | 0.00 |
| ATOM<br>H | 3967 | HB   | VAL X 260 | -21.646 | -12.695 | -25.606 | 1.00 | 0.00 |
| ATOM<br>C | 3968 | CG1  | VAL X 260 | -21.299 | -13.895 | -23.957 | 1.00 | 0.00 |
| ATOM<br>H | 3969 | HG11 | VAL X 260 | -21.275 | -14.978 | -23.706 | 1.00 | 0.00 |
| ATOM<br>H | 3970 | HG12 | VAL X 260 | -22.158 | -13.413 | -23.443 | 1.00 | 0.00 |
| ATOM<br>H | 3971 | HG13 | VAL X 260 | -20.355 | -13.358 | -23.724 | 1.00 | 0.00 |
| ATOM<br>C | 3972 | CG2  | VAL X 260 | -20.487 | -14.311 | -26.385 | 1.00 | 0.00 |
| ATOM<br>H | 3973 | HG21 | VAL X 260 | -20.571 | -15.375 | -26.694 | 1.00 | 0.00 |
| ATOM<br>H | 3974 | HG22 | VAL X 260 | -19.492 | -14.088 | -25.945 | 1.00 | 0.00 |
| ATOM<br>H | 3975 | HG23 | VAL X 260 | -20.694 | -13.764 | -27.330 | 1.00 | 0.00 |

|           |      |      |           |         |         |         |      |      |
|-----------|------|------|-----------|---------|---------|---------|------|------|
| ATOM<br>C | 3976 | C    | VAL X 260 | -24.140 | -13.602 | -25.240 | 1.00 | 0.00 |
| ATOM<br>O | 3977 | O    | VAL X 260 | -24.552 | -13.615 | -24.060 | 1.00 | 0.00 |
| ATOM<br>N | 3978 | N    | LEU X 261 | -24.690 | -12.682 | -26.006 | 1.00 | 0.00 |
| ATOM<br>H | 3979 | HN   | LEU X 261 | -24.250 | -12.562 | -26.893 | 1.00 | 0.00 |
| ATOM<br>C | 3980 | CA   | LEU X 261 | -25.688 | -11.666 | -25.710 | 1.00 | 0.00 |
| ATOM<br>H | 3981 | HA   | LEU X 261 | -25.375 | -11.158 | -24.810 | 1.00 | 0.00 |
| ATOM<br>C | 3982 | CB   | LEU X 261 | -25.771 | -10.615 | -26.859 | 1.00 | 0.00 |
| ATOM<br>H | 3983 | HB1  | LEU X 261 | -26.342 | -9.782  | -26.397 | 1.00 | 0.00 |
| ATOM<br>H | 3984 | HB2  | LEU X 261 | -26.288 | -11.105 | -27.712 | 1.00 | 0.00 |
| ATOM<br>C | 3985 | CG   | LEU X 261 | -24.387 | -10.045 | -27.173 | 1.00 | 0.00 |
| ATOM<br>H | 3986 | HG   | LEU X 261 | -23.727 | -10.845 | -27.570 | 1.00 | 0.00 |
| ATOM<br>C | 3987 | CD1  | LEU X 261 | -24.538 | -8.979  | -28.334 | 1.00 | 0.00 |
| ATOM<br>H | 3988 | HD11 | LEU X 261 | -23.545 | -8.499  | -28.471 | 1.00 | 0.00 |
| ATOM<br>H | 3989 | HD12 | LEU X 261 | -25.221 | -8.174  | -27.987 | 1.00 | 0.00 |
| ATOM<br>H | 3990 | HD13 | LEU X 261 | -24.879 | -9.441  | -29.285 | 1.00 | 0.00 |
| ATOM<br>C | 3991 | CD2  | LEU X 261 | -23.794 | -9.296  | -25.967 | 1.00 | 0.00 |
| ATOM<br>H | 3992 | HD21 | LEU X 261 | -24.545 | -8.701  | -25.404 | 1.00 | 0.00 |
| ATOM<br>H | 3993 | HD22 | LEU X 261 | -22.918 | -8.704  | -26.308 | 1.00 | 0.00 |
| ATOM<br>H | 3994 | HD23 | LEU X 261 | -23.457 | -10.085 | -25.261 | 1.00 | 0.00 |
| ATOM<br>C | 3995 | C    | LEU X 261 | -27.017 | -12.121 | -25.396 | 1.00 | 0.00 |
| ATOM<br>O | 3996 | O    | LEU X 261 | -27.756 | -11.568 | -24.542 | 1.00 | 0.00 |
| ATOM<br>N | 3997 | N    | TYR X 262 | -27.330 | -13.251 | -25.981 | 1.00 | 0.00 |
| ATOM<br>H | 3998 | HN   | TYR X 262 | -26.816 | -13.530 | -26.788 | 1.00 | 0.00 |
| ATOM<br>C | 3999 | CA   | TYR X 262 | -28.465 | -14.179 | -25.548 | 1.00 | 0.00 |
| ATOM<br>H | 4000 | HA   | TYR X 262 | -29.316 | -13.525 | -25.428 | 1.00 | 0.00 |





|           |      |      |           |         |         |         |      |      |
|-----------|------|------|-----------|---------|---------|---------|------|------|
| ATOM<br>O | 4026 | OD1  | ASN X 263 | -25.558 | -16.244 | -19.686 | 1.00 | 0.00 |
| ATOM<br>N | 4027 | ND2  | ASN X 263 | -24.078 | -17.523 | -20.741 | 1.00 | 0.00 |
| ATOM<br>H | 4028 | HD21 | ASN X 263 | -23.842 | -18.053 | -19.927 | 1.00 | 0.00 |
| ATOM<br>H | 4029 | HD22 | ASN X 263 | -23.589 | -17.753 | -21.581 | 1.00 | 0.00 |
| ATOM<br>C | 4030 | C    | ASN X 263 | -27.624 | -14.715 | -21.093 | 1.00 | 0.00 |
| ATOM<br>O | 4031 | O    | ASN X 263 | -27.575 | -13.480 | -21.035 | 1.00 | 0.00 |
| ATOM<br>N | 4032 | N    | SER X 264 | -28.321 | -15.285 | -20.138 | 1.00 | 0.00 |
| ATOM<br>H | 4033 | HN   | SER X 264 | -28.449 | -16.274 | -20.116 | 1.00 | 0.00 |
| ATOM<br>C | 4034 | CA   | SER X 264 | -29.120 | -14.504 | -19.248 | 1.00 | 0.00 |
| ATOM<br>H | 4035 | HA   | SER X 264 | -29.387 | -13.495 | -19.528 | 1.00 | 0.00 |
| ATOM<br>C | 4036 | CB   | SER X 264 | -30.506 | -15.107 | -19.189 | 1.00 | 0.00 |
| ATOM<br>H | 4037 | HB1  | SER X 264 | -30.988 | -15.129 | -20.190 | 1.00 | 0.00 |
| ATOM<br>H | 4038 | HB2  | SER X 264 | -31.259 | -14.584 | -18.561 | 1.00 | 0.00 |
| ATOM<br>O | 4039 | OG   | SER X 264 | -30.403 | -16.434 | -18.622 | 1.00 | 0.00 |
| ATOM<br>H | 4040 | HG1  | SER X 264 | -30.303 | -17.111 | -19.295 | 1.00 | 0.00 |
| ATOM<br>C | 4041 | C    | SER X 264 | -28.531 | -14.512 | -17.927 | 1.00 | 0.00 |
| ATOM<br>O | 4042 | O    | SER X 264 | -29.017 | -13.770 | -16.945 | 1.00 | 0.00 |
| ATOM<br>N | 4043 | N    | ALA X 265 | -27.357 | -15.160 | -17.749 | 1.00 | 0.00 |
| ATOM<br>H | 4044 | HN   | ALA X 265 | -26.874 | -15.570 | -18.519 | 1.00 | 0.00 |
| ATOM<br>C | 4045 | CA   | ALA X 265 | -26.658 | -14.984 | -16.537 | 1.00 | 0.00 |
| ATOM<br>H | 4046 | HA   | ALA X 265 | -27.322 | -14.706 | -15.732 | 1.00 | 0.00 |
| ATOM<br>C | 4047 | CB   | ALA X 265 | -25.921 | -16.320 | -16.256 | 1.00 | 0.00 |
| ATOM<br>H | 4048 | HB1  | ALA X 265 | -26.627 | -17.173 | -16.160 | 1.00 | 0.00 |
| ATOM<br>H | 4049 | HB2  | ALA X 265 | -25.399 | -16.183 | -15.285 | 1.00 | 0.00 |
| ATOM<br>H | 4050 | HB3  | ALA X 265 | -25.176 | -16.527 | -17.053 | 1.00 | 0.00 |

|           |      |     |           |         |         |         |      |      |
|-----------|------|-----|-----------|---------|---------|---------|------|------|
| ATOM<br>C | 4051 | C   | ALA X 265 | -25.629 | -13.828 | -16.836 | 1.00 | 0.00 |
| ATOM<br>O | 4052 | O   | ALA X 265 | -25.543 | -12.874 | -16.052 | 1.00 | 0.00 |
| ATOM<br>N | 4053 | N   | SER X 266 | -24.882 | -13.785 | -17.943 | 1.00 | 0.00 |
| ATOM<br>H | 4054 | HN  | SER X 266 | -24.972 | -14.637 | -18.453 | 1.00 | 0.00 |
| ATOM<br>C | 4055 | CA  | SER X 266 | -24.070 | -12.747 | -18.459 | 1.00 | 0.00 |
| ATOM<br>H | 4056 | HA  | SER X 266 | -23.358 | -12.562 | -17.668 | 1.00 | 0.00 |
| ATOM<br>C | 4057 | CB  | SER X 266 | -23.299 | -13.024 | -19.792 | 1.00 | 0.00 |
| ATOM<br>H | 4058 | HB1 | SER X 266 | -22.914 | -12.060 | -20.189 | 1.00 | 0.00 |
| ATOM<br>H | 4059 | HB2 | SER X 266 | -24.012 | -13.363 | -20.573 | 1.00 | 0.00 |
| ATOM<br>O | 4060 | OG  | SER X 266 | -22.217 | -13.848 | -19.589 | 1.00 | 0.00 |
| ATOM<br>H | 4061 | HG1 | SER X 266 | -22.386 | -14.435 | -18.849 | 1.00 | 0.00 |
| ATOM<br>C | 4062 | C   | SER X 266 | -24.864 | -11.497 | -18.604 | 1.00 | 0.00 |
| ATOM<br>O | 4063 | O   | SER X 266 | -24.385 | -10.458 | -18.208 | 1.00 | 0.00 |
| ATOM<br>N | 4064 | N   | PHE X 267 | -26.062 | -11.515 | -19.138 | 1.00 | 0.00 |
| ATOM<br>H | 4065 | HN  | PHE X 267 | -26.497 | -12.347 | -19.473 | 1.00 | 0.00 |
| ATOM<br>C | 4066 | CA  | PHE X 267 | -26.855 | -10.345 | -19.392 | 1.00 | 0.00 |
| ATOM<br>H | 4067 | HA  | PHE X 267 | -26.390 | -9.433  | -19.047 | 1.00 | 0.00 |
| ATOM<br>C | 4068 | CB  | PHE X 267 | -27.057 | -10.075 | -20.895 | 1.00 | 0.00 |
| ATOM<br>H | 4069 | HB1 | PHE X 267 | -27.552 | -9.085  | -20.988 | 1.00 | 0.00 |
| ATOM<br>H | 4070 | HB2 | PHE X 267 | -27.575 | -10.865 | -21.480 | 1.00 | 0.00 |
| ATOM<br>C | 4071 | CG  | PHE X 267 | -25.661 | -9.814  | -21.533 | 1.00 | 0.00 |
| ATOM<br>C | 4072 | CD1 | PHE X 267 | -24.944 | -8.709  | -21.178 | 1.00 | 0.00 |
| ATOM<br>H | 4073 | HD1 | PHE X 267 | -25.510 | -8.070  | -20.516 | 1.00 | 0.00 |
| ATOM<br>C | 4074 | CE1 | PHE X 267 | -23.686 | -8.486  | -21.629 | 1.00 | 0.00 |
| ATOM<br>H | 4075 | HE1 | PHE X 267 | -23.073 | -7.677  | -21.259 | 1.00 | 0.00 |















|           |      |      |     |   |     |         |         |         |      |      |
|-----------|------|------|-----|---|-----|---------|---------|---------|------|------|
| ATOM<br>H | 4226 | HG1  | PRO | X | 277 | -36.571 | -11.762 | -29.557 | 1.00 | 0.00 |
| ATOM<br>H | 4227 | HG2  | PRO | X | 277 | -36.758 | -10.482 | -28.170 | 1.00 | 0.00 |
| ATOM<br>C | 4228 | C    | PRO | X | 277 | -34.332 | -11.379 | -31.705 | 1.00 | 0.00 |
| ATOM<br>O | 4229 | O    | PRO | X | 277 | -33.157 | -11.711 | -31.593 | 1.00 | 0.00 |
| ATOM<br>N | 4230 | N    | THR | X | 278 | -35.272 | -12.157 | -32.382 | 1.00 | 0.00 |
| ATOM<br>H | 4231 | HN   | THR | X | 278 | -36.245 | -11.941 | -32.405 | 1.00 | 0.00 |
| ATOM<br>C | 4232 | CA   | THR | X | 278 | -34.919 | -13.313 | -33.118 | 1.00 | 0.00 |
| ATOM<br>H | 4233 | HA   | THR | X | 278 | -34.172 | -13.838 | -32.541 | 1.00 | 0.00 |
| ATOM<br>C | 4234 | CB   | THR | X | 278 | -36.005 | -14.331 | -33.355 | 1.00 | 0.00 |
| ATOM<br>H | 4235 | HB   | THR | X | 278 | -35.624 | -15.318 | -33.693 | 1.00 | 0.00 |
| ATOM<br>O | 4236 | OG1  | THR | X | 278 | -36.981 | -13.982 | -34.325 | 1.00 | 0.00 |
| ATOM<br>H | 4237 | HG1  | THR | X | 278 | -37.441 | -13.195 | -34.024 | 1.00 | 0.00 |
| ATOM<br>C | 4238 | CG2  | THR | X | 278 | -36.777 | -14.561 | -32.057 | 1.00 | 0.00 |
| ATOM<br>H | 4239 | HG21 | THR | X | 278 | -36.097 | -14.963 | -31.277 | 1.00 | 0.00 |
| ATOM<br>H | 4240 | HG22 | THR | X | 278 | -37.536 | -15.367 | -32.155 | 1.00 | 0.00 |
| ATOM<br>H | 4241 | HG23 | THR | X | 278 | -37.201 | -13.723 | -31.463 | 1.00 | 0.00 |
| ATOM<br>C | 4242 | C    | THR | X | 278 | -34.184 | -13.043 | -34.396 | 1.00 | 0.00 |
| ATOM<br>O | 4243 | O    | THR | X | 278 | -34.141 | -11.913 | -34.915 | 1.00 | 0.00 |
| ATOM<br>N | 4244 | N    | LYS | X | 279 | -33.381 | -14.020 | -34.936 | 1.00 | 0.00 |
| ATOM<br>H | 4245 | HN   | LYS | X | 279 | -33.113 | -14.915 | -34.588 | 1.00 | 0.00 |
| ATOM<br>C | 4246 | CA   | LYS | X | 279 | -32.737 | -13.887 | -36.201 | 1.00 | 0.00 |
| ATOM<br>H | 4247 | HA   | LYS | X | 279 | -32.076 | -14.741 | -36.227 | 1.00 | 0.00 |
| ATOM<br>C | 4248 | CB   | LYS | X | 279 | -33.753 | -13.964 | -37.372 | 1.00 | 0.00 |
| ATOM<br>H | 4249 | HB1  | LYS | X | 279 | -33.187 | -13.966 | -38.328 | 1.00 | 0.00 |
| ATOM<br>H | 4250 | HB2  | LYS | X | 279 | -34.330 | -13.015 | -37.344 | 1.00 | 0.00 |





|           |      |      |           |         |         |         |      |      |
|-----------|------|------|-----------|---------|---------|---------|------|------|
| ATOM<br>C | 4301 | CA   | ASP X 282 | -28.791 | -13.870 | -40.123 | 1.00 | 0.00 |
| ATOM<br>H | 4302 | HA   | ASP X 282 | -28.182 | -14.599 | -40.636 | 1.00 | 0.00 |
| ATOM<br>C | 4303 | CB   | ASP X 282 | -30.214 | -14.505 | -40.245 | 1.00 | 0.00 |
| ATOM<br>H | 4304 | HB1  | ASP X 282 | -30.645 | -14.615 | -41.262 | 1.00 | 0.00 |
| ATOM<br>H | 4305 | HB2  | ASP X 282 | -30.875 | -13.674 | -39.917 | 1.00 | 0.00 |
| ATOM<br>C | 4306 | CG   | ASP X 282 | -30.388 | -15.791 | -39.482 | 1.00 | 0.00 |
| ATOM<br>O | 4307 | OD1  | ASP X 282 | -31.580 | -16.136 | -39.210 | 1.00 | 0.00 |
| ATOM<br>O | 4308 | OD2  | ASP X 282 | -29.446 | -16.491 | -39.133 | 1.00 | 0.00 |
| ATOM<br>C | 4309 | C    | ASP X 282 | -28.785 | -12.607 | -40.966 | 1.00 | 0.00 |
| ATOM<br>O | 4310 | O    | ASP X 282 | -28.559 | -12.580 | -42.153 | 1.00 | 0.00 |
| ATOM<br>N | 4311 | N    | LEU X 283 | -29.046 | -11.466 | -40.277 | 1.00 | 0.00 |
| ATOM<br>H | 4312 | HN   | LEU X 283 | -29.208 | -11.636 | -39.308 | 1.00 | 0.00 |
| ATOM<br>C | 4313 | CA   | LEU X 283 | -29.322 | -10.249 | -41.044 | 1.00 | 0.00 |
| ATOM<br>H | 4314 | HA   | LEU X 283 | -29.708 | -10.455 | -42.031 | 1.00 | 0.00 |
| ATOM<br>C | 4315 | CB   | LEU X 283 | -30.502 | -9.620  | -40.328 | 1.00 | 0.00 |
| ATOM<br>H | 4316 | HB1  | LEU X 283 | -30.737 | -8.724  | -40.941 | 1.00 | 0.00 |
| ATOM<br>H | 4317 | HB2  | LEU X 283 | -30.288 | -9.413  | -39.258 | 1.00 | 0.00 |
| ATOM<br>C | 4318 | CG   | LEU X 283 | -31.830 | -10.383 | -40.362 | 1.00 | 0.00 |
| ATOM<br>H | 4319 | HG   | LEU X 283 | -31.777 | -11.385 | -39.885 | 1.00 | 0.00 |
| ATOM<br>C | 4320 | CD1  | LEU X 283 | -32.835 | -9.536  | -39.540 | 1.00 | 0.00 |
| ATOM<br>H | 4321 | HD11 | LEU X 283 | -32.964 | -8.503  | -39.926 | 1.00 | 0.00 |
| ATOM<br>H | 4322 | HD12 | LEU X 283 | -32.391 | -9.455  | -38.525 | 1.00 | 0.00 |
| ATOM<br>H | 4323 | HD13 | LEU X 283 | -33.770 | -10.110 | -39.362 | 1.00 | 0.00 |
| ATOM<br>C | 4324 | CD2  | LEU X 283 | -32.419 | -10.637 | -41.732 | 1.00 | 0.00 |
| ATOM<br>H | 4325 | HD21 | LEU X 283 | -32.592 | -9.660  | -42.233 | 1.00 | 0.00 |

|           |      |      |     |   |     |         |         |         |      |      |
|-----------|------|------|-----|---|-----|---------|---------|---------|------|------|
| ATOM<br>H | 4326 | HD22 | LEU | X | 283 | -33.397 | -11.160 | -41.661 | 1.00 | 0.00 |
| ATOM<br>H | 4327 | HD23 | LEU | X | 283 | -31.732 | -11.037 | -42.507 | 1.00 | 0.00 |
| ATOM<br>C | 4328 | C    | LEU | X | 283 | -28.083 | -9.342  | -41.260 | 1.00 | 0.00 |
| ATOM<br>O | 4329 | O    | LEU | X | 283 | -27.092 | -9.398  | -40.569 | 1.00 | 0.00 |
| ATOM<br>N | 4330 | N    | CYS | X | 284 | -28.166 | -8.448  | -42.354 | 1.00 | 0.00 |
| ATOM<br>H | 4331 | HN   | CYS | X | 284 | -29.040 | -8.348  | -42.824 | 1.00 | 0.00 |
| ATOM<br>C | 4332 | CA   | CYS | X | 284 | -27.170 | -7.491  | -42.592 | 1.00 | 0.00 |
| ATOM<br>H | 4333 | HA   | CYS | X | 284 | -26.411 | -7.699  | -41.852 | 1.00 | 0.00 |
| ATOM<br>C | 4334 | CB   | CYS | X | 284 | -26.636 | -7.899  | -44.017 | 1.00 | 0.00 |
| ATOM<br>H | 4335 | HB1  | CYS | X | 284 | -27.431 | -7.789  | -44.785 | 1.00 | 0.00 |
| ATOM<br>H | 4336 | HB2  | CYS | X | 284 | -26.281 | -8.948  | -43.922 | 1.00 | 0.00 |
| ATOM<br>S | 4337 | SG   | CYS | X | 284 | -25.352 | -6.787  | -44.620 | 1.00 | 0.00 |
| ATOM<br>H | 4338 | HG1  | CYS | X | 284 | -26.198 | -6.008  | -45.279 | 1.00 | 0.00 |
| ATOM<br>C | 4339 | C    | CYS | X | 284 | -27.701 | -6.092  | -42.569 | 1.00 | 0.00 |
| ATOM<br>O | 4340 | O    | CYS | X | 284 | -28.676 | -5.777  | -43.213 | 1.00 | 0.00 |
| ATOM<br>N | 4341 | N    | PHE | X | 285 | -27.028 | -5.188  | -41.757 | 1.00 | 0.00 |
| ATOM<br>H | 4342 | HN   | PHE | X | 285 | -26.197 | -5.533  | -41.328 | 1.00 | 0.00 |
| ATOM<br>C | 4343 | CA   | PHE | X | 285 | -27.561 | -3.836  | -41.482 | 1.00 | 0.00 |
| ATOM<br>H | 4344 | HA   | PHE | X | 285 | -28.527 | -3.801  | -41.964 | 1.00 | 0.00 |
| ATOM<br>C | 4345 | CB   | PHE | X | 285 | -27.658 | -3.674  | -39.919 | 1.00 | 0.00 |
| ATOM<br>H | 4346 | HB1  | PHE | X | 285 | -27.950 | -2.623  | -39.709 | 1.00 | 0.00 |
| ATOM<br>H | 4347 | HB2  | PHE | X | 285 | -26.714 | -3.959  | -39.407 | 1.00 | 0.00 |
| ATOM<br>C | 4348 | CG   | PHE | X | 285 | -28.706 | -4.580  | -39.318 | 1.00 | 0.00 |
| ATOM<br>C | 4349 | CD1  | PHE | X | 285 | -30.029 | -4.329  | -39.543 | 1.00 | 0.00 |
| ATOM<br>H | 4350 | HD1  | PHE | X | 285 | -30.298 | -3.441  | -40.096 | 1.00 | 0.00 |



|           |      |      |           |         |        |         |      |      |
|-----------|------|------|-----------|---------|--------|---------|------|------|
| ATOM<br>H | 4376 | HN   | ASN X 287 | -26.732 | 0.396  | -41.205 | 1.00 | 0.00 |
| ATOM<br>C | 4377 | CA   | ASN X 287 | -24.860 | 0.968  | -40.329 | 1.00 | 0.00 |
| ATOM<br>H | 4378 | HA   | ASN X 287 | -23.869 | 0.543  | -40.271 | 1.00 | 0.00 |
| ATOM<br>C | 4379 | CB   | ASN X 287 | -24.609 | 2.545  | -40.454 | 1.00 | 0.00 |
| ATOM<br>H | 4380 | HB1  | ASN X 287 | -23.868 | 2.901  | -39.707 | 1.00 | 0.00 |
| ATOM<br>H | 4381 | HB2  | ASN X 287 | -25.501 | 3.164  | -40.221 | 1.00 | 0.00 |
| ATOM<br>C | 4382 | CG   | ASN X 287 | -23.935 | 2.997  | -41.765 | 1.00 | 0.00 |
| ATOM<br>O | 4383 | OD1  | ASN X 287 | -22.807 | 2.791  | -42.199 | 1.00 | 0.00 |
| ATOM<br>N | 4384 | ND2  | ASN X 287 | -24.822 | 3.774  | -42.546 | 1.00 | 0.00 |
| ATOM<br>H | 4385 | HD21 | ASN X 287 | -24.640 | 4.119  | -43.467 | 1.00 | 0.00 |
| ATOM<br>H | 4386 | HD22 | ASN X 287 | -25.644 | 4.167  | -42.134 | 1.00 | 0.00 |
| ATOM<br>C | 4387 | C    | ASN X 287 | -25.482 | 0.606  | -39.002 | 1.00 | 0.00 |
| ATOM<br>O | 4388 | O    | ASN X 287 | -26.663 | 0.881  | -38.652 | 1.00 | 0.00 |
| ATOM<br>N | 4389 | N    | VAL X 288 | -24.607 | 0.177  | -38.069 | 1.00 | 0.00 |
| ATOM<br>H | 4390 | HN   | VAL X 288 | -23.647 | 0.026  | -38.292 | 1.00 | 0.00 |
| ATOM<br>C | 4391 | CA   | VAL X 288 | -25.108 | -0.096 | -36.719 | 1.00 | 0.00 |
| ATOM<br>H | 4392 | HA   | VAL X 288 | -26.139 | 0.195  | -36.581 | 1.00 | 0.00 |
| ATOM<br>C | 4393 | CB   | VAL X 288 | -25.014 | -1.621 | -36.317 | 1.00 | 0.00 |
| ATOM<br>H | 4394 | HB   | VAL X 288 | -24.015 | -2.033 | -36.575 | 1.00 | 0.00 |
| ATOM<br>C | 4395 | CG1  | VAL X 288 | -25.397 | -1.877 | -34.897 | 1.00 | 0.00 |
| ATOM<br>H | 4396 | HG11 | VAL X 288 | -26.397 | -1.466 | -34.646 | 1.00 | 0.00 |
| ATOM<br>H | 4397 | HG12 | VAL X 288 | -24.649 | -1.344 | -34.271 | 1.00 | 0.00 |
| ATOM<br>H | 4398 | HG13 | VAL X 288 | -25.363 | -2.928 | -34.538 | 1.00 | 0.00 |
| ATOM<br>C | 4399 | CG2  | VAL X 288 | -26.032 | -2.381 | -37.140 | 1.00 | 0.00 |
| ATOM<br>H | 4400 | HG21 | VAL X 288 | -27.021 | -1.883 | -37.046 | 1.00 | 0.00 |







|           |      |     |           |         |       |         |      |      |
|-----------|------|-----|-----------|---------|-------|---------|------|------|
| ATOM<br>H | 4451 | HA  | SER X 292 | -23.132 | 2.068 | -24.030 | 1.00 | 0.00 |
| ATOM<br>C | 4452 | CB  | SER X 292 | -20.974 | 1.726 | -24.447 | 1.00 | 0.00 |
| ATOM<br>H | 4453 | HB1 | SER X 292 | -21.185 | 0.756 | -24.946 | 1.00 | 0.00 |
| ATOM<br>H | 4454 | HB2 | SER X 292 | -20.876 | 1.545 | -23.355 | 1.00 | 0.00 |
| ATOM<br>O | 4455 | OG  | SER X 292 | -19.723 | 2.313 | -24.879 | 1.00 | 0.00 |
| ATOM<br>H | 4456 | HG1 | SER X 292 | -19.747 | 2.422 | -25.832 | 1.00 | 0.00 |
| ATOM<br>C | 4457 | C   | SER X 292 | -22.201 | 3.571 | -23.121 | 1.00 | 0.00 |
| ATOM<br>O | 4458 | O   | SER X 292 | -21.574 | 4.613 | -23.155 | 1.00 | 0.00 |
| ATOM<br>N | 4459 | N   | PHE X 293 | -22.943 | 3.170 | -22.000 | 1.00 | 0.00 |
| ATOM<br>H | 4460 | HN  | PHE X 293 | -23.526 | 2.364 | -22.071 | 1.00 | 0.00 |
| ATOM<br>C | 4461 | CA  | PHE X 293 | -22.975 | 3.996 | -20.774 | 1.00 | 0.00 |
| ATOM<br>H | 4462 | HA  | PHE X 293 | -21.947 | 4.314 | -20.681 | 1.00 | 0.00 |
| ATOM<br>C | 4463 | CB  | PHE X 293 | -23.921 | 5.293 | -20.984 | 1.00 | 0.00 |
| ATOM<br>H | 4464 | HB1 | PHE X 293 | -23.441 | 5.917 | -21.768 | 1.00 | 0.00 |
| ATOM<br>H | 4465 | HB2 | PHE X 293 | -23.971 | 5.781 | -19.988 | 1.00 | 0.00 |
| ATOM<br>C | 4466 | CG  | PHE X 293 | -25.293 | 4.963 | -21.372 | 1.00 | 0.00 |
| ATOM<br>C | 4467 | CD1 | PHE X 293 | -26.330 | 4.583 | -20.395 | 1.00 | 0.00 |
| ATOM<br>H | 4468 | HD1 | PHE X 293 | -26.040 | 4.499 | -19.358 | 1.00 | 0.00 |
| ATOM<br>C | 4469 | CE1 | PHE X 293 | -27.651 | 4.460 | -20.841 | 1.00 | 0.00 |
| ATOM<br>H | 4470 | HE1 | PHE X 293 | -28.492 | 4.227 | -20.205 | 1.00 | 0.00 |
| ATOM<br>C | 4471 | CZ  | PHE X 293 | -27.893 | 4.586 | -22.193 | 1.00 | 0.00 |
| ATOM<br>H | 4472 | HZ  | PHE X 293 | -28.910 | 4.604 | -22.554 | 1.00 | 0.00 |
| ATOM<br>C | 4473 | CD2 | PHE X 293 | -25.618 | 4.981 | -22.733 | 1.00 | 0.00 |
| ATOM<br>H | 4474 | HD2 | PHE X 293 | -24.889 | 5.111 | -23.519 | 1.00 | 0.00 |
| ATOM<br>C | 4475 | CE2 | PHE X 293 | -26.946 | 4.879 | -23.130 | 1.00 | 0.00 |













|           |      |      |     |   |     |         |        |         |      |      |
|-----------|------|------|-----|---|-----|---------|--------|---------|------|------|
| ATOM<br>N | 4601 | NE   | ARG | X | 301 | -37.531 | -4.077 | -15.072 | 1.00 | 0.00 |
| ATOM<br>H | 4602 | HE   | ARG | X | 301 | -36.769 | -4.616 | -14.714 | 1.00 | 0.00 |
| ATOM<br>C | 4603 | CZ   | ARG | X | 301 | -38.776 | -4.463 | -14.722 | 1.00 | 0.00 |
| ATOM<br>N | 4604 | NH1  | ARG | X | 301 | -39.850 | -3.752 | -15.005 | 1.00 | 0.00 |
| ATOM<br>H | 4605 | HH11 | ARG | X | 301 | -39.808 | -2.756 | -15.077 | 1.00 | 0.00 |
| ATOM<br>H | 4606 | HH12 | ARG | X | 301 | -40.708 | -4.081 | -14.611 | 1.00 | 0.00 |
| ATOM<br>N | 4607 | NH2  | ARG | X | 301 | -38.968 | -5.519 | -14.025 | 1.00 | 0.00 |
| ATOM<br>H | 4608 | HH21 | ARG | X | 301 | -38.310 | -6.250 | -13.848 | 1.00 | 0.00 |
| ATOM<br>H | 4609 | HH22 | ARG | X | 301 | -39.903 | -5.728 | -13.736 | 1.00 | 0.00 |
| ATOM<br>C | 4610 | C    | ARG | X | 301 | -36.695 | 0.990  | -17.621 | 1.00 | 0.00 |
| ATOM<br>O | 4611 | O    | ARG | X | 301 | -37.579 | 0.751  | -18.386 | 1.00 | 0.00 |
| ATOM<br>N | 4612 | N    | GLN | X | 302 | -36.150 | 2.244  | -17.484 | 1.00 | 0.00 |
| ATOM<br>H | 4613 | HN   | GLN | X | 302 | -35.327 | 2.427  | -16.952 | 1.00 | 0.00 |
| ATOM<br>C | 4614 | CA   | GLN | X | 302 | -36.473 | 3.457  | -18.267 | 1.00 | 0.00 |
| ATOM<br>H | 4615 | HA   | GLN | X | 302 | -37.457 | 3.234  | -18.653 | 1.00 | 0.00 |
| ATOM<br>C | 4616 | CB   | GLN | X | 302 | -36.534 | 4.645  | -17.304 | 1.00 | 0.00 |
| ATOM<br>H | 4617 | HB1  | GLN | X | 302 | -37.448 | 4.638  | -16.672 | 1.00 | 0.00 |
| ATOM<br>H | 4618 | HB2  | GLN | X | 302 | -36.623 | 5.516  | -17.988 | 1.00 | 0.00 |
| ATOM<br>C | 4619 | CG   | GLN | X | 302 | -35.408 | 4.814  | -16.356 | 1.00 | 0.00 |
| ATOM<br>H | 4620 | HG1  | GLN | X | 302 | -34.530 | 4.941  | -17.025 | 1.00 | 0.00 |
| ATOM<br>H | 4621 | HG2  | GLN | X | 302 | -35.167 | 3.911  | -15.756 | 1.00 | 0.00 |
| ATOM<br>C | 4622 | CD   | GLN | X | 302 | -35.527 | 6.027  | -15.441 | 1.00 | 0.00 |
| ATOM<br>O | 4623 | OE1  | GLN | X | 302 | -35.209 | 7.156  | -15.740 | 1.00 | 0.00 |
| ATOM<br>N | 4624 | NE2  | GLN | X | 302 | -36.102 | 5.776  | -14.248 | 1.00 | 0.00 |
| ATOM<br>H | 4625 | HE21 | GLN | X | 302 | -36.537 | 4.876  | -14.230 | 1.00 | 0.00 |























|           |      |     |           |         |       |         |      |      |
|-----------|------|-----|-----------|---------|-------|---------|------|------|
| ATOM<br>O | 4876 | O   | LEU X 318 | -36.104 | 8.873 | -28.433 | 1.00 | 0.00 |
| ATOM<br>N | 4877 | N   | PRO X 319 | -35.180 | 8.270 | -30.370 | 1.00 | 0.00 |
| ATOM<br>C | 4878 | CD  | PRO X 319 | -34.112 | 7.669 | -31.219 | 1.00 | 0.00 |
| ATOM<br>H | 4879 | HD1 | PRO X 319 | -33.741 | 6.709 | -30.800 | 1.00 | 0.00 |
| ATOM<br>H | 4880 | HD2 | PRO X 319 | -33.265 | 8.384 | -31.308 | 1.00 | 0.00 |
| ATOM<br>C | 4881 | CA  | PRO X 319 | -36.401 | 8.426 | -31.113 | 1.00 | 0.00 |
| ATOM<br>H | 4882 | HA  | PRO X 319 | -36.885 | 9.382 | -30.976 | 1.00 | 0.00 |
| ATOM<br>C | 4883 | CB  | PRO X 319 | -35.938 | 8.257 | -32.535 | 1.00 | 0.00 |
| ATOM<br>H | 4884 | HB1 | PRO X 319 | -35.709 | 9.279 | -32.903 | 1.00 | 0.00 |
| ATOM<br>H | 4885 | HB2 | PRO X 319 | -36.586 | 7.861 | -33.347 | 1.00 | 0.00 |
| ATOM<br>C | 4886 | CG  | PRO X 319 | -34.752 | 7.319 | -32.528 | 1.00 | 0.00 |
| ATOM<br>H | 4887 | HG1 | PRO X 319 | -35.105 | 6.265 | -32.542 | 1.00 | 0.00 |
| ATOM<br>H | 4888 | HG2 | PRO X 319 | -34.049 | 7.388 | -33.386 | 1.00 | 0.00 |
| ATOM<br>C | 4889 | C   | PRO X 319 | -37.482 | 7.404 | -30.680 | 1.00 | 0.00 |
| ATOM<br>O | 4890 | O   | PRO X 319 | -37.131 | 6.338 | -30.190 | 1.00 | 0.00 |
| ATOM<br>N | 4891 | N   | ASP X 320 | -38.702 | 7.733 | -30.878 | 1.00 | 0.00 |
| ATOM<br>H | 4892 | HN  | ASP X 320 | -39.077 | 8.581 | -31.244 | 1.00 | 0.00 |
| ATOM<br>C | 4893 | CA  | ASP X 320 | -39.891 | 6.833 | -30.778 | 1.00 | 0.00 |
| ATOM<br>H | 4894 | HA  | ASP X 320 | -39.884 | 6.384 | -29.796 | 1.00 | 0.00 |
| ATOM<br>C | 4895 | CB  | ASP X 320 | -41.237 | 7.639 | -30.936 | 1.00 | 0.00 |
| ATOM<br>H | 4896 | HB1 | ASP X 320 | -41.286 | 8.183 | -29.968 | 1.00 | 0.00 |
| ATOM<br>H | 4897 | HB2 | ASP X 320 | -42.170 | 7.041 | -31.021 | 1.00 | 0.00 |
| ATOM<br>C | 4898 | CG  | ASP X 320 | -41.290 | 8.657 | -32.031 | 1.00 | 0.00 |
| ATOM<br>O | 4899 | OD1 | ASP X 320 | -42.534 | 9.064 | -32.236 | 1.00 | 0.00 |
| ATOM<br>O | 4900 | OD2 | ASP X 320 | -40.313 | 9.204 | -32.530 | 1.00 | 0.00 |





|           |      |      |           |         |        |         |      |      |
|-----------|------|------|-----------|---------|--------|---------|------|------|
| ATOM<br>C | 4951 | CA   | GLY X 324 | -32.635 | -1.974 | -32.378 | 1.00 | 0.00 |
| ATOM<br>H | 4952 | HA1  | GLY X 324 | -31.933 | -1.157 | -32.290 | 1.00 | 0.00 |
| ATOM<br>H | 4953 | HA2  | GLY X 324 | -32.273 | -2.748 | -33.038 | 1.00 | 0.00 |
| ATOM<br>C | 4954 | C    | GLY X 324 | -32.899 | -2.486 | -31.025 | 1.00 | 0.00 |
| ATOM<br>O | 4955 | O    | GLY X 324 | -34.023 | -2.617 | -30.585 | 1.00 | 0.00 |
| ATOM<br>N | 4956 | N    | CYS X 325 | -31.772 | -2.757 | -30.286 | 1.00 | 0.00 |
| ATOM<br>H | 4957 | HN   | CYS X 325 | -30.871 | -2.659 | -30.700 | 1.00 | 0.00 |
| ATOM<br>C | 4958 | CA   | CYS X 325 | -31.727 | -3.347 | -28.941 | 1.00 | 0.00 |
| ATOM<br>H | 4959 | HA   | CYS X 325 | -32.767 | -3.386 | -28.653 | 1.00 | 0.00 |
| ATOM<br>C | 4960 | CB   | CYS X 325 | -31.234 | -4.775 | -28.906 | 1.00 | 0.00 |
| ATOM<br>H | 4961 | HB1  | CYS X 325 | -31.542 | -5.227 | -27.940 | 1.00 | 0.00 |
| ATOM<br>H | 4962 | HB2  | CYS X 325 | -30.131 | -4.801 | -29.039 | 1.00 | 0.00 |
| ATOM<br>S | 4963 | SG   | CYS X 325 | -31.928 | -5.700 | -30.290 | 1.00 | 0.00 |
| ATOM<br>C | 4964 | C    | CYS X 325 | -31.128 | -2.480 | -27.839 | 1.00 | 0.00 |
| ATOM<br>O | 4965 | O    | CYS X 325 | -30.419 | -1.518 | -28.005 | 1.00 | 0.00 |
| ATOM<br>N | 4966 | N    | VAL X 326 | -31.426 | -2.884 | -26.585 | 1.00 | 0.00 |
| ATOM<br>H | 4967 | HN   | VAL X 326 | -31.973 | -3.717 | -26.548 | 1.00 | 0.00 |
| ATOM<br>C | 4968 | CA   | VAL X 326 | -30.881 | -2.344 | -25.328 | 1.00 | 0.00 |
| ATOM<br>H | 4969 | HA   | VAL X 326 | -30.065 | -1.687 | -25.591 | 1.00 | 0.00 |
| ATOM<br>C | 4970 | CB   | VAL X 326 | -32.023 | -1.533 | -24.623 | 1.00 | 0.00 |
| ATOM<br>H | 4971 | HB   | VAL X 326 | -32.885 | -2.194 | -24.389 | 1.00 | 0.00 |
| ATOM<br>C | 4972 | CG1  | VAL X 326 | -31.468 | -1.045 | -23.200 | 1.00 | 0.00 |
| ATOM<br>H | 4973 | HG11 | VAL X 326 | -32.332 | -0.535 | -22.723 | 1.00 | 0.00 |
| ATOM<br>H | 4974 | HG12 | VAL X 326 | -30.620 | -0.341 | -23.337 | 1.00 | 0.00 |
| ATOM<br>H | 4975 | HG13 | VAL X 326 | -31.045 | -1.855 | -22.568 | 1.00 | 0.00 |









|           |      |      |           |         |        |         |      |      |
|-----------|------|------|-----------|---------|--------|---------|------|------|
| ATOM<br>C | 5051 | CA   | SER X 331 | -21.343 | -3.980 | -13.131 | 1.00 | 0.00 |
| ATOM<br>H | 5052 | HA   | SER X 331 | -20.803 | -4.827 | -13.526 | 1.00 | 0.00 |
| ATOM<br>C | 5053 | CB   | SER X 331 | -20.945 | -2.957 | -14.252 | 1.00 | 0.00 |
| ATOM<br>H | 5054 | HB1  | SER X 331 | -21.321 | -2.022 | -13.783 | 1.00 | 0.00 |
| ATOM<br>H | 5055 | HB2  | SER X 331 | -21.575 | -3.117 | -15.153 | 1.00 | 0.00 |
| ATOM<br>O | 5056 | OG   | SER X 331 | -19.553 | -2.892 | -14.535 | 1.00 | 0.00 |
| ATOM<br>H | 5057 | HG1  | SER X 331 | -19.322 | -1.961 | -14.569 | 1.00 | 0.00 |
| ATOM<br>C | 5058 | C    | SER X 331 | -20.768 | -3.660 | -11.779 | 1.00 | 0.00 |
| ATOM<br>O | 5059 | O    | SER X 331 | -19.733 | -3.059 | -11.768 | 1.00 | 0.00 |
| ATOM<br>N | 5060 | N    | ASN X 332 | -21.335 | -4.039 | -10.523 | 1.00 | 0.00 |
| ATOM<br>H | 5061 | HN   | ASN X 332 | -22.166 | -4.585 | -10.592 | 1.00 | 0.00 |
| ATOM<br>C | 5062 | CA   | ASN X 332 | -20.811 | -3.822 | -9.164  | 1.00 | 0.00 |
| ATOM<br>H | 5063 | HA   | ASN X 332 | -20.980 | -2.790 | -8.894  | 1.00 | 0.00 |
| ATOM<br>C | 5064 | CB   | ASN X 332 | -21.449 | -4.915 | -8.299  | 1.00 | 0.00 |
| ATOM<br>H | 5065 | HB1  | ASN X 332 | -21.174 | -5.942 | -8.619  | 1.00 | 0.00 |
| ATOM<br>H | 5066 | HB2  | ASN X 332 | -22.535 | -5.004 | -8.516  | 1.00 | 0.00 |
| ATOM<br>C | 5067 | CG   | ASN X 332 | -21.169 | -4.810 | -6.808  | 1.00 | 0.00 |
| ATOM<br>O | 5068 | OD1  | ASN X 332 | -20.720 | -3.715 | -6.326  | 1.00 | 0.00 |
| ATOM<br>N | 5069 | ND2  | ASN X 332 | -21.318 | -5.919 | -6.012  | 1.00 | 0.00 |
| ATOM<br>H | 5070 | HD21 | ASN X 332 | -20.750 | -5.940 | -5.189  | 1.00 | 0.00 |
| ATOM<br>H | 5071 | HD22 | ASN X 332 | -21.610 | -6.807 | -6.367  | 1.00 | 0.00 |
| ATOM<br>C | 5072 | C    | ASN X 332 | -19.359 | -4.036 | -9.189  | 1.00 | 0.00 |
| ATOM<br>O | 5073 | O    | ASN X 332 | -18.588 | -3.174 | -8.711  | 1.00 | 0.00 |
| ATOM<br>N | 5074 | N    | ASN X 333 | -18.859 | -5.194 | -9.589  | 1.00 | 0.00 |
| ATOM<br>H | 5075 | HN   | ASN X 333 | -19.440 | -5.947 | -9.885  | 1.00 | 0.00 |





|           |      |     |           |         |        |        |      |      |
|-----------|------|-----|-----------|---------|--------|--------|------|------|
| ATOM<br>O | 5126 | OG  | SER X 336 | -20.453 | -0.294 | -5.818 | 1.00 | 0.00 |
| ATOM<br>H | 5127 | HG1 | SER X 336 | -21.341 | -0.638 | -5.938 | 1.00 | 0.00 |
| ATOM<br>C | 5128 | C   | SER X 336 | -17.523 | 0.021  | -6.586 | 1.00 | 0.00 |
| ATOM<br>O | 5129 | O   | SER X 336 | -16.713 | -0.883 | -6.664 | 1.00 | 0.00 |
| ATOM<br>N | 5130 | N   | LYS X 337 | -17.513 | 0.948  | -5.634 | 1.00 | 0.00 |
| ATOM<br>H | 5131 | HN  | LYS X 337 | -18.203 | 1.664  | -5.701 | 1.00 | 0.00 |
| ATOM<br>C | 5132 | CA  | LYS X 337 | -16.342 | 1.171  | -4.805 | 1.00 | 0.00 |
| ATOM<br>H | 5133 | HA  | LYS X 337 | -15.801 | 0.240  | -4.720 | 1.00 | 0.00 |
| ATOM<br>C | 5134 | CB  | LYS X 337 | -15.380 | 2.288  | -5.314 | 1.00 | 0.00 |
| ATOM<br>H | 5135 | HB1 | LYS X 337 | -14.452 | 2.385  | -4.710 | 1.00 | 0.00 |
| ATOM<br>H | 5136 | HB2 | LYS X 337 | -15.950 | 3.241  | -5.275 | 1.00 | 0.00 |
| ATOM<br>C | 5137 | CG  | LYS X 337 | -14.823 | 2.108  | -6.790 | 1.00 | 0.00 |
| ATOM<br>H | 5138 | HG1 | LYS X 337 | -14.384 | 3.036  | -7.214 | 1.00 | 0.00 |
| ATOM<br>H | 5139 | HG2 | LYS X 337 | -15.709 | 1.965  | -7.445 | 1.00 | 0.00 |
| ATOM<br>C | 5140 | CD  | LYS X 337 | -13.861 | 0.923  | -6.866 | 1.00 | 0.00 |
| ATOM<br>H | 5141 | HD1 | LYS X 337 | -13.743 | 0.690  | -7.945 | 1.00 | 0.00 |
| ATOM<br>H | 5142 | HD2 | LYS X 337 | -14.289 | 0.012  | -6.394 | 1.00 | 0.00 |
| ATOM<br>C | 5143 | CE  | LYS X 337 | -12.417 | 1.164  | -6.202 | 1.00 | 0.00 |
| ATOM<br>H | 5144 | HE1 | LYS X 337 | -12.497 | 1.236  | -5.096 | 1.00 | 0.00 |
| ATOM<br>H | 5145 | HE2 | LYS X 337 | -11.933 | 2.079  | -6.603 | 1.00 | 0.00 |
| ATOM<br>N | 5146 | NZ  | LYS X 337 | -11.535 | 0.091  | -6.439 | 1.00 | 0.00 |
| ATOM<br>H | 5147 | HZ1 | LYS X 337 | -10.681 | 0.044  | -5.848 | 1.00 | 0.00 |
| ATOM<br>H | 5148 | HZ2 | LYS X 337 | -11.228 | -0.001 | -7.428 | 1.00 | 0.00 |
| ATOM<br>H | 5149 | HZ3 | LYS X 337 | -12.040 | -0.808 | -6.301 | 1.00 | 0.00 |
| ATOM<br>C | 5150 | C   | LYS X 337 | -16.791 | 1.590  | -3.397 | 1.00 | 0.00 |











|           |      |      |           |         |        |         |      |      |
|-----------|------|------|-----------|---------|--------|---------|------|------|
| ATOM<br>O | 5251 | O    | TYR X 344 | -21.199 | 9.703  | -11.519 | 1.00 | 0.00 |
| ATOM<br>N | 5252 | N    | LEU X 345 | -21.221 | 10.542 | -13.652 | 1.00 | 0.00 |
| ATOM<br>H | 5253 | HN   | LEU X 345 | -20.943 | 10.397 | -14.598 | 1.00 | 0.00 |
| ATOM<br>C | 5254 | CA   | LEU X 345 | -22.089 | 11.681 | -13.512 | 1.00 | 0.00 |
| ATOM<br>H | 5255 | HA   | LEU X 345 | -22.487 | 11.831 | -12.519 | 1.00 | 0.00 |
| ATOM<br>C | 5256 | CB   | LEU X 345 | -21.230 | 12.948 | -13.781 | 1.00 | 0.00 |
| ATOM<br>H | 5257 | HB1  | LEU X 345 | -21.755 | 13.919 | -13.657 | 1.00 | 0.00 |
| ATOM<br>H | 5258 | HB2  | LEU X 345 | -20.877 | 12.874 | -14.832 | 1.00 | 0.00 |
| ATOM<br>C | 5259 | CG   | LEU X 345 | -20.001 | 13.143 | -12.756 | 1.00 | 0.00 |
| ATOM<br>H | 5260 | HG   | LEU X 345 | -20.043 | 12.189 | -12.187 | 1.00 | 0.00 |
| ATOM<br>C | 5261 | CD1  | LEU X 345 | -18.649 | 13.331 | -13.451 | 1.00 | 0.00 |
| ATOM<br>H | 5262 | HD11 | LEU X 345 | -17.753 | 13.323 | -12.794 | 1.00 | 0.00 |
| ATOM<br>H | 5263 | HD12 | LEU X 345 | -18.603 | 14.241 | -14.087 | 1.00 | 0.00 |
| ATOM<br>H | 5264 | HD13 | LEU X 345 | -18.684 | 12.432 | -14.102 | 1.00 | 0.00 |
| ATOM<br>C | 5265 | CD2  | LEU X 345 | -20.271 | 14.256 | -11.767 | 1.00 | 0.00 |
| ATOM<br>H | 5266 | HD21 | LEU X 345 | -21.095 | 14.091 | -11.040 | 1.00 | 0.00 |
| ATOM<br>H | 5267 | HD22 | LEU X 345 | -20.419 | 15.210 | -12.318 | 1.00 | 0.00 |
| ATOM<br>H | 5268 | HD23 | LEU X 345 | -19.361 | 14.465 | -11.165 | 1.00 | 0.00 |
| ATOM<br>C | 5269 | C    | LEU X 345 | -23.300 | 11.607 | -14.452 | 1.00 | 0.00 |
| ATOM<br>O | 5270 | O    | LEU X 345 | -23.399 | 10.994 | -15.459 | 1.00 | 0.00 |
| ATOM<br>N | 5271 | N    | TYR X 346 | -24.307 | 12.376 | -14.100 | 1.00 | 0.00 |
| ATOM<br>H | 5272 | HN   | TYR X 346 | -24.442 | 12.650 | -13.151 | 1.00 | 0.00 |
| ATOM<br>C | 5273 | CA   | TYR X 346 | -25.574 | 12.386 | -14.787 | 1.00 | 0.00 |
| ATOM<br>H | 5274 | HA   | TYR X 346 | -25.457 | 12.168 | -15.839 | 1.00 | 0.00 |
| ATOM<br>C | 5275 | CB   | TYR X 346 | -26.744 | 11.411 | -14.323 | 1.00 | 0.00 |













|           |      |      |           |         |        |         |      |      |
|-----------|------|------|-----------|---------|--------|---------|------|------|
| ATOM<br>N | 5401 | N    | SER X 352 | -33.889 | 22.943 | -21.338 | 1.00 | 0.00 |
| ATOM<br>H | 5402 | HN   | SER X 352 | -33.005 | 22.487 | -21.278 | 1.00 | 0.00 |
| ATOM<br>C | 5403 | CA   | SER X 352 | -34.688 | 22.350 | -22.478 | 1.00 | 0.00 |
| ATOM<br>H | 5404 | HA   | SER X 352 | -35.718 | 22.541 | -22.217 | 1.00 | 0.00 |
| ATOM<br>C | 5405 | CB   | SER X 352 | -34.338 | 22.980 | -23.861 | 1.00 | 0.00 |
| ATOM<br>H | 5406 | HB1  | SER X 352 | -33.368 | 22.589 | -24.236 | 1.00 | 0.00 |
| ATOM<br>H | 5407 | HB2  | SER X 352 | -34.263 | 24.085 | -23.771 | 1.00 | 0.00 |
| ATOM<br>O | 5408 | OG   | SER X 352 | -35.380 | 22.735 | -24.827 | 1.00 | 0.00 |
| ATOM<br>H | 5409 | HG1  | SER X 352 | -36.223 | 22.869 | -24.389 | 1.00 | 0.00 |
| ATOM<br>C | 5410 | C    | SER X 352 | -34.443 | 20.841 | -22.559 | 1.00 | 0.00 |
| ATOM<br>O | 5411 | O    | SER X 352 | -33.300 | 20.402 | -22.290 | 1.00 | 0.00 |
| ATOM<br>N | 5412 | N    | ASN X 353 | -35.376 | 19.997 | -22.851 | 1.00 | 0.00 |
| ATOM<br>H | 5413 | HN   | ASN X 353 | -36.305 | 20.320 | -23.014 | 1.00 | 0.00 |
| ATOM<br>C | 5414 | CA   | ASN X 353 | -35.323 | 18.544 | -22.973 | 1.00 | 0.00 |
| ATOM<br>H | 5415 | HA   | ASN X 353 | -34.838 | 18.132 | -22.100 | 1.00 | 0.00 |
| ATOM<br>C | 5416 | CB   | ASN X 353 | -36.716 | 17.811 | -23.115 | 1.00 | 0.00 |
| ATOM<br>H | 5417 | HB1  | ASN X 353 | -36.547 | 16.713 | -23.152 | 1.00 | 0.00 |
| ATOM<br>H | 5418 | HB2  | ASN X 353 | -37.256 | 18.023 | -24.062 | 1.00 | 0.00 |
| ATOM<br>C | 5419 | CG   | ASN X 353 | -37.622 | 18.209 | -22.025 | 1.00 | 0.00 |
| ATOM<br>O | 5420 | OD1  | ASN X 353 | -37.187 | 18.502 | -20.817 | 1.00 | 0.00 |
| ATOM<br>N | 5421 | ND2  | ASN X 353 | -38.937 | 18.279 | -22.171 | 1.00 | 0.00 |
| ATOM<br>H | 5422 | HD21 | ASN X 353 | -39.453 | 18.601 | -21.377 | 1.00 | 0.00 |
| ATOM<br>H | 5423 | HD22 | ASN X 353 | -39.399 | 18.333 | -23.056 | 1.00 | 0.00 |
| ATOM<br>C | 5424 | C    | ASN X 353 | -34.424 | 18.135 | -24.159 | 1.00 | 0.00 |
| ATOM<br>O | 5425 | O    | ASN X 353 | -34.355 | 18.812 | -25.137 | 1.00 | 0.00 |

|           |      |      |           |         |        |         |      |      |
|-----------|------|------|-----------|---------|--------|---------|------|------|
| ATOM<br>N | 5426 | N    | LEU X 354 | -33.856 | 16.855 | -24.173 | 1.00 | 0.00 |
| ATOM<br>H | 5427 | HN   | LEU X 354 | -33.703 | 16.329 | -23.340 | 1.00 | 0.00 |
| ATOM<br>C | 5428 | CA   | LEU X 354 | -33.036 | 16.417 | -25.261 | 1.00 | 0.00 |
| ATOM<br>H | 5429 | HA   | LEU X 354 | -32.518 | 17.328 | -25.524 | 1.00 | 0.00 |
| ATOM<br>C | 5430 | CB   | LEU X 354 | -32.012 | 15.406 | -24.917 | 1.00 | 0.00 |
| ATOM<br>H | 5431 | HB1  | LEU X 354 | -31.333 | 15.316 | -25.791 | 1.00 | 0.00 |
| ATOM<br>H | 5432 | HB2  | LEU X 354 | -32.448 | 14.416 | -24.666 | 1.00 | 0.00 |
| ATOM<br>C | 5433 | CG   | LEU X 354 | -31.101 | 15.917 | -23.742 | 1.00 | 0.00 |
| ATOM<br>H | 5434 | HG   | LEU X 354 | -31.663 | 15.837 | -22.787 | 1.00 | 0.00 |
| ATOM<br>C | 5435 | CD1  | LEU X 354 | -29.905 | 14.915 | -23.554 | 1.00 | 0.00 |
| ATOM<br>H | 5436 | HD11 | LEU X 354 | -29.439 | 14.938 | -22.545 | 1.00 | 0.00 |
| ATOM<br>H | 5437 | HD12 | LEU X 354 | -29.166 | 15.037 | -24.374 | 1.00 | 0.00 |
| ATOM<br>H | 5438 | HD13 | LEU X 354 | -30.200 | 13.845 | -23.582 | 1.00 | 0.00 |
| ATOM<br>C | 5439 | CD2  | LEU X 354 | -30.482 | 17.293 | -23.788 | 1.00 | 0.00 |
| ATOM<br>H | 5440 | HD21 | LEU X 354 | -29.748 | 17.495 | -22.978 | 1.00 | 0.00 |
| ATOM<br>H | 5441 | HD22 | LEU X 354 | -31.265 | 18.069 | -23.926 | 1.00 | 0.00 |
| ATOM<br>H | 5442 | HD23 | LEU X 354 | -29.782 | 17.348 | -24.649 | 1.00 | 0.00 |
| ATOM<br>C | 5443 | C    | LEU X 354 | -33.816 | 15.891 | -26.443 | 1.00 | 0.00 |
| ATOM<br>O | 5444 | O    | LEU X 354 | -34.965 | 15.418 | -26.257 | 1.00 | 0.00 |
| ATOM<br>N | 5445 | N    | LYS X 355 | -33.366 | 16.095 | -27.662 | 1.00 | 0.00 |
| ATOM<br>H | 5446 | HN   | LYS X 355 | -32.519 | 16.554 | -27.919 | 1.00 | 0.00 |
| ATOM<br>C | 5447 | CA   | LYS X 355 | -33.967 | 15.415 | -28.851 | 1.00 | 0.00 |
| ATOM<br>H | 5448 | HA   | LYS X 355 | -35.013 | 15.284 | -28.615 | 1.00 | 0.00 |
| ATOM<br>C | 5449 | CB   | LYS X 355 | -33.670 | 16.357 | -30.035 | 1.00 | 0.00 |
| ATOM<br>H | 5450 | HB1  | LYS X 355 | -34.192 | 15.898 | -30.902 | 1.00 | 0.00 |















|           |      |      |     |   |     |         |        |         |      |      |
|-----------|------|------|-----|---|-----|---------|--------|---------|------|------|
| ATOM<br>H | 5601 | HB1  | GLU | X | 364 | -22.330 | 27.480 | -18.526 | 1.00 | 0.00 |
| ATOM<br>H | 5602 | HB2  | GLU | X | 364 | -22.717 | 26.114 | -19.488 | 1.00 | 0.00 |
| ATOM<br>C | 5603 | CG   | GLU | X | 364 | -20.774 | 26.791 | -19.706 | 1.00 | 0.00 |
| ATOM<br>H | 5604 | HG1  | GLU | X | 364 | -20.602 | 25.845 | -20.263 | 1.00 | 0.00 |
| ATOM<br>H | 5605 | HG2  | GLU | X | 364 | -19.895 | 27.102 | -19.101 | 1.00 | 0.00 |
| ATOM<br>C | 5606 | CD   | GLU | X | 364 | -21.130 | 27.905 | -20.694 | 1.00 | 0.00 |
| ATOM<br>O | 5607 | OE1  | GLU | X | 364 | -21.216 | 29.184 | -20.389 | 1.00 | 0.00 |
| ATOM<br>O | 5608 | OE2  | GLU | X | 364 | -21.262 | 27.545 | -21.888 | 1.00 | 0.00 |
| ATOM<br>C | 5609 | C    | GLU | X | 364 | -22.819 | 25.680 | -16.357 | 1.00 | 0.00 |
| ATOM<br>O | 5610 | O    | GLU | X | 364 | -23.693 | 24.836 | -16.297 | 1.00 | 0.00 |
| ATOM<br>N | 5611 | N    | ILE | X | 365 | -22.602 | 26.615 | -15.331 | 1.00 | 0.00 |
| ATOM<br>H | 5612 | HN   | ILE | X | 365 | -21.763 | 27.154 | -15.347 | 1.00 | 0.00 |
| ATOM<br>C | 5613 | CA   | ILE | X | 365 | -23.389 | 26.549 | -14.074 | 1.00 | 0.00 |
| ATOM<br>H | 5614 | HA   | ILE | X | 365 | -23.239 | 25.536 | -13.730 | 1.00 | 0.00 |
| ATOM<br>C | 5615 | CB   | ILE | X | 365 | -22.788 | 27.476 | -12.890 | 1.00 | 0.00 |
| ATOM<br>H | 5616 | HB   | ILE | X | 365 | -21.776 | 27.719 | -13.280 | 1.00 | 0.00 |
| ATOM<br>C | 5617 | CG2  | ILE | X | 365 | -23.413 | 28.867 | -12.893 | 1.00 | 0.00 |
| ATOM<br>H | 5618 | HG21 | ILE | X | 365 | -22.885 | 29.370 | -12.055 | 1.00 | 0.00 |
| ATOM<br>H | 5619 | HG22 | ILE | X | 365 | -24.481 | 28.909 | -12.587 | 1.00 | 0.00 |
| ATOM<br>H | 5620 | HG23 | ILE | X | 365 | -23.158 | 29.368 | -13.851 | 1.00 | 0.00 |
| ATOM<br>C | 5621 | CG1  | ILE | X | 365 | -22.883 | 26.756 | -11.524 | 1.00 | 0.00 |
| ATOM<br>H | 5622 | HG11 | ILE | X | 365 | -22.910 | 25.650 | -11.621 | 1.00 | 0.00 |
| ATOM<br>H | 5623 | HG12 | ILE | X | 365 | -23.876 | 27.064 | -11.131 | 1.00 | 0.00 |
| ATOM<br>C | 5624 | CD   | ILE | X | 365 | -21.814 | 27.084 | -10.465 | 1.00 | 0.00 |
| ATOM<br>H | 5625 | HD1  | ILE | X | 365 | -21.931 | 28.158 | -10.206 | 1.00 | 0.00 |

|           |      |     |     |   |     |         |        |         |      |      |
|-----------|------|-----|-----|---|-----|---------|--------|---------|------|------|
| ATOM<br>H | 5626 | HD2 | ILE | X | 365 | -20.818 | 26.796 | -10.866 | 1.00 | 0.00 |
| ATOM<br>H | 5627 | HD3 | ILE | X | 365 | -22.022 | 26.520 | -9.531  | 1.00 | 0.00 |
| ATOM<br>C | 5628 | C   | ILE | X | 365 | -24.875 | 26.744 | -14.369 | 1.00 | 0.00 |
| ATOM<br>O | 5629 | O   | ILE | X | 365 | -25.243 | 27.654 | -15.130 | 1.00 | 0.00 |
| ATOM<br>N | 5630 | N   | TYR | X | 366 | -25.802 | 26.029 | -13.656 | 1.00 | 0.00 |
| ATOM<br>H | 5631 | HN  | TYR | X | 366 | -25.431 | 25.525 | -12.880 | 1.00 | 0.00 |
| ATOM<br>C | 5632 | CA  | TYR | X | 366 | -27.261 | 26.209 | -13.919 | 1.00 | 0.00 |
| ATOM<br>H | 5633 | HA  | TYR | X | 366 | -27.269 | 26.667 | -14.897 | 1.00 | 0.00 |
| ATOM<br>C | 5634 | CB  | TYR | X | 366 | -28.036 | 24.837 | -13.843 | 1.00 | 0.00 |
| ATOM<br>H | 5635 | HB1 | TYR | X | 366 | -27.652 | 24.520 | -12.850 | 1.00 | 0.00 |
| ATOM<br>H | 5636 | HB2 | TYR | X | 366 | -27.553 | 24.088 | -14.506 | 1.00 | 0.00 |
| ATOM<br>C | 5637 | CG  | TYR | X | 366 | -29.550 | 24.868 | -13.859 | 1.00 | 0.00 |
| ATOM<br>C | 5638 | CD1 | TYR | X | 366 | -30.251 | 24.592 | -15.029 | 1.00 | 0.00 |
| ATOM<br>H | 5639 | HD1 | TYR | X | 366 | -29.669 | 24.435 | -15.926 | 1.00 | 0.00 |
| ATOM<br>C | 5640 | CE1 | TYR | X | 366 | -31.671 | 24.551 | -15.129 | 1.00 | 0.00 |
| ATOM<br>H | 5641 | HE1 | TYR | X | 366 | -32.065 | 24.453 | -16.129 | 1.00 | 0.00 |
| ATOM<br>C | 5642 | CZ  | TYR | X | 366 | -32.394 | 24.731 | -13.992 | 1.00 | 0.00 |
| ATOM<br>O | 5643 | OH  | TYR | X | 366 | -33.802 | 24.657 | -14.224 | 1.00 | 0.00 |
| ATOM<br>H | 5644 | HH  | TYR | X | 366 | -34.228 | 24.980 | -13.427 | 1.00 | 0.00 |
| ATOM<br>C | 5645 | CD2 | TYR | X | 366 | -30.343 | 24.942 | -12.683 | 1.00 | 0.00 |
| ATOM<br>H | 5646 | HD2 | TYR | X | 366 | -29.806 | 25.039 | -11.751 | 1.00 | 0.00 |
| ATOM<br>C | 5647 | CE2 | TYR | X | 366 | -31.785 | 24.909 | -12.750 | 1.00 | 0.00 |
| ATOM<br>H | 5648 | HE2 | TYR | X | 366 | -32.423 | 24.873 | -11.880 | 1.00 | 0.00 |
| ATOM<br>C | 5649 | C   | TYR | X | 366 | -27.889 | 27.252 | -12.982 | 1.00 | 0.00 |
| ATOM<br>O | 5650 | O   | TYR | X | 366 | -27.913 | 27.138 | -11.727 | 1.00 | 0.00 |

|           |      |      |           |         |        |         |      |      |
|-----------|------|------|-----------|---------|--------|---------|------|------|
| ATOM<br>N | 5651 | N    | GLN X 367 | -28.509 | 28.380 | -13.504 | 1.00 | 0.00 |
| ATOM<br>H | 5652 | HN   | GLN X 367 | -28.455 | 28.445 | -14.498 | 1.00 | 0.00 |
| ATOM<br>C | 5653 | CA   | GLN X 367 | -29.283 | 29.367 | -12.688 | 1.00 | 0.00 |
| ATOM<br>H | 5654 | HA   | GLN X 367 | -29.034 | 29.160 | -11.658 | 1.00 | 0.00 |
| ATOM<br>C | 5655 | CB   | GLN X 367 | -28.980 | 30.859 | -13.141 | 1.00 | 0.00 |
| ATOM<br>H | 5656 | HB1  | GLN X 367 | -29.476 | 31.600 | -12.478 | 1.00 | 0.00 |
| ATOM<br>H | 5657 | HB2  | GLN X 367 | -29.384 | 30.885 | -14.176 | 1.00 | 0.00 |
| ATOM<br>C | 5658 | CG   | GLN X 367 | -27.456 | 31.257 | -13.221 | 1.00 | 0.00 |
| ATOM<br>H | 5659 | HG1  | GLN X 367 | -26.914 | 30.412 | -13.698 | 1.00 | 0.00 |
| ATOM<br>H | 5660 | HG2  | GLN X 367 | -27.239 | 31.308 | -12.133 | 1.00 | 0.00 |
| ATOM<br>C | 5661 | CD   | GLN X 367 | -27.296 | 32.601 | -13.938 | 1.00 | 0.00 |
| ATOM<br>O | 5662 | OE1  | GLN X 367 | -27.009 | 33.653 | -13.340 | 1.00 | 0.00 |
| ATOM<br>N | 5663 | NE2  | GLN X 367 | -27.582 | 32.570 | -15.295 | 1.00 | 0.00 |
| ATOM<br>H | 5664 | HE21 | GLN X 367 | -27.166 | 33.296 | -15.842 | 1.00 | 0.00 |
| ATOM<br>H | 5665 | HE22 | GLN X 367 | -27.922 | 31.712 | -15.681 | 1.00 | 0.00 |
| ATOM<br>C | 5666 | C    | GLN X 367 | -30.768 | 29.051 | -12.803 | 1.00 | 0.00 |
| ATOM<br>O | 5667 | O    | GLN X 367 | -31.280 | 29.097 | -13.923 | 1.00 | 0.00 |
| ATOM<br>N | 5668 | N    | ALA X 368 | -31.468 | 28.743 | -11.687 | 1.00 | 0.00 |
| ATOM<br>H | 5669 | HN   | ALA X 368 | -31.057 | 28.826 | -10.782 | 1.00 | 0.00 |
| ATOM<br>C | 5670 | CA   | ALA X 368 | -32.900 | 28.360 | -11.668 | 1.00 | 0.00 |
| ATOM<br>H | 5671 | HA   | ALA X 368 | -32.907 | 27.588 | -12.424 | 1.00 | 0.00 |
| ATOM<br>C | 5672 | CB   | ALA X 368 | -33.292 | 27.457 | -10.503 | 1.00 | 0.00 |
| ATOM<br>H | 5673 | HB1  | ALA X 368 | -32.489 | 26.766 | -10.169 | 1.00 | 0.00 |
| ATOM<br>H | 5674 | HB2  | ALA X 368 | -34.246 | 26.916 | -10.680 | 1.00 | 0.00 |
| ATOM<br>H | 5675 | HB3  | ALA X 368 | -33.546 | 28.207 | -9.724  | 1.00 | 0.00 |



















|           |      |     |           |         |        |         |      |      |
|-----------|------|-----|-----------|---------|--------|---------|------|------|
| ATOM<br>C | 5876 | C   | PHE X 383 | -25.062 | 21.679 | -11.317 | 1.00 | 0.00 |
| ATOM<br>O | 5877 | O   | PHE X 383 | -25.784 | 21.010 | -10.620 | 1.00 | 0.00 |
| ATOM<br>N | 5878 | N   | PRO X 384 | -25.097 | 21.572 | -12.650 | 1.00 | 0.00 |
| ATOM<br>C | 5879 | CD  | PRO X 384 | -24.239 | 22.365 | -13.609 | 1.00 | 0.00 |
| ATOM<br>H | 5880 | HD1 | PRO X 384 | -23.202 | 22.489 | -13.230 | 1.00 | 0.00 |
| ATOM<br>H | 5881 | HD2 | PRO X 384 | -24.639 | 23.383 | -13.804 | 1.00 | 0.00 |
| ATOM<br>C | 5882 | CA  | PRO X 384 | -25.963 | 20.566 | -13.377 | 1.00 | 0.00 |
| ATOM<br>H | 5883 | HA  | PRO X 384 | -26.957 | 20.727 | -12.984 | 1.00 | 0.00 |
| ATOM<br>C | 5884 | CB  | PRO X 384 | -25.719 | 21.014 | -14.848 | 1.00 | 0.00 |
| ATOM<br>H | 5885 | HB1 | PRO X 384 | -26.530 | 21.771 | -14.885 | 1.00 | 0.00 |
| ATOM<br>H | 5886 | HB2 | PRO X 384 | -25.971 | 20.267 | -15.631 | 1.00 | 0.00 |
| ATOM<br>C | 5887 | CG  | PRO X 384 | -24.348 | 21.569 | -14.889 | 1.00 | 0.00 |
| ATOM<br>H | 5888 | HG1 | PRO X 384 | -23.594 | 20.759 | -14.991 | 1.00 | 0.00 |
| ATOM<br>H | 5889 | HG2 | PRO X 384 | -24.058 | 22.177 | -15.773 | 1.00 | 0.00 |
| ATOM<br>C | 5890 | C   | PRO X 384 | -25.756 | 19.080 | -13.086 | 1.00 | 0.00 |
| ATOM<br>O | 5891 | O   | PRO X 384 | -26.695 | 18.281 | -13.103 | 1.00 | 0.00 |
| ATOM<br>N | 5892 | N   | LEU X 385 | -24.508 | 18.714 | -12.776 | 1.00 | 0.00 |
| ATOM<br>H | 5893 | HN  | LEU X 385 | -23.780 | 19.383 | -12.902 | 1.00 | 0.00 |
| ATOM<br>C | 5894 | CA  | LEU X 385 | -24.064 | 17.305 | -12.877 | 1.00 | 0.00 |
| ATOM<br>H | 5895 | HA  | LEU X 385 | -24.866 | 16.731 | -13.317 | 1.00 | 0.00 |
| ATOM<br>C | 5896 | CB  | LEU X 385 | -22.791 | 17.110 | -13.843 | 1.00 | 0.00 |
| ATOM<br>H | 5897 | HB1 | LEU X 385 | -22.719 | 16.020 | -14.050 | 1.00 | 0.00 |
| ATOM<br>H | 5898 | HB2 | LEU X 385 | -21.778 | 17.355 | -13.459 | 1.00 | 0.00 |
| ATOM<br>C | 5899 | CG  | LEU X 385 | -22.742 | 17.838 | -15.206 | 1.00 | 0.00 |
| ATOM<br>H | 5900 | HG  | LEU X 385 | -22.689 | 18.902 | -14.891 | 1.00 | 0.00 |



|           |      |     |           |         |        |         |      |      |
|-----------|------|-----|-----------|---------|--------|---------|------|------|
| ATOM<br>C | 5926 | C   | GLN X 386 | -23.712 | 13.414 | -10.190 | 1.00 | 0.00 |
| ATOM<br>O | 5927 | O   | GLN X 386 | -24.101 | 12.768 | -11.135 | 1.00 | 0.00 |
| ATOM<br>N | 5928 | N   | SER X 387 | -22.778 | 13.039 | -9.352  | 1.00 | 0.00 |
| ATOM<br>H | 5929 | HN  | SER X 387 | -22.508 | 13.531 | -8.528  | 1.00 | 0.00 |
| ATOM<br>C | 5930 | CA  | SER X 387 | -22.118 | 11.757 | -9.458  | 1.00 | 0.00 |
| ATOM<br>H | 5931 | HA  | SER X 387 | -22.048 | 11.601 | -10.524 | 1.00 | 0.00 |
| ATOM<br>C | 5932 | CB  | SER X 387 | -20.696 | 11.425 | -9.010  | 1.00 | 0.00 |
| ATOM<br>H | 5933 | HB1 | SER X 387 | -19.962 | 12.079 | -9.528  | 1.00 | 0.00 |
| ATOM<br>H | 5934 | HB2 | SER X 387 | -20.386 | 10.361 | -9.094  | 1.00 | 0.00 |
| ATOM<br>O | 5935 | OG  | SER X 387 | -20.581 | 11.753 | -7.578  | 1.00 | 0.00 |
| ATOM<br>H | 5936 | HG1 | SER X 387 | -20.320 | 12.676 | -7.539  | 1.00 | 0.00 |
| ATOM<br>C | 5937 | C   | SER X 387 | -23.003 | 10.742 | -8.785  | 1.00 | 0.00 |
| ATOM<br>O | 5938 | O   | SER X 387 | -23.647 | 11.071 | -7.796  | 1.00 | 0.00 |
| ATOM<br>N | 5939 | N   | TYR X 388 | -23.059 | 9.481  | -9.307  | 1.00 | 0.00 |
| ATOM<br>H | 5940 | HN  | TYR X 388 | -22.561 | 9.313  | -10.154 | 1.00 | 0.00 |
| ATOM<br>C | 5941 | CA  | TYR X 388 | -23.854 | 8.390  | -8.761  | 1.00 | 0.00 |
| ATOM<br>H | 5942 | HA  | TYR X 388 | -24.885 | 8.703  | -8.682  | 1.00 | 0.00 |
| ATOM<br>C | 5943 | CB  | TYR X 388 | -23.798 | 7.160  | -9.611  | 1.00 | 0.00 |
| ATOM<br>H | 5944 | HB1 | TYR X 388 | -24.045 | 6.199  | -9.111  | 1.00 | 0.00 |
| ATOM<br>H | 5945 | HB2 | TYR X 388 | -22.813 | 7.058  | -10.114 | 1.00 | 0.00 |
| ATOM<br>C | 5946 | CG  | TYR X 388 | -24.815 | 7.181  | -10.765 | 1.00 | 0.00 |
| ATOM<br>C | 5947 | CD1 | TYR X 388 | -26.197 | 7.181  | -10.459 | 1.00 | 0.00 |
| ATOM<br>H | 5948 | HD1 | TYR X 388 | -26.481 | 7.143  | -9.417  | 1.00 | 0.00 |
| ATOM<br>C | 5949 | CE1 | TYR X 388 | -27.215 | 7.148  | -11.431 | 1.00 | 0.00 |
| ATOM<br>H | 5950 | HE1 | TYR X 388 | -28.244 | 6.970  | -11.155 | 1.00 | 0.00 |







|           |      |      |     |   |     |         |        |        |      |      |
|-----------|------|------|-----|---|-----|---------|--------|--------|------|------|
| ATOM<br>H | 6001 | HE22 | GLN | X | 391 | -21.602 | 6.417  | 0.060  | 1.00 | 0.00 |
| ATOM<br>C | 6002 | C    | GLN | X | 391 | -21.588 | 0.473  | -2.785 | 1.00 | 0.00 |
| ATOM<br>O | 6003 | O    | GLN | X | 391 | -22.841 | 0.539  | -2.742 | 1.00 | 0.00 |
| ATOM<br>N | 6004 | N    | PRO | X | 392 | -21.084 | -0.660 | -2.491 | 1.00 | 0.00 |
| ATOM<br>C | 6005 | CD   | PRO | X | 392 | -19.575 | -0.774 | -2.395 | 1.00 | 0.00 |
| ATOM<br>H | 6006 | HD1  | PRO | X | 392 | -19.063 | -0.221 | -1.578 | 1.00 | 0.00 |
| ATOM<br>H | 6007 | HD2  | PRO | X | 392 | -19.063 | -0.552 | -3.355 | 1.00 | 0.00 |
| ATOM<br>C | 6008 | CA   | PRO | X | 392 | -21.771 | -1.943 | -2.710 | 1.00 | 0.00 |
| ATOM<br>H | 6009 | HA   | PRO | X | 392 | -22.391 | -1.833 | -3.587 | 1.00 | 0.00 |
| ATOM<br>C | 6010 | CB   | PRO | X | 392 | -20.618 | -2.939 | -2.947 | 1.00 | 0.00 |
| ATOM<br>H | 6011 | HB1  | PRO | X | 392 | -20.191 | -2.799 | -3.963 | 1.00 | 0.00 |
| ATOM<br>H | 6012 | HB2  | PRO | X | 392 | -20.822 | -4.013 | -2.746 | 1.00 | 0.00 |
| ATOM<br>C | 6013 | CG   | PRO | X | 392 | -19.458 | -2.234 | -2.075 | 1.00 | 0.00 |
| ATOM<br>H | 6014 | HG1  | PRO | X | 392 | -19.636 | -2.443 | -0.999 | 1.00 | 0.00 |
| ATOM<br>H | 6015 | HG2  | PRO | X | 392 | -18.481 | -2.649 | -2.403 | 1.00 | 0.00 |
| ATOM<br>C | 6016 | C    | PRO | X | 392 | -22.664 | -2.286 | -1.555 | 1.00 | 0.00 |
| ATOM<br>O | 6017 | O    | PRO | X | 392 | -23.233 | -3.337 | -1.632 | 1.00 | 0.00 |
| ATOM<br>N | 6018 | N    | THR | X | 393 | -22.711 | -1.501 | -0.417 | 1.00 | 0.00 |
| ATOM<br>H | 6019 | HN   | THR | X | 393 | -22.132 | -0.705 | -0.258 | 1.00 | 0.00 |
| ATOM<br>C | 6020 | CA   | THR | X | 393 | -23.595 | -1.788 | 0.704  | 1.00 | 0.00 |
| ATOM<br>H | 6021 | HA   | THR | X | 393 | -23.842 | -2.824 | 0.883  | 1.00 | 0.00 |
| ATOM<br>C | 6022 | CB   | THR | X | 393 | -22.871 | -1.452 | 2.070  | 1.00 | 0.00 |
| ATOM<br>H | 6023 | HB   | THR | X | 393 | -23.613 | -1.559 | 2.890  | 1.00 | 0.00 |
| ATOM<br>O | 6024 | OG1  | THR | X | 393 | -22.345 | -0.144 | 2.000  | 1.00 | 0.00 |
| ATOM<br>H | 6025 | HG1  | THR | X | 393 | -23.054 | 0.487  | 2.144  | 1.00 | 0.00 |











|           |      |      |           |         |        |         |      |      |
|-----------|------|------|-----------|---------|--------|---------|------|------|
| ATOM<br>C | 6151 | CA   | ARG X 402 | -23.178 | -1.237 | -17.751 | 1.00 | 0.00 |
| ATOM<br>H | 6152 | HA   | ARG X 402 | -23.008 | -0.170 | -17.780 | 1.00 | 0.00 |
| ATOM<br>C | 6153 | CB   | ARG X 402 | -21.898 | -1.977 | -18.133 | 1.00 | 0.00 |
| ATOM<br>H | 6154 | HB1  | ARG X 402 | -21.721 | -1.909 | -19.227 | 1.00 | 0.00 |
| ATOM<br>H | 6155 | HB2  | ARG X 402 | -22.079 | -3.056 | -17.940 | 1.00 | 0.00 |
| ATOM<br>C | 6156 | CG   | ARG X 402 | -20.665 | -1.421 | -17.409 | 1.00 | 0.00 |
| ATOM<br>H | 6157 | HG1  | ARG X 402 | -20.865 | -1.447 | -16.317 | 1.00 | 0.00 |
| ATOM<br>H | 6158 | HG2  | ARG X 402 | -20.590 | -0.329 | -17.601 | 1.00 | 0.00 |
| ATOM<br>C | 6159 | CD   | ARG X 402 | -19.368 | -2.078 | -17.585 | 1.00 | 0.00 |
| ATOM<br>H | 6160 | HD1  | ARG X 402 | -19.134 | -2.288 | -18.651 | 1.00 | 0.00 |
| ATOM<br>H | 6161 | HD2  | ARG X 402 | -19.365 | -3.075 | -17.095 | 1.00 | 0.00 |
| ATOM<br>N | 6162 | NE   | ARG X 402 | -18.319 | -1.278 | -16.896 | 1.00 | 0.00 |
| ATOM<br>H | 6163 | HE   | ARG X 402 | -18.644 | -0.698 | -16.149 | 1.00 | 0.00 |
| ATOM<br>C | 6164 | CZ   | ARG X 402 | -17.021 | -1.297 | -17.101 | 1.00 | 0.00 |
| ATOM<br>N | 6165 | NH1  | ARG X 402 | -16.466 | -2.074 | -18.019 | 1.00 | 0.00 |
| ATOM<br>H | 6166 | HH11 | ARG X 402 | -16.923 | -2.845 | -18.462 | 1.00 | 0.00 |
| ATOM<br>H | 6167 | HH12 | ARG X 402 | -15.482 | -2.207 | -17.899 | 1.00 | 0.00 |
| ATOM<br>N | 6168 | NH2  | ARG X 402 | -16.246 | -0.593 | -16.336 | 1.00 | 0.00 |
| ATOM<br>H | 6169 | HH21 | ARG X 402 | -16.751 | -0.028 | -15.683 | 1.00 | 0.00 |
| ATOM<br>H | 6170 | HH22 | ARG X 402 | -15.259 | -0.590 | -16.494 | 1.00 | 0.00 |
| ATOM<br>C | 6171 | C    | ARG X 402 | -24.181 | -1.601 | -18.834 | 1.00 | 0.00 |
| ATOM<br>O | 6172 | O    | ARG X 402 | -24.790 | -2.665 | -18.887 | 1.00 | 0.00 |
| ATOM<br>N | 6173 | N    | VAL X 403 | -24.378 | -0.592 | -19.727 | 1.00 | 0.00 |
| ATOM<br>H | 6174 | HN   | VAL X 403 | -23.988 | 0.287  | -19.463 | 1.00 | 0.00 |
| ATOM<br>C | 6175 | CA   | VAL X 403 | -25.363 | -0.562 | -20.741 | 1.00 | 0.00 |





|           |      |      |           |         |        |         |      |      |
|-----------|------|------|-----------|---------|--------|---------|------|------|
| ATOM<br>H | 6201 | HG22 | VAL X 404 | -22.776 | -2.142 | -23.450 | 1.00 | 0.00 |
| ATOM<br>H | 6202 | HG23 | VAL X 404 | -22.356 | -0.731 | -24.367 | 1.00 | 0.00 |
| ATOM<br>C | 6203 | C    | VAL X 404 | -26.294 | -0.865 | -25.146 | 1.00 | 0.00 |
| ATOM<br>O | 6204 | O    | VAL X 404 | -27.109 | -1.796 | -25.038 | 1.00 | 0.00 |
| ATOM<br>N | 6205 | N    | VAL X 405 | -26.542 | 0.184  | -25.988 | 1.00 | 0.00 |
| ATOM<br>H | 6206 | HN   | VAL X 405 | -25.778 | 0.825  | -25.971 | 1.00 | 0.00 |
| ATOM<br>C | 6207 | CA   | VAL X 405 | -27.597 | 0.265  | -26.926 | 1.00 | 0.00 |
| ATOM<br>H | 6208 | HA   | VAL X 405 | -28.368 | -0.408 | -26.583 | 1.00 | 0.00 |
| ATOM<br>C | 6209 | CB   | VAL X 405 | -28.210 | 1.698  | -27.018 | 1.00 | 0.00 |
| ATOM<br>H | 6210 | HB   | VAL X 405 | -27.406 | 2.464  | -27.047 | 1.00 | 0.00 |
| ATOM<br>C | 6211 | CG1  | VAL X 405 | -29.345 | 1.785  | -28.033 | 1.00 | 0.00 |
| ATOM<br>H | 6212 | HG11 | VAL X 405 | -29.073 | 1.925  | -29.101 | 1.00 | 0.00 |
| ATOM<br>H | 6213 | HG12 | VAL X 405 | -30.002 | 2.638  | -27.759 | 1.00 | 0.00 |
| ATOM<br>H | 6214 | HG13 | VAL X 405 | -29.960 | 0.861  | -27.977 | 1.00 | 0.00 |
| ATOM<br>C | 6215 | CG2  | VAL X 405 | -28.886 | 1.846  | -25.668 | 1.00 | 0.00 |
| ATOM<br>H | 6216 | HG21 | VAL X 405 | -28.176 | 1.635  | -24.840 | 1.00 | 0.00 |
| ATOM<br>H | 6217 | HG22 | VAL X 405 | -29.723 | 1.129  | -25.525 | 1.00 | 0.00 |
| ATOM<br>H | 6218 | HG23 | VAL X 405 | -29.213 | 2.898  | -25.526 | 1.00 | 0.00 |
| ATOM<br>C | 6219 | C    | VAL X 405 | -27.041 | -0.177 | -28.325 | 1.00 | 0.00 |
| ATOM<br>O | 6220 | O    | VAL X 405 | -25.914 | 0.166  | -28.685 | 1.00 | 0.00 |
| ATOM<br>N | 6221 | N    | LEU X 406 | -27.846 | -0.910 | -29.079 | 1.00 | 0.00 |
| ATOM<br>H | 6222 | HN   | LEU X 406 | -28.693 | -1.349 | -28.787 | 1.00 | 0.00 |
| ATOM<br>C | 6223 | CA   | LEU X 406 | -27.491 | -1.177 | -30.469 | 1.00 | 0.00 |
| ATOM<br>H | 6224 | HA   | LEU X 406 | -26.570 | -0.667 | -30.710 | 1.00 | 0.00 |
| ATOM<br>C | 6225 | CB   | LEU X 406 | -27.375 | -2.679 | -30.729 | 1.00 | 0.00 |



|           |      |     |           |         |        |         |      |      |
|-----------|------|-----|-----------|---------|--------|---------|------|------|
| ATOM<br>N | 6251 | N   | PHE X 408 | -30.054 | -0.004 | -35.160 | 1.00 | 0.00 |
| ATOM<br>H | 6252 | HN  | PHE X 408 | -31.009 | -0.029 | -34.876 | 1.00 | 0.00 |
| ATOM<br>C | 6253 | CA  | PHE X 408 | -29.908 | -0.555 | -36.473 | 1.00 | 0.00 |
| ATOM<br>H | 6254 | HA  | PHE X 408 | -28.884 | -0.623 | -36.810 | 1.00 | 0.00 |
| ATOM<br>C | 6255 | CB  | PHE X 408 | -30.571 | -1.938 | -36.655 | 1.00 | 0.00 |
| ATOM<br>H | 6256 | HB1 | PHE X 408 | -30.321 | -2.399 | -37.635 | 1.00 | 0.00 |
| ATOM<br>H | 6257 | HB2 | PHE X 408 | -31.674 | -1.811 | -36.635 | 1.00 | 0.00 |
| ATOM<br>C | 6258 | CG  | PHE X 408 | -30.352 | -2.916 | -35.547 | 1.00 | 0.00 |
| ATOM<br>C | 6259 | CD1 | PHE X 408 | -29.169 | -3.132 | -34.878 | 1.00 | 0.00 |
| ATOM<br>H | 6260 | HD1 | PHE X 408 | -28.401 | -2.434 | -35.178 | 1.00 | 0.00 |
| ATOM<br>C | 6261 | CE1 | PHE X 408 | -28.992 | -4.123 | -33.917 | 1.00 | 0.00 |
| ATOM<br>H | 6262 | HE1 | PHE X 408 | -28.085 | -4.358 | -33.380 | 1.00 | 0.00 |
| ATOM<br>C | 6263 | CZ  | PHE X 408 | -30.045 | -5.056 | -33.788 | 1.00 | 0.00 |
| ATOM<br>H | 6264 | HZ  | PHE X 408 | -29.863 | -5.836 | -33.063 | 1.00 | 0.00 |
| ATOM<br>C | 6265 | CD2 | PHE X 408 | -31.394 | -3.880 | -35.378 | 1.00 | 0.00 |
| ATOM<br>H | 6266 | HD2 | PHE X 408 | -32.301 | -3.806 | -35.960 | 1.00 | 0.00 |
| ATOM<br>C | 6267 | CE2 | PHE X 408 | -31.235 | -4.961 | -34.501 | 1.00 | 0.00 |
| ATOM<br>H | 6268 | HE2 | PHE X 408 | -32.043 | -5.660 | -34.342 | 1.00 | 0.00 |
| ATOM<br>C | 6269 | C   | PHE X 408 | -30.414 | 0.446  | -37.460 | 1.00 | 0.00 |
| ATOM<br>O | 6270 | O   | PHE X 408 | -31.591 | 0.931  | -37.333 | 1.00 | 0.00 |
| ATOM<br>N | 6271 | N   | GLU X 409 | -29.595 | 0.795  | -38.501 | 1.00 | 0.00 |
| ATOM<br>H | 6272 | HN  | GLU X 409 | -28.649 | 0.508  | -38.629 | 1.00 | 0.00 |
| ATOM<br>C | 6273 | CA  | GLU X 409 | -29.966 | 1.734  | -39.538 | 1.00 | 0.00 |
| ATOM<br>H | 6274 | HA  | GLU X 409 | -31.023 | 1.942  | -39.453 | 1.00 | 0.00 |
| ATOM<br>C | 6275 | CB  | GLU X 409 | -29.186 | 3.141  | -39.561 | 1.00 | 0.00 |

|           |      |      |     |   |     |         |        |         |      |      |
|-----------|------|------|-----|---|-----|---------|--------|---------|------|------|
| ATOM<br>H | 6276 | HB1  | GLU | X | 409 | -28.113 | 2.909  | -39.388 | 1.00 | 0.00 |
| ATOM<br>H | 6277 | HB2  | GLU | X | 409 | -29.488 | 3.656  | -38.624 | 1.00 | 0.00 |
| ATOM<br>C | 6278 | CG   | GLU | X | 409 | -29.207 | 4.078  | -40.800 | 1.00 | 0.00 |
| ATOM<br>H | 6279 | HG1  | GLU | X | 409 | -30.201 | 4.563  | -40.904 | 1.00 | 0.00 |
| ATOM<br>H | 6280 | HG2  | GLU | X | 409 | -29.219 | 3.509  | -41.754 | 1.00 | 0.00 |
| ATOM<br>C | 6281 | CD   | GLU | X | 409 | -28.140 | 5.136  | -40.688 | 1.00 | 0.00 |
| ATOM<br>O | 6282 | OE1  | GLU | X | 409 | -28.455 | 6.089  | -39.941 | 1.00 | 0.00 |
| ATOM<br>O | 6283 | OE2  | GLU | X | 409 | -27.136 | 5.110  | -41.404 | 1.00 | 0.00 |
| ATOM<br>C | 6284 | C    | GLU | X | 409 | -29.841 | 1.002  | -40.841 | 1.00 | 0.00 |
| ATOM<br>O | 6285 | O    | GLU | X | 409 | -28.773 | 0.366  | -41.164 | 1.00 | 0.00 |
| ATOM<br>N | 6286 | N    | LEU | X | 410 | -30.935 | 1.068  | -41.630 | 1.00 | 0.00 |
| ATOM<br>H | 6287 | HN   | LEU | X | 410 | -31.619 | 1.747  | -41.371 | 1.00 | 0.00 |
| ATOM<br>C | 6288 | CA   | LEU | X | 410 | -30.995 | 0.409  | -42.991 | 1.00 | 0.00 |
| ATOM<br>H | 6289 | HA   | LEU | X | 410 | -29.995 | 0.065  | -43.210 | 1.00 | 0.00 |
| ATOM<br>C | 6290 | CB   | LEU | X | 410 | -32.031 | -0.752 | -43.118 | 1.00 | 0.00 |
| ATOM<br>H | 6291 | HB1  | LEU | X | 410 | -33.073 | -0.464 | -42.860 | 1.00 | 0.00 |
| ATOM<br>H | 6292 | HB2  | LEU | X | 410 | -31.826 | -1.297 | -42.173 | 1.00 | 0.00 |
| ATOM<br>C | 6293 | CG   | LEU | X | 410 | -31.778 | -1.642 | -44.399 | 1.00 | 0.00 |
| ATOM<br>H | 6294 | HG   | LEU | X | 410 | -31.860 | -0.961 | -45.273 | 1.00 | 0.00 |
| ATOM<br>C | 6295 | CD1  | LEU | X | 410 | -30.397 | -2.407 | -44.387 | 1.00 | 0.00 |
| ATOM<br>H | 6296 | HD11 | LEU | X | 410 | -29.488 | -1.810 | -44.158 | 1.00 | 0.00 |
| ATOM<br>H | 6297 | HD12 | LEU | X | 410 | -30.120 | -2.829 | -45.377 | 1.00 | 0.00 |
| ATOM<br>H | 6298 | HD13 | LEU | X | 410 | -30.363 | -3.259 | -43.675 | 1.00 | 0.00 |
| ATOM<br>C | 6299 | CD2  | LEU | X | 410 | -32.906 | -2.618 | -44.594 | 1.00 | 0.00 |
| ATOM<br>H | 6300 | HD21 | LEU | X | 410 | -33.890 | -2.109 | -44.677 | 1.00 | 0.00 |



|           |      |     |     |   |     |         |         |         |      |      |
|-----------|------|-----|-----|---|-----|---------|---------|---------|------|------|
| ATOM<br>C | 6326 | C3  | GLC | X | 411 | -17.869 | -11.970 | -23.517 | 1.00 | 0.00 |
| ATOM<br>H | 6327 | H3  | GLC | X | 411 | -18.861 | -11.543 | -23.255 | 1.00 | 0.00 |
| ATOM<br>O | 6328 | O3  | GLC | X | 411 | -17.828 | -12.889 | -24.581 | 1.00 | 0.00 |
| ATOM<br>H | 6329 | H03 | GLC | X | 411 | -17.798 | -13.754 | -24.166 | 1.00 | 0.00 |
| ATOM<br>C | 6330 | C4  | GLC | X | 411 | -17.408 | -12.574 | -22.277 | 1.00 | 0.00 |
| ATOM<br>H | 6331 | H4  | GLC | X | 411 | -16.404 | -13.044 | -22.358 | 1.00 | 0.00 |
| ATOM<br>O | 6332 | O4  | GLC | X | 411 | -18.265 | -13.582 | -21.795 | 1.00 | 0.00 |
| ATOM<br>C | 6333 | C6  | GLC | X | 411 | -16.669 | -12.102 | -19.944 | 1.00 | 0.00 |
| ATOM<br>H | 6334 | H61 | GLC | X | 411 | -15.700 | -12.609 | -20.138 | 1.00 | 0.00 |
| ATOM<br>H | 6335 | H62 | GLC | X | 411 | -17.305 | -12.914 | -19.530 | 1.00 | 0.00 |
| ATOM<br>O | 6336 | O6  | GLC | X | 411 | -16.511 | -11.128 | -18.959 | 1.00 | 0.00 |
| ATOM<br>C | 6337 | C1  | FUC | X | 412 | -17.232 | -11.394 | -17.749 | 1.00 | 0.00 |
| ATOM<br>H | 6338 | H1  | FUC | X | 412 | -16.888 | -12.419 | -17.495 | 1.00 | 0.00 |
| ATOM<br>C | 6339 | C5  | FUC | X | 412 | -19.097 | -10.049 | -18.338 | 1.00 | 0.00 |
| ATOM<br>H | 6340 | H5  | FUC | X | 412 | -18.501 | -9.598  | -19.161 | 1.00 | 0.00 |
| ATOM<br>O | 6341 | O5  | FUC | X | 412 | -18.643 | -11.324 | -17.952 | 1.00 | 0.00 |
| ATOM<br>C | 6342 | C2  | FUC | X | 412 | -16.771 | -10.454 | -16.645 | 1.00 | 0.00 |
| ATOM<br>H | 6343 | H2  | FUC | X | 412 | -17.145 | -10.750 | -15.642 | 1.00 | 0.00 |
| ATOM<br>O | 6344 | O2  | FUC | X | 412 | -15.364 | -10.419 | -16.471 | 1.00 | 0.00 |
| ATOM<br>H | 6345 | H02 | FUC | X | 412 | -15.317 | -10.726 | -15.563 | 1.00 | 0.00 |
| ATOM<br>C | 6346 | C3  | FUC | X | 412 | -17.301 | -8.970  | -16.798 | 1.00 | 0.00 |
| ATOM<br>H | 6347 | H3  | FUC | X | 412 | -16.754 | -8.415  | -17.590 | 1.00 | 0.00 |
| ATOM<br>O | 6348 | O3  | FUC | X | 412 | -17.005 | -8.254  | -15.659 | 1.00 | 0.00 |
| ATOM<br>H | 6349 | H03 | FUC | X | 412 | -16.084 | -8.422  | -15.447 | 1.00 | 0.00 |
| ATOM<br>C | 6350 | C4  | FUC | X | 412 | -18.799 | -9.001  | -17.114 | 1.00 | 0.00 |

|           |      |     |           |         |         |         |      |      |
|-----------|------|-----|-----------|---------|---------|---------|------|------|
| ATOM<br>H | 6351 | H4  | FUC X 412 | -19.227 | -8.063  | -17.528 | 1.00 | 0.00 |
| ATOM<br>O | 6352 | 04  | FUC X 412 | -19.497 | -9.332  | -15.920 | 1.00 | 0.00 |
| ATOM<br>H | 6353 | H04 | FUC X 412 | -19.640 | -8.617  | -15.295 | 1.00 | 0.00 |
| ATOM<br>C | 6354 | C6  | FUC X 412 | -20.679 | -10.140 | -18.600 | 1.00 | 0.00 |
| ATOM<br>H | 6355 | H61 | FUC X 412 | -21.191 | -9.192  | -18.872 | 1.00 | 0.00 |
| ATOM<br>H | 6356 | H62 | FUC X 412 | -21.222 | -10.606 | -17.751 | 1.00 | 0.00 |
| ATOM<br>H | 6357 | H63 | FUC X 412 | -20.795 | -10.694 | -19.556 | 1.00 | 0.00 |
| ATOM<br>C | 6358 | C1  | GLC X 413 | -17.800 | -14.920 | -21.958 | 1.00 | 0.00 |
| ATOM<br>H | 6359 | H1  | GLC X 413 | -16.995 | -14.976 | -21.195 | 1.00 | 0.00 |
| ATOM<br>C | 6360 | C5  | GLC X 413 | -16.970 | -16.586 | -23.276 | 1.00 | 0.00 |
| ATOM<br>H | 6361 | H5  | GLC X 413 | -16.213 | -16.845 | -22.506 | 1.00 | 0.00 |
| ATOM<br>O | 6362 | 05  | GLC X 413 | -17.492 | -15.286 | -23.268 | 1.00 | 0.00 |
| ATOM<br>C | 6363 | C2  | GLC X 413 | -18.951 | -15.764 | -21.446 | 1.00 | 0.00 |
| ATOM<br>H | 6364 | H2  | GLC X 413 | -19.750 | -15.456 | -22.154 | 1.00 | 0.00 |
| ATOM<br>N | 6365 | N   | GLC X 413 | -19.345 | -15.456 | -20.111 | 1.00 | 0.00 |
| ATOM<br>H | 6366 | HN  | GLC X 413 | -20.250 | -15.116 | -19.865 | 1.00 | 0.00 |
| ATOM<br>C | 6367 | C   | GLC X 413 | -18.689 | -15.668 | -18.997 | 1.00 | 0.00 |
| ATOM<br>O | 6368 | 0   | GLC X 413 | -17.505 | -15.973 | -18.888 | 1.00 | 0.00 |
| ATOM<br>C | 6369 | CT  | GLC X 413 | -19.461 | -15.336 | -17.734 | 1.00 | 0.00 |
| ATOM<br>H | 6370 | HT1 | GLC X 413 | -18.801 | -15.514 | -16.858 | 1.00 | 0.00 |
| ATOM<br>H | 6371 | HT2 | GLC X 413 | -20.413 | -15.894 | -17.602 | 1.00 | 0.00 |
| ATOM<br>H | 6372 | HT3 | GLC X 413 | -19.750 | -14.264 | -17.764 | 1.00 | 0.00 |
| ATOM<br>C | 6373 | C3  | GLC X 413 | -18.739 | -17.261 | -21.742 | 1.00 | 0.00 |
| ATOM<br>H | 6374 | H3  | GLC X 413 | -18.109 | -17.723 | -20.951 | 1.00 | 0.00 |
| ATOM<br>O | 6375 | 03  | GLC X 413 | -19.970 | -17.930 | -21.521 | 1.00 | 0.00 |

|           |      |     |     |   |     |         |         |         |      |      |
|-----------|------|-----|-----|---|-----|---------|---------|---------|------|------|
| ATOM<br>H | 6376 | H03 | GLC | X | 413 | -19.801 | -18.863 | -21.668 | 1.00 | 0.00 |
| ATOM<br>C | 6377 | C4  | GLC | X | 413 | -18.166 | -17.482 | -23.064 | 1.00 | 0.00 |
| ATOM<br>H | 6378 | H4  | GLC | X | 413 | -18.924 | -17.280 | -23.851 | 1.00 | 0.00 |
| ATOM<br>O | 6379 | O4  | GLC | X | 413 | -17.723 | -18.860 | -23.142 | 1.00 | 0.00 |
| ATOM<br>C | 6380 | C6  | GLC | X | 413 | -16.353 | -16.847 | -24.628 | 1.00 | 0.00 |
| ATOM<br>H | 6381 | H61 | GLC | X | 413 | -17.185 | -16.683 | -25.346 | 1.00 | 0.00 |
| ATOM<br>H | 6382 | H62 | GLC | X | 413 | -16.039 | -17.909 | -24.721 | 1.00 | 0.00 |
| ATOM<br>O | 6383 | O6  | GLC | X | 413 | -15.251 | -16.009 | -25.018 | 1.00 | 0.00 |
| ATOM<br>H | 6384 | H06 | GLC | X | 413 | -14.861 | -16.506 | -25.741 | 1.00 | 0.00 |
| ATOM<br>C | 6385 | C1  | MAN | X | 414 | -18.729 | -19.717 | -23.711 | 1.00 | 0.00 |
| ATOM<br>H | 6386 | H1  | MAN | X | 414 | -19.227 | -19.287 | -24.606 | 1.00 | 0.00 |
| ATOM<br>C | 6387 | C5  | MAN | X | 414 | -20.596 | -21.155 | -23.303 | 1.00 | 0.00 |
| ATOM<br>H | 6388 | H5  | MAN | X | 414 | -21.095 | -20.677 | -24.173 | 1.00 | 0.00 |
| ATOM<br>O | 6389 | O5  | MAN | X | 414 | -19.668 | -20.206 | -22.761 | 1.00 | 0.00 |
| ATOM<br>C | 6390 | C2  | MAN | X | 414 | -17.906 | -20.954 | -24.174 | 1.00 | 0.00 |
| ATOM<br>H | 6391 | H2  | MAN | X | 414 | -17.177 | -20.509 | -24.884 | 1.00 | 0.00 |
| ATOM<br>O | 6392 | O2  | MAN | X | 414 | -17.046 | -21.512 | -23.107 | 1.00 | 0.00 |
| ATOM<br>H | 6393 | H02 | MAN | X | 414 | -17.204 | -20.993 | -22.316 | 1.00 | 0.00 |
| ATOM<br>C | 6394 | C3  | MAN | X | 414 | -18.788 | -22.022 | -24.799 | 1.00 | 0.00 |
| ATOM<br>H | 6395 | H3  | MAN | X | 414 | -19.321 | -21.619 | -25.687 | 1.00 | 0.00 |
| ATOM<br>O | 6396 | O3  | MAN | X | 414 | -18.064 | -23.216 | -25.293 | 1.00 | 0.00 |
| ATOM<br>C | 6397 | C4  | MAN | X | 414 | -19.912 | -22.376 | -23.812 | 1.00 | 0.00 |
| ATOM<br>H | 6398 | H4  | MAN | X | 414 | -19.565 | -22.985 | -22.950 | 1.00 | 0.00 |
| ATOM<br>O | 6399 | O4  | MAN | X | 414 | -20.817 | -23.232 | -24.503 | 1.00 | 0.00 |
| ATOM<br>H | 6400 | H04 | MAN | X | 414 | -21.532 | -23.464 | -23.907 | 1.00 | 0.00 |



|           |      |     |     |   |     |         |         |         |      |      |
|-----------|------|-----|-----|---|-----|---------|---------|---------|------|------|
| ATOM<br>C | 6401 | C6  | MAN | X | 414 | -21.727 | -21.240 | -22.253 | 1.00 | 0.00 |
| ATOM<br>H | 6402 | H61 | MAN | X | 414 | -22.486 | -21.948 | -22.648 | 1.00 | 0.00 |
| ATOM<br>H | 6403 | H62 | MAN | X | 414 | -22.158 | -20.230 | -22.088 | 1.00 | 0.00 |
| ATOM<br>O | 6404 | O6  | MAN | X | 414 | -20.988 | -21.794 | -21.164 | 1.00 | 0.00 |
| ATOM<br>C | 6405 | C1  | MAN | X | 415 | -21.309 | -21.285 | -19.871 | 1.00 | 0.00 |
| ATOM<br>H | 6406 | H1  | MAN | X | 415 | -21.499 | -20.190 | -19.884 | 1.00 | 0.00 |
| ATOM<br>C | 6407 | C5  | MAN | X | 415 | -22.373 | -23.344 | -19.402 | 1.00 | 0.00 |
| ATOM<br>H | 6408 | H5  | MAN | X | 415 | -22.375 | -23.630 | -20.475 | 1.00 | 0.00 |
| ATOM<br>O | 6409 | O5  | MAN | X | 415 | -22.381 | -21.954 | -19.180 | 1.00 | 0.00 |
| ATOM<br>C | 6410 | C2  | MAN | X | 415 | -20.033 | -21.692 | -19.110 | 1.00 | 0.00 |
| ATOM<br>H | 6411 | H2  | MAN | X | 415 | -19.181 | -21.154 | -19.578 | 1.00 | 0.00 |
| ATOM<br>O | 6412 | O2  | MAN | X | 415 | -20.115 | -21.298 | -17.735 | 1.00 | 0.00 |
| ATOM<br>C | 6413 | C3  | MAN | X | 415 | -19.811 | -23.142 | -19.266 | 1.00 | 0.00 |
| ATOM<br>H | 6414 | H3  | MAN | X | 415 | -19.710 | -23.424 | -20.336 | 1.00 | 0.00 |
| ATOM<br>O | 6415 | O3  | MAN | X | 415 | -18.600 | -23.500 | -18.638 | 1.00 | 0.00 |
| ATOM<br>H | 6416 | H03 | MAN | X | 415 | -18.649 | -23.576 | -17.682 | 1.00 | 0.00 |
| ATOM<br>C | 6417 | C4  | MAN | X | 415 | -21.093 | -23.807 | -18.715 | 1.00 | 0.00 |
| ATOM<br>H | 6418 | H4  | MAN | X | 415 | -21.198 | -23.539 | -17.642 | 1.00 | 0.00 |
| ATOM<br>O | 6419 | O4  | MAN | X | 415 | -20.998 | -25.232 | -18.822 | 1.00 | 0.00 |
| ATOM<br>H | 6420 | H04 | MAN | X | 415 | -20.238 | -25.532 | -18.317 | 1.00 | 0.00 |
| ATOM<br>C | 6421 | C6  | MAN | X | 415 | -23.632 | -23.847 | -18.715 | 1.00 | 0.00 |
| ATOM<br>H | 6422 | H61 | MAN | X | 415 | -23.681 | -23.474 | -17.669 | 1.00 | 0.00 |
| ATOM<br>H | 6423 | H62 | MAN | X | 415 | -23.612 | -24.951 | -18.587 | 1.00 | 0.00 |
| ATOM<br>O | 6424 | O6  | MAN | X | 415 | -24.875 | -23.506 | -19.342 | 1.00 | 0.00 |
| ATOM<br>H | 6425 | H06 | MAN | X | 415 | -25.021 | -22.559 | -19.409 | 1.00 | 0.00 |

|           |      |     |           |         |         |         |      |      |
|-----------|------|-----|-----------|---------|---------|---------|------|------|
| ATOM<br>C | 6426 | C1  | GLC X 416 | -19.670 | -20.006 | -17.458 | 1.00 | 0.00 |
| ATOM<br>H | 6427 | H1  | GLC X 416 | -19.962 | -19.357 | -18.311 | 1.00 | 0.00 |
| ATOM<br>C | 6428 | C5  | GLC X 416 | -17.702 | -18.875 | -16.724 | 1.00 | 0.00 |
| ATOM<br>H | 6429 | H5  | GLC X 416 | -17.933 | -18.143 | -17.527 | 1.00 | 0.00 |
| ATOM<br>O | 6430 | O5  | GLC X 416 | -18.266 | -20.084 | -17.194 | 1.00 | 0.00 |
| ATOM<br>C | 6431 | C2  | GLC X 416 | -20.456 | -19.695 | -16.172 | 1.00 | 0.00 |
| ATOM<br>H | 6432 | H2  | GLC X 416 | -20.169 | -20.327 | -15.305 | 1.00 | 0.00 |
| ATOM<br>N | 6433 | N   | GLC X 416 | -21.927 | -19.900 | -16.195 | 1.00 | 0.00 |
| ATOM<br>H | 6434 | HN  | GLC X 416 | -22.403 | -20.506 | -15.562 | 1.00 | 0.00 |
| ATOM<br>C | 6435 | C   | GLC X 416 | -22.688 | -19.282 | -17.081 | 1.00 | 0.00 |
| ATOM<br>O | 6436 | O   | GLC X 416 | -22.162 | -18.556 | -17.908 | 1.00 | 0.00 |
| ATOM<br>C | 6437 | CT  | GLC X 416 | -24.128 | -19.509 | -17.229 | 1.00 | 0.00 |
| ATOM<br>H | 6438 | HT1 | GLC X 416 | -24.329 | -20.455 | -17.775 | 1.00 | 0.00 |
| ATOM<br>H | 6439 | HT2 | GLC X 416 | -24.705 | -18.618 | -17.557 | 1.00 | 0.00 |
| ATOM<br>H | 6440 | HT3 | GLC X 416 | -24.367 | -19.744 | -16.170 | 1.00 | 0.00 |
| ATOM<br>C | 6441 | C3  | GLC X 416 | -19.974 | -18.378 | -15.643 | 1.00 | 0.00 |
| ATOM<br>H | 6442 | H3  | GLC X 416 | -20.271 | -17.661 | -16.438 | 1.00 | 0.00 |
| ATOM<br>O | 6443 | O3  | GLC X 416 | -20.769 | -17.981 | -14.489 | 1.00 | 0.00 |
| ATOM<br>H | 6444 | H03 | GLC X 416 | -21.193 | -17.129 | -14.620 | 1.00 | 0.00 |
| ATOM<br>C | 6445 | C4  | GLC X 416 | -18.487 | -18.334 | -15.376 | 1.00 | 0.00 |
| ATOM<br>H | 6446 | H4  | GLC X 416 | -18.095 | -18.992 | -14.571 | 1.00 | 0.00 |
| ATOM<br>O | 6447 | O4  | GLC X 416 | -17.982 | -17.030 | -15.079 | 1.00 | 0.00 |
| ATOM<br>H | 6448 | H04 | GLC X 416 | -17.507 | -17.061 | -14.245 | 1.00 | 0.00 |
| ATOM<br>C | 6449 | C6  | GLC X 416 | -16.169 | -19.096 | -16.492 | 1.00 | 0.00 |
| ATOM<br>H | 6450 | H61 | GLC X 416 | -15.972 | -19.737 | -15.606 | 1.00 | 0.00 |

|           |      |     |     |   |     |         |         |         |      |      |
|-----------|------|-----|-----|---|-----|---------|---------|---------|------|------|
| ATOM<br>H | 6451 | H62 | GLC | X | 416 | -15.778 | -18.068 | -16.338 | 1.00 | 0.00 |
| ATOM<br>O | 6452 | 06  | GLC | X | 416 | -15.592 | -19.659 | -17.677 | 1.00 | 0.00 |
| ATOM<br>H | 6453 | H06 | GLC | X | 416 | -15.801 | -20.595 | -17.684 | 1.00 | 0.00 |
| ATOM<br>C | 6454 | C1  | MAN | X | 417 | -17.704 | -23.283 | -26.687 | 1.00 | 0.00 |
| ATOM<br>H | 6455 | H1  | MAN | X | 417 | -18.514 | -22.862 | -27.320 | 1.00 | 0.00 |
| ATOM<br>C | 6456 | C5  | MAN | X | 417 | -15.443 | -23.116 | -25.996 | 1.00 | 0.00 |
| ATOM<br>H | 6457 | H5  | MAN | X | 417 | -15.772 | -23.107 | -24.935 | 1.00 | 0.00 |
| ATOM<br>O | 6458 | 05  | MAN | X | 417 | -16.461 | -22.571 | -26.840 | 1.00 | 0.00 |
| ATOM<br>C | 6459 | C2  | MAN | X | 417 | -17.511 | -24.705 | -27.043 | 1.00 | 0.00 |
| ATOM<br>H | 6460 | H2  | MAN | X | 417 | -18.376 | -25.279 | -26.646 | 1.00 | 0.00 |
| ATOM<br>O | 6461 | 02  | MAN | X | 417 | -17.241 | -24.963 | -28.464 | 1.00 | 0.00 |
| ATOM<br>C | 6462 | C3  | MAN | X | 417 | -16.360 | -25.286 | -26.237 | 1.00 | 0.00 |
| ATOM<br>H | 6463 | H3  | MAN | X | 417 | -16.541 | -25.157 | -25.148 | 1.00 | 0.00 |
| ATOM<br>O | 6464 | 03  | MAN | X | 417 | -16.179 | -26.705 | -26.264 | 1.00 | 0.00 |
| ATOM<br>H | 6465 | H03 | MAN | X | 417 | -16.351 | -27.006 | -27.159 | 1.00 | 0.00 |
| ATOM<br>C | 6466 | C4  | MAN | X | 417 | -15.100 | -24.535 | -26.462 | 1.00 | 0.00 |
| ATOM<br>H | 6467 | H4  | MAN | X | 417 | -14.855 | -24.345 | -27.529 | 1.00 | 0.00 |
| ATOM<br>O | 6468 | 04  | MAN | X | 417 | -13.960 | -24.849 | -25.674 | 1.00 | 0.00 |
| ATOM<br>C | 6469 | C6  | MAN | X | 417 | -14.288 | -22.066 | -26.134 | 1.00 | 0.00 |
| ATOM<br>H | 6470 | H61 | MAN | X | 417 | -13.810 | -22.134 | -27.135 | 1.00 | 0.00 |
| ATOM<br>H | 6471 | H62 | MAN | X | 417 | -13.420 | -22.168 | -25.449 | 1.00 | 0.00 |
| ATOM<br>O | 6472 | 06  | MAN | X | 417 | -14.706 | -20.688 | -25.932 | 1.00 | 0.00 |
| ATOM<br>H | 6473 | H06 | MAN | X | 417 | -15.034 | -20.406 | -26.789 | 1.00 | 0.00 |
| ATOM<br>C | 6474 | C1  | GLC | X | 418 | -12.937 | -25.678 | -26.129 | 1.00 | 0.00 |
| ATOM<br>H | 6475 | H1  | GLC | X | 418 | -12.716 | -25.665 | -27.218 | 1.00 | 0.00 |

|           |      |     |           |         |         |         |      |      |
|-----------|------|-----|-----------|---------|---------|---------|------|------|
| ATOM<br>C | 6476 | C5  | GLC X 418 | -12.575 | -27.941 | -26.524 | 1.00 | 0.00 |
| ATOM<br>H | 6477 | H5  | GLC X 418 | -12.583 | -27.576 | -27.573 | 1.00 | 0.00 |
| ATOM<br>O | 6478 | O5  | GLC X 418 | -13.274 | -26.964 | -25.778 | 1.00 | 0.00 |
| ATOM<br>C | 6479 | C2  | GLC X 418 | -11.624 | -25.463 | -25.388 | 1.00 | 0.00 |
| ATOM<br>H | 6480 | H2  | GLC X 418 | -11.775 | -25.701 | -24.313 | 1.00 | 0.00 |
| ATOM<br>N | 6481 | N   | GLC X 418 | -11.215 | -24.100 | -25.520 | 1.00 | 0.00 |
| ATOM<br>H | 6482 | HN  | GLC X 418 | -11.109 | -23.587 | -24.671 | 1.00 | 0.00 |
| ATOM<br>C | 6483 | C   | GLC X 418 | -10.757 | -23.488 | -26.616 | 1.00 | 0.00 |
| ATOM<br>O | 6484 | O   | GLC X 418 | -10.643 | -24.042 | -27.696 | 1.00 | 0.00 |
| ATOM<br>C | 6485 | CT  | GLC X 418 | -10.229 | -22.145 | -26.468 | 1.00 | 0.00 |
| ATOM<br>H | 6486 | HT1 | GLC X 418 | -9.165  | -22.280 | -26.181 | 1.00 | 0.00 |
| ATOM<br>H | 6487 | HT2 | GLC X 418 | -10.678 | -21.568 | -25.632 | 1.00 | 0.00 |
| ATOM<br>H | 6488 | HT3 | GLC X 418 | -10.522 | -21.594 | -27.387 | 1.00 | 0.00 |
| ATOM<br>C | 6489 | C3  | GLC X 418 | -10.592 | -26.444 | -25.883 | 1.00 | 0.00 |
| ATOM<br>H | 6490 | H3  | GLC X 418 | -10.284 | -26.225 | -26.927 | 1.00 | 0.00 |
| ATOM<br>O | 6491 | O3  | GLC X 418 | -9.407  | -26.256 | -25.159 | 1.00 | 0.00 |
| ATOM<br>H | 6492 | H03 | GLC X 418 | -8.818  | -25.984 | -25.866 | 1.00 | 0.00 |
| ATOM<br>C | 6493 | C4  | GLC X 418 | -11.219 | -27.833 | -25.949 | 1.00 | 0.00 |
| ATOM<br>H | 6494 | H4  | GLC X 418 | -11.311 | -28.114 | -24.878 | 1.00 | 0.00 |
| ATOM<br>O | 6495 | O4  | GLC X 418 | -10.306 | -28.772 | -26.514 | 1.00 | 0.00 |
| ATOM<br>H | 6496 | H04 | GLC X 418 | -9.816  | -29.261 | -25.849 | 1.00 | 0.00 |
| ATOM<br>C | 6497 | C6  | GLC X 418 | -13.314 | -29.202 | -26.549 | 1.00 | 0.00 |
| ATOM<br>H | 6498 | H61 | GLC X 418 | -12.628 | -30.035 | -26.815 | 1.00 | 0.00 |
| ATOM<br>H | 6499 | H62 | GLC X 418 | -14.092 | -29.264 | -27.339 | 1.00 | 0.00 |
| ATOM<br>O | 6500 | O6  | GLC X 418 | -13.788 | -29.596 | -25.256 | 1.00 | 0.00 |

|           |      |     |     |   |     |         |         |         |      |      |
|-----------|------|-----|-----|---|-----|---------|---------|---------|------|------|
| ATOM<br>H | 6501 | H06 | GLC | X | 418 | -14.529 | -29.018 | -25.058 | 1.00 | 0.00 |
| ATOM<br>C | 6502 | C1  | GLC | X | 419 | -18.470 | -25.115 | -29.181 | 1.00 | 0.00 |
| ATOM<br>H | 6503 | H1  | GLC | X | 419 | -19.206 | -24.340 | -28.878 | 1.00 | 0.00 |
| ATOM<br>C | 6504 | C5  | GLC | X | 419 | -20.127 | -26.567 | -29.952 | 1.00 | 0.00 |
| ATOM<br>H | 6505 | H5  | GLC | X | 419 | -20.840 | -25.800 | -29.583 | 1.00 | 0.00 |
| ATOM<br>O | 6506 | O5  | GLC | X | 419 | -18.934 | -26.455 | -29.170 | 1.00 | 0.00 |
| ATOM<br>C | 6507 | C2  | GLC | X | 419 | -18.094 | -24.843 | -30.613 | 1.00 | 0.00 |
| ATOM<br>H | 6508 | H2  | GLC | X | 419 | -17.282 | -25.561 | -30.856 | 1.00 | 0.00 |
| ATOM<br>N | 6509 | N   | GLC | X | 419 | -17.413 | -23.554 | -30.804 | 1.00 | 0.00 |
| ATOM<br>H | 6510 | HN  | GLC | X | 419 | -16.473 | -23.641 | -31.125 | 1.00 | 0.00 |
| ATOM<br>C | 6511 | C   | GLC | X | 419 | -18.030 | -22.361 | -30.700 | 1.00 | 0.00 |
| ATOM<br>O | 6512 | O   | GLC | X | 419 | -19.209 | -22.279 | -30.257 | 1.00 | 0.00 |
| ATOM<br>C | 6513 | CT  | GLC | X | 419 | -17.221 | -21.212 | -31.081 | 1.00 | 0.00 |
| ATOM<br>H | 6514 | HT1 | GLC | X | 419 | -16.851 | -20.796 | -30.120 | 1.00 | 0.00 |
| ATOM<br>H | 6515 | HT2 | GLC | X | 419 | -17.846 | -20.394 | -31.499 | 1.00 | 0.00 |
| ATOM<br>H | 6516 | HT3 | GLC | X | 419 | -16.375 | -21.387 | -31.781 | 1.00 | 0.00 |
| ATOM<br>C | 6517 | C3  | GLC | X | 419 | -19.251 | -25.065 | -31.531 | 1.00 | 0.00 |
| ATOM<br>H | 6518 | H3  | GLC | X | 419 | -20.069 | -24.380 | -31.219 | 1.00 | 0.00 |
| ATOM<br>O | 6519 | O3  | GLC | X | 419 | -18.931 | -24.815 | -32.881 | 1.00 | 0.00 |
| ATOM<br>H | 6520 | H03 | GLC | X | 419 | -18.973 | -23.903 | -33.177 | 1.00 | 0.00 |
| ATOM<br>C | 6521 | C4  | GLC | X | 419 | -19.694 | -26.513 | -31.379 | 1.00 | 0.00 |
| ATOM<br>H | 6522 | H4  | GLC | X | 419 | -18.747 | -27.071 | -31.540 | 1.00 | 0.00 |
| ATOM<br>O | 6523 | O4  | GLC | X | 419 | -20.743 | -26.961 | -32.213 | 1.00 | 0.00 |
| ATOM<br>H | 6524 | H04 | GLC | X | 419 | -20.358 | -27.080 | -33.084 | 1.00 | 0.00 |
| ATOM<br>C | 6525 | C6  | GLC | X | 419 | -20.593 | -28.001 | -29.556 | 1.00 | 0.00 |
