# Supplementary material for: Identification and mechanistic basis of non-ACE2 blocking neutralizing antibodies from COVID-19 patients with deep RNA sequencing and molecular dynamics simulations
Source: PubMed Central journal article supplement (PMC9800910; doi:10.3389/fmolb.2022.1080964), 2022-12-16
Supplement: DataSheet5.pdf [file DataSheet5.pdf]

|           |       |     |     |   |   |         |         |         |            |
|-----------|-------|-----|-----|---|---|---------|---------|---------|------------|
| ATOM<br>N | 31200 | N   | GLN | H | 1 | 140.726 | 136.667 | 218.018 | 1.00481.07 |
| ATOM<br>C | 31201 | CA  | GLN | H | 1 | 141.321 | 136.802 | 216.656 | 1.00461.16 |
| ATOM<br>C | 31202 | CB  | GLN | H | 1 | 141.311 | 135.453 | 215.930 | 1.00498.67 |
| ATOM<br>C | 31203 | CG  | GLN | H | 1 | 142.081 | 135.456 | 214.615 | 1.00520.94 |
| ATOM<br>C | 31204 | CD  | GLN | H | 1 | 141.934 | 134.177 | 213.822 | 1.00535.06 |
| ATOM<br>O | 31205 | OE1 | GLN | H | 1 | 141.361 | 133.193 | 214.285 | 1.00538.06 |
| ATOM<br>N | 31206 | NE2 | GLN | H | 1 | 142.461 | 134.185 | 212.609 | 1.00556.90 |
| ATOM<br>C | 31207 | C   | GLN | H | 1 | 140.567 | 137.885 | 215.885 | 1.00425.34 |
| ATOM<br>O | 31208 | O   | GLN | H | 1 | 141.013 | 139.031 | 215.834 | 1.00400.10 |
| ATOM<br>N | 31209 | N   | VAL | H | 2 | 139.421 | 137.502 | 215.305 | 1.00391.00 |
| ATOM<br>C | 31210 | CA  | VAL | H | 2 | 138.606 | 138.399 | 214.499 | 1.00361.52 |
| ATOM<br>C | 31211 | CB  | VAL | H | 2 | 138.216 | 137.794 | 213.132 | 1.00313.43 |
| ATOM<br>C | 31212 | CG1 | VAL | H | 2 | 137.335 | 138.737 | 212.320 | 1.00268.87 |
| ATOM<br>C | 31213 | CG2 | VAL | H | 2 | 139.433 | 137.378 | 212.313 | 1.00228.03 |
| ATOM<br>C | 31214 | C   | VAL | H | 2 | 137.384 | 138.825 | 215.314 | 1.00368.19 |
| ATOM<br>O | 31215 | O   | VAL | H | 2 | 136.626 | 137.996 | 215.817 | 1.00314.88 |
| ATOM<br>N | 31216 | N   | GLN | H | 3 | 137.239 | 140.148 | 215.448 | 1.00376.29 |
| ATOM<br>C | 31217 | CA  | GLN | H | 3 | 136.095 | 140.774 | 216.088 | 1.00349.00 |
| ATOM<br>C | 31218 | CB  | GLN | H | 3 | 136.299 | 140.879 | 217.605 | 1.00266.62 |
| ATOM<br>C | 31219 | CG  | GLN | H | 3 | 137.641 | 141.471 | 218.026 | 1.00261.71 |
| ATOM<br>C | 31220 | CD  | GLN | H | 3 | 137.602 | 142.886 | 218.557 | 1.00268.20 |
| ATOM<br>O | 31221 | OE1 | GLN | H | 3 | 136.617 | 143.615 | 218.412 | 1.00260.30 |
| ATOM<br>N | 31222 | NE2 | GLN | H | 3 | 138.697 | 143.285 | 219.190 | 1.00246.43 |
| ATOM<br>C | 31223 | C   | GLN | H | 3 | 135.824 | 142.116 | 215.406 | 1.00379.27 |
| ATOM<br>O | 31224 | O   | GLN | H | 3 | 136.743 | 142.752 | 214.894 | 1.00382.77 |

|           |       |     |     |   |   |         |         |         |            |
|-----------|-------|-----|-----|---|---|---------|---------|---------|------------|
| ATOM<br>N | 31225 | N   | LEU | H | 4 | 134.547 | 142.515 | 215.395 | 1.00395.06 |
| ATOM<br>C | 31226 | CA  | LEU | H | 4 | 134.095 | 143.725 | 214.722 | 1.00336.88 |
| ATOM<br>C | 31227 | CB  | LEU | H | 4 | 133.255 | 143.334 | 213.498 | 1.00364.98 |
| ATOM<br>C | 31228 | CG  | LEU | H | 4 | 133.770 | 142.141 | 212.685 | 1.00402.15 |
| ATOM<br>C | 31229 | CD1 | LEU | H | 4 | 132.751 | 141.683 | 211.655 | 1.00430.71 |
| ATOM<br>C | 31230 | CD2 | LEU | H | 4 | 135.105 | 142.447 | 212.017 | 1.00407.89 |
| ATOM<br>C | 31231 | C   | LEU | H | 4 | 133.311 | 144.585 | 215.712 | 1.00312.18 |
| ATOM<br>O | 31232 | O   | LEU | H | 4 | 132.410 | 144.104 | 216.401 | 1.00350.20 |
| ATOM<br>N | 31233 | N   | VAL | H | 5 | 133.692 | 145.861 | 215.803 | 1.00293.41 |
| ATOM<br>C | 31234 | CA  | VAL | H | 5 | 133.085 | 146.754 | 216.776 | 1.00332.83 |
| ATOM<br>C | 31235 | CB  | VAL | H | 5 | 134.137 | 147.411 | 217.703 | 1.00318.41 |
| ATOM<br>C | 31236 | CG1 | VAL | H | 5 | 133.623 | 148.670 | 218.397 | 1.00310.66 |
| ATOM<br>C | 31237 | CG2 | VAL | H | 5 | 134.697 | 146.429 | 218.737 | 1.00199.07 |
| ATOM<br>C | 31238 | C   | VAL | H | 5 | 132.200 | 147.750 | 216.028 | 1.00351.44 |
| ATOM<br>O | 31239 | O   | VAL | H | 5 | 132.609 | 148.313 | 215.014 | 1.00345.03 |
| ATOM<br>N | 31240 | N   | GLU | H | 6 | 130.969 | 147.906 | 216.531 | 1.00367.15 |
| ATOM<br>C | 31241 | CA  | GLU | H | 6 | 129.988 | 148.829 | 215.983 | 1.00362.47 |
| ATOM<br>C | 31242 | CB  | GLU | H | 6 | 128.667 | 148.095 | 215.738 | 1.00424.22 |
| ATOM<br>C | 31243 | CG  | GLU | H | 6 | 128.764 | 146.987 | 214.698 | 1.00498.22 |
| ATOM<br>C | 31244 | CD  | GLU | H | 6 | 129.334 | 145.659 | 215.174 | 1.00527.61 |
| ATOM<br>O | 31245 | OE1 | GLU | H | 6 | 129.420 | 145.451 | 216.408 | 1.00504.12 |
| ATOM<br>O | 31246 | OE2 | GLU | H | 6 | 129.685 | 144.830 | 214.314 | 1.00578.05 |
| ATOM<br>C | 31247 | C   | GLU | H | 6 | 129.840 | 149.985 | 216.967 | 1.00329.64 |
| ATOM<br>O | 31248 | O   | GLU | H | 6 | 129.840 | 149.762 | 218.178 | 1.00257.21 |
| ATOM<br>N | 31249 | N   | SER | H | 7 | 129.764 | 151.216 | 216.437 | 1.00356.84 |



|           |       |     |     |   |    |         |         |         |            |
|-----------|-------|-----|-----|---|----|---------|---------|---------|------------|
| ATOM<br>C | 31275 | CA  | VAL | H | 12 | 117.637 | 160.300 | 216.138 | 1.00333.23 |
| ATOM<br>C | 31276 | CB  | VAL | H | 12 | 118.718 | 160.061 | 215.064 | 1.00265.37 |
| ATOM<br>C | 31277 | CG1 | VAL | H | 12 | 118.240 | 159.213 | 213.895 | 1.00285.13 |
| ATOM<br>C | 31278 | CG2 | VAL | H | 12 | 119.340 | 161.361 | 214.588 | 1.00200.71 |
| ATOM<br>C | 31279 | C   | VAL | H | 12 | 116.250 | 160.654 | 215.579 | 1.00385.76 |
| ATOM<br>O | 31280 | O   | VAL | H | 12 | 115.298 | 159.901 | 215.780 | 1.00434.53 |
| ATOM<br>N | 31281 | N   | GLN | H | 13 | 116.135 | 161.824 | 214.920 | 1.00384.26 |
| ATOM<br>C | 31282 | CA  | GLN | H | 13 | 114.870 | 162.375 | 214.431 | 1.00349.51 |
| ATOM<br>C | 31283 | CB  | GLN | H | 13 | 114.817 | 163.895 | 214.638 | 1.00375.99 |
| ATOM<br>C | 31284 | CG  | GLN | H | 13 | 114.654 | 164.354 | 216.086 | 1.00380.40 |
| ATOM<br>C | 31285 | CD  | GLN | H | 13 | 113.246 | 164.286 | 216.635 | 1.00386.46 |
| ATOM<br>O | 31286 | OE1 | GLN | H | 13 | 112.269 | 164.153 | 215.901 | 1.00406.32 |
| ATOM<br>N | 31287 | NE2 | GLN | H | 13 | 113.134 | 164.384 | 217.952 | 1.00322.89 |
| ATOM<br>C | 31288 | C   | GLN | H | 13 | 114.696 | 162.080 | 212.937 | 1.00292.19 |
| ATOM<br>O | 31289 | O   | GLN | H | 13 | 115.671 | 162.152 | 212.188 | 1.00171.32 |
| ATOM<br>N | 31290 | N   | PRO | H | 14 | 113.458 | 161.788 | 212.437 | 1.00303.10 |
| ATOM<br>C | 31291 | CA  | PRO | H | 14 | 113.248 | 161.496 | 211.013 | 1.00286.75 |
| ATOM<br>C | 31292 | CB  | PRO | H | 14 | 111.718 | 161.599 | 210.835 | 1.00251.76 |
| ATOM<br>C | 31293 | CG  | PRO | H | 14 | 111.154 | 161.234 | 212.202 | 1.00240.16 |
| ATOM<br>C | 31294 | CD  | PRO | H | 14 | 112.192 | 161.727 | 213.201 | 1.00271.27 |
| ATOM<br>C | 31295 | C   | PRO | H | 14 | 114.007 | 162.472 | 210.112 | 1.00249.60 |
| ATOM<br>O | 31296 | O   | PRO | H | 14 | 114.280 | 163.601 | 210.505 | 1.00199.92 |
| ATOM<br>N | 31297 | N   | GLY | H | 15 | 114.389 | 162.022 | 208.916 | 1.00275.96 |
| ATOM<br>C | 31298 | CA  | GLY | H | 15 | 115.090 | 162.884 | 207.976 | 1.00272.27 |
| ATOM<br>C | 31299 | C   | GLY | H | 15 | 116.316 | 163.545 | 208.600 | 1.00261.33 |























































































|           |       |      |     |   |     |         |         |         |      |       |
|-----------|-------|------|-----|---|-----|---------|---------|---------|------|-------|
| ATOM<br>O | 32250 | O    | PRO | H | 129 | 103.499 | 149.024 | 241.184 | 1.00 | 45.02 |
| ATOM<br>C | 32251 | CB   | PRO | H | 129 | 105.671 | 149.593 | 243.339 | 1.00 | 55.03 |
| ATOM<br>C | 32252 | CG   | PRO | H | 129 | 104.942 | 150.875 | 243.362 | 1.00 | 49.81 |
| ATOM<br>C | 32253 | CD   | PRO | H | 129 | 105.558 | 151.662 | 242.267 | 1.00 | 53.53 |
| ATOM<br>H | 32254 | HA   | PRO | H | 129 | 106.598 | 148.810 | 241.642 | 1.00 | 65.03 |
| ATOM<br>H | 32255 | HB2  | PRO | H | 129 | 105.173 | 148.894 | 243.789 | 1.00 | 66.06 |
| ATOM<br>H | 32256 | HB3  | PRO | H | 129 | 106.554 | 149.679 | 243.733 | 1.00 | 66.06 |
| ATOM<br>H | 32257 | HG2  | PRO | H | 129 | 103.998 | 150.726 | 243.197 | 1.00 | 59.80 |
| ATOM<br>H | 32258 | HG3  | PRO | H | 129 | 105.065 | 151.314 | 244.218 | 1.00 | 59.80 |
| ATOM<br>H | 32259 | HD2  | PRO | H | 129 | 104.946 | 152.337 | 241.936 | 1.00 | 64.26 |
| ATOM<br>H | 32260 | HD3  | PRO | H | 129 | 106.385 | 152.079 | 242.560 | 1.00 | 64.26 |
| ATOM<br>N | 32261 | N    | LEU | H | 130 | 104.808 | 147.210 | 241.120 | 1.00 | 45.88 |
| ATOM<br>C | 32262 | CA   | LEU | H | 130 | 103.758 | 146.193 | 241.032 | 1.00 | 51.06 |
| ATOM<br>C | 32263 | C    | LEU | H | 130 | 103.777 | 145.476 | 242.400 | 1.00 | 45.45 |
| ATOM<br>O | 32264 | O    | LEU | H | 130 | 104.609 | 144.591 | 242.662 | 1.00 | 49.05 |
| ATOM<br>C | 32265 | CB   | LEU | H | 130 | 104.001 | 145.243 | 239.852 | 1.00 | 46.42 |
| ATOM<br>C | 32266 | CG   | LEU | H | 130 | 104.184 | 145.882 | 238.467 | 1.00 | 41.17 |
| ATOM<br>C | 32267 | CD1  | LEU | H | 130 | 104.751 | 144.874 | 237.450 | 1.00 | 45.33 |
| ATOM<br>C | 32268 | CD2  | LEU | H | 130 | 102.869 | 146.498 | 237.992 | 1.00 | 47.62 |
| ATOM<br>H | 32269 | H    | LEU | H | 130 | 105.595 | 146.887 | 240.991 | 1.00 | 55.08 |
| ATOM<br>H | 32270 | HA   | LEU | H | 130 | 102.885 | 146.593 | 240.883 | 1.00 | 61.30 |
| ATOM<br>H | 32271 | HB2  | LEU | H | 130 | 104.807 | 144.737 | 240.039 | 1.00 | 55.74 |
| ATOM<br>H | 32272 | HB3  | LEU | H | 130 | 103.241 | 144.644 | 239.788 | 1.00 | 55.74 |
| ATOM<br>H | 32273 | HG   | LEU | H | 130 | 104.838 | 146.596 | 238.531 | 1.00 | 49.43 |
| ATOM<br>H | 32274 | HD11 | LEU | H | 130 | 104.839 | 145.311 | 236.589 | 1.00 | 54.42 |















|           |       |      |           |         |         |         |      |       |
|-----------|-------|------|-----------|---------|---------|---------|------|-------|
| ATOM<br>N | 32425 | N    | CYS H 146 | 108.198 | 145.713 | 238.850 | 1.00 | 44.88 |
| ATOM<br>C | 32426 | CA   | CYS H 146 | 108.313 | 147.120 | 238.482 | 1.00 | 53.54 |
| ATOM<br>C | 32427 | C    | CYS H 146 | 107.781 | 147.308 | 237.074 | 1.00 | 49.54 |
| ATOM<br>O | 32428 | O    | CYS H 146 | 108.112 | 146.534 | 236.166 | 1.00 | 48.49 |
| ATOM<br>C | 32429 | CB   | CYS H 146 | 109.773 | 147.594 | 238.578 | 1.00 | 51.93 |
| ATOM<br>S | 32430 | SG   | CYS H 146 | 110.353 | 147.834 | 240.329 | 1.00 | 72.96 |
| ATOM<br>H | 32431 | H    | CYS H 146 | 108.501 | 145.193 | 238.235 | 1.00 | 53.89 |
| ATOM<br>H | 32432 | HA   | CYS H 146 | 107.777 | 147.663 | 239.082 | 1.00 | 64.27 |
| ATOM<br>H | 32433 | HB2  | CYS H 146 | 110.346 | 146.932 | 238.161 | 1.00 | 62.34 |
| ATOM<br>H | 32434 | HB3  | CYS H 146 | 109.859 | 148.444 | 238.117 | 1.00 | 62.34 |
| ATOM<br>N | 32435 | N    | LEU H 147 | 106.923 | 148.303 | 236.913 | 1.00 | 48.59 |
| ATOM<br>C | 32436 | CA   | LEU H 147 | 106.457 | 148.759 | 235.609 | 1.00 | 44.72 |
| ATOM<br>C | 32437 | C    | LEU H 147 | 107.342 | 149.925 | 235.184 | 1.00 | 51.18 |
| ATOM<br>O | 32438 | O    | LEU H 147 | 107.371 | 150.949 | 235.860 | 1.00 | 48.14 |
| ATOM<br>C | 32439 | CB   | LEU H 147 | 105.001 | 149.173 | 235.705 | 1.00 | 46.32 |
| ATOM<br>C | 32440 | CG   | LEU H 147 | 104.328 | 149.656 | 234.447 | 1.00 | 47.72 |
| ATOM<br>C | 32441 | CD1  | LEU H 147 | 104.277 | 148.524 | 233.493 | 1.00 | 54.16 |
| ATOM<br>C | 32442 | CD2  | LEU H 147 | 102.913 | 150.231 | 234.750 | 1.00 | 47.19 |
| ATOM<br>H | 32443 | H    | LEU H 147 | 106.582 | 148.747 | 237.567 | 1.00 | 58.33 |
| ATOM<br>H | 32444 | HA   | LEU H 147 | 106.535 | 148.052 | 234.948 | 1.00 | 53.69 |
| ATOM<br>H | 32445 | HB2  | LEU H 147 | 104.494 | 148.407 | 236.017 | 1.00 | 55.62 |
| ATOM<br>H | 32446 | HB3  | LEU H 147 | 104.940 | 149.896 | 236.349 | 1.00 | 55.62 |
| ATOM<br>H | 32447 | HG   | LEU H 147 | 104.826 | 150.385 | 234.047 | 1.00 | 57.29 |
| ATOM<br>H | 32448 | HD11 | LEU H 147 | 103.688 | 148.758 | 232.758 | 1.00 | 65.02 |
| ATOM<br>H | 32449 | HD12 | LEU H 147 | 105.171 | 148.351 | 233.161 | 1.00 | 65.02 |











































|           |       |      |     |   |     |         |         |         |      |       |
|-----------|-------|------|-----|---|-----|---------|---------|---------|------|-------|
| ATOM<br>H | 32925 | HB3  | SER | H | 179 | 101.629 | 157.694 | 223.752 | 1.00 | 62.95 |
| ATOM<br>H | 32926 | HG   | SER | H | 179 | 103.340 | 156.827 | 224.800 | 1.00 | 68.65 |
| ATOM<br>N | 32927 | N    | GLY | H | 180 | 104.361 | 156.366 | 220.828 | 1.00 | 53.09 |
| ATOM<br>C | 32928 | CA   | GLY | H | 180 | 105.751 | 156.218 | 220.432 | 1.00 | 46.69 |
| ATOM<br>C | 32929 | C    | GLY | H | 180 | 106.696 | 155.887 | 221.560 | 1.00 | 54.74 |
| ATOM<br>O | 32930 | O    | GLY | H | 180 | 107.923 | 155.818 | 221.351 | 1.00 | 46.05 |
| ATOM<br>H | 32931 | H    | GLY | H | 180 | 103.915 | 155.638 | 220.726 | 1.00 | 63.73 |
| ATOM<br>H | 32932 | HA2  | GLY | H | 180 | 105.813 | 155.509 | 219.773 | 1.00 | 56.05 |
| ATOM<br>H | 32933 | HA3  | GLY | H | 180 | 106.050 | 157.049 | 220.029 | 1.00 | 56.05 |
| ATOM<br>N | 32934 | N    | LEU | H | 181 | 106.186 | 155.671 | 222.750 | 1.00 | 55.51 |
| ATOM<br>C | 32935 | CA   | LEU | H | 181 | 107.050 | 155.431 | 223.892 | 1.00 | 51.72 |
| ATOM<br>C | 32936 | C    | LEU | H | 181 | 106.978 | 153.960 | 224.271 | 1.00 | 50.31 |
| ATOM<br>O | 32937 | O    | LEU | H | 181 | 105.960 | 153.306 | 224.045 | 1.00 | 52.37 |
| ATOM<br>C | 32938 | CB   | LEU | H | 181 | 106.630 | 156.333 | 225.035 | 1.00 | 52.73 |
| ATOM<br>C | 32939 | CG   | LEU | H | 181 | 106.673 | 157.831 | 224.745 | 1.00 | 56.52 |
| ATOM<br>C | 32940 | CD1  | LEU | H | 181 | 106.032 | 158.580 | 225.910 | 1.00 | 56.52 |
| ATOM<br>C | 32941 | CD2  | LEU | H | 181 | 108.115 | 158.284 | 224.528 | 1.00 | 51.76 |
| ATOM<br>H | 32942 | H    | LEU | H | 181 | 105.345 | 155.658 | 222.928 | 1.00 | 66.64 |
| ATOM<br>H | 32943 | HA   | LEU | H | 181 | 107.980 | 155.623 | 223.691 | 1.00 | 62.09 |
| ATOM<br>H | 32944 | HB2  | LEU | H | 181 | 105.717 | 156.113 | 225.277 | 1.00 | 63.31 |
| ATOM<br>H | 32945 | HB3  | LEU | H | 181 | 107.220 | 156.167 | 225.788 | 1.00 | 63.31 |
| ATOM<br>H | 32946 | HG   | LEU | H | 181 | 106.181 | 158.035 | 223.936 | 1.00 | 67.85 |
| ATOM<br>H | 32947 | HD11 | LEU | H | 181 | 106.021 | 159.529 | 225.707 | 1.00 | 67.85 |
| ATOM<br>H | 32948 | HD12 | LEU | H | 181 | 105.125 | 158.258 | 226.031 | 1.00 | 67.85 |
| ATOM<br>H | 32949 | HD13 | LEU | H | 181 | 106.551 | 158.420 | 226.713 | 1.00 | 67.85 |



|           |       |      |           |         |         |         |      |       |
|-----------|-------|------|-----------|---------|---------|---------|------|-------|
| ATOM<br>C | 32975 | CA   | SER H 183 | 106.862 | 150.247 | 228.337 | 1.00 | 44.39 |
| ATOM<br>C | 32976 | C    | SER H 183 | 107.257 | 148.781 | 228.467 | 1.00 | 51.32 |
| ATOM<br>O | 32977 | O    | SER H 183 | 107.018 | 147.988 | 227.550 | 1.00 | 49.86 |
| ATOM<br>C | 32978 | CB   | SER H 183 | 105.383 | 150.419 | 228.662 | 1.00 | 58.81 |
| ATOM<br>O | 32979 | OG   | SER H 183 | 105.062 | 149.688 | 229.828 | 1.00 | 66.21 |
| ATOM<br>H | 32980 | H    | SER H 183 | 106.895 | 150.140 | 226.384 | 1.00 | 56.70 |
| ATOM<br>H | 32981 | HA   | SER H 183 | 107.389 | 150.754 | 228.976 | 1.00 | 53.29 |
| ATOM<br>H | 32982 | HB2  | SER H 183 | 105.196 | 151.359 | 228.812 | 1.00 | 70.60 |
| ATOM<br>H | 32983 | HB3  | SER H 183 | 104.852 | 150.088 | 227.920 | 1.00 | 70.60 |
| ATOM<br>H | 32984 | HG   | SER H 183 | 104.256 | 149.810 | 230.030 | 1.00 | 79.47 |
| ATOM<br>N | 32985 | N    | LEU H 184 | 107.869 | 148.411 | 229.597 | 1.00 | 50.22 |
| ATOM<br>C | 32986 | CA   | LEU H 184 | 108.055 | 147.001 | 229.927 | 1.00 | 53.46 |
| ATOM<br>C | 32987 | C    | LEU H 184 | 107.792 | 146.744 | 231.405 | 1.00 | 58.23 |
| ATOM<br>O | 32988 | O    | LEU H 184 | 107.715 | 147.664 | 232.226 | 1.00 | 48.73 |
| ATOM<br>C | 32989 | CB   | LEU H 184 | 109.463 | 146.486 | 229.596 | 1.00 | 47.95 |
| ATOM<br>C | 32990 | CG   | LEU H 184 | 110.690 | 146.923 | 230.382 | 1.00 | 53.77 |
| ATOM<br>C | 32991 | CD1  | LEU H 184 | 110.797 | 146.285 | 231.735 | 1.00 | 45.26 |
| ATOM<br>C | 32992 | CD2  | LEU H 184 | 111.911 | 146.587 | 229.563 | 1.00 | 53.22 |
| ATOM<br>H | 32993 | H    | LEU H 184 | 108.183 | 148.959 | 230.182 | 1.00 | 60.29 |
| ATOM<br>H | 32994 | HA   | LEU H 184 | 107.401 | 146.518 | 229.398 | 1.00 | 64.18 |
| ATOM<br>H | 32995 | HB2  | LEU H 184 | 109.432 | 145.519 | 229.679 | 1.00 | 57.57 |
| ATOM<br>H | 32996 | HB3  | LEU H 184 | 109.641 | 146.734 | 228.675 | 1.00 | 57.57 |
| ATOM<br>H | 32997 | HG   | LEU H 184 | 110.624 | 147.877 | 230.550 | 1.00 | 64.55 |
| ATOM<br>H | 32998 | HD11 | LEU H 184 | 111.726 | 146.294 | 232.017 | 1.00 | 54.34 |
| ATOM<br>H | 32999 | HD12 | LEU H 184 | 110.256 | 146.787 | 232.364 | 1.00 | 54.34 |





|           |       |      |           |         |         |         |      |       |
|-----------|-------|------|-----------|---------|---------|---------|------|-------|
| ATOM<br>H | 33025 | HG   | SER H 186 | 112.551 | 142.365 | 235.566 | 1.00 | 58.98 |
| ATOM<br>N | 33026 | N    | VAL H 187 | 109.348 | 141.255 | 236.787 | 1.00 | 44.56 |
| ATOM<br>C | 33027 | CA   | VAL H 187 | 108.680 | 140.586 | 237.893 | 1.00 | 44.79 |
| ATOM<br>C | 33028 | C    | VAL H 187 | 109.573 | 139.517 | 238.482 | 1.00 | 44.10 |
| ATOM<br>O | 33029 | O    | VAL H 187 | 110.456 | 138.972 | 237.818 | 1.00 | 46.68 |
| ATOM<br>C | 33030 | CB   | VAL H 187 | 107.350 | 139.900 | 237.505 | 1.00 | 47.64 |
| ATOM<br>C | 33031 | CG1  | VAL H 187 | 106.399 | 140.883 | 237.040 | 1.00 | 45.73 |
| ATOM<br>C | 33032 | CG2  | VAL H 187 | 107.626 | 138.749 | 236.458 | 1.00 | 45.97 |
| ATOM<br>H | 33033 | H    | VAL H 187 | 109.736 | 140.714 | 236.243 | 1.00 | 53.50 |
| ATOM<br>H | 33034 | HA   | VAL H 187 | 108.514 | 141.279 | 238.552 | 1.00 | 53.77 |
| ATOM<br>H | 33035 | HB   | VAL H 187 | 106.945 | 139.479 | 238.281 | 1.00 | 57.19 |
| ATOM<br>H | 33036 | HG11 | VAL H 187 | 105.553 | 140.444 | 236.862 | 1.00 | 54.90 |
| ATOM<br>H | 33037 | HG12 | VAL H 187 | 106.284 | 141.561 | 237.724 | 1.00 | 54.90 |
| ATOM<br>H | 33038 | HG13 | VAL H 187 | 106.739 | 141.289 | 236.226 | 1.00 | 54.90 |
| ATOM<br>H | 33039 | HG21 | VAL H 187 | 106.779 | 138.409 | 236.130 | 1.00 | 55.19 |
| ATOM<br>H | 33040 | HG22 | VAL H 187 | 108.145 | 139.109 | 235.722 | 1.00 | 55.19 |
| ATOM<br>H | 33041 | HG23 | VAL H 187 | 108.122 | 138.037 | 236.893 | 1.00 | 55.19 |
| ATOM<br>N | 33042 | N    | VAL H 188 | 109.263 | 139.159 | 239.738 | 1.00 | 47.16 |
| ATOM<br>C | 33043 | CA   | VAL H 188 | 109.948 | 138.069 | 240.433 | 1.00 | 46.15 |
| ATOM<br>C | 33044 | C    | VAL H 188 | 108.929 | 137.419 | 241.346 | 1.00 | 44.80 |
| ATOM<br>O | 33045 | O    | VAL H 188 | 108.065 | 138.093 | 241.927 | 1.00 | 44.74 |
| ATOM<br>C | 33046 | CB   | VAL H 188 | 111.193 | 138.565 | 241.203 | 1.00 | 42.75 |
| ATOM<br>C | 33047 | CG1  | VAL H 188 | 110.795 | 139.586 | 242.208 | 1.00 | 56.89 |
| ATOM<br>C | 33048 | CG2  | VAL H 188 | 111.915 | 137.412 | 241.888 | 1.00 | 47.85 |
| ATOM<br>H | 33049 | H    | VAL H 188 | 108.653 | 139.540 | 240.209 | 1.00 | 56.61 |





|           |       |     |     |   |     |         |         |         |      |       |
|-----------|-------|-----|-----|---|-----|---------|---------|---------|------|-------|
| ATOM<br>H | 33100 | HD2 | PRO | H | 191 | 110.889 | 134.119 | 248.754 | 1.00 | 56.07 |
| ATOM<br>H | 33101 | HD3 | PRO | H | 191 | 110.876 | 133.069 | 247.560 | 1.00 | 56.07 |
| ATOM<br>N | 33102 | N   | SER | H | 192 | 106.030 | 134.133 | 249.855 | 1.00 | 42.43 |
| ATOM<br>C | 33103 | CA  | SER | H | 192 | 105.262 | 135.257 | 250.365 | 1.00 | 44.64 |
| ATOM<br>C | 33104 | C   | SER | H | 192 | 105.665 | 135.608 | 251.788 | 1.00 | 49.22 |
| ATOM<br>O | 33105 | O   | SER | H | 192 | 105.570 | 136.778 | 252.174 | 1.00 | 49.77 |
| ATOM<br>C | 33106 | CB  | SER | H | 192 | 103.762 | 134.982 | 250.272 | 1.00 | 50.96 |
| ATOM<br>O | 33107 | OG  | SER | H | 192 | 103.505 | 133.634 | 250.061 | 1.00 | 71.68 |
| ATOM<br>H | 33108 | H   | SER | H | 192 | 105.583 | 133.428 | 249.648 | 1.00 | 50.95 |
| ATOM<br>H | 33109 | HA  | SER | H | 192 | 105.441 | 136.029 | 249.807 | 1.00 | 53.59 |
| ATOM<br>H | 33110 | HB2 | SER | H | 192 | 103.342 | 135.256 | 251.101 | 1.00 | 61.18 |
| ATOM<br>H | 33111 | HB3 | SER | H | 192 | 103.397 | 135.491 | 249.530 | 1.00 | 61.18 |
| ATOM<br>H | 33112 | HG  | SER | H | 192 | 102.698 | 133.467 | 250.228 | 1.00 | 86.05 |
| ATOM<br>N | 33113 | N   | SER | H | 193 | 106.133 | 134.623 | 252.583 | 1.00 | 51.30 |
| ATOM<br>C | 33114 | CA  | SER | H | 193 | 106.572 | 134.915 | 253.946 | 1.00 | 50.02 |
| ATOM<br>C | 33115 | C   | SER | H | 193 | 107.842 | 135.745 | 253.971 | 1.00 | 47.73 |
| ATOM<br>O | 33116 | O   | SER | H | 193 | 108.184 | 136.310 | 255.019 | 1.00 | 47.20 |
| ATOM<br>C | 33117 | CB  | SER | H | 193 | 106.806 | 133.626 | 254.726 | 1.00 | 49.37 |
| ATOM<br>O | 33118 | OG  | SER | H | 193 | 107.825 | 132.842 | 254.145 | 1.00 | 44.73 |
| ATOM<br>H | 33119 | H   | SER | H | 193 | 106.202 | 133.796 | 252.354 | 1.00 | 61.59 |
| ATOM<br>H | 33120 | HA  | SER | H | 193 | 105.866 | 135.411 | 254.389 | 1.00 | 60.05 |
| ATOM<br>H | 33121 | HB2 | SER | H | 193 | 107.065 | 133.853 | 255.633 | 1.00 | 59.28 |
| ATOM<br>H | 33122 | HB3 | SER | H | 193 | 105.983 | 133.114 | 254.734 | 1.00 | 59.28 |
| ATOM<br>H | 33123 | HG  | SER | H | 193 | 107.900 | 132.115 | 254.560 | 1.00 | 53.70 |
| ATOM<br>N | 33124 | N   | SER | H | 194 | 108.553 | 135.828 | 252.847 | 1.00 | 45.14 |















































|           |       |     |     |   |    |         |         |         |            |
|-----------|-------|-----|-----|---|----|---------|---------|---------|------------|
| ATOM<br>C | 33625 | CA  | SER | L | 7  | 109.113 | 125.145 | 205.399 | 1.00252.29 |
| ATOM<br>C | 33626 | CB  | SER | L | 7  | 109.117 | 124.426 | 204.024 | 1.00251.80 |
| ATOM<br>O | 33627 | OG  | SER | L | 7  | 110.074 | 124.733 | 202.979 | 1.00268.47 |
| ATOM<br>C | 33628 | C   | SER | L | 7  | 109.630 | 124.061 | 206.327 | 1.00288.56 |
| ATOM<br>O | 33629 | O   | SER | L | 7  | 110.556 | 123.349 | 205.950 | 1.00346.43 |
| ATOM<br>N | 33630 | N   | PRO | L | 8  | 109.090 | 123.864 | 207.543 | 1.00306.38 |
| ATOM<br>C | 33631 | CA  | PRO | L | 8  | 107.961 | 124.645 | 208.029 | 1.00300.85 |
| ATOM<br>C | 33632 | CB  | PRO | L | 8  | 107.455 | 123.799 | 209.203 | 1.00321.39 |
| ATOM<br>C | 33633 | CG  | PRO | L | 8  | 108.697 | 123.114 | 209.733 | 1.00307.31 |
| ATOM<br>C | 33634 | CD  | PRO | L | 8  | 109.573 | 122.877 | 208.521 | 1.00320.52 |
| ATOM<br>C | 33635 | C   | PRO | L | 8  | 108.453 | 125.983 | 208.557 | 1.00291.81 |
| ATOM<br>O | 33636 | O   | PRO | L | 8  | 109.620 | 126.123 | 208.921 | 1.00277.80 |
| ATOM<br>N | 33637 | N   | SER | L | 9  | 107.534 | 126.947 | 208.579 | 1.00281.19 |
| ATOM<br>C | 33638 | CA  | SER | L | 9  | 107.769 | 128.267 | 209.136 | 1.00303.50 |
| ATOM<br>C | 33639 | CB  | SER | L | 9  | 106.573 | 129.111 | 208.854 | 1.00290.80 |
| ATOM<br>O | 33640 | OG  | SER | L | 9  | 105.432 | 128.274 | 208.729 | 1.00271.99 |
| ATOM<br>C | 33641 | C   | SER | L | 9  | 108.028 | 128.164 | 210.637 | 1.00319.61 |
| ATOM<br>O | 33642 | O   | SER | L | 9  | 108.892 | 128.856 | 211.172 | 1.00306.31 |
| ATOM<br>N | 33643 | N   | THR | L | 10 | 107.251 | 127.303 | 211.301 | 1.00343.36 |
| ATOM<br>C | 33644 | CA  | THR | L | 10 | 107.434 | 126.991 | 212.709 | 1.00343.42 |
| ATOM<br>C | 33645 | CB  | THR | L | 10 | 106.276 | 127.551 | 213.554 | 1.00348.24 |
| ATOM<br>O | 33646 | OG1 | THR | L | 10 | 106.109 | 128.951 | 213.320 | 1.00322.00 |
| ATOM<br>C | 33647 | CG2 | THR | L | 10 | 106.454 | 127.328 | 215.041 | 1.00326.14 |
| ATOM<br>C | 33648 | C   | THR | L | 10 | 107.647 | 125.481 | 212.828 | 1.00333.55 |
| ATOM<br>O | 33649 | O   | THR | L | 10 | 106.904 | 124.700 | 212.230 | 1.00282.81 |





|           |       |     |     |   |    |         |         |         |            |
|-----------|-------|-----|-----|---|----|---------|---------|---------|------------|
| ATOM<br>C | 33700 | CZ  | ARG | L | 18 | 116.851 | 113.612 | 208.973 | 1.00342.78 |
| ATOM<br>N | 33701 | NH1 | ARG | L | 18 | 115.674 | 113.894 | 209.507 | 1.00353.29 |
| ATOM<br>N | 33702 | NH2 | ARG | L | 18 | 117.101 | 113.956 | 207.722 | 1.00362.42 |
| ATOM<br>C | 33703 | C   | ARG | L | 18 | 115.754 | 115.765 | 213.355 | 1.00350.09 |
| ATOM<br>O | 33704 | O   | ARG | L | 18 | 114.726 | 115.294 | 212.855 | 1.00272.75 |
| ATOM<br>N | 33705 | N   | VAL | L | 19 | 116.081 | 117.063 | 213.254 | 1.00362.36 |
| ATOM<br>C | 33706 | CA  | VAL | L | 19 | 115.166 | 118.063 | 212.721 | 1.00310.61 |
| ATOM<br>C | 33707 | CB  | VAL | L | 19 | 115.148 | 119.332 | 213.596 | 1.00349.50 |
| ATOM<br>C | 33708 | CG1 | VAL | L | 19 | 114.317 | 120.440 | 212.965 | 1.00355.03 |
| ATOM<br>C | 33709 | CG2 | VAL | L | 19 | 114.641 | 119.027 | 214.998 | 1.00318.95 |
| ATOM<br>C | 33710 | C   | VAL | L | 19 | 115.502 | 118.368 | 211.259 | 1.00271.21 |
| ATOM<br>O | 33711 | O   | VAL | L | 19 | 116.648 | 118.227 | 210.825 | 1.00236.40 |
| ATOM<br>N | 33712 | N   | THR | L | 20 | 114.479 | 118.786 | 210.502 | 1.00236.38 |
| ATOM<br>C | 33713 | CA  | THR | L | 20 | 114.653 | 119.081 | 209.087 | 1.00265.64 |
| ATOM<br>C | 33714 | CB  | THR | L | 20 | 114.163 | 117.918 | 208.206 | 1.00274.01 |
| ATOM<br>O | 33715 | OG1 | THR | L | 20 | 114.819 | 116.725 | 208.631 | 1.00283.36 |
| ATOM<br>C | 33716 | CG2 | THR | L | 20 | 114.425 | 118.107 | 206.727 | 1.00237.73 |
| ATOM<br>C | 33717 | C   | THR | L | 20 | 114.025 | 120.431 | 208.736 | 1.00241.46 |
| ATOM<br>O | 33718 | O   | THR | L | 20 | 112.813 | 120.610 | 208.824 | 1.00219.80 |
| ATOM<br>N | 33719 | N   | ILE | L | 21 | 114.868 | 121.378 | 208.312 | 1.00223.17 |
| ATOM<br>C | 33720 | CA  | ILE | L | 21 | 114.391 | 122.634 | 207.757 | 1.00228.13 |
| ATOM<br>C | 33721 | CB  | ILE | L | 21 | 114.956 | 123.854 | 208.534 | 1.00274.30 |
| ATOM<br>C | 33722 | CG1 | ILE | L | 21 | 114.909 | 123.695 | 210.057 | 1.00287.73 |
| ATOM<br>C | 33723 | CG2 | ILE | L | 21 | 114.286 | 125.154 | 208.111 | 1.00286.11 |
| ATOM<br>C | 33724 | CD1 | ILE | L | 21 | 115.400 | 124.929 | 210.797 | 1.00269.65 |

|           |       |     |     |   |    |         |         |         |            |
|-----------|-------|-----|-----|---|----|---------|---------|---------|------------|
| ATOM<br>C | 33725 | C   | ILE | L | 21 | 114.738 | 122.655 | 206.260 | 1.00211.60 |
| ATOM<br>O | 33726 | O   | ILE | L | 21 | 115.832 | 122.249 | 205.859 | 1.00157.48 |
| ATOM<br>N | 33727 | N   | THR | L | 22 | 113.790 | 123.144 | 205.442 | 1.00218.23 |
| ATOM<br>C | 33728 | CA  | THR | L | 22 | 113.894 | 123.226 | 203.989 | 1.00194.30 |
| ATOM<br>C | 33729 | CB  | THR | L | 22 | 112.939 | 122.201 | 203.351 | 1.00222.79 |
| ATOM<br>O | 33730 | OG1 | THR | L | 22 | 112.633 | 121.120 | 204.240 | 1.00209.22 |
| ATOM<br>C | 33731 | CG2 | THR | L | 22 | 113.421 | 121.675 | 202.016 | 1.00238.47 |
| ATOM<br>C | 33732 | C   | THR | L | 22 | 113.546 | 124.641 | 203.492 | 1.00202.49 |
| ATOM<br>O | 33733 | O   | THR | L | 22 | 112.476 | 125.164 | 203.797 | 1.00218.06 |
| ATOM<br>N | 33734 | N   | CYS | L | 23 | 114.442 | 125.266 | 202.708 | 1.00192.83 |
| ATOM<br>C | 33735 | CA  | CYS | L | 23 | 114.192 | 126.578 | 202.117 | 1.00192.96 |
| ATOM<br>C | 33736 | CB  | CYS | L | 23 | 115.475 | 127.397 | 202.061 | 1.00203.15 |
| ATOM<br>S | 33737 | SG  | CYS | L | 23 | 115.201 | 129.167 | 201.793 | 1.00236.25 |
| ATOM<br>C | 33738 | C   | CYS | L | 23 | 113.631 | 126.428 | 200.700 | 1.00207.63 |
| ATOM<br>O | 33739 | O   | CYS | L | 23 | 113.729 | 125.362 | 200.101 | 1.00219.09 |
| ATOM<br>N | 33740 | N   | ARG | L | 24 | 113.046 | 127.502 | 200.151 | 1.00231.26 |
| ATOM<br>C | 33741 | CA  | ARG | L | 24 | 112.388 | 127.428 | 198.849 | 1.00228.94 |
| ATOM<br>C | 33742 | CB  | ARG | L | 24 | 110.910 | 127.024 | 198.972 | 1.00236.46 |
| ATOM<br>C | 33743 | CG  | ARG | L | 24 | 110.213 | 126.667 | 197.657 | 1.00251.35 |
| ATOM<br>C | 33744 | CD  | ARG | L | 24 | 110.156 | 125.175 | 197.339 | 1.00234.31 |
| ATOM<br>N | 33745 | NE  | ARG | L | 24 | 110.714 | 124.627 | 198.586 | 1.00280.17 |
| ATOM<br>C | 33746 | CZ  | ARG | L | 24 | 111.190 | 123.399 | 198.747 | 1.00332.30 |
| ATOM<br>N | 33747 | NH1 | ARG | L | 24 | 111.154 | 122.559 | 197.715 | 1.00369.84 |
| ATOM<br>N | 33748 | NH2 | ARG | L | 24 | 111.676 | 122.987 | 199.935 | 1.00374.39 |
| ATOM<br>C | 33749 | C   | ARG | L | 24 | 112.481 | 128.762 | 198.111 | 1.00201.14 |

















|           |       |     |     |   |    |         |         |         |            |
|-----------|-------|-----|-----|---|----|---------|---------|---------|------------|
| ATOM<br>C | 33925 | C   | LEU | L | 46 | 127.266 | 129.730 | 210.402 | 1.00199.02 |
| ATOM<br>O | 33926 | O   | LEU | L | 46 | 127.815 | 129.527 | 211.493 | 1.00126.05 |
| ATOM<br>N | 33927 | N   | LEU | L | 47 | 126.581 | 128.809 | 209.728 | 1.00229.28 |
| ATOM<br>C | 33928 | CA  | LEU | L | 47 | 126.516 | 127.418 | 210.122 | 1.00226.13 |
| ATOM<br>C | 33929 | CB  | LEU | L | 47 | 125.113 | 127.105 | 210.653 | 1.00225.61 |
| ATOM<br>C | 33930 | CG  | LEU | L | 47 | 124.943 | 127.116 | 212.175 | 1.00218.72 |
| ATOM<br>C | 33931 | CD1 | LEU | L | 47 | 125.558 | 128.357 | 212.850 | 1.00149.51 |
| ATOM<br>C | 33932 | CD2 | LEU | L | 47 | 123.473 | 126.935 | 212.548 | 1.00222.29 |
| ATOM<br>C | 33933 | C   | LEU | L | 47 | 126.890 | 126.536 | 208.930 | 1.00244.95 |
| ATOM<br>O | 33934 | O   | LEU | L | 47 | 127.295 | 125.395 | 209.146 | 1.00264.80 |
| ATOM<br>N | 33935 | N   | ILE | L | 48 | 126.762 | 127.061 | 207.689 | 1.00249.25 |
| ATOM<br>C | 33936 | CA  | ILE | L | 48 | 126.991 | 126.315 | 206.448 | 1.00210.85 |
| ATOM<br>C | 33937 | CB  | ILE | L | 48 | 125.751 | 125.470 | 206.037 | 1.00199.30 |
| ATOM<br>C | 33938 | CG1 | ILE | L | 48 | 124.622 | 125.390 | 207.085 | 1.00189.07 |
| ATOM<br>C | 33939 | CG2 | ILE | L | 48 | 126.160 | 124.125 | 205.438 | 1.00167.85 |
| ATOM<br>C | 33940 | CD1 | ILE | L | 48 | 124.748 | 124.320 | 208.162 | 1.00207.74 |
| ATOM<br>C | 33941 | C   | ILE | L | 48 | 127.354 | 127.259 | 205.290 | 1.00169.95 |
| ATOM<br>O | 33942 | O   | ILE | L | 48 | 126.509 | 128.053 | 204.895 | 1.00132.20 |
| ATOM<br>N | 33943 | N   | TYR | L | 49 | 128.557 | 127.112 | 204.686 | 1.00194.62 |
| ATOM<br>C | 33944 | CA  | TYR | L | 49 | 128.968 | 127.774 | 203.436 | 1.00183.38 |
| ATOM<br>C | 33945 | CB  | TYR | L | 49 | 130.406 | 128.333 | 203.497 | 1.00188.64 |
| ATOM<br>C | 33946 | CG  | TYR | L | 49 | 131.529 | 127.334 | 203.275 | 1.00267.83 |
| ATOM<br>C | 33947 | CD1 | TYR | L | 49 | 131.852 | 126.361 | 204.218 | 1.00297.95 |
| ATOM<br>C | 33948 | CE1 | TYR | L | 49 | 132.882 | 125.447 | 204.017 | 1.00299.50 |
| ATOM<br>C | 33949 | CZ  | TYR | L | 49 | 133.623 | 125.485 | 202.846 | 1.00317.37 |



|           |       |     |       |    |         |         |         |            |
|-----------|-------|-----|-------|----|---------|---------|---------|------------|
| ATOM<br>N | 33975 | N   | SER L | 53 | 128.243 | 122.031 | 202.678 | 1.00207.18 |
| ATOM<br>C | 33976 | CA  | SER L | 53 | 129.557 | 121.878 | 203.288 | 1.00204.49 |
| ATOM<br>C | 33977 | CB  | SER L | 53 | 130.645 | 122.480 | 202.388 | 1.00212.23 |
| ATOM<br>O | 33978 | OG  | SER L | 53 | 130.362 | 122.369 | 200.983 | 1.00138.87 |
| ATOM<br>C | 33979 | C   | SER L | 53 | 129.608 | 122.511 | 204.681 | 1.00168.81 |
| ATOM<br>O | 33980 | O   | SER L | 53 | 129.624 | 123.731 | 204.808 | 1.00119.09 |
| ATOM<br>N | 33981 | N   | LEU L | 54 | 129.720 | 121.699 | 205.731 | 1.00176.22 |
| ATOM<br>C | 33982 | CA  | LEU L | 54 | 130.018 | 122.313 | 207.013 | 1.00218.91 |
| ATOM<br>C | 33983 | CB  | LEU L | 54 | 130.671 | 121.288 | 207.951 | 1.00228.11 |
| ATOM<br>C | 33984 | CG  | LEU L | 54 | 130.334 | 121.407 | 209.439 | 1.00236.29 |
| ATOM<br>C | 33985 | CD1 | LEU L | 54 | 128.915 | 121.917 | 209.643 | 1.00273.71 |
| ATOM<br>C | 33986 | CD2 | LEU L | 54 | 130.502 | 120.045 | 210.100 | 1.00196.41 |
| ATOM<br>C | 33987 | C   | LEU L | 54 | 130.906 | 123.548 | 206.803 | 1.00203.94 |
| ATOM<br>O | 33988 | O   | LEU L | 54 | 131.649 | 123.688 | 205.816 | 1.00123.49 |
| ATOM<br>N | 33989 | N   | GLU L | 55 | 130.737 | 124.487 | 207.732 | 1.00227.76 |
| ATOM<br>C | 33990 | CA  | GLU L | 55 | 131.665 | 125.580 | 207.930 | 1.00234.49 |
| ATOM<br>C | 33991 | CB  | GLU L | 55 | 130.877 | 126.895 | 208.007 | 1.00285.23 |
| ATOM<br>C | 33992 | CG  | GLU L | 55 | 131.677 | 128.157 | 207.712 | 1.00304.97 |
| ATOM<br>C | 33993 | CD  | GLU L | 55 | 132.852 | 128.042 | 206.758 | 1.00260.24 |
| ATOM<br>O | 33994 | OE1 | GLU L | 55 | 133.803 | 127.297 | 207.115 | 1.00151.03 |
| ATOM<br>O | 33995 | OE2 | GLU L | 55 | 132.816 | 128.703 | 205.671 | 1.00261.77 |
| ATOM<br>C | 33996 | C   | GLU L | 55 | 132.521 | 125.217 | 209.147 | 1.00230.78 |
| ATOM<br>O | 33997 | O   | GLU L | 55 | 132.183 | 124.296 | 209.908 | 1.00188.30 |
| ATOM<br>N | 33998 | N   | SER L | 56 | 133.642 | 125.932 | 209.299 | 1.00215.61 |
| ATOM<br>C | 33999 | CA  | SER L | 56 | 134.644 | 125.585 | 210.291 | 1.00242.53 |



|           |       |     |     |   |    |         |         |         |            |
|-----------|-------|-----|-----|---|----|---------|---------|---------|------------|
| ATOM<br>C | 34000 | CB  | SER | L | 56 | 136.023 | 125.925 | 209.798 | 1.00240.15 |
| ATOM<br>O | 34001 | OG  | SER | L | 56 | 136.996 | 125.227 | 210.559 | 1.00320.39 |
| ATOM<br>C | 34002 | C   | SER | L | 56 | 134.338 | 126.251 | 211.631 | 1.00234.55 |
| ATOM<br>O | 34003 | O   | SER | L | 56 | 133.937 | 127.412 | 211.683 | 1.00211.58 |
| ATOM<br>N | 34004 | N   | GLY | L | 57 | 134.551 | 125.498 | 212.718 | 1.00237.25 |
| ATOM<br>C | 34005 | CA  | GLY | L | 57 | 134.281 | 125.986 | 214.060 | 1.00242.09 |
| ATOM<br>C | 34006 | C   | GLY | L | 57 | 132.840 | 125.687 | 214.463 | 1.00259.43 |
| ATOM<br>O | 34007 | O   | GLY | L | 57 | 132.466 | 125.900 | 215.619 | 1.00224.99 |
| ATOM<br>N | 34008 | N   | VAL | L | 58 | 132.070 | 125.187 | 213.479 | 1.00271.85 |
| ATOM<br>C | 34009 | CA  | VAL | L | 58 | 130.670 | 124.800 | 213.599 | 1.00271.51 |
| ATOM<br>C | 34010 | CB  | VAL | L | 58 | 129.900 | 124.999 | 212.276 | 1.00239.60 |
| ATOM<br>C | 34011 | CG1 | VAL | L | 58 | 128.775 | 123.989 | 212.098 | 1.00156.13 |
| ATOM<br>C | 34012 | CG2 | VAL | L | 58 | 129.364 | 126.415 | 212.136 | 1.00312.91 |
| ATOM<br>C | 34013 | C   | VAL | L | 58 | 130.614 | 123.336 | 214.023 | 1.00271.31 |
| ATOM<br>O | 34014 | O   | VAL | L | 58 | 131.251 | 122.500 | 213.381 | 1.00222.59 |
| ATOM<br>N | 34015 | N   | PRO | L | 59 | 129.884 | 122.987 | 215.113 | 1.00286.01 |
| ATOM<br>C | 34016 | CA  | PRO | L | 59 | 129.690 | 121.585 | 215.492 | 1.00296.48 |
| ATOM<br>C | 34017 | CB  | PRO | L | 59 | 128.789 | 121.680 | 216.727 | 1.00281.27 |
| ATOM<br>C | 34018 | CG  | PRO | L | 59 | 129.194 | 123.011 | 217.320 | 1.00251.80 |
| ATOM<br>C | 34019 | CD  | PRO | L | 59 | 129.308 | 123.910 | 216.106 | 1.00276.31 |
| ATOM<br>C | 34020 | C   | PRO | L | 59 | 129.107 | 120.734 | 214.366 | 1.00327.10 |
| ATOM<br>O | 34021 | O   | PRO | L | 59 | 128.387 | 121.232 | 213.501 | 1.00360.22 |
| ATOM<br>N | 34022 | N   | SER | L | 60 | 129.441 | 119.439 | 214.398 | 1.00314.82 |
| ATOM<br>C | 34023 | CA  | SER | L | 60 | 129.319 | 118.570 | 213.237 | 1.00280.12 |
| ATOM<br>C | 34024 | CB  | SER | L | 60 | 130.351 | 117.470 | 213.255 | 1.00232.99 |























|           |       |     |     |   |    |         |         |         |            |
|-----------|-------|-----|-----|---|----|---------|---------|---------|------------|
| ATOM<br>C | 34275 | CG  | ASN | L | 92 | 122.862 | 132.547 | 192.292 | 1.00189.18 |
| ATOM<br>O | 34276 | OD1 | ASN | L | 92 | 122.064 | 131.910 | 191.615 | 1.00255.87 |
| ATOM<br>N | 34277 | ND2 | ASN | L | 92 | 124.049 | 132.894 | 191.820 | 1.00260.22 |
| ATOM<br>C | 34278 | C   | ASN | L | 92 | 123.754 | 135.207 | 193.409 | 1.00112.93 |
| ATOM<br>O | 34279 | O   | ASN | L | 92 | 124.811 | 135.442 | 192.844 | 1.00140.71 |
| ATOM<br>N | 34280 | N   | SER | L | 93 | 122.701 | 136.021 | 193.402 | 1.00138.80 |
| ATOM<br>C | 34281 | CA  | SER | L | 93 | 122.729 | 137.314 | 192.724 | 1.00161.10 |
| ATOM<br>C | 34282 | CB  | SER | L | 93 | 121.870 | 137.355 | 191.466 | 1.00143.85 |
| ATOM<br>O | 34283 | OG  | SER | L | 93 | 121.787 | 136.087 | 190.833 | 1.00152.47 |
| ATOM<br>C | 34284 | C   | SER | L | 93 | 122.250 | 138.391 | 193.685 | 1.00160.96 |
| ATOM<br>O | 34285 | O   | SER | L | 93 | 121.063 | 138.441 | 193.998 | 1.00190.80 |
| ATOM<br>N | 34286 | N   | TYR | L | 94 | 123.150 | 139.275 | 194.123 | 1.00134.97 |
| ATOM<br>C | 34287 | CA  | TYR | L | 94 | 122.669 | 140.423 | 194.870 | 1.00143.80 |
| ATOM<br>C | 34288 | CB  | TYR | L | 94 | 123.687 | 141.554 | 194.893 | 1.00118.12 |
| ATOM<br>C | 34289 | CG  | TYR | L | 94 | 124.706 | 141.335 | 195.954 | 1.00 90.68 |
| ATOM<br>C | 34290 | CD1 | TYR | L | 94 | 124.317 | 140.950 | 197.222 | 1.00 73.28 |
| ATOM<br>C | 34291 | CE1 | TYR | L | 94 | 125.291 | 140.690 | 198.175 | 1.00 94.26 |
| ATOM<br>C | 34292 | CZ  | TYR | L | 94 | 126.656 | 140.843 | 197.903 | 1.00111.28 |
| ATOM<br>O | 34293 | OH  | TYR | L | 94 | 127.652 | 140.590 | 198.846 | 1.00 74.75 |
| ATOM<br>C | 34294 | CE2 | TYR | L | 94 | 127.023 | 141.271 | 196.630 | 1.00112.44 |
| ATOM<br>C | 34295 | CD2 | TYR | L | 94 | 126.049 | 141.502 | 195.667 | 1.00 90.26 |
| ATOM<br>C | 34296 | C   | TYR | L | 94 | 121.440 | 141.022 | 194.198 | 1.00169.55 |
| ATOM<br>O | 34297 | O   | TYR | L | 94 | 121.270 | 140.880 | 192.982 | 1.00173.42 |
| ATOM<br>N | 34298 | N   | PRO | L | 95 | 120.583 | 141.750 | 194.961 | 1.00170.92 |
| ATOM<br>C | 34299 | CA  | PRO | L | 95 | 120.658 | 141.798 | 196.432 | 1.00148.57 |









































|           |       |      |     |   |     |         |         |         |      |       |
|-----------|-------|------|-----|---|-----|---------|---------|---------|------|-------|
| ATOM<br>H | 34750 | HA   | SER | L | 131 | 97.615  | 150.577 | 233.377 | 1.00 | 60.01 |
| ATOM<br>H | 34751 | HB2  | SER | L | 131 | 100.093 | 150.865 | 234.684 | 1.00 | 63.74 |
| ATOM<br>H | 34752 | HB3  | SER | L | 131 | 99.822  | 149.813 | 233.524 | 1.00 | 63.74 |
| ATOM<br>H | 34753 | HG   | SER | L | 131 | 99.183  | 152.084 | 232.695 | 1.00 | 65.61 |
| ATOM<br>N | 34754 | N    | VAL | L | 132 | 96.963  | 148.615 | 234.656 | 1.00 | 46.82 |
| ATOM<br>C | 34755 | CA   | VAL | L | 132 | 96.641  | 147.380 | 235.362 | 1.00 | 48.65 |
| ATOM<br>C | 34756 | C    | VAL | L | 132 | 97.409  | 146.259 | 234.695 | 1.00 | 46.43 |
| ATOM<br>O | 34757 | O    | VAL | L | 132 | 97.395  | 146.152 | 233.467 | 1.00 | 48.57 |
| ATOM<br>C | 34758 | CB   | VAL | L | 132 | 95.132  | 147.074 | 235.334 | 1.00 | 45.95 |
| ATOM<br>C | 34759 | CG1  | VAL | L | 132 | 94.786  | 146.073 | 236.416 | 1.00 | 44.50 |
| ATOM<br>C | 34760 | CG2  | VAL | L | 132 | 94.339  | 148.317 | 235.476 | 1.00 | 46.26 |
| ATOM<br>H | 34761 | H    | VAL | L | 132 | 96.598  | 148.662 | 233.878 | 1.00 | 56.21 |
| ATOM<br>H | 34762 | HA   | VAL | L | 132 | 96.918  | 147.463 | 236.287 | 1.00 | 58.40 |
| ATOM<br>H | 34763 | HB   | VAL | L | 132 | 94.902  | 146.683 | 234.477 | 1.00 | 55.17 |
| ATOM<br>H | 34764 | HG11 | VAL | L | 132 | 93.825  | 145.948 | 236.434 | 1.00 | 53.43 |
| ATOM<br>H | 34765 | HG12 | VAL | L | 132 | 95.226  | 145.230 | 236.220 | 1.00 | 53.43 |
| ATOM<br>H | 34766 | HG13 | VAL | L | 132 | 95.091  | 146.415 | 237.271 | 1.00 | 53.43 |
| ATOM<br>H | 34767 | HG21 | VAL | L | 132 | 93.417  | 148.084 | 235.673 | 1.00 | 55.54 |
| ATOM<br>H | 34768 | HG22 | VAL | L | 132 | 94.708  | 148.846 | 236.200 | 1.00 | 55.54 |
| ATOM<br>H | 34769 | HG23 | VAL | L | 132 | 94.383  | 148.817 | 234.646 | 1.00 | 55.54 |
| ATOM<br>N | 34770 | N    | VAL | L | 133 | 98.058  | 145.417 | 235.492 | 1.00 | 43.73 |
| ATOM<br>C | 34771 | CA   | VAL | L | 133 | 99.015  | 144.441 | 234.986 | 1.00 | 41.24 |
| ATOM<br>C | 34772 | C    | VAL | L | 133 | 98.569  | 143.036 | 235.394 | 1.00 | 49.29 |
| ATOM<br>O | 34773 | O    | VAL | L | 133 | 98.145  | 142.803 | 236.535 | 1.00 | 47.17 |
| ATOM<br>C | 34774 | CB   | VAL | L | 133 | 100.448 | 144.764 | 235.445 | 1.00 | 46.92 |















|           |       |         |       |         |         |         |      |       |
|-----------|-------|---------|-------|---------|---------|---------|------|-------|
| ATOM<br>C | 34925 | CG BARG | L 142 | 104.890 | 130.918 | 223.479 | 0.50 | 64.03 |
| ATOM<br>C | 34926 | CD AARG | L 142 | 104.583 | 132.052 | 222.019 | 0.50 | 69.14 |
| ATOM<br>C | 34927 | CD BARG | L 142 | 105.300 | 131.770 | 222.239 | 0.50 | 67.41 |
| ATOM<br>N | 34928 | NE AARG | L 142 | 104.114 | 133.353 | 221.517 | 0.50 | 66.01 |
| ATOM<br>N | 34929 | NE BARG | L 142 | 104.855 | 131.210 | 220.958 | 0.50 | 63.87 |
| ATOM<br>C | 34930 | CZ AARG | L 142 | 104.846 | 134.465 | 221.467 | 0.50 | 57.27 |
| ATOM<br>C | 34931 | CZ BARG | L 142 | 105.545 | 130.334 | 220.229 | 0.50 | 67.38 |
| ATOM<br>N | 34932 | NH1AARG | L 142 | 104.308 | 135.572 | 220.982 | 0.50 | 59.51 |
| ATOM<br>N | 34933 | NH1BARG | L 142 | 105.045 | 129.884 | 219.077 | 0.50 | 69.30 |
| ATOM<br>N | 34934 | NH2AARG | L 142 | 106.106 | 134.484 | 221.885 | 0.50 | 61.37 |
| ATOM<br>N | 34935 | NH2BARG | L 142 | 106.727 | 129.909 | 220.641 | 0.50 | 61.82 |
| ATOM<br>H | 34936 | H AARG  | L 142 | 103.406 | 127.616 | 223.889 | 0.50 | 80.55 |
| ATOM<br>H | 34937 | H BARG  | L 142 | 103.419 | 127.604 | 223.904 | 0.50 | 80.55 |
| ATOM<br>H | 34938 | HA AARG | L 142 | 103.315 | 129.739 | 225.374 | 0.50 | 76.52 |
| ATOM<br>H | 34939 | HA BARG | L 142 | 103.382 | 129.790 | 225.257 | 0.50 | 76.63 |
| ATOM<br>H | 34940 | HB2AARG | L 142 | 104.766 | 129.735 | 223.580 | 0.50 | 78.71 |
| ATOM<br>H | 34941 | HB2BARG | L 142 | 104.163 | 129.122 | 222.811 | 0.50 | 78.72 |
| ATOM<br>H | 34942 | HB3AARG | L 142 | 103.553 | 129.620 | 222.559 | 0.50 | 78.71 |
| ATOM<br>H | 34943 | HB3BARG | L 142 | 103.139 | 130.318 | 222.601 | 0.50 | 78.72 |
| ATOM<br>H | 34944 | HG2AARG | L 142 | 102.896 | 131.853 | 223.191 | 0.50 | 73.13 |
| ATOM<br>H | 34945 | HG2BARG | L 142 | 104.601 | 131.532 | 224.172 | 0.50 | 76.87 |
| ATOM<br>H | 34946 | HG3AARG | L 142 | 104.230 | 131.955 | 224.050 | 0.50 | 73.13 |
| ATOM<br>H | 34947 | HG3BARG | L 142 | 105.678 | 130.434 | 223.773 | 0.50 | 76.87 |
| ATOM<br>H | 34948 | HD2AARG | L 142 | 105.522 | 132.141 | 222.245 | 0.50 | 82.99 |
| ATOM<br>H | 34949 | HD2BARG | L 142 | 104.909 | 132.654 | 222.325 | 0.50 | 80.92 |































































|             |       |     |     |   |     |        |         |         |      |       |
|-------------|-------|-----|-----|---|-----|--------|---------|---------|------|-------|
| ATOM<br>C   | 35625 | CB  | GLU | L | 187 | 88.198 | 157.233 | 239.418 | 1.00 | 68.27 |
| ATOM<br>C   | 35626 | CG  | GLU | L | 187 | 89.579 | 157.234 | 240.031 | 1.00 | 70.47 |
| ATOM<br>C   | 35627 | CD  | GLU | L | 187 | 90.124 | 158.615 | 240.297 | 1.00 | 86.94 |
| ATOM<br>O   | 35628 | OE1 | GLU | L | 187 | 89.608 | 159.592 | 239.702 | 1.00 | 90.02 |
| ATOM<br>O1- | 35629 | OE2 | GLU | L | 187 | 91.075 | 158.721 | 241.108 | 1.00 | 92.13 |
| ATOM<br>H   | 35630 | H   | GLU | L | 187 | 88.913 | 156.290 | 237.269 | 1.00 | 88.61 |
| ATOM<br>H   | 35631 | HA  | GLU | L | 187 | 88.040 | 155.200 | 239.529 | 1.00 | 83.55 |
| ATOM<br>H   | 35632 | HB2 | GLU | L | 187 | 88.185 | 157.886 | 238.701 | 1.00 | 81.95 |
| ATOM<br>H   | 35633 | HB3 | GLU | L | 187 | 87.561 | 157.483 | 240.107 | 1.00 | 81.95 |
| ATOM<br>H   | 35634 | HG2 | GLU | L | 187 | 89.545 | 156.761 | 240.878 | 1.00 | 84.60 |
| ATOM<br>H   | 35635 | HG3 | GLU | L | 187 | 90.189 | 156.786 | 239.425 | 1.00 | 84.60 |
| ATOM<br>N   | 35636 | N   | LYS | L | 188 | 85.883 | 155.646 | 237.376 | 1.00 | 74.87 |
| ATOM<br>C   | 35637 | CA  | LYS | L | 188 | 84.491 | 155.396 | 237.016 | 1.00 | 71.47 |
| ATOM<br>C   | 35638 | C   | LYS | L | 188 | 84.061 | 153.943 | 237.203 | 1.00 | 72.44 |
| ATOM<br>O   | 35639 | O   | LYS | L | 188 | 82.927 | 153.599 | 236.857 | 1.00 | 72.08 |
| ATOM<br>C   | 35640 | CB  | LYS | L | 188 | 84.267 | 155.796 | 235.552 | 1.00 | 63.13 |
| ATOM<br>C   | 35641 | CG  | LYS | L | 188 | 84.059 | 157.310 | 235.356 | 1.00 | 73.57 |
| ATOM<br>C   | 35642 | CD  | LYS | L | 188 | 84.376 | 157.843 | 233.951 | 1.00 | 80.62 |
| ATOM<br>C   | 35643 | CE  | LYS | L | 188 | 83.766 | 157.023 | 232.828 | 1.00 | 92.87 |
| ATOM<br>N   | 35644 | NZ  | LYS | L | 188 | 84.002 | 157.667 | 231.484 | 1.00 | 95.92 |
| ATOM<br>H   | 35645 | H   | LYS | L | 188 | 86.400 | 155.690 | 236.689 | 1.00 | 89.88 |
| ATOM<br>H   | 35646 | HA  | LYS | L | 188 | 83.927 | 155.941 | 237.585 | 1.00 | 85.80 |
| ATOM<br>H   | 35647 | HB2 | LYS | L | 188 | 85.042 | 155.534 | 235.032 | 1.00 | 75.78 |
| ATOM<br>H   | 35648 | HB3 | LYS | L | 188 | 83.476 | 155.343 | 235.221 | 1.00 | 75.78 |
| ATOM<br>H   | 35649 | HG2 | LYS | L | 188 | 83.129 | 157.518 | 235.540 | 1.00 | 88.31 |









|             |       |               |        |         |         |      |       |
|-------------|-------|---------------|--------|---------|---------|------|-------|
| ATOM<br>C   | 35750 | CB BCYS L 194 | 93.434 | 139.507 | 233.743 | 0.99 | 60.49 |
| ATOM<br>S   | 35751 | SG ACYS L 194 | 94.528 | 139.083 | 235.148 | 0.01 | 67.47 |
| ATOM<br>S   | 35752 | SG BCYS L 194 | 94.455 | 139.029 | 235.073 | 0.99 | 70.75 |
| ATOM<br>H   | 35753 | H ACYS L 194  | 91.837 | 139.869 | 235.865 | 0.01 | 60.22 |
| ATOM<br>H   | 35754 | H BCYS L 194  | 91.839 | 139.871 | 235.865 | 0.99 | 60.22 |
| ATOM<br>H   | 35755 | HA ACYS L 194 | 91.514 | 139.804 | 233.168 | 0.01 | 70.07 |
| ATOM<br>H   | 35756 | HA BCYS L 194 | 91.507 | 139.825 | 233.184 | 0.99 | 70.43 |
| ATOM<br>H   | 35757 | HB2ACYS L 194 | 93.696 | 138.986 | 233.021 | 0.01 | 72.15 |
| ATOM<br>H   | 35758 | HB2BCYS L 194 | 93.670 | 138.942 | 232.990 | 0.99 | 72.62 |
| ATOM<br>H   | 35759 | HB3ACYS L 194 | 93.625 | 140.475 | 233.575 | 0.01 | 72.15 |
| ATOM<br>H   | 35760 | HB3BCYS L 194 | 93.644 | 140.431 | 233.543 | 0.99 | 72.62 |
| ATOM<br>N   | 35761 | N GLU L 195   | 90.987 | 137.440 | 232.923 | 1.00 | 58.14 |
| ATOM<br>C   | 35762 | CA GLU L 195  | 90.532 | 136.076 | 232.757 | 1.00 | 60.64 |
| ATOM<br>C   | 35763 | C GLU L 195   | 91.503 | 135.408 | 231.809 | 1.00 | 57.40 |
| ATOM<br>O   | 35764 | O GLU L 195   | 91.857 | 135.965 | 230.760 | 1.00 | 56.09 |
| ATOM<br>C   | 35765 | CB GLU L 195  | 89.116 | 136.044 | 232.196 | 1.00 | 65.96 |
| ATOM<br>C   | 35766 | CG GLU L 195  | 88.367 | 134.704 | 232.254 | 1.00 | 78.25 |
| ATOM<br>C   | 35767 | CD GLU L 195  | 87.145 | 134.728 | 231.316 | 1.00 | 86.12 |
| ATOM<br>O   | 35768 | OE1 GLU L 195 | 87.326 | 135.037 | 230.109 | 1.00 | 82.51 |
| ATOM<br>O1- | 35769 | OE2 GLU L 195 | 86.006 | 134.498 | 231.783 | 1.00 | 92.32 |
| ATOM<br>H   | 35770 | H GLU L 195   | 90.875 | 137.906 | 232.210 | 1.00 | 69.79 |
| ATOM<br>H   | 35771 | HA GLU L 195  | 90.518 | 135.597 | 233.601 | 1.00 | 72.80 |
| ATOM<br>H   | 35772 | HB2 GLU L 195 | 88.584 | 136.684 | 232.693 | 1.00 | 79.18 |
| ATOM<br>H   | 35773 | HB3 GLU L 195 | 89.160 | 136.300 | 231.262 | 1.00 | 79.18 |
| ATOM<br>H   | 35774 | HG2 GLU L 195 | 88.959 | 133.989 | 231.973 | 1.00 | 93.92 |









|           |       |      |           |        |         |         |      |       |
|-----------|-------|------|-----------|--------|---------|---------|------|-------|
| ATOM<br>O | 35850 | O    | LEU L 201 | 91.648 | 124.614 | 231.404 | 1.00 | 68.88 |
| ATOM<br>C | 35851 | CB   | LEU L 201 | 93.312 | 126.447 | 233.029 | 1.00 | 66.51 |
| ATOM<br>C | 35852 | CG   | LEU L 201 | 94.500 | 127.225 | 233.573 | 1.00 | 65.94 |
| ATOM<br>C | 35853 | CD1  | LEU L 201 | 94.300 | 128.679 | 233.177 | 1.00 | 58.26 |
| ATOM<br>C | 35854 | CD2  | LEU L 201 | 94.648 | 127.062 | 235.093 | 1.00 | 55.37 |
| ATOM<br>H | 35855 | H    | LEU L 201 | 94.363 | 124.768 | 231.298 | 1.00 | 77.49 |
| ATOM<br>H | 35856 | HA   | LEU L 201 | 93.602 | 124.601 | 233.892 | 1.00 | 73.35 |
| ATOM<br>H | 35857 | HB2  | LEU L 201 | 93.171 | 126.753 | 232.119 | 1.00 | 79.83 |
| ATOM<br>H | 35858 | HB3  | LEU L 201 | 92.548 | 126.681 | 233.579 | 1.00 | 79.83 |
| ATOM<br>H | 35859 | HG   | LEU L 201 | 95.333 | 126.888 | 233.204 | 1.00 | 79.15 |
| ATOM<br>H | 35860 | HD11 | LEU L 201 | 95.039 | 129.203 | 233.520 | 1.00 | 69.93 |
| ATOM<br>H | 35861 | HD12 | LEU L 201 | 94.269 | 128.740 | 232.209 | 1.00 | 69.93 |
| ATOM<br>H | 35862 | HD13 | LEU L 201 | 93.466 | 128.996 | 233.555 | 1.00 | 69.93 |
| ATOM<br>H | 35863 | HD21 | LEU L 201 | 95.303 | 127.700 | 235.418 | 1.00 | 66.47 |
| ATOM<br>H | 35864 | HD22 | LEU L 201 | 93.789 | 127.227 | 235.514 | 1.00 | 66.47 |
| ATOM<br>H | 35865 | HD23 | LEU L 201 | 94.942 | 126.159 | 235.288 | 1.00 | 66.47 |
| ATOM<br>N | 35866 | N    | SER L 202 | 91.445 | 123.548 | 233.392 | 1.00 | 72.88 |
| ATOM<br>C | 35867 | CA   | SER L 202 | 90.171 | 122.926 | 233.026 | 1.00 | 75.35 |
| ATOM<br>C | 35868 | C    | SER L 202 | 89.116 | 123.968 | 232.707 | 1.00 | 73.07 |
| ATOM<br>O | 35869 | O    | SER L 202 | 88.259 | 123.745 | 231.848 | 1.00 | 77.28 |
| ATOM<br>C | 35870 | CB   | SER L 202 | 89.686 | 122.009 | 234.156 | 1.00 | 69.47 |
| ATOM<br>O | 35871 | OG   | SER L 202 | 89.741 | 122.698 | 235.390 | 1.00 | 73.84 |
| ATOM<br>H | 35872 | H    | SER L 202 | 91.717 | 123.364 | 234.188 | 1.00 | 87.48 |
| ATOM<br>H | 35873 | HA   | SER L 202 | 90.307 | 122.381 | 232.236 | 1.00 | 90.45 |
| ATOM<br>H | 35874 | HB2  | SER L 202 | 88.770 | 121.742 | 233.979 | 1.00 | 83.40 |

|           |       |     |           |        |         |         |      |       |
|-----------|-------|-----|-----------|--------|---------|---------|------|-------|
| ATOM<br>H | 35875 | HB3 | SER L 202 | 90.258 | 121.227 | 234.201 | 1.00 | 83.40 |
| ATOM<br>H | 35876 | HG  | SER L 202 | 89.784 | 122.149 | 236.024 | 1.00 | 88.64 |
| ATOM<br>N | 35877 | N   | SER L 203 | 89.153 | 125.107 | 233.379 | 1.00 | 80.13 |
| ATOM<br>C | 35878 | CA  | SER L 203 | 88.299 | 126.214 | 232.964 | 1.00 | 78.19 |
| ATOM<br>C | 35879 | C   | SER L 203 | 89.042 | 127.532 | 233.179 | 1.00 | 77.88 |
| ATOM<br>O | 35880 | O   | SER L 203 | 90.119 | 127.541 | 233.794 | 1.00 | 75.80 |
| ATOM<br>C | 35881 | CB  | SER L 203 | 86.967 | 126.182 | 233.719 | 1.00 | 74.33 |
| ATOM<br>O | 35882 | OG  | SER L 203 | 87.149 | 126.135 | 235.120 | 1.00 | 63.86 |
| ATOM<br>H | 35883 | H   | SER L 203 | 89.652 | 125.262 | 234.062 | 1.00 | 96.18 |
| ATOM<br>H | 35884 | HA  | SER L 203 | 88.090 | 126.141 | 232.021 | 1.00 | 93.86 |
| ATOM<br>H | 35885 | HB2 | SER L 203 | 86.465 | 126.983 | 233.499 | 1.00 | 89.23 |
| ATOM<br>H | 35886 | HB3 | SER L 203 | 86.472 | 125.393 | 233.444 | 1.00 | 89.23 |
| ATOM<br>H | 35887 | HG  | SER L 203 | 86.441 | 126.366 | 235.510 | 1.00 | 76.65 |
| ATOM<br>N | 35888 | N   | PRO L 204 | 88.523 | 128.650 | 232.667 | 1.00 | 68.10 |
| ATOM<br>C | 35889 | CA  | PRO L 204 | 89.253 | 129.915 | 232.791 | 1.00 | 66.28 |
| ATOM<br>C | 35890 | C   | PRO L 204 | 89.457 | 130.314 | 234.249 | 1.00 | 68.07 |
| ATOM<br>O | 35891 | O   | PRO L 204 | 88.568 | 130.178 | 235.090 | 1.00 | 64.68 |
| ATOM<br>C | 35892 | CB  | PRO L 204 | 88.365 | 130.921 | 232.039 | 1.00 | 67.93 |
| ATOM<br>C | 35893 | CG  | PRO L 204 | 87.597 | 130.098 | 231.061 | 1.00 | 70.22 |
| ATOM<br>C | 35894 | CD  | PRO L 204 | 87.354 | 128.774 | 231.769 | 1.00 | 73.57 |
| ATOM<br>H | 35895 | HA  | PRO L 204 | 90.116 | 129.851 | 232.354 | 1.00 | 79.56 |
| ATOM<br>H | 35896 | HB2 | PRO L 204 | 87.769 | 131.367 | 232.663 | 1.00 | 81.55 |
| ATOM<br>H | 35897 | HB3 | PRO L 204 | 88.918 | 131.576 | 231.584 | 1.00 | 81.55 |
| ATOM<br>H | 35898 | HG2 | PRO L 204 | 86.757 | 130.535 | 230.846 | 1.00 | 84.30 |
| ATOM<br>H | 35899 | HG3 | PRO L 204 | 88.119 | 129.970 | 230.253 | 1.00 | 84.30 |













|             |       |     |           |        |         |         |      |        |
|-------------|-------|-----|-----------|--------|---------|---------|------|--------|
| ATOM<br>C   | 36025 | C   | GLY L 212 | 90.127 | 150.075 | 247.747 | 1.00 | 99.59  |
| ATOM<br>O   | 36026 | O   | GLY L 212 | 89.322 | 150.121 | 248.682 | 1.00 | 105.53 |
| ATOM<br>H   | 36027 | H   | GLY L 212 | 90.996 | 150.698 | 245.012 | 1.00 | 100.22 |
| ATOM<br>H   | 36028 | HA2 | GLY L 212 | 90.874 | 151.761 | 246.889 | 1.00 | 104.41 |
| ATOM<br>H   | 36029 | HA3 | GLY L 212 | 89.298 | 151.685 | 246.820 | 1.00 | 104.41 |
| ATOM<br>N   | 36030 | N   | GLU L 213 | 91.024 | 149.083 | 247.596 | 1.00 | 108.00 |
| ATOM<br>C   | 36031 | CA  | GLU L 213 | 91.158 | 147.929 | 248.493 | 1.00 | 107.66 |
| ATOM<br>C   | 36032 | C   | GLU L 213 | 89.820 | 147.526 | 249.102 | 1.00 | 118.21 |
| ATOM<br>O   | 36033 | O   | GLU L 213 | 89.629 | 147.633 | 250.317 | 1.00 | 131.64 |
| ATOM<br>C   | 36034 | CB  | GLU L 213 | 92.164 | 148.218 | 249.615 | 1.00 | 115.92 |
| ATOM<br>C   | 36035 | CG  | GLU L 213 | 92.476 | 147.027 | 250.544 | 1.00 | 111.50 |
| ATOM<br>C   | 36036 | CD  | GLU L 213 | 93.475 | 146.040 | 249.939 | 1.00 | 113.86 |
| ATOM<br>O   | 36037 | OE1 | GLU L 213 | 94.689 | 146.344 | 249.962 | 1.00 | 98.38  |
| ATOM<br>O1- | 36038 | OE2 | GLU L 213 | 93.049 | 144.973 | 249.436 | 1.00 | 109.69 |
| ATOM<br>H   | 36039 | H   | GLU L 213 | 91.593 | 149.057 | 246.952 | 1.00 | 129.63 |
| ATOM<br>H   | 36040 | HA  | GLU L 213 | 91.484 | 147.184 | 247.965 | 1.00 | 129.22 |
| ATOM<br>H   | 36041 | HB2 | GLU L 213 | 93.001 | 148.497 | 249.210 | 1.00 | 139.13 |
| ATOM<br>H   | 36042 | HB3 | GLU L 213 | 91.810 | 148.933 | 250.168 | 1.00 | 139.13 |
| ATOM<br>H   | 36043 | HG2 | GLU L 213 | 92.853 | 147.364 | 251.374 | 1.00 | 133.83 |
| ATOM<br>H   | 36044 | HG3 | GLU L 213 | 91.653 | 146.545 | 250.726 | 1.00 | 133.83 |
| ATOM<br>N   | 36045 | N   | CYS L 214 | 88.896 | 147.070 | 248.266 | 1.00 | 114.23 |
| ATOM<br>C   | 36046 | CA  | CYS L 214 | 87.564 | 146.663 | 248.714 | 1.00 | 146.10 |
| ATOM<br>C   | 36047 | C   | CYS L 214 | 87.323 | 145.212 | 248.306 | 1.00 | 125.35 |
| ATOM<br>O   | 36048 | O   | CYS L 214 | 86.383 | 144.571 | 248.765 | 1.00 | 128.94 |
| ATOM<br>C   | 36049 | CB  | CYS L 214 | 86.491 | 147.591 | 248.121 | 1.00 | 142.25 |
